# Supplementary material for: A tudor domain protein, SIMR-1, promotes siRNA production at piRNA-targeted mRNAs in C. elegans
Source: eLife. 2020 Apr 27;9:e56731. doi: 10.7554/eLife.56731 (PMC7255803; doi:10.7554/eLife.56731)
Supplement: Figure 3—source data 1. [file elife-56731-fig3-data1.xlsx]

## Sheet: Sheet1
		Generation 0 Brood Size	Generation 1 Brood Size	Generation 2 Brood Size	Generation 3 Brood Size	Generation 4 Brood Size	Generation 5 Brood Size	Generation 6 Brood Size	Generation 7 Brood Size	Generation 8 Brood Size	Generation 9 Brood Size	Generation 10 Brood Size	Generation 11 Brood Size
		20°C	25°C	25°C	25°C	25°C	25°C	25°C	25°C	25°C	25°C	25°C	25°C
wild-type	Replicate 1	371	212	190	226	117	121	127	125	126	198	198	198
wild-type	Replicate 2	239	138	251	133	96	183	184	117	178	11	11	153
wild-type	Replicate 3	170	178	192	149	151	131	139	90	139	177	177	142
wild-type	Replicate 4	267	175	170	174	190	93	126	98	35	50	50	125
wild-type	Replicate 5	284	158	161	162	130	93	119	122	132	154	154	0
wild-type	Replicate 6	381	189	255	107	204	201	115	119	138	149	149	151
wild-type	Replicate 7	296	161	173	149	160	192	99	100	186	199	199	32
wild-type	Replicate 8	307	202	182	194	159	116	158	134	109	155	155	86
wild-type	Replicate 9	293	145	200	181	164	25	106	170	255	192	192	132
wild-type	Replicate 10	257	151	147	37	65	174	136	146	165	113	113	171
simr-1	Replicate 1	267	110	137	105	86	114	55	46	2	26	26	0
simr-1	Replicate 2	166	94	31	131	109	75	0	47	55	67	67	0
simr-1	Replicate 3	262	65	84	90	46	31	26	1	33	7	7	0
simr-1	Replicate 4	307	103	82	23	64	81	34	18	41	44	44	0
simr-1	Replicate 5	265	94	126	78	58	76	73	79	60	0	0	0
simr-1	Replicate 6	179	90	131	0	0	0	0	0	26	68	68	0
simr-1	Replicate 7	297	131	162	102	84	5	0	53	1	99	99	0
simr-1	Replicate 8	296	110	156	124	82	24	0	0	52	41	41	0
simr-1	Replicate 9	302	121	8	43	0	0	0	0	11	0	0	0
simr-1	Replicate 10	314	170	118	59	40	0	0	0	27	51	51	0
simr-1; hpo-40	Replicate 1	266	66	103	0	0	0	0	0	38	4	4	0
simr-1; hpo-40	Replicate 2	253	107	167	111	98	102	30	25	41	20	20	0
simr-1; hpo-40	Replicate 3	256	51	143	68	56	0	0	0	15	0	0	0
simr-1; hpo-40	Replicate 4	238	77	141	73	43	54	54	32	55	31	31	0
simr-1; hpo-40	Replicate 5	282	91	78	52	13	0	0	0	34	1	1	0
simr-1; hpo-40	Replicate 6	263	128	105	66	32	2	0	0	48	23	23	28
simr-1; hpo-40	Replicate 7	299	111	138	89	23	11	0	29	58	18	18	8
simr-1; hpo-40	Replicate 8	256	128	128	135	98	92	60	60	13	10	10	0
simr-1; hpo-40	Replicate 9	71	107	103	75	62	29	0	0	76	63	63	4
simr-1; hpo-40	Replicate 10	214	92	105	118	0	0	0	0	50	60	60	25
hpo-40	Replicate 1	214	210	179	164	121	126	0	76	197	98	98	159
hpo-40	Replicate 2	287	182	170	129	113	89	108	159	237	178	178	165
hpo-40	Replicate 3	237	190	197	158	99	155	97	114	5	37	37	128
hpo-40	Replicate 4	237	163	180	180	194	137	144	132	168	164	164	121
hpo-40	Replicate 5	261	184	88	109	154	140	90	117	127	128	128	148
hpo-40	Replicate 6	304	169	179	184	145	159	99	147	132	165	165	147
hpo-40	Replicate 7	274	25	80	161	64	176	1	90	158	153	153	107
hpo-40	Replicate 8	223	169	159	92	14	9	2	0	140	98	98	131
hpo-40	Replicate 9	220	165	83	228	114	160	163	117	195	140	140	107
hpo-40	Replicate 10	272	170	206	165	170	166	163	116	37	111	111	0
mut-16	Replicate 1	206	0	0	0	0	0	0	0	0	0	0	0
mut-16	Replicate 2	103	14	0	0	0	0	0	0	0	0	0	0
mut-16	Replicate 3	162	0	0	0	0	0	0	0	0	0	0	0
mut-16	Replicate 4	7	15	0	0	0	0	0	0	0	0	0	0
mut-16	Replicate 5	187	10	0	0	0	0	0	0	0	0	0	0
mut-16	Replicate 6	251	1	0	0	0	0	0	0	0	0	0	0
mut-16	Replicate 7	168	1	0	0	0	0	0	0	0	0	0	0
mut-16	Replicate 8	151	30	0	0	0	0	0	0	0	0	0	0
mut-16	Replicate 9	31	0	0	0	0	0	0	0	0	0	0	0
mut-16	Replicate 10	235	0	0	0	0	0	0	0	0	0	0	0
