# Supplementary material for: A tudor domain protein, SIMR-1, promotes siRNA production at piRNA-targeted mRNAs in C. elegans
Source: eLife. 2020 Apr 27;9:e56731. doi: 10.7554/eLife.56731 (PMC7255803; doi:10.7554/eLife.56731)
Supplement: Figure 3—source data 2. [file elife-56731-fig3-data2.xlsx]

## Sheet: Sheet1
		Generation 11 Brood Size	Generation 12 Brood Size	Generation 13 Brood Size	Generation 14 Brood Size	Generation 15 Brood Size	Generation 16 Brood Size	Generation 17 Brood Size	Generation 18 Brood Size	Generation 19 Brood Size	Generation 20 Brood Size
		20°C	20°C	20°C	20°C	20°C	20°C	20°C	20°C	20°C	20°C
wild-type	Replicate 1	273	295	371	314	286	373	253	184	301	221
wild-type	Replicate 2	70	231	327	316	242	312	203	356	287	198
wild-type	Replicate 3	298	293	340	260	267	111	181	234	194	214
wild-type	Replicate 4	26	149	135	45	125	174	241	202	211	191
wild-type	Replicate 5	182	239	226	124	296	142	214	228	211	218
wild-type	Replicate 6	297	293	318	206	278	226	236	179	243	317
wild-type	Replicate 7	283	295	299	323	275	119	211	203	209	313
wild-type	Replicate 8	288	299	286	308	167	360	238	216	187	150
wild-type	Replicate 9	120	181	194	282	254	426	249	221	186	196
wild-type	Replicate 10	289	296	344	258	281	317	251	201	259	145
simr-1	Replicate 1	142	110	113	180	112	165	177	153	181	62
simr-1	Replicate 2	182	102	135	152	43	147	156	119	163	215
simr-1	Replicate 3	169	171	177	217	161	180	130	124	189	81
simr-1	Replicate 4	2	0	90	107	65	68	113	224	156	85
simr-1	Replicate 5	6	0	216	284	299	309	201	214	188	167
simr-1	Replicate 6	162	172	81	155	70	104	232	145	173	14
simr-1	Replicate 7	42	9	99	123	43	59	214	142	133	79
simr-1	Replicate 8	148	70	144	206	253	266	242	147	253	199
simr-1	Replicate 9	111	217	272	271	170	183	218	243	247	197
simr-1	Replicate 10	113	0	209	238	253	283	119	187	14	209
simr-1; hpo-40	Replicate 1	159	239	22	27	214	212	261	113	268	228
simr-1; hpo-40	Replicate 2	135	175	276	293	153	114	44	170	166	142
simr-1; hpo-40	Replicate 3	257	220	290	226	292	260	261	266	237	185
simr-1; hpo-40	Replicate 4	133	59	244	165	162	139	210	272	247	205
simr-1; hpo-40	Replicate 5	49	12	1	0	243	169	89	92	90	21
simr-1; hpo-40	Replicate 6	160	165	218	236	175	288	284	207	229	82
simr-1; hpo-40	Replicate 7	176	195	19	187	197	288	209	287	248	254
simr-1; hpo-40	Replicate 8	29	14	36	102	170	150	95	28	22	93
simr-1; hpo-40	Replicate 9	92	125	101	212	284	248	155	197	169	161
simr-1; hpo-40	Replicate 10	0	176	177	247	204	239	246	232	205	169
