# Supplementary material for: A tudor domain protein, SIMR-1, promotes siRNA production at piRNA-targeted mRNAs in C. elegans
Source: eLife. 2020 Apr 27;9:e56731. doi: 10.7554/eLife.56731 (PMC7255803; doi:10.7554/eLife.56731)
Supplement: Figure 3—source data 3. [file elife-56731-fig3-data3.xlsx]

## Sheet: Sheet1
20°C (Generation 0) wild-type ♂ x 20°C fog-2				20°C (Generation 0) simr-1 ♂ x 20°C fog-2
Replicate #	Brood Size			Replicate #	Brood Size
Replicate 1	457			Replicate 1	267
Replicate 2	513			Replicate 2	491
Replicate 3	398			Replicate 3	520
Replicate 4	366			Replicate 4	406
Replicate 5	497			Replicate 5	378
Replicate 6	583			Replicate 6	317
Replicate 7	432			Replicate 7	517
Replicate 8	430			Replicate 8	495
Replicate 9	522			Replicate 9	457
Replicate 10	480			Replicate 10	226
25°C (Generation 1) wild-type ♂ x 20°C fog-2				25°C (Generation 1) simr-1 ♂ x 20°C fog-2
Replicate #	Brood Size			Replicate #	Brood Size
Replicate 1	449			Replicate 1	0
Replicate 2	339			Replicate 2	0
Replicate 3	0			Replicate 3	285
Replicate 4	284			Replicate 4	166
Replicate 5	0			Replicate 5	0
Replicate 6	39			Replicate 6	0
Replicate 7	348			Replicate 7	81
Replicate 8	0			Replicate 8	0
Replicate 9	0			Replicate 9	2
Replicate 10	211			Replicate 10	0
25°C (Generation 10) wild-type ♂ x 20°C fog-2				25°C (Generation 10) simr-1 ♂ x 20°C fog-2
Replicate #	Brood Size			Replicate #	Brood Size
Replicate 1	34			Replicate 1	0
Replicate 2	275			Replicate 2	0
Replicate 3	178			Replicate 3	0
Replicate 4	55			Replicate 4	0
Replicate 5	83			Replicate 5	0
Replicate 6	240			Replicate 6	89
Replicate 7	202			Replicate 7	0
Replicate 8	119			Replicate 8	0
Replicate 9	244			Replicate 9	0
Replicate 10	12			Replicate 10	0
