# Supplementary material for: A tudor domain protein, SIMR-1, promotes siRNA production at piRNA-targeted mRNAs in C. elegans
Source: eLife. 2020 Apr 27;9:e56731. doi: 10.7554/eLife.56731 (PMC7255803; doi:10.7554/eLife.56731)
Supplement: Figure 3—source data 4. [file elife-56731-fig3-data4.xlsx]

## Sheet: Sheet1
20°C (Generation 0) wild-type x 20°C pgl-1:gfp ♂					20°C (Generation 0) simr-1 x 20°C pgl-1:gfp ♂
Replicate #	Brood Size				Replicate #	Brood Size
Replicate 1	215				Replicate 1	373
Replicate 2	423				Replicate 2	315
Replicate 3	346				Replicate 3	267
Replicate 4	471				Replicate 4	266
Replicate 5	399				Replicate 5	368
Replicate 6	415				Replicate 6	376
Replicate 7	328				Replicate 7	415
Replicate 8	407				Replicate 8	275
Replicate 9	377				Replicate 9	359
Replicate 10	375				Replicate 10	355
25°C (Generation 1) wild-type x 20°C pgl-1:gfp ♂					25°C (Generation 1) simr-1 x 20°C pgl-1:gfp ♂
Replicate #	Brood Size				Replicate #	Brood Size
Replicate 1	319				Replicate 1	127
Replicate 2	258				Replicate 2	210
Replicate 3	254				Replicate 3	337
Replicate 4	247				Replicate 4	271
Replicate 5	250				Replicate 5	152
Replicate 6	253				Replicate 6	222
Replicate 7	313				Replicate 7	255
Replicate 8	356				Replicate 8	314
Replicate 9	318				Replicate 9	100
Replicate 10	162				Replicate 10	226
25°C (Generation 10) wild-type x 20°C pgl-1:gfp ♂					25°C (Generation 10) simr-1 x 20°C pgl-1:gfp ♂
Replicate #	Brood Size				Replicate #	Brood Size
Replicate 1	383				Replicate 1	0
Replicate 2	0				Replicate 2	0
Replicate 3	436				Replicate 3	0
Replicate 4	0				Replicate 4	132
Replicate 5	423				Replicate 5	0
Replicate 6	315				Replicate 6	0
Replicate 7	372				Replicate 7	0
Replicate 8	232				Replicate 8	0
Replicate 9	440				Replicate 9	31
Replicate 10	0				Replicate 10	0
