# Supplementary material for: A tudor domain protein, SIMR-1, promotes siRNA production at piRNA-targeted mRNAs in C. elegans
Source: eLife. 2020 Apr 27;9:e56731. doi: 10.7554/eLife.56731 (PMC7255803; doi:10.7554/eLife.56731)
Supplement: Figure 3—source data 5. [file elife-56731-fig3-data5.xlsx]

## Sheet: Sheet1
Generation 0 Apoptotic Cell Count Per Gonad		Generation 1 Apoptotic Cell Count Per Gonad		Generation 2 Apoptotic Cell Count Per Gonad		Generation 4 Apoptotic Cell Count Per Gonad		Generation 7 Apoptotic Cell Count Per Gonad		Generation 10 Apoptotic Cell Count Per Gonad		Generation 11 Apoptotic Cell Count Per Gonad
20°C		25°C		25°C		25°C		25°C		25°C		25°C
wild-type	simr-1	wild-type	simr-1	wild-type	simr-1	wild-type	simr-1	wild-type	simr-1	wild-type	simr-1	wild-type	simr-1
5	1	37	18	10	14	22	12	20	28	15	21	15	22
3	3	40	19	4	14	25	14	13	14	16	25	20	20
6	4	21	22	7	12	20	12	11	15	20	23	13	35
2	4	22	27	0	11	15	22	16	23	15	30	12	24
1	3	39	25	9	19	23	24	14	17	17	26	24	24
3	5	30	28	19	9	16	45	18	14	7	29	20	25
4	2	27	15	8	10	10	17	35	20	9	27	11	24
2	5	38	19	10	12	35	18	20	24	23	30	28	24
6	7	28	22	12	8	14	18	12	11	10	26	14	27
5	5	21	35	9	13	28	10	14	24	18	30	14	19
6	6	5	31	9	14	18	8	7	18	23	22	11	28
3	7	37	27	15	12	9	15	22	16	11	32	14	21
7	9	58	31	13	7	26	25	14	18	26	22	13	42
9	7	26	19	6	16	14	24	9	12	8	19	12	21
7	4	19	32	6	12	9	20	16	23	14	13	12	23
8	10	22	10	9	9	10	14	18	30	28	22	14	24
4	3	21	13	11	9	10	14	9	23	13	18	17	23
6	5	37	18	7	10	23	10	2	13	16	15	19	22
5	3	28	25	10	8	22	16	25	16	16	34	19	26
3	1	26	12	9	8	31	11	26	17	13	19	17	23
2	5	24	15	9	7	10		17	15	9	16
6	6					26		14	21	0	24
4	3								12
7	2
6	4
7	9
4	10
5	6
2	8
13	5
3	3
	7
