# Supplementary material for: A tudor domain protein, SIMR-1, promotes siRNA production at piRNA-targeted mRNAs in C. elegans
Source: eLife. 2020 Apr 27;9:e56731. doi: 10.7554/eLife.56731 (PMC7255803; doi:10.7554/eLife.56731)
Supplement: Figure 4—source data 1. [file elife-56731-fig4-data1.xlsx]

## Sheet: Sheet1
	Sterile F1	Total F1
wild-type	10	77
prg-1	86	87
simr-1	40	85
