# Supplementary material for: A tudor domain protein, SIMR-1, promotes siRNA production at piRNA-targeted mRNAs in C. elegans
Source: eLife. 2020 Apr 27;9:e56731. doi: 10.7554/eLife.56731 (PMC7255803; doi:10.7554/eLife.56731)
Supplement: Figure 4—source data 2. [file elife-56731-fig4-data2.xlsx]

## Sheet: Sheet1
		Generation 0 Brood Size	Generation 1 Brood Size	Generation 5 Brood Size	Generation 7 Brood Size	Generation 10 Brood Size	Generation 11 Brood Size
		20°C	25°C	25°C	25°C	25°C	25°C
simr-1::gfp	Replicate 1	292	170	110	169	114	149
simr-1::gfp	Replicate 2	303	285	187	36	103	20
simr-1::gfp	Replicate 3	324	157	146	140	106	128
simr-1::gfp	Replicate 4	286	181	209	0	102	78
simr-1::gfp	Replicate 5	293	197	213	181	112	112
simr-1::gfp	Replicate 6	294	195	149	31	107	126
simr-1::gfp	Replicate 7	289	181	84	189	108	134
simr-1::gfp	Replicate 8	316	181	113	189	145	135
simr-1::gfp	Replicate 9	289	252	109	187	105	138
simr-1::gfp	Replicate 10	304	156	198	160	123	126
simr-1[R159C]::gfp	Replicate 1	306	120	0	0	0	0
simr-1[R159C]::gfp	Replicate 2	312	89	0	14	2	0
simr-1[R159C]::gfp	Replicate 3	331	143	50	3	6	0
simr-1[R159C]::gfp	Replicate 4	247	145	61	6	0	0
simr-1[R159C]::gfp	Replicate 5	303	130	62	12	0	0
simr-1[R159C]::gfp	Replicate 6	314	97	0	54	0	0
simr-1[R159C]::gfp	Replicate 7	298	85	47	0	9	0
simr-1[R159C]::gfp	Replicate 8	296	149	63	40	0	0
simr-1[R159C]::gfp	Replicate 9	289	70	60	3	0	0
simr-1[R159C]::gfp	Replicate 10	358	165	61	36	0	0
