# Supplementary material for: A tudor domain protein, SIMR-1, promotes siRNA production at piRNA-targeted mRNAs in C. elegans
Source: eLife. 2020 Apr 27;9:e56731. doi: 10.7554/eLife.56731 (PMC7255803; doi:10.7554/eLife.56731)
Supplement: Figure 7—source data 1. [file elife-56731-fig7-data1.xlsx]

## Sheet: foci distance
SIMR-1 to RSD-2
Distance X	Distance Y	Distance Z	Corrected Distance
-0.039	-0.04	-0.164	0.0668031
-0.093	0.059	-0.029	0.118949
-0.126	0.068	-0.039	0.133605
-0.105	-0.069	-0.069	0.0691947
-0.071	-0.109	-0.154	0.0966872
-0.021	-0.007	-0.235	0.140863
-0.071	0.074	-0.165	0.122025
-0.076	0.074	-0.168	0.124235
0.035	0.07	-0.218	0.179537
-0.072	-0.087	-0.12	0.0624192
0.009	-0.033	0.005	0.12566
0.006	-0.074	0.043	0.163994
-0.081	0.036	-0.106	0.0691242
-0.003	-0.061	-0.197	0.115319
-0.083	-0.068	-0.173	0.0854497
-0.104	-0.137	-0.145	0.125119
-0.003	-0.049	-0.127	0.0643227
-0.041	-0.12	-0.178	0.120371
-0.109	-0.114	-0.168	0.119397
-0.158	0.008	-0.136	0.11193
-0.003	-0.01	-0.177	0.0959591
-0.201	0.034	-0.182	0.175749
-0.05	0.018	-0.292	0.196906
-0.006	-0.109	-0.068	0.101055
			0.116028	AVERAGE
			0.00761414	SEM
SIMR-1 to MUT-16
Distance X	Distance Y	Distance Z	Corrected Distance
0.014	0.047	-0.098	0.105082
-0.016	0.024	0.112	0.223578
-0.16	-0.025	0.151	0.271751
0.024	-0.089	-0.183	0.130747
-0.089	-0.074	0.035	0.14645
0.083	-0.052	-0.012	0.168615
-0.064	0.056	0.119	0.235962
0.137	0.159	-0.316	0.346103
0.219	0.194	0.416	0.627703
-0.078	-0.203	-0.151	0.181983
-0.088	-0.033	0.117	0.220038
-0.043	0.044	-0.175	0.105165
-0.081	-0.112	-0.168	0.108946
-0.157	-0.062	-0.015	0.134921
-0.005	-0.139	0.01	0.165053
0.065	0.043	-0.039	0.15578
0.067	-0.056	0.031	0.184025
-0.108	0.155	0.005	0.218176
0.119	0.113	0.137	0.329098
-0.032	-0.038	0.018	0.12221
-0.091	0.181	0.062	0.267929
-0.15	-0.056	-0.036	0.115509
-0.142	-0.103	-0.047	0.123962
-0.134	-0.043	0.119	0.233049
			0.205076	AVERAGE
			0.0231436	SEM
SIMR-1 to ZNFX-1
Distance X	Distance Y	Distance Z	Corrected Distance
0.013	-0.023	-0.414	0.321093
-0.066	-0.054	-0.274	0.174945
-0.238	-0.078	-0.37	0.327131
-0.063	-0.086	-0.347	0.252531
-0.062	0.025	-0.213	0.124445
-0.061	-0.068	-0.29	0.192974
0.01	-0.066	-0.346	0.257021
-0.062	0.012	-0.566	0.466829
-0.072	-0.001	-0.474	0.374307
-0.125	-0.177	-0.313	0.266927
-0.007	0.041	-0.363	0.276045
-0.131	0.014	-0.144	0.0947795
-0.058	-0.094	-0.17	0.0947096
0.022	-0.04	-0.151	0.0952807
-0.06	-0.106	-0.203	0.127736
-0.063	-0.112	-0.176	0.111869
-0.098	-0.029	-0.194	0.10109
-0.144	0.008	-0.179	0.12163
-0.079	-0.011	-0.229	0.130912
-0.103	0.014	-0.137	0.0717437
-0.007	-0.031	-0.107	0.0517582
-0.044	-0.094	-0.149	0.081972
-0.129	0.064	-0.153	0.127922
-0.033	-0.077	-0.142	0.0679478
			0.179733	AVERAGE
			0.0228022	SEM
SIMR-1 to PGL
Distance X	Distance Y	Distance Z	Corrected Distance
-0.26	-0.028	0.155	0.255325
0.084	0.075	0.36	0.218368
0.127	0.089	0.403	0.276707
-0.157	0.1	0.162	0.208258
0.134	0.28	0.038	0.387625
-0.248	0.076	0.427	0.349528
0.159	-0.319	-0.106	0.446335
-0.099	0.027	0.328	0.17037
-0.144	0.119	-0.051	0.32742
-0.098	-0.009	-0.071	0.287519
0.283	-0.125	0.0426	0.342406
0.386	0.04	0.116	0.412197
-0.325	0.023	0.314	0.341789
-0.142	0.019	0.387	0.236851
-0.158	-0.066	0.28	0.170541
0.064	-0.061	0.028	0.188371
-0.175	-0.069	0.203	0.168158
-0.019	-0.256	0.179	0.215801
-0.101	-0.066	0.306	0.142026
-0.133	0.042	0.2	0.14939
-0.114	-0.181	0.236	0.178099
0.021	0.034	0.328	0.151209
-0.385	0.071	0.395	0.437914
0.025	0.025	0.06	0.159145
			0.259223	AVERAGE
			0.020157	SEM
Bead Correction Values
X	Y	Z
-0.058375	-0.029125	-0.101	Green-Red
-0.009125	-0.0415	0.2005	Red-Far Red
