# Supplementary material for: A tudor domain protein, SIMR-1, promotes siRNA production at piRNA-targeted mRNAs in C. elegans
Source: eLife journal article supplement (doi:10.7554/elife.56731), 2020-04-27

A

| Protein          | Description                    | % Coverage (Peptide Counts) |           |             |         |
|------------------|--------------------------------|-----------------------------|-----------|-------------|---------|
|                  |                                | FLAG IP                     |           | GFP IP      |         |
|                  |                                | MUT-16                      | control   | MUT-16      | control |
| RSD-2/F52G2.2    | Unknown function               | 25.63% (32)                 | 2.2% (2)  | 35.18% (42) | 0% (0)  |
| WAGO-1/R06C7.1   | WAGO Argonaute                 | 17.14% (14)                 | 3.92% (3) | 13.86% (14) | 0% (0)  |
| MATH-33/H19N07.2 | Ubiquitin C-terminal hydrolase | 11.28% (11)                 | 1.15% (1) | 13.13% (11) | 0% (0)  |

B

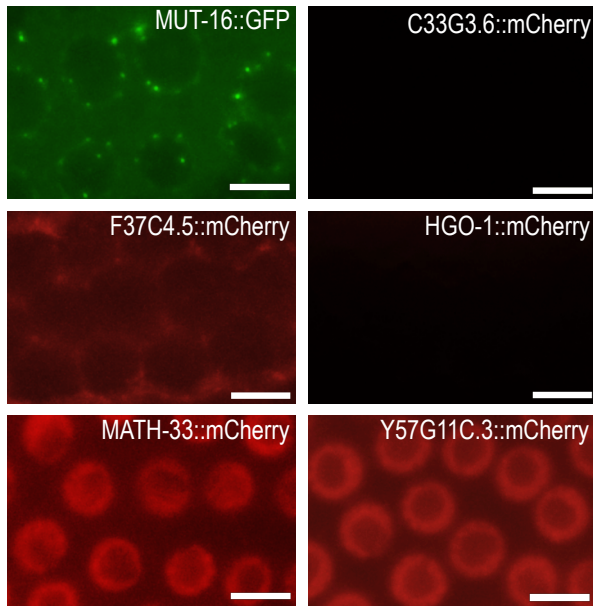

C

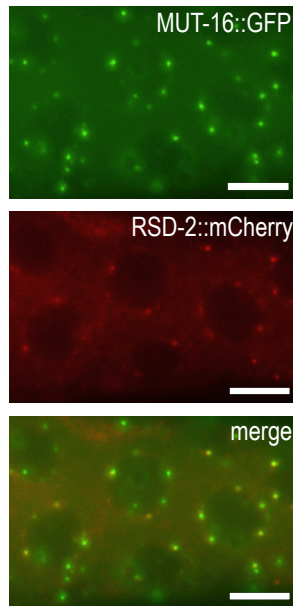

D

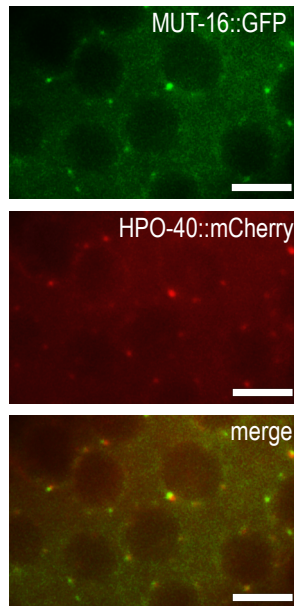

Supplement: supp [file elife_poa_e56731_Figure_1_figure_supplement_1.pdf › elife_poa_e56731_Figure_1_figure_supplement_1.pdf]
