# Supplementary material for: A tudor domain protein, SIMR-1, promotes siRNA production at piRNA-targeted mRNAs in C. elegans
Source: eLife journal article supplement (doi:10.7554/elife.56731), 2020-04-27

**A**small RNAs targeting  
*mutator*-class genes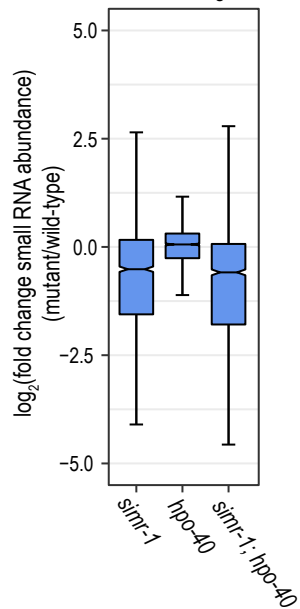**B**small RNAs targeting *mutator*-class genes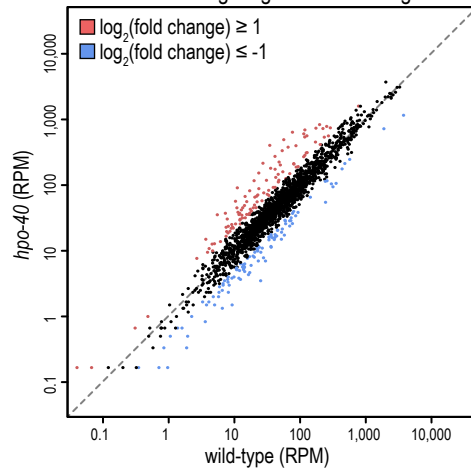small RNAs targeting *mutator*-class genes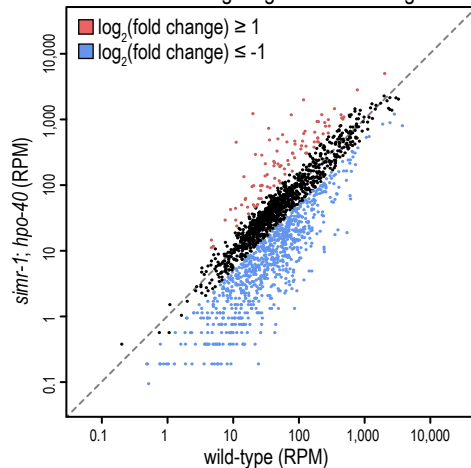

Supplement: supp [file elife_poa_e56731_Figure_2_figure_supplement_1.pdf › elife_poa_e56731_Figure_2_figure_supplement_1.pdf]
