# Supplementary material for: A tudor domain protein, SIMR-1, promotes siRNA production at piRNA-targeted mRNAs in C. elegans
Source: eLife. 2020 Apr 27;9:e56731. doi: 10.7554/eLife.56731 (PMC7255803; doi:10.7554/eLife.56731)
Supplement: Supplementary file 1. [file elife-56731-supp1.xlsx]

## Sheet: Germ granule components
Supplementary File 1. Known components of the L4 and adult germ granules.
P granule	Mutator Foci	Z Granule	SIMR Foci
ALG-3	MUT-2	WAGO-4	RSD-2
ALG-4	MUT-7	ZNFX-1	SIMR-1
CDE-1	MUT-14
CSR-1	MUT-15
DDX-19	MUT-16
DEPS-1	NYN-1
DRH-3	NYN-2
EGO-1	RDE-2
EKL-1	RDE-8
GLH-1	RRF-1
GLH-2	SMUT-1
GLH-3
GLH-4
LAF-1
PARN-1
PGL-1
PGL-2
PGL-3
PRG-1
RDE-12
VBH-1
WAGO-1
