# Supplementary material for: A tudor domain protein, SIMR-1, promotes siRNA production at piRNA-targeted mRNAs in C. elegans
Source: eLife. 2020 Apr 27;9:e56731. doi: 10.7554/eLife.56731 (PMC7255803; doi:10.7554/eLife.56731)
Supplement: Supplementary file 2. — Those examined further highlighted in blue. [file elife-56731-supp2.xlsx]

## Sheet: MUT-16 IP
Supplementary File 2. Proteins identified in MUT-16 IP. Those examined further highlighted in blue.
UniProt Reference	Gene Name	MUT-16 IP (GFP)		MUT-16 IP (FLAG)		Control IP (GFP)		Control IP (FLAG)
		Unique	Total	Unique	Total	Unique	Total	Unique	Total
O62011_CAEEL	mut-16	54	184	51	213	0	0	0	0
GFP_Aequorea	GFP	21	149	19	115	0	0	0	0
Q17978_CAEEL	mut-14	31	66	25	66	0	0	0	0
Q9UAX9_CAEEL	smut-1	25	45	26	55	0	0	0	0
O18125_CAEEL	nyn-1	19	37	15	21	0	0	0	0
O44768_CAEEL	mut-2	22	35	15	38	0	0	0	0
E1B6U1_CAEEL	mut-15	24	35	23	36	0	0	0	0
Q9NA28_CAEEL	nyn-2	14	34	14	21	0	0	0	0
Q23342_CAEEL	rde-8	18	30	11	19	0	0	0	0
Q93413_CAEEL	drh-3	23	25	19	22	0	0	0	0
G5ECM1_CAEEL	rrf-1	15	17	13	15	0	0	0	0
Q19731_CAEEL	ekl-1	11	12	13	16	0	0	0	0
F37C4_CAEEL	F37C4.5	2	2	10	13	0	0	0	0
Q22061_CAEEL	mut-15	3	3	3	4	0	0	0	0
6PGL_CAEEL	Y57G11C.3	5	6	2	3	0	0	0	0
Q19672_CAEEL	rde-2	3	3	3	3	0	0	0	0
Q93321_CAEEL	C33G3.6	3	3	2	2	0	0	0	0
O01477_CAEEL	C06A5.6	1	1	2	2	0	0	0	0
HGD_CAEEL	hgo-1	1	1	2	2	0	0	0	0
MUT7_CAEEL	mut-7	3	3	1	1	0	0	0	0
Q95ZV3_CAEEL	F13B9.1	7	7	0	0	0	0	0	0
Q9U3S5_CAEEL	mut-16	1	7	0	0	0	0	0	0
Q20966_CAEEL	F58B3.7	6	6	0	0	0	0	0	0
Q9NAP0_CAEEL	clec-190	3	5	0	0	0	0	0	0
PRP19_CAEEL	T10F2.4	4	5	0	0	0	0	0	0
NAS34_CAEEL	hch-1	4	4	0	0	0	0	0	0
Q9XVS4_CAEEL	dao-5	3	3	0	0	0	0	0	0
O17612_CAEEL	ech-1	3	3	0	0	0	0	0	0
O62481_CAEEL	lact-9	3	3	0	0	0	0	0	0
Q22137_CAEEL	T04A8.7	2	3	0	0	0	0	0	0
Q20203_CAEEL	csq-1	2	2	0	0	0	0	0	0
GOT1_CAEEL	F41C3.4	1	2	0	0	0	0	0	0
Q95YD1_CAEEL	gln-1	2	2	0	0	0	0	0	0
O16443_CAEEL	nhr-171	1	2	0	0	0	0	0	0
Q9N5K1_CAEEL	sacy-1	2	2	0	0	0	0	0	0
Q9UAZ2_CAEEL	Y49G5A.1	1	2	0	0	0	0	0	0
Q9XWS6_CAEEL	Y62H9A.5	1	2	0	0	0	0	0	0
Q95YB2_CAEEL	acdh-9	1	1	0	0	0	0	0	0
YKD1_CAEEL	B0464.2	1	1	0	0	0	0	0	0
O62032_CAEEL	C06C6.6	1	1	0	0	0	0	0	0
BUD31_CAEEL	C07A9.2	1	1	0	0	0	0	0	0
Q95YF1_CAEEL	C07H6.4	1	1	0	0	0	0	0	0
YQB6_CAEEL	C30G12.6	1	1	0	0	0	0	0	0
CATIN_CAEEL	cacn-1	1	1	0	0	0	0	0	0
K8F801_CAEEL	cdh-12	1	1	0	0	0	0	0	0
Q18937_CAEEL	cfim-2	1	1	0	0	0	0	0	0
Q20754_CAEEL	col-38	1	1	0	0	0	0	0	0
O62491_CAEEL	dct-12	1	1	0	0	0	0	0	0
A5Z2V7_CAEEL	F02E9.10	1	1	0	0	0	0	0	0
Q9N5U5_CAEEL	F35F11.1	1	1	0	0	0	0	0	0
O61947_CAEEL	grl-28	1	1	0	0	0	0	0	0
3HAO_CAEEL	haao-1	1	1	0	0	0	0	0	0
NH164_CAEEL	nhr-164	1	1	0	0	0	0	0	0
Q21810_CAEEL	R07E3.1	1	1	0	0	0	0	0	0
I2HAF0_CAEEL	T28D6.5	1	1	0	0	0	0	0	0
UNC33_CAEEL	unc-33	1	1	0	0	0	0	0	0
ATRX_CAEEL	xnp-1	1	1	0	0	0	0	0	0
D0FK02_CAEEL	Y116A8C.10	1	1	0	0	0	0	0	0
NEP1_CAEEL	Y39A1A.14	1	1	0	0	0	0	0	0
Q9N4I3_CAEEL	Y71F9AL.9	1	1	0	0	0	0	0	0
PGL1_CAEEL	pgl-1	0	0	9	11	0	0	0	0
O02297_CAEEL	sdz-30	0	0	11	11	0	0	0	0
SUR5_CAEEL	sur-5	0	0	7	7	0	0	0	0
G5EEV5_CAEEL	pud-3	0	0	4	6	0	0	0	0
Q21854_CAEEL	tag-147	0	0	6	6	0	0	0	0
Q9NA78_CAEEL	Y57A10A.23	0	0	5	6	0	0	0	0
Q22253_CAEEL	rpn-9	0	0	4	4	0	0	0	0
Q22966_CAEEL	clec-1	0	0	3	3	0	0	0	0
O45097_CAEEL	F57H12.6	0	0	3	3	0	0	0	0
RPAC2_CAEEL	F58A4.9	0	0	1	3	0	0	0	0
Q18447_CAEEL	hecd-1	0	0	3	3	0	0	0	0
O16313_CAEEL	hpo-9	0	0	3	3	0	0	0	0
B5BM24_CAEEL	ifg-1	0	0	3	3	0	0	0	0
MEL26_CAEEL	mel-26	0	0	2	3	0	0	0	0
Q9U2X0_CAEEL	prmt-1	0	0	2	3	0	0	0	0
Q95QB6_CAEEL	R151.2	0	0	3	3	0	0	0	0
PS11A_CAEEL	rpn-6.1	0	0	3	3	0	0	0	0
PSMD6_CAEEL	rpn-7	0	0	3	3	0	0	0	0
O61792_CAEEL	rpn-8	0	0	2	3	0	0	0	0
Q22088_CAEEL	T01H3.2	0	0	3	3	0	0	0	0
Q9N5A2_CAEEL	Y104H12D.2	0	0	3	3	0	0	0	0
Q8WQA0_CAEEL	Y105E8A.24	0	0	2	3	0	0	0	0
K8F7V7_CAEEL	W07E11.1	0	0	2	3	0	0	0	0
Q3V5I7_CAEEL	atg-5	0	0	2	2	0	0	0	0
Q93168_CAEEL	C01G10.8	0	0	2	2	0	0	0	0
OAT_CAEEL	C16A3.10	0	0	1	2	0	0	0	0
CGL2_CAEEL	cth-2	0	0	2	2	0	0	0	0
VINC_CAEEL	deb-1	0	0	2	2	0	0	0	0
G5EBQ3_CAEEL	ego-1	0	0	2	2	0	0	0	0
G5EFR3_CAEEL	F31C3.2	0	0	1	2	0	0	0	0
Q94207_CAEEL	F38A5.7	0	0	1	2	0	0	0	0
A6ZJ46_CAEEL	F49E2.2	0	0	1	2	0	0	0	0
Q20675_CAEEL	F52E4.5	0	0	2	2	0	0	0	0
SYG_CAEEL	grs-1	0	0	2	2	0	0	0	0
GST7_CAEEL	gst-7	0	0	1	2	0	0	0	0
Q8WTL6_CAEEL	hpo-29	0	0	2	2	0	0	0	0
Q93338_CAEEL	rpb-3	0	0	2	2	0	0	0	0
G5ED21_CAEEL	rpoa-1	0	0	2	2	0	0	0	0
O16386_CAEEL	sago-1	0	0	2	2	0	0	0	0
METK4_CAEEL	sams-4	0	0	2	2	0	0	0	0
METK5_CAEEL	sams-5	0	0	2	2	0	0	0	0
AGT2L_CAEEL	T01B11.2	0	0	2	2	0	0	0	0
VPS26_CAEEL	vps-26	0	0	1	2	0	0	0	0
Q7YTI8_CAEEL	Y57G11C.39	0	0	1	2	0	0	0	0
NACA_CAEEL	Y65B4BR.5	0	0	2	2	0	0	0	0
O01574_CAEEL	aman-3	0	0	1	1	0	0	0	0
ARP3_CAEEL	arx-1	0	0	1	1	0	0	0	0
Q9XW25_CAEEL	attf-6	0	0	1	1	0	0	0	0
Q17432_CAEEL	B0035.3	0	0	1	1	0	0	0	0
BAT40_CAEEL	bath-40	0	0	1	1	0	0	0	0
Q9XWH0_CAEEL	bub-3	0	0	1	1	0	0	0	0
Q9XVF1_CAEEL	C04F12.1	0	0	1	1	0	0	0	0
Q17832_CAEEL	C08H9.2	0	0	1	1	0	0	0	0
O61799_CAEEL	C33E10.10	0	0	1	1	0	0	0	0
Q18437_CAEEL	C34D10.2	0	0	1	1	0	0	0	0
Q18865_CAEEL	C55C3.4	0	0	1	1	0	0	0	0
O45502_CAEEL	dnj-12	0	0	1	1	0	0	0	0
EF2K_CAEEL	efk-1	0	0	1	1	0	0	0	0
Q22528_CAEEL	ekl-6	0	0	1	1	0	0	0	0
G5ECR7_CAEEL	elb-1	0	0	1	1	0	0	0	0
Q22950_CAEEL	F08F3.9	0	0	1	1	0	0	0	0
P90830_CAEEL	F10C2.5	0	0	1	1	0	0	0	0
PAL_CAEEL	F21F3.1	0	0	1	1	0	0	0	0
Q9TXI4_CAEEL	F23C8.5	0	0	1	1	0	0	0	0
Q20034_CAEEL	F35D11.4	0	0	1	1	0	0	0	0
C0Z1Y9_CAEEL	F40G9.17	0	0	1	1	0	0	0	0
Q8MQ42_CAEEL	F46H5.7	0	0	1	1	0	0	0	0
O01789_CAEEL	him-1	0	0	1	1	0	0	0	0
NUF2_CAEEL	him-10	0	0	1	1	0	0	0	0
SYIC_CAEEL	irs-1	0	0	1	1	0	0	0	0
G5ED63_CAEEL	K12D12.5	0	0	1	1	0	0	0	0
G5EBW6_CAEEL	lea-1	0	0	1	1	0	0	0	0
Q20937_CAEEL	let-711	0	0	1	1	0	0	0	0
O18188_CAEEL	maea-1	0	0	1	1	0	0	0	0
G5EBV6_CAEEL	pgl-3	0	0	1	1	0	0	0	0
Q8IG64_CAEEL	ppw-1	0	0	1	1	0	0	0	0
TDX1_CAEEL	prdx-3	0	0	1	1	0	0	0	0
TOP2M_CAEEL	R05D3.12	0	0	1	1	0	0	0	0
Q9BI73_CAEEL	R151.2	0	0	1	1	0	0	0	0
DHX9_CAEEL	rha-1	0	0	1	1	0	0	0	0
Q27492_CAEEL	rpc-2	0	0	1	1	0	0	0	0
O45226_CAEEL	rpl-29	0	0	1	1	0	0	0	0
G5EC16_CAEEL	smn-1	0	0	1	1	0	0	0	0
SODM1_CAEEL	sod-2	0	0	1	1	0	0	0	0
SPT5H_CAEEL	spt-5	0	0	1	1	0	0	0	0
Q22453_CAEEL	ssup-72	0	0	1	1	0	0	0	0
H2KZV7_CAEEL	T04C9.1	0	0	1	1	0	0	0	0
O45783_CAEEL	T12D8.5	0	0	1	1	0	0	0	0
LTV1_CAEEL	T23D8.3	0	0	1	1	0	0	0	0
O62275_CAEEL	wago-4	0	0	1	1	0	0	0	0
H2KZ41_CAEEL	Y110A7A.15	0	0	1	1	0	0	0	0
Q95XG0_CAEEL	Y73B3A.10	0	0	1	1	0	0	0	0
Q9XUE3_CAEEL	rsd-2	33	42	26	32	0	0	2	2
GCC7_CAEEL	wago-1	12	14	13	14	0	0	3	3
UBP7_CAEEL	usp-7/math-33	10	11	9	11	0	0	1	1
B3KLZ7_CAEEL	ppw-1	6	6	18	19	0	0	7	8
Q9TZS5_CAEEL	cct-7	3	4	10	13	0	0	4	4
Q9XWZ2_CAEEL	acdh-11	1	2	1	1	0	0	1	1
Q19007_CAEEL	nap-1	2	2	10	13	0	0	5	5
Q9GZI3_CAEEL	pod-2	2	2	24	31	0	0	12	16
Q95QM8_CAEEL	F07A11.2	1	1	7	8	0	0	3	3
TCPB_CAEEL	cct-2	1	1	17	24	0	0	4	4
G5EFY6_CAEEL	sec-31	8	10	1	1	3	3	0	0
Q9GUF2_CAEEL	acp-6	3	4	3	3	2	2	0	0
Q95XR0_CAEEL	Y39G10AR.8	1	2	3	4	1	1	0	0
O16202_CAEEL	lys-7	1	1	1	2	1	1	0	0
Q1XFY9_CAEEL	rps-24	1	1	4	6	2	3	0	0
Q9XW17_CAEEL	car-1	9	27	10	12	7	9	8	9
CSK2B_CAEEL	kin-10	7	9	4	6	4	4	3	3
RL40_CAEEL	ubq-2	6	9	4	11	2	3	4	6
SIP1_CAEEL	sip-1	5	5	9	12	3	3	4	4
Q93716_CAEEL	cfim-1	3	3	3	4	1	1	2	2
Q20048_CAEEL	mlcd-1	9	9	0	0	1	1	0	0
Q9N3S3_CAEEL	rnp-6	8	9	0	0	3	3	0	0
ANC1_CAEEL	anc-1	5	6	0	0	1	1	0	0
Q9N3S4_CAEEL	rnp-6	6	6	0	0	1	1	0	0
Q23604_CAEEL	ZK813.3	4	5	0	0	2	2	0	0
ACLY_CAEEL	D1005.1	0	0	31	32	0	0	10	10
TCPD_CAEEL	cct-4	0	0	17	23	1	1	3	3
TCPE_CAEEL	cct-5	0	0	17	22	0	0	4	4
NPRL3_CAEEL	F35H10.7	0	0	12	15	0	0	7	7
ALH13_CAEEL	alh-13	0	0	8	9	0	0	3	3
CDK1_CAEEL	cdk-1	0	0	8	9	0	0	4	4
G5ED07_CAEEL	pdi-3	0	0	5	6	0	0	2	2
G5ED41_CAEEL	cand-1	0	0	4	5	0	0	2	2
COPG_CAEEL	T14G10.5	0	0	4	5	0	0	2	2
Q86S77_CAEEL	nuo-5	0	0	2	3	0	0	1	1
Q69ZI6_CAEEL	T12D8.10	0	0	2	3	0	0	1	1
Q22945_CAEEL	F08F3.4	0	0	3	3	0	0	1	1
P91522_CAEEL	fbxa-64	0	0	3	3	0	0	1	1
Q9U2G4_CAEEL	puf-3	0	0	3	3	0	0	1	1
Q22792_CAEEL	T25G3.3	0	0	3	3	0	0	1	1
KINH_CAEEL	unc-116	0	0	3	3	0	0	1	1
Q9N590_CAEEL	Y110A7A.6	0	0	3	3	0	0	1	1
MYO4_CAEEL	unc-54	46	53	25	29	56	67	32	39
ODO1_CAEEL	T22B11.5	30	42	2	2	33	51	5	7
ACT1_CAEEL	act-1	19	37	13	21	19	35	14	31
HSP7A_CAEEL	hsp-1	21	31	25	34	19	23	24	32
O45148_CAEEL	dlst-1	16	29	6	7	14	27	7	9
EF1A_CAEEL	eft-3	12	27	16	43	11	26	14	35
IgG1_bovine		6	23	0	0	6	25	0	0
CSK2A_CAEEL	kin-3	16	22	14	25	12	14	11	14
MYSP_CAEEL	unc-15	20	22	9	9	26	31	18	18
DHTK1_CAEEL	ZK836.2	18	21	8	10	25	31	11	14
O45599_CAEEL	cbd-1	16	21	0	0	11	13	0	0
ATPB_CAEEL	atp-2	17	20	19	24	24	35	21	33
TBB2_CAEEL	tbb-2	15	20	16	28	12	16	14	20
HSP90_CAEEL	daf-21	17	19	25	32	17	19	22	27
O44145_CAEEL	perm-2	3	18	3	4	4	13	0	0
Q09657_CAEEL	ZK1320.9	11	17	7	8	7	10	8	10
O44144_CAEEL	perm-4	6	17	3	5	6	12	3	17
G5EDE8_CAEEL	ile-1	12	17	1	1	14	18	6	8
IgG1b_bovine		3	17	0	0	3	20	0	0
VIT6_CAEEL	vit-6	16	16	31	33	25	27	33	41
TPM1_CAEEL	lev-11	13	16	5	6	14	16	11	19
PYC1_CAEEL	pyc-1	14	15	23	26	11	12	21	25
RL5_CAEEL	rpl-5	11	15	17	35	11	12	17	30
RS3_CAEEL	rps-3	12	15	16	24	13	17	19	34
GBLP_CAEEL	rack-1	11	15	11	16	12	17	12	16
G3P1_CAEEL	gpd-1	11	14	6	6	9	9	9	12
Q17740_CAEEL	ain-1	11	14	0	0	11	12	0	0
EF2_CAEEL	eef-2	13	13	26	32	14	16	23	25
GST36_CAEEL	gst-36	12	13	0	0	11	13	0	0
Q18943_CAEEL	D1054.10	7	13	0	0	7	11	0	0
EIF3A_CAEEL	egl-45	10	12	19	19	17	18	10	10
RS4_CAEEL	rps-4	10	12	17	32	10	12	14	28
ATPA_CAEEL	H28O16.1	10	12	15	20	12	16	17	25
TBA2_CAEEL	tba-2	10	12	13	24	12	14	14	20
RSSA_CAEEL	rps-0	8	12	10	16	7	9	10	15
VIT1_CAEEL	vit-1	10	11	49	55	17	18	49	60
IF4A_CAEEL	inf-1	9	11	16	21	10	11	15	20
O02286_CAEEL	pck-2	10	11	15	18	7	7	14	17
IgG2a_bovine		7	11	0	0	5	9	0	0
TBB1_CAEEL	mec-7	8	10	12	26	5	7	11	33
O45815_CAEEL	act-5	6	10	5	5	6	10	5	7
Q93619_CAEEL	tag-173	6	10	3	4	5	7	3	3
RL4_CAEEL	rpl-4	8	9	19	24	7	9	16	19
Q18599_CAEEL	C44B7.10	8	9	13	16	8	9	10	14
P91306_CAEEL	cey-2	9	9	12	16	7	8	12	29
UNC87_CAEEL	unc-87	8	9	9	10	13	15	17	17
Q7K797_CAEEL	pab-1	7	9	8	16	9	10	7	9
Q19989_CAEEL	F33G12.5	8	9	0	0	9	9	0	0
CLH_CAEEL	chc-1	8	8	44	54	3	4	39	50
VATA_CAEEL	vha-13	7	8	14	16	12	13	13	14
VIT2_CAEEL	vit-2	7	8	14	15	9	10	16	20
DHSA_CAEEL	sdha-1	6	8	13	18	8	8	15	17
Q23621_CAEEL	gdh-1	8	8	11	11	10	11	12	12
P91398_CAEEL	cey-3	7	8	9	9	6	9	9	11
Q22847_CAEEL	T28C6.7	8	8	4	4	0	0	10	11
SEC13_CAEEL	npp-20	7	8	3	3	3	3	3	3
Q17796_CAEEL	hgrs-1	8	8	0	0	8	8	0	0
RS3A_CAEEL	rps-1	7	7	10	11	9	10	10	12
GLH1_CAEEL	glh-1	6	7	9	12	7	8	5	5
G5ECM6_CAEEL	tufm-1	7	7	8	10	6	6	7	7
EIF3B_CAEEL	eif-3.B	7	7	7	8	15	16	6	7
Q19579_CAEEL	pab-2	6	7	7	7	4	6	6	7
G5EGR6_CAEEL	alg-1	7	7	4	4	10	10	0	0
ROA1_CAEEL	hrp-1	7	7	3	3	8	12	6	6
EIF3D_CAEEL	eif-3.D	6	7	3	4	9	9	4	4
O62486_CAEEL	nos-3	5	7	0	0	6	8	0	0
IgG3_bovine		5	7	0	0	4	7	0	0
Q9N5U1_CAEEL	T22F3.3	6	6	18	19	10	10	24	27
RL7_CAEEL	rpl-7	5	6	15	20	4	5	14	20
CGH1_CAEEL	cgh-1	6	6	12	13	4	4	9	11
RLA0_CAEEL	rpa-0	6	6	9	18	7	8	8	17
DIM_CAEEL	dim-1	6	6	9	10	8	8	7	8
G5EFW8_CAEEL	ant-1.3	6	6	8	11	4	4	9	15
RL6_CAEEL	rpl-6	6	6	7	9	6	6	7	8
RS8_CAEEL	rps-8	6	6	6	8	5	5	6	7
RL11_CAEEL	rpl-11.1	5	6	5	8	3	4	4	8
Q21742_CAEEL	R05F9.6	3	6	3	3	3	4	2	3
G5EEH6_CAEEL	ivd-1	6	6	2	2	6	6	4	5
G5EEI4_CAEEL	asp-1	5	6	2	2	5	5	1	1
MYO3_CAEEL	myo-3	5	6	1	1	12	12	8	8
STNB_CAEEL	unc-41	6	6	0	0	9	10	0	0
G5ED29_CAEEL	atx-2	4	6	0	0	6	7	0	0
Q9U1Z4_CAEEL	Y60A3A.9	5	6	0	0	7	7	0	0
Q18947_CAEEL	D1054.11	3	6	0	0	3	6	0	0
Q95Q06_CAEEL	Y66D12A.8	4	6	0	0	3	4	0	0
O18240_CAEEL	rps-18	5	5	11	13	6	6	10	13
P90897_CAEEL	F58G11.2	5	5	11	12	6	6	9	10
O45734_CAEEL	cpl-1	5	5	8	10	6	7	8	15
HSP7C_CAEEL	hsp-3	5	5	8	10	5	6	15	19
Q23571_CAEEL	ZK669.4	4	5	8	10	4	6	9	12
RS16_CAEEL	rps-16	5	5	7	8	6	7	7	7
RS2_CAEEL	rps-2	5	5	7	8	6	6	9	10
IDH3A_CAEEL	F43G9.1	4	5	7	10	5	6	4	4
RL18_CAEEL	rpl-18	5	5	7	11	4	4	7	13
Q8MXR6_CAEEL	sqd-1	4	5	5	6	7	8	5	5
UCR1_CAEEL	ucr-1	5	5	4	4	9	9	11	12
EIF3L_CAEEL	eif-3.L	5	5	4	4	9	9	4	5
EIF3I_CAEEL	eif-3.I	4	5	4	5	6	6	6	6
H2KZG6_CAEEL	acdh-1	5	5	4	4	4	4	6	6
B7WNA0_CAEEL	pyk-1	4	5	4	4	1	2	8	8
Q9N384_CAEEL	lec-6	3	5	3	4	4	6	2	3
Q20546_CAEEL	F47G9.1	5	5	0	0	7	9	0	0
Q21471_CAEEL	clec-265	4	5	0	0	4	6	0	0
H2L2J6_CAEEL	pqn-27	5	5	0	0	6	6	0	0
TMED2_CAEEL	sel-9	4	5	0	0	4	6	0	0
Q9N3Y1_CAEEL	Y42H9AR.1	5	5	0	0	6	6	0	0
Q9XWT3_CAEEL	Y62H9A.6	5	5	0	0	5	5	0	0
SURF4_CAEEL	sft-4	5	5	0	0	4	4	1	1
TCPQ_CAEEL	cct-8	3	4	19	24	3	3	10	11
O44906_CAEEL	pck-1	4	4	14	16	3	3	11	12
Q27GU1_CAEEL	csr-1	4	4	13	14	4	4	10	10
O45865_CAEEL	ant-1.1	2	4	9	16	2	2	10	18
RL35A_CAEEL	rpl-33	4	4	7	8	5	5	9	11
G3P2_CAEEL	gpd-2	4	4	6	6	2	2	5	6
MLR1_CAEEL	mlc-1	4	4	5	5	3	4	5	5
RL19_CAEEL	rpl-19	4	4	5	7	3	3	5	6
Q9GYT0_CAEEL	T08B2.7	4	4	4	5	7	7	4	4
HOT_CAEEL	Y38F1A.6	3	4	4	5	2	2	3	3
Q65XX1_CAEEL	vbh-1	4	4	3	3	10	11	4	4
O16303_CAEEL	dnj-19	4	4	3	3	5	6	0	0
RS17_CAEEL	rps-17	3	4	3	4	3	4	3	4
G5EEK8_CAEEL	sca-1	3	4	3	3	3	3	10	10
RL22_CAEEL	rpl-22	3	4	3	4	3	3	3	3
3HIDH_CAEEL	B0250.5	4	4	3	3	2	2	3	3
RAN_CAEEL	ran-1	4	4	2	3	5	6	5	7
Q86CZ9_CAEEL	ant-1.1	3	4	2	3	2	3	3	4
H2L2E8_CAEEL	tba-1	3	4	2	4	1	2	2	4
LEC1_CAEEL	lec-1	4	4	1	1	4	4	4	5
CYP10_CAEEL	cyn-10	3	4	0	0	6	7	0	0
Q9UAQ6_CAEEL	rab-1	3	4	0	0	3	3	1	1
Q18990_CAEEL	pyr-1	2	3	34	39	0	0	20	23
Q8IG31_CAEEL	prdx-2	3	3	11	14	4	4	7	11
RS9_CAEEL	rps-9	2	3	10	11	4	4	11	13
O45012_CAEEL	nol-5	3	3	9	12	3	5	11	11
TERA1_CAEEL	cdc-48.1	3	3	9	12	4	4	13	13
YZVL_CAEEL	K07C5.4	2	3	9	10	2	2	11	13
SUCB1_CAEEL	F47B10.1	3	3	9	9	2	2	6	6
RS14_CAEEL	rps-14	3	3	8	12	2	2	7	12
RL7A_CAEEL	rpl-7A	3	3	7	26	2	3	11	17
RL13_CAEEL	rpl-13	3	3	7	10	3	3	6	9
RL9_CAEEL	rpl-9	3	3	7	10	1	1	6	7
KC1A_CAEEL	kin-19	3	3	7	9	0	0	7	9
O45552_CAEEL	F53A2.7	3	3	6	6	6	7	6	8
Q94230_CAEEL	plp-1	3	3	6	7	1	1	8	8
RL13A_CAEEL	rpl-16	3	3	5	9	3	3	5	7
LDH_CAEEL	ldh-1	3	3	5	5	2	3	6	6
RL10_CAEEL	rpl-10	3	3	5	5	3	3	4	4
H2KYV9_CAEEL	ppw-1	3	3	5	5	1	1	3	3
MYO1_CAEEL	let-75	3	3	4	5	9	10	4	4
RL21_CAEEL	rpl-21	3	3	4	5	3	4	6	6
RS7_CAEEL	rps-7	3	3	4	5	4	4	5	5
RL23_CAEEL	rpl-23	3	3	4	8	2	2	2	7
EIF3G_CAEEL	eif-3.G	3	3	3	3	5	5	4	4
IFB1_CAEEL	ifb-1	3	3	3	3	0	0	9	9
O62415_CAEEL	lys-1	3	3	2	2	4	7	1	1
RS25_CAEEL	rps-25	2	3	2	5	2	3	4	7
Q9BKU3_CAEEL	Y37E3.10	3	3	2	2	3	3	4	4
RS15_CAEEL	rps-15	3	3	1	1	2	2	2	2
VDAC_CAEEL	R05G6.7	3	3	1	1	1	1	2	2
MYO2_CAEEL	myo-2	3	3	0	0	6	6	2	4
CHIT_CAEEL	cht-1	3	3	0	0	6	6	0	0
Q95R18_CAEEL	ain-2	3	3	0	0	3	5	1	2
Q9N3D0_CAEEL	Y54E10BR.5	1	3	0	0	1	4	0	0
IGHG_RABIT		2	3	0	0	2	4	0	0
Q09975_CAEEL	lys-8	2	3	0	0	2	2	0	0
CH60_CAEEL	hsp-60	2	2	38	94	2	2	34	94
VIT3_CAEEL	vit-3	2	2	26	29	0	0	47	56
G5EFG4_CAEEL	abcf-2	2	2	22	23	1	1	18	19
PCCA_CAEEL	pcca-1	2	2	20	21	4	4	13	14
G5EBT9_CAEEL	H27A22.1	2	2	15	44	4	4	13	38
SAHH_CAEEL	ahcy-1	1	2	13	14	9	9	14	18
Q19699_CAEEL	F22B3.4	2	2	11	13	1	1	9	13
G5EDV3_CAEEL	cey-4	2	2	10	10	3	3	8	10
PRS7_CAEEL	rpt-1	2	2	10	12	1	1	13	15
RL18A_CAEEL	rpl-20	2	2	9	13	3	3	9	15
ATAD3_CAEEL	atad-3	2	2	8	9	3	4	9	10
MCM5_CAEEL	mcm-5	1	2	8	8	0	0	13	14
O76371_CAEEL	rpt-5	2	2	7	9	3	3	6	7
SYDC_CAEEL	drs-1	2	2	7	7	2	2	8	36
VATB_CAEEL	vha-12	2	2	6	7	4	4	8	12
Q95XJ0_CAEEL	Y69A2AR.18	2	2	6	9	3	3	10	12
R23A2_CAEEL	rpl-25.2	2	2	6	10	2	3	4	10
RL8_CAEEL	rpl-8	2	2	6	7	2	2	7	8
RL10A_CAEEL	rpl-10a	2	2	6	6	2	2	6	7
O17953_CAEEL	dld-1	2	2	5	6	2	2	2	3
G5EEU7_CAEEL	rme-1	2	2	5	6	1	1	6	6
O01869_CAEEL	rps-10	2	2	4	4	2	3	3	3
RS6_CAEEL	rps-6	2	2	4	13	2	2	7	7
Q9XVE9_CAEEL	rpl-14	2	2	4	5	2	2	3	5
Q19680_CAEEL	F21D5.1	2	2	4	4	1	1	7	8
O44954_CAEEL	sdha-2	2	2	4	4	1	1	6	7
RL12_CAEEL	rpl-12	2	2	4	5	1	1	3	4
GYS_CAEEL	gsy-1	2	2	4	4	1	1	2	2
B7WN95_CAEEL	rpl-32	2	2	4	5	0	0	2	4
PHB1_CAEEL	phb-1	2	2	3	3	1	1	5	6
R23A1_CAEEL	rpl-25.1	2	2	3	3	1	1	6	6
A3QMC5_CAEEL	rpl-34	2	2	3	4	1	1	2	4
O17921_CAEEL	tbb-1	2	2	3	3	1	1	2	2
DKC1_CAEEL	K01G5.5	2	2	3	3	0	0	9	16
DHSB_CAEEL	sdhb-1	2	2	3	3	0	0	4	5
MMSA_CAEEL	alh-8	2	2	2	3	4	4	3	4
Q7K798_CAEEL	pab-1	2	2	2	2	3	4	2	2
RS28_CAEEL	rps-28	2	2	2	3	2	2	1	1
IF2B_CAEEL	K04G2.1	1	2	2	2	1	1	2	2
PRP8_CAEEL	prp-8	2	2	2	2	0	0	10	11
KAPR_CAEEL	kin-2	1	2	2	2	0	0	2	2
ODP2_CAEEL	F23B12.5	2	2	1	1	2	3	4	4
G5EGB1_CAEEL	lec-2	2	2	0	0	3	3	2	3
Q22961_CAEEL	F25B4.5	2	2	0	0	2	3	0	0
Q22972_CAEEL	F28A12.4	1	2	0	0	2	3	0	0
Q18921_CAEEL	snap-1	2	2	0	0	2	2	0	0
GAR1_CAEEL	Y66H1A.4	2	2	0	0	2	2	0	0
Q20913_CAEEL	yif-1	2	2	0	0	2	2	0	0
U2AF2_CAEEL	uaf-1	2	2	0	0	1	1	2	2
ARF12_CAEEL	arf-1.2	2	2	0	0	1	1	0	0
O61880_CAEEL	F59B1.2	2	2	0	0	1	1	0	0
H2L276_CAEEL	grsp-2	1	2	0	0	1	1	0	0
RS27_CAEEL	rps-27	1	2	0	0	1	1	0	0
STX3_CAEEL	syn-3	2	2	0	0	1	1	0	0
TBA3_CAEEL	mec-12	2	2	0	0	0	0	2	2
Q9N4H7_CAEEL	Y71F9AL.17	1	1	31	40	0	0	29	35
H2KZS2_CAEEL	T23E7.2	1	1	12	13	3	3	14	20
PRS10_CAEEL	rpt-4	1	1	11	12	0	0	8	9
Q95YD8_CAEEL	idhg-2	1	1	11	12	0	0	7	8
14331_CAEEL	par-5	1	1	9	15	2	2	7	11
Q22993_CAEEL	pmt-2	1	1	9	11	1	1	9	13
Q20121_CAEEL	acs-4	1	1	9	10	1	1	9	9
TCTP_CAEEL	tct-1	1	1	8	11	0	0	5	7
VATH2_CAEEL	vha-15	1	1	7	7	1	1	7	7
PRS6B_CAEEL	rpt-3	1	1	7	8	1	1	6	6
ACON_CAEEL	aco-2	1	1	6	10	5	5	6	10
Q65ZK5_CAEEL	pars-1	1	1	6	6	1	1	5	5
Q22508_CAEEL	tag-18	1	1	6	6	1	1	5	5
PRS4_CAEEL	rpt-2	1	1	5	6	2	2	10	10
ALF2_CAEEL	aldo-2	1	1	5	5	0	0	7	7
CATA2_CAEEL	ctl-1	1	1	5	5	0	0	4	4
Q17763_CAEEL	atp-5	1	1	4	4	4	4	4	4
RL17_CAEEL	rpl-17	1	1	4	5	1	1	6	7
A8WIR1_CAEEL	rps-22	1	1	4	5	1	1	4	5
RL24_CAEEL	rpl-24.1	1	1	4	5	1	1	3	4
COPD_CAEEL	C13B9.3	1	1	4	5	0	0	3	3
Q23050_CAEEL	T25F10.6	1	1	3	3	4	4	6	8
K8FE02_CAEEL	imph-1	1	1	3	4	3	3	3	3
IF5A1_CAEEL	iff-1	1	1	3	4	2	2	3	5
VIT4_CAEEL	vit-4	1	1	3	3	1	1	4	7
RL28_CAEEL	rpl-28	1	1	3	3	1	1	2	2
YKA3_CAEEL	B0303.3	1	1	3	3	0	0	4	4
Q8WQA8_CAEEL	rps-20	1	1	2	2	3	3	2	3
ODPB_CAEEL	C04C3.3	1	1	2	3	2	2	3	3
RL36_CAEEL	rpl-36	1	1	2	2	2	2	3	3
RLA2_CAEEL	rpa-2	1	1	2	3	1	2	2	2
P90735_CAEEL	eat-6	1	1	2	2	1	1	17	18
RS23_CAEEL	rps-23	1	1	2	3	1	1	3	4
RL26_CAEEL	rpl-26	1	1	2	2	1	1	2	2
RS21_CAEEL	rps-21	1	1	2	2	1	1	2	2
RS26_CAEEL	rps-26	1	1	2	2	1	1	2	2
MECR1_CAEEL	W09H1.5	1	1	2	2	0	0	3	3
RL31_CAEEL	rpl-31	1	1	2	3	0	0	2	2
TERA2_CAEEL	cdc-48.2	1	1	2	2	0	0	1	2
PSA5_CAEEL	pas-5	1	1	2	2	0	0	2	2
RL35_CAEEL	rpl-35	1	1	2	2	0	0	2	2
O61793_CAEEL	R12E2.13	1	1	1	1	2	2	2	2
Q8IG50_CAEEL	tiar-1	1	1	1	1	2	2	1	1
MS152_CAEEL	msp-152	1	1	1	1	1	1	2	3
Q20306_CAEEL	abcf-3	1	1	1	1	1	1	1	2
RU2A_CAEEL	sap-1	1	1	1	1	1	1	1	2
Q20660_CAEEL	hsp-17	1	1	1	1	1	1	1	1
Q21541_CAEEL	M142.5	1	1	1	1	1	1	1	1
STAM1_CAEEL	stam-1	1	1	1	1	1	1	1	1
VATL2_CAEEL	vha-2	1	1	1	1	1	1	1	1
H2L2H3_CAEEL	glna-1	1	1	1	1	0	0	7	7
Q22308_CAEEL	ddx-19	1	1	1	1	0	0	1	2
I2HA91_CAEEL	F28C6.8	1	1	1	1	0	0	1	1
Q7Z071_CAEEL	tnt-2	1	1	0	0	3	4	1	1
TNNT_CAEEL	mup-2	1	1	0	0	4	4	0	0
RS12_CAEEL	rps-12	1	1	0	0	2	2	1	2
UGDH_CAEEL	sqv-4	1	1	0	0	1	1	1	1
Q21966_CAEEL	asp-4	1	1	0	0	1	1	0	0
COL8_CAEEL	col-8	1	1	0	0	1	1	0	0
CYP3_CAEEL	cyn-3	1	1	0	0	1	1	0	0
Q69YZ0_CAEEL	pqn-83	1	1	0	0	1	1	0	0
Q94050_CAEEL	sna-2	1	1	0	0	1	1	0	0
P91873_CAEEL	tba-6	1	1	0	0	1	1	0	0
Q95XY1_CAEEL	vbh-1	1	1	0	0	1	1	0	0
IFA4_CAEEL	ifa-4	1	1	0	0	0	0	2	2
O61708_CAEEL	pqn-59	1	1	0	0	0	0	2	2
DX39B_CAEEL	hel-1	1	1	0	0	0	0	1	1
Q2EEM5_CAEEL	uso-1	1	1	0	0	0	0	1	1
O61201_CAEEL	F39C12.1	0	0	82	98	0	0	86	103
A5Z2S3_CAEEL	F54B3.1	0	0	70	79	0	0	46	51
Q9N533_CAEEL	Y32H12A.8	0	0	60	66	0	0	68	76
H2L074_CAEEL	ketn-1	0	0	52	60	6	7	57	65
Q19866_CAEEL	suf-1	0	0	45	113	0	0	45	101
H2L0N9_CAEEL	Y37E3.17	0	0	42	68	0	0	35	53
O76447_CAEEL	hcp-1	0	0	40	48	0	0	44	54
Q21962_CAEEL	R12C12.1	0	0	38	96	2	2	37	106
RENT1_CAEEL	smg-2	0	0	36	52	0	0	32	53
P91453_CAEEL	T19B4.5	0	0	27	77	0	0	30	88
Q53U86_CAEEL	sax-7	0	0	27	39	0	0	32	47
O16266_CAEEL	F40A3.6	0	0	25	81	0	0	23	122
Q19864_CAEEL	cpf-1	0	0	22	156	0	0	20	200
G5ED04_CAEEL	F22G12.1	0	0	21	36	0	0	19	32
Q20476_CAEEL	F46G10.1	0	0	19	34	1	1	18	66
Q9GZH5_CAEEL	rpn-1	0	0	19	21	1	1	19	26
COPB2_CAEEL	F38E11.5	0	0	19	21	0	0	21	26
TCPA_CAEEL	cct-1	0	0	18	21	0	0	11	12
Q22624_CAEEL	T21B10.3	0	0	16	19	0	0	16	20
CPSF1_CAEEL	cpsf-1	0	0	16	17	0	0	16	18
G5EFM7_CAEEL	F18C12.3	0	0	16	19	0	0	14	17
Q9N4J8_CAEEL	cct-3	0	0	16	18	0	0	10	11
G4S034_CAEEL	spc-1	0	0	15	18	1	1	42	48
Q9TYL9_CAEEL	copb-1	0	0	15	20	1	1	14	15
Q8WQD8_CAEEL	cah-4	0	0	15	135	0	0	15	132
PDE6_CAEEL	pde-6	0	0	15	20	0	0	25	38
O44191_CAEEL	rme-2	0	0	15	24	0	0	12	23
GLNA_CAEEL	gln-2	0	0	15	20	0	0	17	22
G5EBK0_CAEEL	T08A11.1	0	0	15	19	0	0	10	11
GLS1_CAEEL	gls-1	0	0	14	19	1	1	13	19
TCPZ_CAEEL	cct-6	0	0	14	18	1	1	8	10
SIR41_CAEEL	sir-2.2	0	0	14	29	0	0	14	29
G5EF53_CAEEL	swsn-4	0	0	14	17	0	0	21	26
YP83_CAEEL	C08B11.3	0	0	14	19	0	0	15	20
G5EF87_CAEEL	swsn-1	0	0	14	18	0	0	14	19
G5ECZ1_CAEEL	unc-44	0	0	12	14	0	0	30	35
Q17948_CAEEL	pptr-2	0	0	12	16	0	0	16	21
2AAA_CAEEL	paa-1	0	0	12	15	0	0	11	11
D0PV95_CAEEL	laf-1	0	0	11	12	6	6	11	15
Q8WQF1_CAEEL	pccb-1	0	0	11	12	3	3	13	15
MPCP_CAEEL	F01G4.6	0	0	11	16	0	0	9	15
PSMD1_CAEEL	rpn-2	0	0	11	11	0	0	11	12
FBRL_CAEEL	fib-1	0	0	10	13	3	3	10	15
P91871_CAEEL	fasn-1	0	0	10	10	0	0	19	20
RL3_CAEEL	rpl-3	0	0	10	12	0	0	13	19
Q9TZD9_CAEEL	haf-4	0	0	9	9	0	0	14	16
SEH1_CAEEL	npp-18	0	0	9	11	0	0	9	14
PICA_CAEEL	unc-11	0	0	9	11	0	0	8	10
CTU1_CAEEL	tut-1	0	0	9	11	0	0	8	9
YP93_CAEEL	C28H8.3	0	0	9	10	0	0	8	9
Q9TXR4_CAEEL	msh-2	0	0	9	9	0	0	9	9
METK3_CAEEL	sams-3	0	0	9	14	0	0	6	7
Q19101_CAEEL	F01G12.6	0	0	9	10	0	0	6	7
CPSF2_CAEEL	cpsf-2	0	0	9	9	0	0	5	5
PDI2_CAEEL	pdi-2	0	0	9	9	0	0	5	5
H2L0M6_CAEEL	T25F10.6	0	0	8	8	4	4	12	14
KARG1_CAEEL	F46H5.3	0	0	8	10	2	2	5	5
G5EGK8_CAEEL	let-92	0	0	8	10	0	0	8	11
YBYK_CAEEL	C32E8.3	0	0	8	9	0	0	7	10
IDH3B_CAEEL	C37E2.1	0	0	8	9	0	0	8	8
Q9BL39_CAEEL	swsn-3	0	0	8	8	0	0	7	7
PSMD3_CAEEL	rpn-3	0	0	8	8	0	0	5	6
H2KYR1_CAEEL	vig-1	0	0	7	7	1	2	7	7
Q9XXI9_CAEEL	mcm-2	0	0	7	9	1	1	10	11
RS13_CAEEL	rps-13	0	0	7	7	1	1	7	8
YSI1_CAEEL	F15G9.1	0	0	7	7	0	0	17	23
G5EEY5_CAEEL	pbrm-1	0	0	7	11	0	0	15	16
GSK3_CAEEL	gsk-3	0	0	7	9	0	0	9	14
G5EBV4_CAEEL	lec-10	0	0	7	12	0	0	7	11
CLU_CAEEL	clu-1	0	0	7	8	0	0	9	11
Q9U367_CAEEL	T16G1.9	0	0	7	8	0	0	8	11
G5EFF8_CAEEL	C30H7.2	0	0	7	8	0	0	9	9
Q20633_CAEEL	nprl-2	0	0	7	7	0	0	8	9
A5JYT2_CAEEL	swsn-9	0	0	7	8	0	0	8	8
Q965W8_CAEEL	Y39H10A.6	0	0	7	8	0	0	7	8
Q9N4A5_CAEEL	Y77E11A.1	0	0	7	8	0	0	7	8
TXNDL_CAEEL	C06A6.5	0	0	7	11	0	0	6	7
PLBL2_CAEEL	F09B12.3	0	0	7	10	0	0	7	7
G5EDF7_CAEEL	sek-1	0	0	7	7	0	0	5	6
METK1_CAEEL	sams-1	0	0	7	7	0	0	5	5
G5ED26_CAEEL	mel-46	0	0	7	8	0	0	4	4
Q7KQ29_CAEEL	pod-2	0	0	7	8	0	0	3	4
YUW5_CAEEL	F41C3.5	0	0	7	7	0	0	3	4
O45430_CAEEL	mccc-1	0	0	6	6	1	1	8	10
D0IMZ6_CAEEL	fln-1	0	0	6	8	1	1	6	7
Q8MXF1_CAEEL	F56F11.4	0	0	6	6	1	1	5	5
G5EBE4_CAEEL	abts-3	0	0	6	7	0	0	10	12
GLD4_CAEEL	gld-4	0	0	6	7	0	0	5	12
H2L075_CAEEL	ketn-1	0	0	6	8	0	0	5	10
H2KZF9_CAEEL	madf-6	0	0	6	10	0	0	7	9
Q9NAN8_CAEEL	pfs-2	0	0	6	6	0	0	7	9
COPE_CAEEL	F45G2.4	0	0	6	8	0	0	7	8
AL7A1_CAEEL	alh-9	0	0	6	7	0	0	5	8
Q09646_CAEEL	ham-3	0	0	6	6	0	0	7	8
CAH3_CAEEL	cah-3	0	0	6	7	0	0	6	7
EIF3M_CAEEL	cif-1	0	0	5	5	4	4	4	4
EIF3C_CAEEL	eif-3.C	0	0	5	5	3	4	1	1
EIF3H_CAEEL	eif-3.H	0	0	5	5	3	3	5	5
G6PD_CAEEL	gspd-1	0	0	5	6	2	2	7	7
Q95X44_CAEEL	vha-8	0	0	5	5	1	1	4	5
Q9U9J8_CAEEL	bgs-1	0	0	5	6	0	0	31	37
Q2A950_CAEEL	phf-10	0	0	5	5	0	0	11	14
Q53U87_CAEEL	sax-7	0	0	5	8	0	0	8	12
RL15_CAEEL	rpl-15	0	0	5	6	0	0	5	8
O16929_CAEEL	symk-1	0	0	5	5	0	0	7	7
TOR_CAEEL	let-363	0	0	5	6	0	0	6	6
14332_CAEEL	ftt-2	0	0	5	5	0	0	5	6
O45577_CAEEL	cpf-2	0	0	5	9	0	0	3	5
Q9XUS4_CAEEL	K08E3.5	0	0	5	6	0	0	5	5
Q23463_CAEEL	eftu-2	0	0	5	5	0	0	5	5
MDHM_CAEEL	mdh-1	0	0	5	5	0	0	5	5
Q9N5V3_CAEEL	imb-3	0	0	5	6	0	0	3	4
IFA2_CAEEL	ifa-2	0	0	5	5	0	0	4	4
O17759_CAEEL	tkt-1	0	0	5	6	0	0	3	3
Q20206_CAEEL	rps-11	0	0	4	5	3	3	6	12
ENO_CAEEL	enol-1	0	0	4	4	2	3	2	3
ECHM_CAEEL	ech-6	0	0	4	4	1	1	8	10
RS19_CAEEL	rps-19	0	0	4	7	1	1	4	8
G5EBP5_CAEEL	ZC247.1	0	0	4	5	0	0	9	13
RIR1_CAEEL	rnr-1	0	0	4	5	0	0	9	10
G5EGK1_CAEEL	Y71G12B.11	0	0	4	4	0	0	9	9
LIN5_CAEEL	lin-5	0	0	4	4	0	0	7	8
B3GWB2_CAEEL	C08H9.2	0	0	4	5	0	0	6	7
Q565A2_CAEEL	pbrm-1	0	0	4	4	0	0	7	7
G4SPY1_CAEEL	Y71G10AL.1	0	0	4	4	0	0	6	6
IF4E3_CAEEL	ife-3	0	0	4	4	0	0	5	5
RS5_CAEEL	rps-5	0	0	4	4	0	0	5	5
Q9NLD1_CAEEL	hrp-2	0	0	4	4	0	0	4	4
O44727_CAEEL	cpn-4	0	0	4	6	0	0	2	3
Q21831_CAEEL	snfc-5	0	0	4	4	0	0	3	3
RPB2_CAEEL	rpb-2	0	0	4	4	0	0	2	2
O17622_CAEEL	C29F7.3	0	0	3	4	1	1	1	1
ETFA_CAEEL	F27D4.1	0	0	3	3	1	1	1	1
Q9NA33_CAEEL	Y73F8A.26	0	0	3	3	0	0	13	20
CATA1_CAEEL	ctl-2	0	0	3	4	0	0	6	9
Q9N302_CAEEL	acs-13	0	0	3	3	0	0	9	9
HSP7F_CAEEL	hsp-6	0	0	3	3	0	0	9	9
UBH4_CAEEL	ubh-4	0	0	3	4	0	0	6	8
VIT5_CAEEL	vit-5	0	0	3	3	0	0	5	8
TXTP_CAEEL	K11H3.3	0	0	3	4	0	0	6	7
MES2_CAEEL	mes-2	0	0	3	3	0	0	6	7
G5EC98_CAEEL	ctps-1	0	0	3	5	0	0	5	6
G5EGP8_CAEEL	cpz-1	0	0	3	3	0	0	4	5
Q22138_CAEEL	dnj-18	0	0	3	3	0	0	5	5
Q9N4N4_CAEEL	swsn-6	0	0	3	3	0	0	4	5
Q20277_CAEEL	fipr-21	0	0	3	5	0	0	3	4
Q9XTV4_CAEEL	mbf-1	0	0	3	4	0	0	3	4
Q9UAU3_CAEEL	tag-304	0	0	3	4	0	0	3	4
Q7Z145_CAEEL	ZK418.9	0	0	3	4	0	0	4	4
Q18074_CAEEL	C18B2.3	0	0	3	3	0	0	4	4
PGAM5_CAEEL	pgam-5	0	0	3	3	0	0	4	4
PUF12_CAEEL	puf-12	0	0	3	3	0	0	3	4
Q93934_CAEEL	R07H5.8	0	0	3	3	0	0	3	4
Q95PY8_CAEEL	cpsf-3	0	0	3	4	0	0	3	3
GLD1_CAEEL	gld-1	0	0	3	4	0	0	3	3
Q20757_CAEEL	puf-5	0	0	3	4	0	0	3	3
ALF1_CAEEL	aldo-1	0	0	3	3	0	0	3	3
P90961_CAEEL	clic-1	0	0	3	3	0	0	3	3
TPS2_CAEEL	tps-2	0	0	3	3	0	0	3	3
GLC7A_CAEEL	gsp-1	0	0	3	4	0	0	2	2
KIN20_CAEEL	kin-20	0	0	3	4	0	0	2	2
DYHC_CAEEL	dhc-1	0	0	3	3	0	0	2	2
GLC7B_CAEEL	gsp-2	0	0	3	3	0	0	2	2
GSTPA_CAEEL	gst-10	0	0	3	3	0	0	2	2
Q94271_CAEEL	K10C2.3	0	0	3	3	0	0	2	2
Q9N589_CAEEL	mtm-1	0	0	3	3	0	0	2	2
NAS11_CAEEL	nas-11	0	0	3	3	0	0	2	2
Q86G90_CAEEL	npp-9	0	0	3	3	0	0	2	2
G5ED36_CAEEL	rme-8	0	0	3	3	0	0	2	2
O16454_CAEEL	tag-196	0	0	3	3	0	0	2	2
G5EDZ2_CAEEL	umps-1	0	0	3	3	0	0	2	2
O45934_CAEEL	Y43F4B.5	0	0	3	3	0	0	2	2
Q86DA0_CAEEL	Y43F4B.5	0	0	3	3	0	0	2	2
H2KZA3_CAEEL	pqn-22	0	0	2	3	3	3	9	12
MCCB_CAEEL	F02A9.4	0	0	2	2	1	1	4	4
IF5A2_CAEEL	iff-2	0	0	2	3	1	1	2	2
H2KZS0_CAEEL	T21F4.1	0	0	2	2	1	1	2	2
Q9U238_CAEEL	trap-4	0	0	2	2	1	1	2	2
B3CJ34_CAEEL	gcn-1	0	0	2	2	1	1	1	1
Q45EJ8_CAEEL	lfi-1	0	0	2	2	0	0	17	18
C9IY22_CAEEL	ZK1058.9	0	0	2	4	0	0	8	11
Q8IA64_CAEEL	haf-9	0	0	2	2	0	0	8	8
Q17490_CAEEL	unc-44	0	0	2	2	0	0	8	8
O16297_CAEEL	mcm-7	0	0	2	2	0	0	7	7
Q17436_CAEEL	B0035.6	0	0	2	2	0	0	4	6
G5ECL3_CAEEL	prp-21	0	0	2	2	0	0	5	5
ATPK_CAEEL	R53.4	0	0	2	2	0	0	4	5
SYV_CAEEL	vrs-2	0	0	2	2	0	0	5	5
Q4A1S8_CAEEL	Y39E4A.3	0	0	2	2	0	0	5	5
I2HAJ2_CAEEL	rpl-30	0	0	2	3	0	0	3	4
G5EDD4_CAEEL	tba-4	0	0	2	3	0	0	2	4
CUL1_CAEEL	cul-1	0	0	2	2	0	0	4	4
Q22968_CAEEL	gcst-1	0	0	2	2	0	0	4	4
H2KZJ5_CAEEL	glrx-3	0	0	2	2	0	0	3	4
Q95XQ8_CAEEL	mcm-4	0	0	2	2	0	0	4	4
O17694_CAEEL	ril-1	0	0	2	2	0	0	4	4
Q9XTT9_CAEEL	rpt-6	0	0	2	2	0	0	4	4
G5EBH7_CAEEL	calu-1	0	0	2	3	0	0	3	3
IMA3_CAEEL	ima-3	0	0	2	3	0	0	2	3
RL27_CAEEL	rpl-27	0	0	2	3	0	0	3	3
G5EEF6_CAEEL	alp-1	0	0	2	2	0	0	3	3
Q9XU45_CAEEL	B0379.1	0	0	2	2	0	0	3	3
O17838_CAEEL	F25H5.5	0	0	2	2	0	0	3	3
Q93381_CAEEL	madf-8	0	0	2	2	0	0	3	3
ATP5E_CAEEL	R05D3.6	0	0	2	2	0	0	2	3
O17218_CAEEL	rps-22	0	0	2	2	0	0	2	3
G5EFQ8_CAEEL	smn-1	0	0	2	2	0	0	2	3
UNC18_CAEEL	unc-18	0	0	2	2	0	0	2	3
Q9BKU5_CAEEL	Y37E3.8	0	0	2	2	0	0	3	3
Q18817_CAEEL	ben-1	0	0	2	3	0	0	2	2
Q9TYJ7_CAEEL	dpm-1	0	0	2	3	0	0	2	2
D0IMZ7_CAEEL	fln-1	0	0	2	3	0	0	2	2
H2L0A8_CAEEL	H05C05.1	0	0	2	3	0	0	1	2
RCC1_CAEEL	ran-3	0	0	2	3	0	0	1	2
COX6A_CAEEL	tag-174	0	0	2	3	0	0	2	2
Q23315_CAEEL	ears-1	0	0	2	2	0	0	2	2
Q9U1Q7_CAEEL	emb-4	0	0	2	2	0	0	1	2
O02225_CAEEL	gln-6	0	0	2	2	0	0	1	2
Q9XUU8_CAEEL	K05C4.5	0	0	2	2	0	0	2	2
MES6_CAEEL	mes-6	0	0	2	2	0	0	2	2
Q9N3C9_CAEEL	rpb-7	0	0	2	2	0	0	2	2
Q9U2U0_CAEEL	uaf-2	0	0	2	2	0	0	2	2
G5EDY2_CAEEL	wars-1	0	0	2	2	0	0	2	2
Q8ITV7_CAEEL	Y44E3A.6	0	0	2	2	0	0	2	2
F3Y5R0_CAEEL	Y54E5A.7	0	0	2	2	0	0	2	2
Q9BMU4_CAEEL	atln-1	0	0	2	2	0	0	1	1
O01806_CAEEL	C44E4.4	0	0	2	2	0	0	1	1
O16228_CAEEL	djr-1.2	0	0	2	2	0	0	1	1
O45087_CAEEL	dyci-1	0	0	2	2	0	0	1	1
Q20049_CAEEL	idhg-1	0	0	2	2	0	0	1	1
IF4E2_CAEEL	ife-2	0	0	2	2	0	0	1	1
MCM6_CAEEL	mcm-6	0	0	2	2	0	0	1	1
O44503_CAEEL	R02D3.1	0	0	2	2	0	0	1	1
YNC9_CAEEL	R05D3.9/R05D3.10	0	0	2	2	0	0	1	1
A5Z2W3_CAEEL	R13H4.2	0	0	2	2	0	0	1	1
Q9UAY9_CAEEL	rpac-40	0	0	2	2	0	0	1	1
PDIA6_CAEEL	tag-320	0	0	2	2	0	0	1	1
Q9N362_CAEEL	Y55F3AM.13	0	0	2	2	0	0	1	1
O76449_CAEEL	ZK1055.7	0	0	2	2	0	0	1	1
Q7JNG1_CAEEL	atp-3	0	0	1	1	4	4	6	7
Q8MNT7_CAEEL	F09F7.4	0	0	1	1	3	3	6	7
Q9U1W1_CAEEL	tfg-1	0	0	1	1	2	2	0	0
GCP_CAEEL	gei-7	0	0	1	1	1	1	3	3
Q9BL83_CAEEL	vps-4	0	0	1	1	1	1	3	3
LEC8_CAEEL	lec-8	0	0	1	1	1	1	2	2
6PGD_CAEEL	T25B9.9	0	0	1	1	1	1	2	2
O01607_CAEEL	acdh-4	0	0	1	1	1	1	1	1
YXEK_CAEEL	F53C11.3	0	0	1	1	1	1	1	1
GLH2_CAEEL	glh-2	0	0	1	1	1	1	1	1
PDI1_CAEEL	pdi-1	0	0	1	1	1	1	1	1
Q18231_CAEEL	rps-30	0	0	1	1	1	1	1	1
RSP1_CAEEL	rsp-1	0	0	1	1	1	1	0	0
Q21287_CAEEL	K07E3.2	0	0	1	30	0	0	1	38
CUBN_CAEEL	ZC116.3	0	0	1	1	0	0	18	18
C1P623_CAEEL	nsy-7	0	0	1	7	0	0	1	8
H2KZI1_CAEEL	rcor-1	0	0	1	3	0	0	2	5
K8ESK7_CAEEL	R13H4.2	0	0	1	2	0	0	4	5
Q19126_CAEEL	asb-2	0	0	1	1	0	0	5	5
Q9XVR7_CAEEL	mcm-3	0	0	1	2	0	0	4	4
O16521_CAEEL	hpo-19	0	0	1	1	0	0	2	4
P91079_CAEEL	sptl-1	0	0	1	1	0	0	2	4
GLD2_CAEEL	gld-2	0	0	1	1	0	0	3	3
GPDH2_CAEEL	gpdh-2	0	0	1	1	0	0	3	3
G5ECZ0_CAEEL	hum-5	0	0	1	1	0	0	3	3
Q18038_CAEEL	let-716	0	0	1	1	0	0	3	3
Q8MXS0_CAEEL	mca-3	0	0	1	1	0	0	3	3
Q9TYV5_CAEEL	nol-1	0	0	1	1	0	0	2	3
Q9N3F8_CAEEL	ral-1	0	0	1	1	0	0	2	3
NHP2_CAEEL	Y48A6B.3	0	0	1	1	0	0	3	3
O18239_CAEEL	Y57G11C.15	0	0	1	1	0	0	2	3
YQP4_CAEEL	F07F6.4	0	0	1	2	0	0	2	2
Q21531_CAEEL	ifg-1	0	0	1	2	0	0	2	2
O45713_CAEEL	R09B3.3	0	0	1	2	0	0	1	2
Q8MXJ1_CAEEL	T23E7.2	0	0	1	2	0	0	1	2
CPR4_CAEEL	cpr-4	0	0	1	1	0	0	2	2
Q19642_CAEEL	czw-1	0	0	1	1	0	0	2	2
A7DT40_CAEEL	F49D11.10	0	0	1	1	0	0	2	2
HSP7D_CAEEL	hsp-4	0	0	1	1	0	0	2	2
Q94213_CAEEL	irld-7	0	0	1	1	0	0	1	2
O17004_CAEEL	mrps-2	0	0	1	1	0	0	1	2
Q95Y15_CAEEL	npp-8	0	0	1	1	0	0	2	2
Q22620_CAEEL	pars-1	0	0	1	1	0	0	2	2
Q93537_CAEEL	plp-2	0	0	1	1	0	0	2	2
O61742_CAEEL	rpn-10	0	0	1	1	0	0	2	2
HEAT1_CAEEL	toe-1	0	0	1	1	0	0	2	2
Q17489_CAEEL	unc-44	0	0	1	1	0	0	2	2
EF1B2_CAEEL	Y41E3.10	0	0	1	1	0	0	1	2
YLU5_CAEEL	F10E9.5	0	0	1	2	0	0	1	1
Q19901_CAEEL	hum-1	0	0	1	2	0	0	1	1
PSA7_CAEEL	pas-4	0	0	1	2	0	0	1	1
Q9U2Z1_CAEEL	sec-23	0	0	1	2	0	0	1	1
ACADM_CAEEL	acdh-10	0	0	1	1	0	0	1	1
Q18916_CAEEL	acs-22	0	0	1	1	0	0	1	1
ARPC2_CAEEL	arx-4	0	0	1	1	0	0	1	1
Q7YTG9_CAEEL	cpsf-4	0	0	1	1	0	0	1	1
P90994_CAEEL	djr-1.1	0	0	1	1	0	0	1	1
DYN1_CAEEL	dyn-1	0	0	1	1	0	0	1	1
O45106_CAEEL	ech-5	0	0	1	1	0	0	1	1
Q21740_CAEEL	edc-3	0	0	1	1	0	0	1	1
G5ED33_CAEEL	eps-8	0	0	1	1	0	0	1	1
F5GUF6_CAEEL	F32B4.4	0	0	1	1	0	0	1	1
Q20310_CAEEL	F42A10.5	0	0	1	1	0	0	1	1
YL58_CAEEL	F44E2.8	0	0	1	1	0	0	1	1
Q93831_CAEEL	F59C6.5	0	0	1	1	0	0	1	1
O45159_CAEEL	fbxa-65	0	0	1	1	0	0	1	1
FIGL1_CAEEL	figl-1	0	0	1	1	0	0	1	1
O16293_CAEEL	fipp-1	0	0	1	1	0	0	1	1
SYFB_CAEEL	frs-2	0	0	1	1	0	0	1	1
O62107_CAEEL	gale-1	0	0	1	1	0	0	1	1
GPR1_CAEEL	gpr-1	0	0	1	1	0	0	1	1
O16298_CAEEL	hpo-18	0	0	1	1	0	0	1	1
Q21525_CAEEL	M05D6.6	0	0	1	1	0	0	1	1
MMAA1_CAEEL	mmaa-1	0	0	1	1	0	0	1	1
Q9U3Q0_CAEEL	mrps-22	0	0	1	1	0	0	1	1
H2KYE0_CAEEL	nra-4	0	0	1	1	0	0	1	1
SYNC_CAEEL	nrs-1	0	0	1	1	0	0	1	1
Q4TT88_CAEEL	pam-1	0	0	1	1	0	0	1	1
PSA6_CAEEL	pas-1	0	0	1	1	0	0	1	1
G5EGB3_CAEEL	ragc-1	0	0	1	1	0	0	1	1
RL37A_CAEEL	rpl-43	0	0	1	1	0	0	1	1
RRS1_CAEEL	rrbs-1	0	0	1	1	0	0	1	1
G5EDR3_CAEEL	sur-6	0	0	1	1	0	0	1	1
H2KZS4_CAEEL	T23E7.2	0	0	1	1	0	0	1	1
Q27528_CAEEL	T25B9.2	0	0	1	1	0	0	1	1
Q22729_CAEEL	tbc-4	0	0	1	1	0	0	1	1
Q19328_CAEEL	tsn-1	0	0	1	1	0	0	1	1
UFD1_CAEEL	ufd-1	0	0	1	1	0	0	1	1
A5A8Q9_CAEEL	unc-57	0	0	1	1	0	0	1	1
G5EG85_CAEEL	unc-70	0	0	1	1	0	0	1	1
O44183_CAEEL	ZC416.6	0	0	1	1	0	0	1	1
Q9XUK2_CAEEL	zip-3	0	0	1	1	0	0	1	1
Ig1_sheep		0	0	1	1	0	0	1	1
Q20219_CAEEL	F40F4.6	0	0	0	0	9	10	0	0
YQS6_CAEEL	F21H12.6	0	0	0	0	9	9	0	0
G5ECR0_CAEEL	T25C12.3	0	0	0	0	9	9	0	0
Q9XUW5_CAEEL	F58E10.3	0	0	0	0	4	4	14	17
Q8MXR2_CAEEL	hrpf-2	0	0	0	0	4	4	3	4
IgG3b_bovine		0	0	0	0	2	4	0	0
Q9N3F7_CAEEL	Y53G8AR.9	0	0	0	0	3	3	1	1
ASP6_CAEEL	asp-6	0	0	0	0	2	3	0	0
P90898_CAEEL	F58G11.3	0	0	0	0	2	3	0	0
Q9N4B1_CAEEL	clp-7	0	0	0	0	2	2	2	2
EGL4_CAEEL	egl-4	0	0	0	0	2	2	2	2
H2B1_CAEEL	his-11	0	0	0	0	2	2	1	2
ARP2_CAEEL	arx-2	0	0	0	0	2	2	1	1
Q19246_CAEEL	dhs-25	0	0	0	0	2	2	1	1
Q23158_CAEEL	atn-1	0	0	0	0	2	2	0	0
Q9N303_CAEEL	deps-1	0	0	0	0	1	2	0	0
Q93535_CAEEL	F20D1.3	0	0	0	0	2	2	0	0
Q19853_CAEEL	F28B4.3	0	0	0	0	2	2	0	0
Q86GU1_CAEEL	hsp-25	0	0	0	0	2	2	0	0
O44565_CAEEL	lam-1	0	0	0	0	2	2	0	0
Q21281_CAEEL	mup-4	0	0	0	0	1	2	0	0
PGK_CAEEL	pgk-1	0	0	0	0	2	2	0	0
Q9XUS8_CAEEL	tyr-2	0	0	0	0	2	2	0	0
Q95Y28_CAEEL	Y34B4A.9	0	0	0	0	1	2	0	0
SCOT_CAEEL	C05C10.3	0	0	0	0	1	1	7	10
RLA1_CAEEL	rla-1	0	0	0	0	1	1	2	3
H2KYV3_CAEEL	C18B2.5	0	0	0	0	1	1	2	2
RO60_CAEEL	rop-1	0	0	0	0	1	1	1	1
TNNI2_CAEEL	unc-27	0	0	0	0	1	1	1	1
Q18020_CAEEL	C15C8.3	0	0	0	0	1	1	0	0
Q20628_CAEEL	cdd-2	0	0	0	0	1	1	0	0
CPR1_CAEEL	cpr-1	0	0	0	0	1	1	0	0
CUL6_CAEEL	cul-6	0	0	0	0	1	1	0	0
CYP2_CAEEL	cyn-2	0	0	0	0	1	1	0	0
A8XQE0_CAEEL	ekl-4	0	0	0	0	1	1	0	0
Q22235_CAEEL	enpl-1	0	0	0	0	1	1	0	0
G5EFS5_CAEEL	F45D11.15	0	0	0	0	1	1	0	0
Q966E6_CAEEL	fbxa-36	0	0	0	0	1	1	0	0
G5EBR1_CAEEL	gdi-1	0	0	0	0	1	1	0	0
C6KRI7_CAEEL	grsp-2	0	0	0	0	1	1	0	0
Q9BIB7_CAEEL	hrpf-1	0	0	0	0	1	1	0	0
H2KZN0_CAEEL	hrpf-1	0	0	0	0	1	1	0	0
O44512_CAEEL	isp-1	0	0	0	0	1	1	0	0
Q4R127_CAEEL	K11D12.13	0	0	0	0	1	1	0	0
LAM2_CAEEL	lam-2	0	0	0	0	1	1	0	0
MBTR1_CAEEL	mbtr-1	0	0	0	0	1	1	0	0
H2L098_CAEEL	nhr-195	0	0	0	0	1	1	0	0
Q19727_CAEEL	prpf-4	0	0	0	0	1	1	0	0
RSP3_CAEEL	rsp-3	0	0	0	0	1	1	0	0
RSP6_CAEEL	rsp-6	0	0	0	0	1	1	0	0
Q9XU13_CAEEL	sca-1	0	0	0	0	1	1	0	0
Q9TZI9_CAEEL	spe-15	0	0	0	0	1	1	0	0
SPT16_CAEEL	spt-16	0	0	0	0	1	1	0	0
G5EDT5_CAEEL	ttn-1	0	0	0	0	1	1	0	0
UNC52_CAEEL	unc-52	0	0	0	0	1	1	0	0
Q9XWT5_CAEEL	Y62H9A.3	0	0	0	0	1	1	0	0
LONM_CAEEL	C34B2.6	0	0	0	0	0	0	17	20
CED9_CAEEL	ced-9	0	0	0	0	0	0	1	11
O02101_CAEEL	swsn-2.2	0	0	0	0	0	0	6	7
H9G2U9_CAEEL	B0001.7	0	0	0	0	0	0	6	6
K8ESF0_CAEEL	F13D2.1	0	0	0	0	0	0	1	6
O02141_CAEEL	C46G7.2	0	0	0	0	0	0	4	5
Q21032_CAEEL	idh-1	0	0	0	0	0	0	5	5
Q19335_CAEEL	repo-1	0	0	0	0	0	0	2	5
Q9U1R7_CAEEL	arx-3	0	0	0	0	0	0	4	4
IF6_CAEEL	eif-6	0	0	0	0	0	0	3	4
Q20950_CAEEL	F57F5.1	0	0	0	0	0	0	4	4
RIM_CAEEL	unc-10	0	0	0	0	0	0	4	4
Q9N5B3_CAEEL	W08E12.7	0	0	0	0	0	0	3	4
Q9N5Y2_CAEEL	art-1	0	0	0	0	0	0	3	3
SUCA_CAEEL	C05G5.4	0	0	0	0	0	0	3	3
Q95YC6_CAEEL	C45B2.1	0	0	0	0	0	0	2	3
Q20720_CAEEL	F53F4.11	0	0	0	0	0	0	2	3
GLD3_CAEEL	gld-3	0	0	0	0	0	0	2	3
Q22100_CAEEL	kat-1	0	0	0	0	0	0	3	3
Q21154_CAEEL	moma-1	0	0	0	0	0	0	2	3
O02089_CAEEL	msra-1	0	0	0	0	0	0	3	3
Q95X24_CAEEL	pfk-1	0	0	0	0	0	0	3	3
O61794_CAEEL	R12E2.2	0	0	0	0	0	0	3	3
Q22412_CAEEL	T11G6.8	0	0	0	0	0	0	3	3
Q22469_CAEEL	T13H5.4	0	0	0	0	0	0	3	3
Q95XT5_CAEEL	trap-1	0	0	0	0	0	0	2	3
G5EE48_CAEEL	ttr-50	0	0	0	0	0	0	3	3
Q19057_CAEEL	acdh-12	0	0	0	0	0	0	2	2
Q86GC3_CAEEL	adr-1	0	0	0	0	0	0	2	2
Q8IG19_CAEEL	alh-1	0	0	0	0	0	0	2	2
O44439_CAEEL	B0546.3	0	0	0	0	0	0	2	2
O17328_CAEEL	C10E2.6	0	0	0	0	0	0	2	2
Q09482_CAEEL	C18H9.3	0	0	0	0	0	0	2	2
Q18529_CAEEL	C39D10.7	0	0	0	0	0	0	2	2
P91154_CAEEL	C43E11.9	0	0	0	0	0	0	1	2
O44154_CAEEL	C49A9.2	0	0	0	0	0	0	1	2
Q23382_CAEEL	ccdc-47	0	0	0	0	0	0	2	2
G5EE66_CAEEL	cogc-1	0	0	0	0	0	0	2	2
CORO_CAEEL	cor-1	0	0	0	0	0	0	1	2
Q93540_CAEEL	F20D1.9	0	0	0	0	0	0	2	2
H2FLK1_CAEEL	F32A7.5	0	0	0	0	0	0	2	2
Q9XU97_CAEEL	F44E5.1	0	0	0	0	0	0	2	2
MPC1_CAEEL	F53F10.3	0	0	0	0	0	0	2	2
SRP68_CAEEL	F55C5.8	0	0	0	0	0	0	2	2
ATPD_CAEEL	F58F12.1	0	0	0	0	0	0	2	2
G5EBJ7_CAEEL	fbp-1	0	0	0	0	0	0	2	2
GSTP1_CAEEL	gst-1	0	0	0	0	0	0	1	2
H2AV_CAEEL	htz-1	0	0	0	0	0	0	2	2
Q21351_CAEEL	K08F4.2	0	0	0	0	0	0	2	2
SYK_CAEEL	krs-1	0	0	0	0	0	0	2	2
D5MCN2_CAEEL	larp-1	0	0	0	0	0	0	2	2
Q94215_CAEEL	lec-11	0	0	0	0	0	0	2	2
LIN53_CAEEL	lin-53	0	0	0	0	0	0	2	2
LMN1_CAEEL	lmn-1	0	0	0	0	0	0	2	2
MES3_CAEEL	mes-3	0	0	0	0	0	0	2	2
NUP98_CAEEL	npp-10	0	0	0	0	0	0	2	2
Q86S76_CAEEL	nuo-5	0	0	0	0	0	0	2	2
Q9TZL8_CAEEL	pfk-1	0	0	0	0	0	0	2	2
PROF1_CAEEL	pfn-1	0	0	0	0	0	0	2	2
Q21486_CAEEL	prp-3	0	0	0	0	0	0	2	2
SAX1_CAEEL	sax-1	0	0	0	0	0	0	2	2
G5ECQ3_CAEEL	sel-5	0	0	0	0	0	0	1	2
Q22134_CAEEL	T04A8.5	0	0	0	0	0	0	2	2
ODPA_CAEEL	T05H10.6	0	0	0	0	0	0	2	2
Q22302_CAEEL	T07D1.2	0	0	0	0	0	0	2	2
Q8T3D2_CAEEL	T08G11.1	0	0	0	0	0	0	1	2
O44985_CAEEL	teg-4	0	0	0	0	0	0	1	2
VATD_CAEEL	vha-14	0	0	0	0	0	0	2	2
O01706_CAEEL	VZC374L.1	0	0	0	0	0	0	1	2
Q9XWK4_CAEEL	Y54E5A.7	0	0	0	0	0	0	2	2
G5EGB9_CAEEL	abts-2	0	0	0	0	0	0	1	1
ADAS_CAEEL	ads-1	0	0	0	0	0	0	1	1
RPB1_CAEEL	ama-1	0	0	0	0	0	0	1	1
O01813_CAEEL	ant-1.2	0	0	0	0	0	0	1	1
YP68_CAEEL	B0495.8	0	0	0	0	0	0	1	1
GMD1_CAEEL	bre-1	0	0	0	0	0	0	1	1
Q9U1S2_CAEEL	brp-1	0	0	0	0	0	0	1	1
O01483_CAEEL	C06A5.1	0	0	0	0	0	0	1	1
MTHR_CAEEL	C06A8.1	0	0	0	0	0	0	1	1
Q17936_CAEEL	C12D8.1	0	0	0	0	0	0	1	1
Q18025_CAEEL	C15H9.4	0	0	0	0	0	0	1	1
YQ53_CAEEL	C16C10.3	0	0	0	0	0	0	1	1
EBP2_CAEEL	C18A3.3	0	0	0	0	0	0	1	1
H2KYY0_CAEEL	C23H5.8	0	0	0	0	0	0	1	1
Q9XVS2_CAEEL	C25A1.4	0	0	0	0	0	0	1	1
Q18805_CAEEL	C53B7.2	0	0	0	0	0	0	1	1
YSE2_CAEEL	C53C9.2	0	0	0	0	0	0	1	1
Q18813_CAEEL	C53D6.7	0	0	0	0	0	0	1	1
YQK1_CAEEL	akap-1	0	0	0	0	0	0	1	1
G5EDZ7_CAEEL	cdr-4	0	0	0	0	0	0	1	1
O16641_CAEEL	clec-126	0	0	0	0	0	0	1	1
E5QCF2_CAEEL	col-53	0	0	0	0	0	0	1	1
COQ6_CAEEL	coq-6	0	0	0	0	0	0	1	1
COX2_CAEEL	cox-2	0	0	0	0	0	0	1	1
Q18949_CAEEL	D1054.3	0	0	0	0	0	0	1	1
G5EET2_CAEEL	dut-1	0	0	0	0	0	0	1	1
Q22752_CAEEL	dyrb-1	0	0	0	0	0	0	1	1
EIF3E_CAEEL	eif-3.E	0	0	0	0	0	0	1	1
SYQ_CAEEL	ers-1	0	0	0	0	0	0	1	1
Q19237_CAEEL	F09A5.4	0	0	0	0	0	0	1	1
Q19293_CAEEL	F10C5.2	0	0	0	0	0	0	1	1
Q93517_CAEEL	F16B12.4	0	0	0	0	0	0	1	1
G1K106_CAEEL	F22G12.4	0	0	0	0	0	0	1	1
Q93569_CAEEL	F25H2.6	0	0	0	0	0	0	1	1
Q7JLI9_CAEEL	F32D8.12	0	0	0	0	0	0	1	1
G5EE11_CAEEL	F39H2.3	0	0	0	0	0	0	1	1
PP2C1_CAEEL	F42G9.1	0	0	0	0	0	0	1	1
Q20626_CAEEL	F49E2.5	0	0	0	0	0	0	1	1
P91340_CAEEL	F55F8.2	0	0	0	0	0	0	1	1
O44517_CAEEL	F56A11.5	0	0	0	0	0	0	1	1
Q21484_CAEEL	hat-1	0	0	0	0	0	0	1	1
H4_CAEEL	his-1	0	0	0	0	0	0	1	1
CMC1_CAEEL	K02F3.2	0	0	0	0	0	0	1	1
Q21194_CAEEL	K03E6.7	0	0	0	0	0	0	1	1
Q21210_CAEEL	K04C2.2	0	0	0	0	0	0	1	1
JAGN_CAEEL	K05C4.2	0	0	0	0	0	0	1	1
O17798_CAEEL	kpc-1	0	0	0	0	0	0	1	1
H2L0I2_CAEEL	lfi-1	0	0	0	0	0	0	1	1
G5EF39_CAEEL	lim-9	0	0	0	0	0	0	1	1
LMP1_CAEEL	lmp-1	0	0	0	0	0	0	1	1
LSM4_CAEEL	lsm-4	0	0	0	0	0	0	1	1
Q9UAV5_CAEEL	mdh-1	0	0	0	0	0	0	1	1
Q7Z1P1_CAEEL	mek-1	0	0	0	0	0	0	1	1
MIX1_CAEEL	mix-1	0	0	0	0	0	0	1	1
Q95QS3_CAEEL	mrps-26	0	0	0	0	0	0	1	1
SYMC_CAEEL	mrs-1	0	0	0	0	0	0	1	1
Q9U365_CAEEL	ngp-1	0	0	0	0	0	0	1	1
Q93791_CAEEL	nid-1	0	0	0	0	0	0	1	1
NU133_CAEEL	npp-15	0	0	0	0	0	0	1	1
A5JYX8_CAEEL	nra-2	0	0	0	0	0	0	1	1
GNL3_CAEEL	nst-1	0	0	0	0	0	0	1	1
Q21233_CAEEL	nuo-4	0	0	0	0	0	0	1	1
F5GU87_CAEEL	otub-3	0	0	0	0	0	0	1	1
A7DT45_CAEEL	oxy-5	0	0	0	0	0	0	1	1
PHB2_CAEEL	phb-2	0	0	0	0	0	0	1	1
Q7JLJ3_CAEEL	ppm-1	0	0	0	0	0	0	1	1
H2KZA4_CAEEL	pqn-22	0	0	0	0	0	0	1	1
P90786_CAEEL	prg-1	0	0	0	0	0	0	1	1
Q8IU00_CAEEL	puf-11	0	0	0	0	0	0	1	1
G5ECZ2_CAEEL	ret-1	0	0	0	0	0	0	1	1
RIR2_CAEEL	rnr-2	0	0	0	0	0	0	1	1
RL37_CAEEL	rpl-37	0	0	0	0	0	0	1	1
PSDE_CAEEL	rpn-11	0	0	0	0	0	0	1	1
Q9NAH6_CAEEL	rsks-1	0	0	0	0	0	0	1	1
EXOC6_CAEEL	sec-15	0	0	0	0	0	0	1	1
Q9U2C1_CAEEL	smc-3	0	0	0	0	0	0	1	1
RSMB_CAEEL	snr-2	0	0	0	0	0	0	1	1
D9PTP5_CAEEL	snx-6	0	0	0	0	0	0	1	1
SOR3_CAEEL	sor-3	0	0	0	0	0	0	1	1
Q22101_CAEEL	T02G5.7	0	0	0	0	0	0	1	1
NOG1_CAEEL	T07A9.9	0	0	0	0	0	0	1	1
O16725_CAEEL	T07D3.9	0	0	0	0	0	0	1	1
Q22352_CAEEL	T08H10.1	0	0	0	0	0	0	1	1
Q9XUN8_CAEEL	T20B3.1	0	0	0	0	0	0	1	1
IMDH_CAEEL	T22D1.3	0	0	0	0	0	0	1	1
TG210_CAEEL	tag-210	0	0	0	0	0	0	1	1
SARM1_CAEEL	tir-1	0	0	0	0	0	0	1	1
Q9U3P5_CAEEL	tram-1	0	0	0	0	0	0	1	1
O76708_CAEEL	tyr-5	0	0	0	0	0	0	1	1
Q9TZ33_CAEEL	ucr-2.3	0	0	0	0	0	0	1	1
UN112_CAEEL	unc-112	0	0	0	0	0	0	1	1
ADF1_CAEEL	unc-60	0	0	0	0	0	0	1	1
VATG_CAEEL	vha-10	0	0	0	0	0	0	1	1
H2KZL1_CAEEL	W04B5.3	0	0	0	0	0	0	1	1
XRN2_CAEEL	xrn-2	0	0	0	0	0	0	1	1
C7IVS0_CAEEL	Y38H6C.25	0	0	0	0	0	0	1	1
Q8I4D3_CAEEL	Y43F8B.1	0	0	0	0	0	0	1	1
Q965N8_CAEEL	Y46E12BL.2	0	0	0	0	0	0	1	1
PNCB_CAEEL	Y54G2A.17	0	0	0	0	0	0	1	1
Q9XWG2_CAEEL	Y63D3A.7	0	0	0	0	0	0	1	1
Q95PZ1_CAEEL	Y67H2A.5	0	0	0	0	0	0	1	1
Q2AAC0_CAEEL	Y71H2AM.3	0	0	0	0	0	0	1	1
G5EE42_CAEEL	ZK1098.11	0	0	0	0	0	0	1	1
