# Supplementary material for: A tudor domain protein, SIMR-1, promotes siRNA production at piRNA-targeted mRNAs in C. elegans
Source: eLife. 2020 Apr 27;9:e56731. doi: 10.7554/eLife.56731 (PMC7255803; doi:10.7554/eLife.56731)
Supplement: Supplementary file 3. [file elife-56731-supp3.xlsx]

## Sheet: Table summary
Supplementary File 3. Small expression in simr-1, mut-16, and prg-1 mutant animals.
Sheet 1	Table summary
Sheet 2	Small RNAs significantly down-regulated 2 fold or greater in simr-1 mutant animals at 20ºC
Sheet 3	Small RNAs significantly up-regulated 2 fold or greater in simr-1 mutant animals at 20ºC
Sheet 4	Small RNAs significantly down-regulated 2 fold or greater in simr-1 mutant animals at 25ºC for one generation
Sheet 5	Small RNAs significantly up-regulated 2 fold or greater in simr-1 mutant animals at 25ºC for one generation
Sheet 6	Small RNAs significantly down-regulated 2 fold or greater in simr-1 mutant animals at 25ºC for two generations
Sheet 7	Small RNAs significantly up-regulated 2 fold or greater in simr-1 mutant animals at 25ºC for two generations
Sheet 8	Small RNAs significantly down-regulated 2 fold or greater in simr-1 mutant animals at 25ºC for seven generations
Sheet 9	Small RNAs significantly up-regulated 2 fold or greater in simr-1 mutant animals at 25ºC for seven generations
Sheet 10	Small RNAs significantly down-regulated 2 fold or greater in simr-1 mutant animals at 25ºC for 10 generations
Sheet 11	Small RNAs significantly up-regulated 2 fold or greater in simr-1 mutant animals at 25ºC for 10 generations
Sheet 12	Small RNAs significantly down-regulated 2 fold or greater in mut-16 mutant animals at 20ºC
Sheet 13	Small RNAs significantly up-regulated 2 fold or greater in mut-16 mutant animals at 20ºC
Sheet 14	Small RNAs significantly down-regulated 2 fold or greater in mut-16 mutant animals at 25ºC
Sheet 15	Small RNAs significantly up-regulated 2 fold or greater in mut-16 mutant animals at 25ºC
Sheet 16	Small RNAs significantly down-regulated 2 fold or greater in prg-1 mutant animals at 20ºC
Sheet 17	Small RNAs significantly up-regulated 2 fold or greater in prg-1 mutant animals at 20ºC

## Sheet: simr-1 20C down
Supplementary File 3, Sheet 2. Small RNAs significantly down-regulated 2 fold or greater in simr-1 mutant animals at 20ºC.
Gene name	log2FoldChange
WBGene00022438	-7.20089
WBGene00017644	-5.04372
WBGene00019538	-5.0129
WBGene00004196	-4.9428
WBGene00003579	-4.93457
WBGene00010735	-4.71673
WBGene00022209	-4.67635
WBGene00017106	-4.67364
WBGene00002100	-4.6339
WBGene00016273	-4.26256
WBGene00017515	-4.2528
WBGene00019267	-4.24221
WBGene00017354	-4.22991
WBGene00005061	-4.20644
WBGene00012407	-4.17742
WBGene00001955	-4.12071
WBGene00020988	-4.11526
WBGene00013622	-4.03125
WBGene00017629	-3.99752
WBGene00014033	-3.95363
WBGene00015868	-3.93751
WBGene00009510	-3.92965
WBGene00013614	-3.8888
WBGene00012295	-3.85436
WBGene00005235	-3.83758
WBGene00015111	-3.83307
WBGene00022315	-3.7501
WBGene00019044	-3.7441
WBGene00219957	-3.72641
WBGene00013812	-3.60832
WBGene00022358	-3.59026
WBGene00016308	-3.56745
WBGene00009081	-3.55996
WBGene00013830	-3.55473
WBGene00021148	-3.54777
WBGene00006962	-3.51902
WBGene00017148	-3.5164
WBGene00013736	-3.46989
WBGene00022441	-3.45678
WBGene00012572	-3.43033
WBGene00016661	-3.39149
WBGene00000518	-3.38497
WBGene00044502	-3.38393
WBGene00009288	-3.37058
WBGene00010330	-3.36596
WBGene00019577	-3.35195
WBGene00019899	-3.35147
WBGene00013499	-3.34892
WBGene00206535	-3.34809
WBGene00016165	-3.33628
WBGene00018309	-3.30905
WBGene00011592	-3.30258
WBGene00007600	-3.28856
WBGene00007750	-3.28453
WBGene00000535	-3.2812
WBGene00019370	-3.27989
WBGene00017630	-3.27788
WBGene00045255	-3.26636
WBGene00015735	-3.25139
WBGene00013802	-3.25019
WBGene00008890	-3.2414
WBGene00009495	-3.23964
WBGene00008776	-3.22869
WBGene00003124	-3.22399
WBGene00003387	-3.21946
WBGene00019208	-3.21013
WBGene00003480	-3.20281
WBGene00010976	-3.19984
WBGene00001745	-3.19453
WBGene00219413	-3.18723
WBGene00021668	-3.16814
WBGene00018383	-3.14329
WBGene00018608	-3.13924
WBGene00007275	-3.13814
WBGene00000469	-3.11457
WBGene00000903	-3.10261
WBGene00007405	-3.09781
WBGene00018433	-3.0962
WBGene00007489	-3.09241
WBGene00013565	-3.08866
WBGene00219675	-3.08122
WBGene00015504	-3.06006
WBGene00013387	-3.0433
WBGene00016935	-3.0383
WBGene00012846	-3.02827
WBGene00015492	-3.02666
WBGene00012299	-3.0188
WBGene00016550	-3.01663
WBGene00001705	-3.00908
WBGene00009660	-3.00005
WBGene00010528	-2.99582
WBGene00018021	-2.98281
WBGene00010226	-2.97925
WBGene00020456	-2.97457
WBGene00000075	-2.97325
WBGene00175029	-2.96788
WBGene00004377	-2.95212
WBGene00012710	-2.94515
WBGene00019909	-2.94268
WBGene00001638	-2.936
WBGene00195226	-2.91703
WBGene00018005	-2.88781
WBGene00012866	-2.88647
WBGene00003409	-2.88291
WBGene00016880	-2.88092
WBGene00001666	-2.8724
WBGene00015830	-2.86061
WBGene00077728	-2.85756
WBGene00017737	-2.85021
WBGene00013602	-2.84999
WBGene00010365	-2.84876
WBGene00050929	-2.84553
WBGene00021458	-2.84341
WBGene00014807	-2.83188
WBGene00004778	-2.82947
WBGene00010483	-2.8281
WBGene00012445	-2.81855
WBGene00020371	-2.81395
WBGene00020363	-2.80495
WBGene00012899	-2.80208
WBGene00017303	-2.79902
WBGene00010726	-2.76998
WBGene00022511	-2.76687
WBGene00018929	-2.76161
WBGene00010804	-2.76128
WBGene00007926	-2.75289
WBGene00014148	-2.7426
WBGene00012717	-2.7396
WBGene00007672	-2.73703
WBGene00012699	-2.72877
WBGene00021008	-2.72483
WBGene00013288	-2.72282
WBGene00012289	-2.71535
WBGene00022307	-2.70128
WBGene00022519	-2.69907
WBGene00017100	-2.69662
WBGene00020560	-2.6903
WBGene00022443	-2.68159
WBGene00010587	-2.68011
WBGene00014206	-2.67752
WBGene00001468	-2.67429
WBGene00045043	-2.67349
WBGene00043990	-2.66979
WBGene00005191	-2.65377
WBGene00000819	-2.6511
WBGene00003976	-2.65108
WBGene00004120	-2.64487
WBGene00016997	-2.64011
WBGene00011626	-2.63675
WBGene00003848	-2.63621
WBGene00000210	-2.62312
WBGene00077756	-2.61286
WBGene00189948	-2.59766
WBGene00007079	-2.59733
WBGene00016030	-2.59537
WBGene00018933	-2.59077
WBGene00010371	-2.58745
WBGene00016486	-2.58597
WBGene00006784	-2.58247
WBGene00077666	-2.55349
WBGene00006570	-2.54242
WBGene00220089	-2.54202
WBGene00019959	-2.53933
WBGene00020473	-2.53885
WBGene00043989	-2.53723
WBGene00012549	-2.53662
WBGene00003959	-2.53334
WBGene00015896	-2.52939
WBGene00013009	-2.52436
WBGene00018878	-2.5242
WBGene00219553	-2.52263
WBGene00020630	-2.51964
WBGene00044000	-2.51551
WBGene00007453	-2.5143
WBGene00012096	-2.51416
WBGene00018439	-2.51392
WBGene00022225	-2.50921
WBGene00044560	-2.50428
WBGene00195253	-2.49847
WBGene00017533	-2.4942
WBGene00012486	-2.49407
WBGene00005147	-2.48858
WBGene00043992	-2.48717
WBGene00008695	-2.47277
WBGene00018813	-2.46915
WBGene00015644	-2.46882
WBGene00010984	-2.46684
WBGene00006922	-2.46587
WBGene00235370	-2.46511
WBGene00007679	-2.46342
WBGene00021913	-2.45949
WBGene00021075	-2.45716
WBGene00022608	-2.45644
WBGene00008973	-2.45566
WBGene00007076	-2.45448
WBGene00012848	-2.4515
WBGene00012554	-2.44509
WBGene00020540	-2.43605
WBGene00001548	-2.43
WBGene00002151	-2.4287
WBGene00012442	-2.42731
WBGene00021353	-2.41818
WBGene00012492	-2.40888
WBGene00009635	-2.40545
WBGene00013408	-2.40357
WBGene00018606	-2.39932
WBGene00044414	-2.39795
WBGene00018943	-2.39325
WBGene00007849	-2.39223
WBGene00004148	-2.39209
WBGene00013410	-2.39205
WBGene00017536	-2.38539
WBGene00010177	-2.38277
WBGene00011393	-2.37445
WBGene00022237	-2.37383
WBGene00010585	-2.3649
WBGene00020451	-2.36201
WBGene00206474	-2.36128
WBGene00012911	-2.36042
WBGene00018593	-2.36012
WBGene00010491	-2.35516
WBGene00016823	-2.35309
WBGene00019938	-2.35242
WBGene00016758	-2.34625
WBGene00009361	-2.34496
WBGene00020318	-2.33307
WBGene00044443	-2.3252
WBGene00023498	-2.32241
WBGene00008945	-2.32201
WBGene00000022	-2.32189
WBGene00014102	-2.31748
WBGene00011971	-2.31666
WBGene00012847	-2.31652
WBGene00014902	-2.30452
WBGene00219558	-2.29363
WBGene00001764	-2.29024
WBGene00004245	-2.28605
WBGene00013613	-2.28491
WBGene00009917	-2.28187
WBGene00001583	-2.28186
WBGene00015096	-2.27765
WBGene00012158	-2.27716
WBGene00016885	-2.27533
WBGene00022311	-2.27523
WBGene00016558	-2.27453
WBGene00013370	-2.26902
WBGene00013672	-2.26088
WBGene00007941	-2.25988
WBGene00219734	-2.25936
WBGene00002220	-2.2532
WBGene00009657	-2.25088
WBGene00020486	-2.24971
WBGene00003520	-2.24378
WBGene00219317	-2.24208
WBGene00008568	-2.23971
WBGene00022682	-2.2396
WBGene00002088	-2.23822
WBGene00220205	-2.23768
WBGene00005387	-2.23407
WBGene00018671	-2.23336
WBGene00012227	-2.233
WBGene00018768	-2.23206
WBGene00019905	-2.22576
WBGene00011365	-2.22335
WBGene00008353	-2.21113
WBGene00021319	-2.19811
WBGene00220011	-2.19306
WBGene00010703	-2.18243
WBGene00018204	-2.18205
WBGene00022497	-2.17695
WBGene00009437	-2.16926
WBGene00012238	-2.16876
WBGene00012759	-2.16619
WBGene00009558	-2.16555
WBGene00013773	-2.16029
WBGene00044268	-2.15841
WBGene00019159	-2.15385
WBGene00020450	-2.15259
WBGene00008728	-2.15244
WBGene00017423	-2.14433
WBGene00000207	-2.14229
WBGene00021079	-2.14133
WBGene00011591	-2.13805
WBGene00007899	-2.13685
WBGene00006640	-2.13454
WBGene00018436	-2.13427
WBGene00018577	-2.13403
WBGene00196365	-2.13007
WBGene00007855	-2.12779
WBGene00020793	-2.12679
WBGene00009697	-2.12512
WBGene00002246	-2.12053
WBGene00000294	-2.11134
WBGene00206391	-2.1097
WBGene00022745	-2.10719
WBGene00021505	-2.10618
WBGene00021790	-2.10144
WBGene00018704	-2.10138
WBGene00007165	-2.09471
WBGene00018663	-2.09419
WBGene00023209	-2.09378
WBGene00015115	-2.09195
WBGene00008527	-2.09085
WBGene00021678	-2.0896
WBGene00020756	-2.08572
WBGene00005903	-2.08571
WBGene00011388	-2.07524
WBGene00018804	-2.07488
WBGene00018075	-2.07258
WBGene00021654	-2.069
WBGene00017252	-2.06506
WBGene00016264	-2.06432
WBGene00010690	-2.0512
WBGene00003600	-2.04667
WBGene00007395	-2.04576
WBGene00018770	-2.04507
WBGene00020797	-2.04436
WBGene00010111	-2.04088
WBGene00013623	-2.0407
WBGene00013233	-2.03912
WBGene00008690	-2.03817
WBGene00021835	-2.03811
WBGene00011465	-2.03588
WBGene00022555	-2.03152
WBGene00017419	-2.03069
WBGene00015407	-2.02753
WBGene00007771	-2.02294
WBGene00016346	-2.02195
WBGene00014106	-2.0164
WBGene00013563	-2.01465
WBGene00019589	-2.01065
WBGene00012854	-2.00451
WBGene00007119	-2.00335
WBGene00012239	-2.00156
WBGene00235289	-2.00114
WBGene00021096	-1.9959
WBGene00018767	-1.99479
WBGene00220078	-1.99465
WBGene00012796	-1.99026
WBGene00012240	-1.98976
WBGene00003638	-1.9849
WBGene00206419	-1.98427
WBGene00197474	-1.98407
WBGene00000462	-1.98145
WBGene00021193	-1.97843
WBGene00009696	-1.97644
WBGene00011771	-1.97413
WBGene00013777	-1.97336
WBGene00014920	-1.97192
WBGene00004816	-1.96969
WBGene00043534	-1.96852
WBGene00013440	-1.96474
WBGene00001995	-1.96261
WBGene00044220	-1.95926
WBGene00017900	-1.95076
WBGene00018760	-1.94614
WBGene00000959	-1.94501
WBGene00220149	-1.94452
WBGene00013352	-1.94281
WBGene00009126	-1.93871
WBGene00019035	-1.93634
WBGene00010989	-1.93495
WBGene00044371	-1.92949
WBGene00011456	-1.92547
WBGene00021301	-1.92541
WBGene00007984	-1.92436
WBGene00021039	-1.92122
WBGene00021927	-1.91958
WBGene00219218	-1.91869
WBGene00019420	-1.91826
WBGene00019266	-1.91674
WBGene00014061	-1.91671
WBGene00009468	-1.91578
WBGene00008500	-1.9101
WBGene00018455	-1.9072
WBGene00013698	-1.90445
WBGene00000460	-1.90338
WBGene00008930	-1.89842
WBGene00013234	-1.89188
WBGene00009044	-1.8907
WBGene00011139	-1.88847
WBGene00044504	-1.88794
WBGene00017944	-1.88776
WBGene00016490	-1.88307
WBGene00011809	-1.88212
WBGene00007928	-1.87922
WBGene00022951	-1.8757
WBGene00044468	-1.87527
WBGene00017405	-1.87309
WBGene00007850	-1.87239
WBGene00011829	-1.87228
WBGene00013509	-1.87204
WBGene00022843	-1.87181
WBGene00009280	-1.86565
WBGene00010066	-1.86386
WBGene00020744	-1.86291
WBGene00010028	-1.8564
WBGene00016206	-1.85432
WBGene00044693	-1.85022
WBGene00019871	-1.84619
WBGene00011803	-1.84219
WBGene00018193	-1.84205
WBGene00012490	-1.83773
WBGene00005257	-1.8373
WBGene00007769	-1.83358
WBGene00015601	-1.831
WBGene00008996	-1.83081
WBGene00002978	-1.83071
WBGene00044482	-1.82927
WBGene00019705	-1.82812
WBGene00016469	-1.81873
WBGene00011129	-1.81849
WBGene00020373	-1.8011
WBGene00086555	-1.79996
WBGene00015153	-1.79949
WBGene00008929	-1.79612
WBGene00016230	-1.79415
WBGene00009846	-1.79158
WBGene00021264	-1.78715
WBGene00017627	-1.78365
WBGene00010858	-1.78242
WBGene00219721	-1.78054
WBGene00004745	-1.78034
WBGene00007055	-1.77965
WBGene00008949	-1.77771
WBGene00206511	-1.77581
WBGene00021817	-1.77419
WBGene00011200	-1.76866
WBGene00016216	-1.76773
WBGene00016295	-1.76509
WBGene00016871	-1.76354
WBGene00007798	-1.76336
WBGene00013429	-1.76276
WBGene00017069	-1.75467
WBGene00022039	-1.74935
WBGene00007988	-1.7472
WBGene00022312	-1.74705
WBGene00019863	-1.74637
WBGene00016344	-1.73929
WBGene00013620	-1.73787
WBGene00002253	-1.73702
WBGene00021509	-1.73609
WBGene00220130	-1.73433
WBGene00006894	-1.73113
WBGene00019875	-1.72328
WBGene00001523	-1.71818
WBGene00014099	-1.70754
WBGene00001520	-1.7075
WBGene00013615	-1.70352
WBGene00008622	-1.70116
WBGene00016012	-1.69308
WBGene00016110	-1.69092
WBGene00013511	-1.69007
WBGene00009730	-1.68725
WBGene00022559	-1.68126
WBGene00014041	-1.67162
WBGene00044760	-1.67028
WBGene00008476	-1.66967
WBGene00010311	-1.66624
WBGene00011777	-1.66599
WBGene00006353	-1.66377
WBGene00044503	-1.66352
WBGene00013249	-1.66303
WBGene00014672	-1.65689
WBGene00008986	-1.65278
WBGene00017152	-1.65021
WBGene00022334	-1.65001
WBGene00015955	-1.6497
WBGene00003593	-1.64773
WBGene00011398	-1.64663
WBGene00008782	-1.64431
WBGene00019611	-1.6443
WBGene00010448	-1.64412
WBGene00022485	-1.64387
WBGene00008858	-1.64089
WBGene00004352	-1.63898
WBGene00017189	-1.63778
WBGene00008177	-1.63445
WBGene00014826	-1.6337
WBGene00044637	-1.63191
WBGene00017344	-1.63148
WBGene00013230	-1.63044
WBGene00014090	-1.6289
WBGene00269431	-1.62786
WBGene00194725	-1.62308
WBGene00044218	-1.61569
WBGene00016345	-1.61564
WBGene00013158	-1.61453
WBGene00268204	-1.60432
WBGene00010204	-1.60328
WBGene00012731	-1.60128
WBGene00015158	-1.59943
WBGene00017639	-1.59917
WBGene00009020	-1.59732
WBGene00014870	-1.59682
WBGene00017698	-1.59662
WBGene00014871	-1.59543
WBGene00194956	-1.59521
WBGene00014987	-1.59011
WBGene00017729	-1.58971
WBGene00045056	-1.58935
WBGene00014069	-1.58719
WBGene00017890	-1.58324
WBGene00009698	-1.58207
WBGene00008922	-1.58175
WBGene00009721	-1.58106
WBGene00013816	-1.58031
WBGene00022432	-1.57821
WBGene00013184	-1.57772
WBGene00015371	-1.57657
WBGene00014858	-1.57563
WBGene00008819	-1.56801
WBGene00013510	-1.56783
WBGene00017556	-1.56754
WBGene00009224	-1.56621
WBGene00020730	-1.56529
WBGene00235272	-1.5647
WBGene00018238	-1.56391
WBGene00019442	-1.56195
WBGene00008090	-1.56036
WBGene00019789	-1.56011
WBGene00017188	-1.55134
WBGene00044034	-1.55096
WBGene00023245	-1.54959
WBGene00012632	-1.54539
WBGene00015429	-1.53601
WBGene00004423	-1.53504
WBGene00013062	-1.53487
WBGene00013944	-1.53404
WBGene00000982	-1.52955
WBGene00000554	-1.52833
WBGene00022712	-1.5269
WBGene00219315	-1.5264
WBGene00015569	-1.5256
WBGene00044486	-1.52493
WBGene00007124	-1.52222
WBGene00012953	-1.52054
WBGene00014822	-1.52036
WBGene00077646	-1.51602
WBGene00018615	-1.51549
WBGene00018837	-1.51388
WBGene00000803	-1.51343
WBGene00206532	-1.51231
WBGene00004321	-1.51159
WBGene00022274	-1.51138
WBGene00219728	-1.51018
WBGene00000636	-1.5073
WBGene00015796	-1.50466
WBGene00016485	-1.5016
WBGene00018761	-1.50125
WBGene00194998	-1.49972
WBGene00013917	-1.4984
WBGene00001335	-1.49794
WBGene00009380	-1.49771
WBGene00000393	-1.49503
WBGene00219736	-1.49479
WBGene00045315	-1.4845
WBGene00006423	-1.48248
WBGene00023404	-1.48198
WBGene00013618	-1.47902
WBGene00010148	-1.47525
WBGene00021040	-1.47143
WBGene00008398	-1.47117
WBGene00044585	-1.46977
WBGene00012107	-1.46645
WBGene00016544	-1.46471
WBGene00022607	-1.46315
WBGene00003970	-1.4629
WBGene00009658	-1.45648
WBGene00018186	-1.45051
WBGene00007886	-1.45033
WBGene00010704	-1.44877
WBGene00044768	-1.44449
WBGene00007063	-1.44293
WBGene00007213	-1.44037
WBGene00007920	-1.43901
WBGene00018647	-1.4388
WBGene00016307	-1.43782
WBGene00018634	-1.43689
WBGene00019624	-1.43495
WBGene00019864	-1.42773
WBGene00219756	-1.42746
WBGene00017711	-1.42743
WBGene00010921	-1.42707
WBGene00198215	-1.4244
WBGene00013617	-1.42355
WBGene00019700	-1.42189
WBGene00195034	-1.41737
WBGene00010339	-1.41701
WBGene00022569	-1.41669
WBGene00013244	-1.41223
WBGene00011267	-1.41121
WBGene00219931	-1.41054
WBGene00019142	-1.40623
WBGene00044372	-1.40465
WBGene00008587	-1.40219
WBGene00015020	-1.40189
WBGene00199724	-1.39946
WBGene00017402	-1.39014
WBGene00014906	-1.38834
WBGene00019872	-1.38807
WBGene00164985	-1.38516
WBGene00016131	-1.38358
WBGene00021672	-1.38069
WBGene00021976	-1.37768
WBGene00044675	-1.37667
WBGene00219687	-1.3766
WBGene00020455	-1.37452
WBGene00077490	-1.37206
WBGene00050935	-1.37159
WBGene00010417	-1.36983
WBGene00045052	-1.36975
WBGene00013537	-1.36896
WBGene00016319	-1.3682
WBGene00196500	-1.36644
WBGene00021531	-1.36633
WBGene00013501	-1.36561
WBGene00235090	-1.36417
WBGene00019082	-1.36403
WBGene00045302	-1.36345
WBGene00015430	-1.36256
WBGene00019569	-1.36125
WBGene00008975	-1.3572
WBGene00021542	-1.35595
WBGene00020834	-1.35202
WBGene00045203	-1.34991
WBGene00009018	-1.34887
WBGene00003648	-1.34392
WBGene00019250	-1.34351
WBGene00009630	-1.34296
WBGene00011497	-1.3392
WBGene00021345	-1.33575
WBGene00018690	-1.33344
WBGene00022215	-1.3325
WBGene00022736	-1.33122
WBGene00017979	-1.33051
WBGene00015037	-1.32826
WBGene00008537	-1.32592
WBGene00016487	-1.32446
WBGene00044038	-1.32168
WBGene00021274	-1.31853
WBGene00219424	-1.30978
WBGene00044702	-1.30953
WBGene00003624	-1.30686
WBGene00044134	-1.30602
WBGene00007813	-1.30556
WBGene00012610	-1.30507
WBGene00000221	-1.30474
WBGene00007680	-1.30011
WBGene00194836	-1.29921
WBGene00015989	-1.29875
WBGene00015534	-1.29829
WBGene00002977	-1.2979
WBGene00015888	-1.2973
WBGene00011531	-1.29466
WBGene00013500	-1.29325
WBGene00013982	-1.2928
WBGene00016299	-1.29236
WBGene00013074	-1.29182
WBGene00021547	-1.28783
WBGene00000775	-1.28328
WBGene00011791	-1.2821
WBGene00010100	-1.27927
WBGene00001680	-1.27805
WBGene00016029	-1.27297
WBGene00019441	-1.27049
WBGene00006985	-1.26714
WBGene00013248	-1.26596
WBGene00010433	-1.26278
WBGene00019491	-1.25987
WBGene00007391	-1.25962
WBGene00014082	-1.25901
WBGene00002181	-1.25882
WBGene00016985	-1.25864
WBGene00009812	-1.25729
WBGene00194812	-1.25395
WBGene00009865	-1.25239
WBGene00016639	-1.24916
WBGene00022067	-1.24782
WBGene00197009	-1.24387
WBGene00021885	-1.2437
WBGene00016067	-1.24161
WBGene00012922	-1.23992
WBGene00021977	-1.23783
WBGene00008937	-1.2366
WBGene00019069	-1.22655
WBGene00077712	-1.22636
WBGene00016585	-1.21742
WBGene00011733	-1.21257
WBGene00012124	-1.21039
WBGene00007417	-1.20653
WBGene00012909	-1.20056
WBGene00009233	-1.20022
WBGene00045131	-1.19959
WBGene00006928	-1.19787
WBGene00015887	-1.19686
WBGene00023497	-1.19661
WBGene00017082	-1.19256
WBGene00219749	-1.19204
WBGene00008349	-1.19021
WBGene00015514	-1.19016
WBGene00011757	-1.18849
WBGene00020496	-1.18432
WBGene00013100	-1.18405
WBGene00020852	-1.17972
WBGene00022205	-1.17874
WBGene00012786	-1.17838
WBGene00013859	-1.17714
WBGene00022512	-1.1734
WBGene00006351	-1.17335
WBGene00004893	-1.17264
WBGene00013180	-1.17069
WBGene00010102	-1.1702
WBGene00017291	-1.16662
WBGene00019189	-1.16412
WBGene00194896	-1.16189
WBGene00022198	-1.16079
WBGene00007667	-1.16013
WBGene00001671	-1.15867
WBGene00023491	-1.15556
WBGene00003750	-1.15419
WBGene00018442	-1.15163
WBGene00011606	-1.15137
WBGene00015895	-1.15115
WBGene00005961	-1.14893
WBGene00022726	-1.14505
WBGene00015914	-1.13919
WBGene00014944	-1.13726
WBGene00219206	-1.13423
WBGene00018537	-1.13085
WBGene00020817	-1.12796
WBGene00019535	-1.12602
WBGene00021658	-1.12488
WBGene00014956	-1.12448
WBGene00011094	-1.12412
WBGene00020678	-1.12201
WBGene00021656	-1.12158
WBGene00021726	-1.12001
WBGene00017422	-1.1199
WBGene00022354	-1.11776
WBGene00017259	-1.1146
WBGene00020407	-1.11403
WBGene00018456	-1.11362
WBGene00011680	-1.11119
WBGene00008620	-1.11083
WBGene00011131	-1.10985
WBGene00012103	-1.10781
WBGene00016641	-1.10716
WBGene00014130	-1.1054
WBGene00019381	-1.10452
WBGene00016678	-1.1025
WBGene00009310	-1.10178
WBGene00021051	-1.0998
WBGene00014213	-1.09756
WBGene00045077	-1.09678
WBGene00007846	-1.0912
WBGene00000912	-1.09072
WBGene00206377	-1.09063
WBGene00019030	-1.08761
WBGene00014746	-1.08761
WBGene00013403	-1.08746
WBGene00220222	-1.08711
WBGene00003911	-1.08691
WBGene00009572	-1.08665
WBGene00020612	-1.08314
WBGene00219490	-1.0814
WBGene00045277	-1.07471
WBGene00001325	-1.07086
WBGene00021893	-1.06939
WBGene00009801	-1.06854
WBGene00000374	-1.06517
WBGene00006927	-1.06417
WBGene00023421	-1.06374
WBGene00008446	-1.06106
WBGene00022308	-1.06063
WBGene00044692	-1.05896
WBGene00017413	-1.05289
WBGene00001196	-1.05287
WBGene00010362	-1.0503
WBGene00016695	-1.05013
WBGene00015321	-1.04808
WBGene00000074	-1.04807
WBGene00015124	-1.04772
WBGene00015647	-1.04737
WBGene00012290	-1.04614
WBGene00019598	-1.04586
WBGene00016703	-1.043
WBGene00013222	-1.04092
WBGene00012967	-1.03779
WBGene00009161	-1.0375
WBGene00021739	-1.03531
WBGene00013799	-1.0345
WBGene00020256	-1.03284
WBGene00007900	-1.03276
WBGene00001994	-1.03246
WBGene00016561	-1.03244
WBGene00001025	-1.03205
WBGene00004933	-1.02824
WBGene00008823	-1.02718
WBGene00020669	-1.02711
WBGene00020778	-1.02659
WBGene00020212	-1.02585
WBGene00020673	-1.02445
WBGene00021898	-1.02352
WBGene00009453	-1.02083
WBGene00020527	-1.02073
WBGene00022366	-1.02014
WBGene00019578	-1.01571
WBGene00005223	-1.0137
WBGene00009142	-1.01257
WBGene00012831	-1.00651
WBGene00017942	-1.00627
WBGene00000178	-1.00361
WBGene00000727	-1.00327
WBGene00194651	-1.00293
WBGene00019302	-1.00058
WBGene00022110	-1.00039

## Sheet: simr-1 20C up
Supplementary File 3, Sheet 3. Small RNAs significantly up-regulated 2 fold or greater in simr-1 mutant animals at 20ºC.
Gene name	log2FoldChange
WBGene00003385	5.40422
WBGene00021986	5.31184
WBGene00017153	5.0897
WBGene00021020	5.04779
WBGene00001935	5.00713
WBGene00012673	4.80379
WBGene00001791	4.6524
WBGene00018720	4.63457
WBGene00000232	4.61981
WBGene00012867	4.60509
WBGene00013587	4.55374
WBGene00010768	4.53252
WBGene00000401	4.08051
WBGene00017818	3.99057
WBGene00001895	3.97158
WBGene00019094	3.94071
WBGene00006508	3.87731
WBGene00016492	3.8749
WBGene00019096	3.82771
WBGene00199162	3.77094
WBGene00020183	3.74246
WBGene00019997	3.73348
WBGene00001925	3.709
WBGene00001893	3.66615
WBGene00021340	3.62277
WBGene00016763	3.59601
WBGene00001881	3.48735
WBGene00001906	3.47434
WBGene00017101	3.45642
WBGene00016540	3.44015
WBGene00011291	3.40816
WBGene00200004	3.33684
WBGene00018842	3.32538
WBGene00014259	3.24635
WBGene00021808	3.23183
WBGene00006771	3.21115
WBGene00011812	3.19295
WBGene00001942	3.12822
WBGene00001119	3.08323
WBGene00010294	3.07034
WBGene00000237	3.05031
WBGene00001927	3.01365
WBGene00015488	2.96145
WBGene00018330	2.91648
WBGene00001890	2.81807
WBGene00015477	2.81756
WBGene00001907	2.81574
WBGene00007281	2.78148
WBGene00021357	2.76342
WBGene00008698	2.75709
WBGene00008779	2.74583
WBGene00016953	2.7413
WBGene00001877	2.69367
WBGene00000113	2.67606
WBGene00000224	2.67177
WBGene00021809	2.65092
WBGene00017796	2.64708
WBGene00001931	2.61652
WBGene00001886	2.59998
WBGene00001904	2.59909
WBGene00019588	2.53526
WBGene00001939	2.44533
WBGene00019636	2.43947
WBGene00002048	2.42083
WBGene00044588	2.41491
WBGene00012191	2.41313
WBGene00001921	2.39985
WBGene00001899	2.39491
WBGene00012462	2.36925
WBGene00012237	2.32085
WBGene00003533	2.30398
WBGene00015765	2.2793
WBGene00015229	2.26489
WBGene00007752	2.23498
WBGene00001917	2.22354
WBGene00006062	2.2198
WBGene00022589	2.20703
WBGene00022165	2.19155
WBGene00001131	2.18375
WBGene00010295	2.1518
WBGene00003235	2.1203
WBGene00019994	2.10384
WBGene00011805	2.08222
WBGene00012758	1.9999
WBGene00003941	1.98945
WBGene00012368	1.97724
WBGene00044961	1.96963
WBGene00021068	1.95575
WBGene00000057	1.92345
WBGene00003040	1.91696
WBGene00219822	1.91134
WBGene00015478	1.91039
WBGene00010079	1.90414
WBGene00016150	1.87973
WBGene00021482	1.87756
WBGene00004747	1.85652
WBGene00023291	1.85075
WBGene00022379	1.83381
WBGene00017061	1.82193
WBGene00013531	1.81713
WBGene00044413	1.79765
WBGene00043068	1.76436
WBGene00010293	1.76002
WBGene00006591	1.74889
WBGene00014955	1.73732
WBGene00007986	1.73292
WBGene00194682	1.7307
WBGene00016890	1.72023
WBGene00015987	1.69578
WBGene00219800	1.69196
WBGene00015344	1.6618
WBGene00012423	1.66118
WBGene00006561	1.65562
WBGene00004357	1.64256
WBGene00017461	1.64075
WBGene00001888	1.62792
WBGene00206421	1.62631
WBGene00017080	1.61393
WBGene00009370	1.61028
WBGene00016059	1.6068
WBGene00013419	1.60618
WBGene00000368	1.56424
WBGene00011205	1.56066
WBGene00196542	1.54606
WBGene00009713	1.52172
WBGene00021473	1.51892
WBGene00206422	1.5157
WBGene00013242	1.50674
WBGene00001910	1.50287
WBGene00023181	1.49672
WBGene00021799	1.48405
WBGene00001880	1.48001
WBGene00019915	1.4609
WBGene00001179	1.44911
WBGene00012198	1.44809
WBGene00010769	1.44403
WBGene00022213	1.43384
WBGene00000140	1.42979
WBGene00021107	1.42965
WBGene00021209	1.41582
WBGene00006819	1.41186
WBGene00012100	1.40423
WBGene00001883	1.39972
WBGene00021819	1.39844
WBGene00017186	1.39158
WBGene00003599	1.38752
WBGene00001900	1.36524
WBGene00004751	1.34742
WBGene00001884	1.3406
WBGene00010370	1.33812
WBGene00021939	1.33216
WBGene00001916	1.32829
WBGene00001887	1.32498
WBGene00019748	1.32471
WBGene00219399	1.31999
WBGene00045167	1.31841
WBGene00004053	1.27935
WBGene00002182	1.27419
WBGene00012564	1.26964
WBGene00045170	1.26308
WBGene00000034	1.26056
WBGene00009299	1.2481
WBGene00016995	1.24669
WBGene00000685	1.24534
WBGene00018145	1.2421
WBGene00011059	1.23647
WBGene00044461	1.23031
WBGene00019513	1.2174
WBGene00010756	1.21419
WBGene00196066	1.2105
WBGene00018664	1.2098
WBGene00001394	1.20924
WBGene00045169	1.20613
WBGene00021909	1.19527
WBGene00013358	1.18847
WBGene00007139	1.18715
WBGene00001915	1.17924
WBGene00007675	1.17642
WBGene00014420	1.17439
WBGene00006777	1.16477
WBGene00013001	1.15903
WBGene00021333	1.15796
WBGene00007779	1.14777
WBGene00002263	1.14622
WBGene00013162	1.14274
WBGene00189952	1.14106
WBGene00235377	1.13903
WBGene00001940	1.13402
WBGene00004809	1.12535
WBGene00017459	1.10398
WBGene00196056	1.10231
WBGene00235265	1.09978
WBGene00022564	1.0981
WBGene00002040	1.09795
WBGene00007085	1.09793
WBGene00016340	1.09009
WBGene00000463	1.08765
WBGene00022078	1.08701
WBGene00044940	1.083
WBGene00000497	1.08192
WBGene00013485	1.06749
WBGene00008726	1.06473
WBGene00021239	1.06321
WBGene00021331	1.06283
WBGene00219700	1.05371
WBGene00002230	1.05031
WBGene00007838	1.04772
WBGene00012703	1.04764
WBGene00002176	1.04105
WBGene00000177	1.03002
WBGene00016435	1.02397
WBGene00016415	1.01806
WBGene00001919	1.00496

## Sheet: simr-1 25C gen1 down
Supplementary File 3, Sheet 4: Small RNAs significantly down-regulated 2 fold or greater in simr-1 mutant animals at 25ºC for one generation.
Gene name	log2FoldChange
WBGene00022438	-7.40247
WBGene00017644	-6.85188
WBGene00019267	-6.32267
WBGene00001705	-6.1649
WBGene00017106	-5.77404
WBGene00003579	-5.60599
WBGene00012572	-5.56949
WBGene00016273	-5.53175
WBGene00001666	-5.52253
WBGene00019538	-5.51389
WBGene00017515	-5.39041
WBGene00195253	-5.38146
WBGene00019370	-5.36151
WBGene00022276	-5.35983
WBGene00013622	-5.31234
WBGene00022307	-5.29579
WBGene00008890	-5.20504
WBGene00017148	-5.17682
WBGene00010735	-5.12699
WBGene00000903	-5.10744
WBGene00012759	-5.09417
WBGene00012407	-5.08825
WBGene00007600	-5.07687
WBGene00021479	-5.07578
WBGene00007275	-5.05525
WBGene00013812	-5.02898
WBGene00002088	-5.01583
WBGene00001955	-4.99719
WBGene00013387	-4.97952
WBGene00019044	-4.96221
WBGene00003124	-4.94404
WBGene00013499	-4.89894
WBGene00013778	-4.88962
WBGene00008776	-4.88721
WBGene00014033	-4.83233
WBGene00019546	-4.80651
WBGene00010226	-4.74569
WBGene00004196	-4.74111
WBGene00019545	-4.7354
WBGene00014148	-4.64765
WBGene00020988	-4.64404
WBGene00022358	-4.62059
WBGene00015868	-4.61872
WBGene00021835	-4.60987
WBGene00017500	-4.60308
WBGene00044502	-4.59223
WBGene00003387	-4.55916
WBGene00017354	-4.53687
WBGene00219675	-4.53048
WBGene00012866	-4.52006
WBGene00009288	-4.51012
WBGene00019909	-4.4865
WBGene00018383	-4.48257
WBGene00013802	-4.48067
WBGene00004778	-4.45941
WBGene00011592	-4.45652
WBGene00014807	-4.44193
WBGene00007750	-4.43652
WBGene00018662	-4.43481
WBGene00007679	-4.43351
WBGene00009005	-4.43324
WBGene00007395	-4.37655
WBGene00012549	-4.37345
WBGene00017629	-4.36462
WBGene00002017	-4.34118
WBGene00021353	-4.33199
WBGene00022209	-4.32554
WBGene00018241	-4.31192
WBGene00269433	-4.30356
WBGene00009361	-4.29766
WBGene00021008	-4.29568
WBGene00017303	-4.28457
WBGene00007769	-4.27458
WBGene00015896	-4.26249
WBGene00009657	-4.25428
WBGene00013692	-4.25095
WBGene00007489	-4.23471
WBGene00022441	-4.23229
WBGene00013736	-4.19506
WBGene00022315	-4.18578
WBGene00012486	-4.16778
WBGene00001764	-4.15145
WBGene00005061	-4.14133
WBGene00007722	-4.13929
WBGene00012717	-4.13789
WBGene00013777	-4.11159
WBGene00002015	-4.10708
WBGene00021913	-4.10056
WBGene00007672	-4.08696
WBGene00012144	-4.08621
WBGene00003093	-4.07759
WBGene00016165	-4.06134
WBGene00023209	-4.06032
WBGene00219455	-4.05789
WBGene00008690	-4.05367
WBGene00019261	-4.05007
WBGene00021834	-4.04899
WBGene00022511	-4.04781
WBGene00017737	-4.04731
WBGene00002100	-4.03714
WBGene00002265	-4.0368
WBGene00011393	-4.03119
WBGene00015115	-4.02728
WBGene00000784	-4.01428
WBGene00020318	-4.00181
WBGene00044468	-4.00038
WBGene00007405	-3.99669
WBGene00013623	-3.99033
WBGene00012238	-3.96417
WBGene00020540	-3.95893
WBGene00045043	-3.94692
WBGene00017099	-3.94648
WBGene00021927	-3.93427
WBGene00219218	-3.925
WBGene00001745	-3.92488
WBGene00010976	-3.91728
WBGene00012239	-3.91102
WBGene00017225	-3.89612
WBGene00012854	-3.8961
WBGene00019665	-3.8934
WBGene00000781	-3.89105
WBGene00206474	-3.88977
WBGene00219317	-3.87675
WBGene00020473	-3.87159
WBGene00201351	-3.86982
WBGene00017100	-3.86753
WBGene00016550	-3.86507
WBGene00009697	-3.85349
WBGene00175029	-3.85233
WBGene00219413	-3.84467
WBGene00013830	-3.84437
WBGene00003480	-3.83904
WBGene00007984	-3.83098
WBGene00009044	-3.82869
WBGene00017944	-3.82696
WBGene00206419	-3.80754
WBGene00019899	-3.79467
WBGene00044530	-3.79
WBGene00018433	-3.78224
WBGene00044482	-3.77471
WBGene00196465	-3.77111
WBGene00012289	-3.76948
WBGene00011200	-3.76715
WBGene00016758	-3.76701
WBGene00008421	-3.76544
WBGene00013602	-3.7543
WBGene00044000	-3.7495
WBGene00021668	-3.74858
WBGene00018309	-3.74616
WBGene00015020	-3.7459
WBGene00007928	-3.74395
WBGene00007988	-3.74066
WBGene00021505	-3.73571
WBGene00014888	-3.73521
WBGene00017698	-3.73448
WBGene00077728	-3.7057
WBGene00206535	-3.69791
WBGene00021148	-3.69662
WBGene00219771	-3.69153
WBGene00043992	-3.67911
WBGene00017630	-3.67358
WBGene00012671	-3.66948
WBGene00010449	-3.66847
WBGene00044268	-3.65006
WBGene00002020	-3.64364
WBGene00009957	-3.64053
WBGene00018439	-3.64037
WBGene00011575	-3.63553
WBGene00015913	-3.63423
WBGene00007079	-3.62102
WBGene00000219	-3.61898
WBGene00086555	-3.61638
WBGene00002019	-3.61455
WBGene00019420	-3.60973
WBGene00012911	-3.60643
WBGene00014121	-3.6033
WBGene00006930	-3.58204
WBGene00006927	-3.58047
WBGene00020450	-3.57282
WBGene00194747	-3.56773
WBGene00008858	-3.56097
WBGene00009635	-3.55755
WBGene00012554	-3.55417
WBGene00009889	-3.54851
WBGene00043990	-3.53615
WBGene00021817	-3.53203
WBGene00009081	-3.53059
WBGene00021079	-3.52621
WBGene00007926	-3.52263
WBGene00014233	-3.52199
WBGene00016880	-3.51776
WBGene00020451	-3.51562
WBGene00015407	-3.51001
WBGene00220089	-3.50478
WBGene00021039	-3.50371
WBGene00011971	-3.49605
WBGene00044504	-3.49048
WBGene00018929	-3.48892
WBGene00021976	-3.4713
WBGene00021458	-3.46926
WBGene00022642	-3.4687
WBGene00005387	-3.4614
WBGene00009917	-3.46097
WBGene00009495	-3.45628
WBGene00020486	-3.45426
WBGene00018933	-3.45347
WBGene00007213	-3.45252
WBGene00013613	-3.44787
WBGene00007153	-3.4443
WBGene00007076	-3.43418
WBGene00194681	-3.43297
WBGene00022497	-3.42817
WBGene00003090	-3.42731
WBGene00007941	-3.42086
WBGene00044414	-3.41718
WBGene00021547	-3.41437
WBGene00015111	-3.40213
WBGene00020256	-3.39863
WBGene00022298	-3.39778
WBGene00008353	-3.39393
WBGene00050929	-3.37887
WBGene00009558	-3.37719
WBGene00000216	-3.37197
WBGene00012710	-3.36836
WBGene00022311	-3.36664
WBGene00011626	-3.36504
WBGene00013773	-3.36128
WBGene00012699	-3.34867
WBGene00011672	-3.33093
WBGene00008728	-3.32906
WBGene00000982	-3.32552
WBGene00013429	-3.32437
WBGene00013563	-3.30774
WBGene00000214	-3.30318
WBGene00043989	-3.29769
WBGene00015735	-3.29019
WBGene00011777	-3.28971
WBGene00022225	-3.27889
WBGene00019159	-3.27679
WBGene00195034	-3.27493
WBGene00008945	-3.26212
WBGene00021096	-3.25566
WBGene00000819	-3.23906
WBGene00009020	-3.22799
WBGene00021790	-3.2253
WBGene00017979	-3.223
WBGene00001638	-3.22136
WBGene00000959	-3.22033
WBGene00022843	-3.21943
WBGene00007119	-3.21024
WBGene00006784	-3.20556
WBGene00018804	-3.20537
WBGene00014944	-3.20487
WBGene00012096	-3.20412
WBGene00007453	-3.19918
WBGene00013009	-3.19791
WBGene00006962	-3.19682
WBGene00021301	-3.19654
WBGene00012570	-3.19539
WBGene00219553	-3.1856
WBGene00022682	-3.1839
WBGene00006929	-3.17903
WBGene00008986	-3.17229
WBGene00021260	-3.16437
WBGene00000535	-3.15497
WBGene00011809	-3.15043
WBGene00009468	-3.14358
WBGene00013509	-3.14335
WBGene00003091	-3.14217
WBGene00010585	-3.13871
WBGene00017900	-3.13165
WBGene00017533	-3.12842
WBGene00219206	-3.12826
WBGene00018634	-3.12121
WBGene00000518	-3.11958
WBGene00012290	-3.11742
WBGene00018761	-3.11712
WBGene00009865	-3.10362
WBGene00006928	-3.10311
WBGene00013158	-3.09605
WBGene00235300	-3.09569
WBGene00195024	-3.09055
WBGene00194667	-3.08275
WBGene00010365	-3.07878
WBGene00045366	-3.07386
WBGene00008922	-3.06209
WBGene00045056	-3.05603
WBGene00014906	-3.05445
WBGene00014206	-3.05295
WBGene00195023	-3.04706
WBGene00021768	-3.04702
WBGene00018608	-3.03891
WBGene00269431	-3.03835
WBGene00012615	-3.0371
WBGene00016544	-3.03625
WBGene00014920	-3.03593
WBGene00004377	-3.03529
WBGene00015096	-3.02913
WBGene00206511	-3.02745
WBGene00206532	-3.02289
WBGene00195022	-3.02096
WBGene00021678	-3.01553
WBGene00019030	-3.0155
WBGene00009730	-3.01376
WBGene00004933	-3.01357
WBGene00000402	-3.00146
WBGene00015887	-2.9986
WBGene00015492	-2.99729
WBGene00022519	-2.9875
WBGene00236806	-2.98458
WBGene00008714	-2.97929
WBGene00010726	-2.97622
WBGene00013222	-2.97556
WBGene00044467	-2.9732
WBGene00014090	-2.97168
WBGene00021274	-2.96827
WBGene00023404	-2.96441
WBGene00016299	-2.96354
WBGene00010587	-2.9635
WBGene00021654	-2.96298
WBGene00077772	-2.96285
WBGene00015153	-2.95253
WBGene00235370	-2.95137
WBGene00010204	-2.95102
WBGene00013352	-2.93684
WBGene00022951	-2.92985
WBGene00009142	-2.92857
WBGene00012970	-2.92623
WBGene00014106	-2.91566
WBGene00006640	-2.90603
WBGene00017189	-2.90342
WBGene00014207	-2.90001
WBGene00008500	-2.88738
WBGene00014041	-2.88727
WBGene00013501	-2.88643
WBGene00016206	-2.88293
WBGene00021193	-2.88259
WBGene00008602	-2.88238
WBGene00006570	-2.87947
WBGene00017631	-2.87087
WBGene00017419	-2.8616
WBGene00004827	-2.86059
WBGene00020793	-2.85777
WBGene00219766	-2.85283
WBGene00010066	-2.85041
WBGene00022608	-2.84574
WBGene00009437	-2.84481
WBGene00007354	-2.83167
WBGene00012796	-2.82967
WBGene00013776	-2.82688
WBGene00008695	-2.82688
WBGene00019959	-2.82174
WBGene00018690	-2.81907
WBGene00016641	-2.81713
WBGene00219721	-2.8162
WBGene00018593	-2.81569
WBGene00018186	-2.81277
WBGene00021987	-2.81272
WBGene00017725	-2.8116
WBGene00022691	-2.80908
WBGene00001523	-2.80826
WBGene00249813	-2.80649
WBGene00011829	-2.80539
WBGene00019170	-2.80482
WBGene00020730	-2.80468
WBGene00008568	-2.80259
WBGene00004120	-2.80159
WBGene00007899	-2.79068
WBGene00045387	-2.78227
WBGene00011365	-2.77857
WBGene00018837	-2.77264
WBGene00019442	-2.76412
WBGene00017405	-2.76081
WBGene00015601	-2.75561
WBGene00016871	-2.75509
WBGene00017453	-2.74673
WBGene00007419	-2.74521
WBGene00012909	-2.74299
WBGene00044261	-2.73953
WBGene00003786	-2.73331
WBGene00000554	-2.73235
WBGene00014292	-2.73228
WBGene00022712	-2.73138
WBGene00011733	-2.73104
WBGene00012981	-2.72889
WBGene00016661	-2.72869
WBGene00194913	-2.70547
WBGene00018193	-2.70359
WBGene00007165	-2.70201
WBGene00014561	-2.69889
WBGene00195028	-2.69305
WBGene00013062	-2.69233
WBGene00016110	-2.68728
WBGene00000207	-2.68364
WBGene00014598	-2.68188
WBGene00022435	-2.67839
WBGene00219699	-2.67487
WBGene00022039	-2.67361
WBGene00010043	-2.67303
WBGene00021966	-2.67136
WBGene00018577	-2.66288
WBGene00020669	-2.65329
WBGene00022736	-2.6493
WBGene00219755	-2.64256
WBGene00010989	-2.63968
WBGene00015837	-2.63592
WBGene00022485	-2.6353
WBGene00014330	-2.63329
WBGene00013638	-2.63259
WBGene00010371	-2.62582
WBGene00020373	-2.62096
WBGene00013500	-2.61944
WBGene00044038	-2.61697
WBGene00194884	-2.61628
WBGene00045277	-2.61615
WBGene00011803	-2.6149
WBGene00019316	-2.61146
WBGene00020797	-2.60333
WBGene00013511	-2.59839
WBGene00008486	-2.59579
WBGene00235340	-2.59085
WBGene00044486	-2.58857
WBGene00003654	-2.58785
WBGene00219728	-2.58314
WBGene00020817	-2.57716
WBGene00011129	-2.57477
WBGene00021885	-2.57267
WBGene00020551	-2.57247
WBGene00019938	-2.57229
WBGene00194680	-2.57102
WBGene00006926	-2.57072
WBGene00012985	-2.56914
WBGene00014344	-2.56511
WBGene00077646	-2.56453
WBGene00015888	-2.56234
WBGene00007771	-2.56212
WBGene00044768	-2.56106
WBGene00016264	-2.54734
WBGene00010921	-2.5298
WBGene00189930	-2.52753
WBGene00015386	-2.52723
WBGene00194725	-2.52572
WBGene00012786	-2.5128
WBGene00012967	-2.50912
WBGene00000636	-2.50238
WBGene00013618	-2.50045
WBGene00044728	-2.50005
WBGene00021463	-2.49333
WBGene00015895	-2.4933
WBGene00016670	-2.48945
WBGene00219756	-2.48717
WBGene00016487	-2.48598
WBGene00011850	-2.48047
WBGene00014368	-2.4796
WBGene00018663	-2.47468
WBGene00008620	-2.47383
WBGene00018322	-2.47221
WBGene00010177	-2.47059
WBGene00006767	-2.46762
WBGene00014778	-2.46498
WBGene00016216	-2.46377
WBGene00043534	-2.46159
WBGene00044220	-2.45834
WBGene00019611	-2.45799
WBGene00014536	-2.45689
WBGene00008819	-2.45508
WBGene00013403	-2.44843
WBGene00219751	-2.44729
WBGene00050935	-2.44076
WBGene00015534	-2.44014
WBGene00014345	-2.43811
WBGene00018770	-2.43192
WBGene00016631	-2.43165
WBGene00021375	-2.43151
WBGene00022988	-2.4282
WBGene00018671	-2.42693
WBGene00016520	-2.42444
WBGene00013233	-2.42351
WBGene00018878	-2.42259
WBGene00022334	-2.42238
WBGene00014870	-2.42213
WBGene00012227	-2.41886
WBGene00008937	-2.41764
WBGene00013698	-2.41556
WBGene00008930	-2.41374
WBGene00020756	-2.4097
WBGene00016885	-2.40488
WBGene00010417	-2.40471
WBGene00195027	-2.39991
WBGene00018856	-2.39838
WBGene00206507	-2.39786
WBGene00006925	-2.39573
WBGene00000056	-2.3894
WBGene00021319	-2.38408
WBGene00012202	-2.38098
WBGene00014186	-2.37457
WBGene00010102	-2.36626
WBGene00014102	-2.36419
WBGene00021469	-2.36192
WBGene00019266	-2.36129
WBGene00021509	-2.36009
WBGene00000075	-2.35722
WBGene00219707	-2.35158
WBGene00003607	-2.35097
WBGene00019282	-2.34538
WBGene00022936	-2.34271
WBGene00201932	-2.34271
WBGene00009630	-2.34048
WBGene00021264	-2.33729
WBGene00194956	-2.33608
WBGene00019996	-2.32937
WBGene00014535	-2.32502
WBGene00001583	-2.32198
WBGene00022937	-2.3197
WBGene00001520	-2.3185
WBGene00016346	-2.31494
WBGene00016943	-2.31235
WBGene00219443	-2.30977
WBGene00013615	-2.30103
WBGene00000768	-2.30089
WBGene00018767	-2.29647
WBGene00008051	-2.28987
WBGene00021726	-2.28749
WBGene00010242	-2.28606
WBGene00013184	-2.28211
WBGene00021977	-2.28084
WBGene00006445	-2.27864
WBGene00004347	-2.27414
WBGene00007179	-2.27165
WBGene00199886	-2.26464
WBGene00195060	-2.26063
WBGene00200112	-2.26047
WBGene00021095	-2.25942
WBGene00009696	-2.25502
WBGene00002181	-2.2533
WBGene00013620	-2.25055
WBGene00197009	-2.25
WBGene00018768	-2.24875
WBGene00017687	-2.24787
WBGene00044705	-2.24773
WBGene00019569	-2.24582
WBGene00016029	-2.24415
WBGene00004148	-2.24394
WBGene00022446	-2.24
WBGene00200652	-2.23266
WBGene00021271	-2.23258
WBGene00008622	-2.22927
WBGene00044227	-2.22821
WBGene00005147	-2.22208
WBGene00021019	-2.22093
WBGene00050936	-2.2206
WBGene00195568	-2.2186
WBGene00018456	-2.21764
WBGene00000462	-2.2163
WBGene00009310	-2.21431
WBGene00014602	-2.21372
WBGene00018199	-2.20638
WBGene00013510	-2.20196
WBGene00019069	-2.20129
WBGene00023008	-2.1997
WBGene00012158	-2.1997
WBGene00014382	-2.19786
WBGene00014130	-2.19776
WBGene00011771	-2.19499
WBGene00023036	-2.19439
WBGene00022030	-2.19392
WBGene00016558	-2.19246
WBGene00008929	-2.19206
WBGene00023140	-2.1885
WBGene00013230	-2.18759
WBGene00003638	-2.18581
WBGene00013672	-2.18534
WBGene00022275	-2.18531
WBGene00044637	-2.18492
WBGene00012492	-2.18443
WBGene00019511	-2.18214
WBGene00023131	-2.18212
WBGene00220078	-2.18005
WBGene00006575	-2.17863
WBGene00045468	-2.17524
WBGene00013617	-2.175
WBGene00014956	-2.16875
WBGene00022131	-2.16631
WBGene00016585	-2.16404
WBGene00010100	-2.16076
WBGene00015518	-2.15964
WBGene00006344	-2.15811
WBGene00006353	-2.14886
WBGene00019208	-2.1477
WBGene00001704	-2.14687
WBGene00194896	-2.14041
WBGene00018075	-2.13926
WBGene00198924	-2.13807
WBGene00219315	-2.13752
WBGene00014411	-2.13695
WBGene00014858	-2.13502
WBGene00194923	-2.12849
WBGene00002977	-2.12455
WBGene00008226	-2.12421
WBGene00010623	-2.11983
WBGene00196907	-2.11869
WBGene00196500	-2.11489
WBGene00023138	-2.11366
WBGene00219634	-2.11341
WBGene00045052	-2.11073
WBGene00009043	-2.11044
WBGene00194650	-2.10376
WBGene00016177	-2.09896
WBGene00219758	-2.0981
WBGene00021244	-2.09698
WBGene00012452	-2.09685
WBGene00018615	-2.09122
WBGene00199628	-2.09114
WBGene00202153	-2.09101
WBGene00010690	-2.08179
WBGene00010984	-2.08055
WBGene00011531	-2.0796
WBGene00022110	-2.07902
WBGene00016703	-2.07196
WBGene00013100	-2.07151
WBGene00004745	-2.07025
WBGene00010779	-2.06611
WBGene00017729	-2.06495
WBGene00004245	-2.06097
WBGene00015351	-2.05915
WBGene00017069	-2.05525
WBGene00004423	-2.05452
WBGene00019372	-2.05125
WBGene00219490	-2.04955
WBGene00197809	-2.04824
WBGene00009018	-2.04819
WBGene00003750	-2.04627
WBGene00219748	-2.04503
WBGene00019871	-2.04164
WBGene00000460	-2.03819
WBGene00014871	-2.02953
WBGene00021531	-2.02915
WBGene00012107	-2.0277
WBGene00015371	-2.02648
WBGene00018496	-2.0222
WBGene00023032	-2.02056
WBGene00199724	-2.01854
WBGene00220130	-2.01668
WBGene00013799	-2.01631
WBGene00014591	-2.01286
WBGene00002056	-2.01155
WBGene00018204	-2.01105
WBGene00198544	-2.009
WBGene00235277	-2.00878
WBGene00000857	-2.00797
WBGene00016319	-2.00736
WBGene00219241	-2.00086
WBGene00001247	-2.0005
WBGene00012405	-1.99762
WBGene00018965	-1.99679
WBGene00014021	-1.99566
WBGene00009644	-1.99515
WBGene00012831	-1.99426
WBGene00195070	-1.99341
WBGene00022554	-1.99094
WBGene00012461	-1.98885
WBGene00004321	-1.98752
WBGene00014547	-1.9872
WBGene00012194	-1.98713
WBGene00017627	-1.98131
WBGene00020630	-1.97998
WBGene00023069	-1.9794
WBGene00016985	-1.97834
WBGene00018228	-1.97322
WBGene00014337	-1.97261
WBGene00023092	-1.97034
WBGene00014328	-1.96937
WBGene00009741	-1.96933
WBGene00077437	-1.96796
WBGene00003976	-1.96682
WBGene00012819	-1.96505
WBGene00021893	-1.96497
WBGene00022274	-1.96274
WBGene00007126	-1.96114
WBGene00002220	-1.96037
WBGene00018647	-1.96023
WBGene00013234	-1.95898
WBGene00012953	-1.95883
WBGene00022129	-1.958
WBGene00020753	-1.9558
WBGene00007717	-1.95378
WBGene00219749	-1.93893
WBGene00220258	-1.93522
WBGene00022354	-1.93296
WBGene00023170	-1.92945
WBGene00014904	-1.92887
WBGene00045053	-1.92677
WBGene00023178	-1.9186
WBGene00022915	-1.9164
WBGene00009380	-1.91432
WBGene00007523	-1.91345
WBGene00044134	-1.91285
WBGene00016639	-1.91174
WBGene00008446	-1.91098
WBGene00022973	-1.91045
WBGene00021614	-1.90964
WBGene00008447	-1.90823
WBGene00023005	-1.90313
WBGene00196365	-1.90272
WBGene00195867	-1.89931
WBGene00077558	-1.89839
WBGene00195233	-1.89499
WBGene00023011	-1.88852
WBGene00044436	-1.88036
WBGene00014327	-1.87965
WBGene00003593	-1.87803
WBGene00022914	-1.8767
WBGene00012159	-1.87579
WBGene00014352	-1.86973
WBGene00007920	-1.86616
WBGene00003664	-1.8658
WBGene00015321	-1.86064
WBGene00020254	-1.86044
WBGene00022967	-1.859
WBGene00000775	-1.85622
WBGene00015124	-1.85496
WBGene00008996	-1.8545
WBGene00017082	-1.85294
WBGene00023038	-1.85286
WBGene00020778	-1.85137
WBGene00021875	-1.85087
WBGene00022690	-1.8454
WBGene00023076	-1.84449
WBGene00012827	-1.84431
WBGene00020397	-1.84146
WBGene00198215	-1.83727
WBGene00197513	-1.83027
WBGene00013795	-1.82922
WBGene00199591	-1.82836
WBGene00200120	-1.82803
WBGene00018455	-1.82741
WBGene00023169	-1.82734
WBGene00014611	-1.82355
WBGene00197737	-1.82016
WBGene00020401	-1.81952
WBGene00007680	-1.81924
WBGene00008782	-1.81696
WBGene00045150	-1.81337
WBGene00021428	-1.81195
WBGene00008536	-1.81138
WBGene00014548	-1.81018
WBGene00023314	-1.8099
WBGene00021675	-1.80826
WBGene00009161	-1.80718
WBGene00015796	-1.80651
WBGene00220205	-1.80369
WBGene00000803	-1.80319
WBGene00023182	-1.80151
WBGene00019197	-1.80051
WBGene00010700	-1.79937
WBGene00013535	-1.79843
WBGene00020352	-1.79705
WBGene00023176	-1.79347
WBGene00044517	-1.793
WBGene00199059	-1.78711
WBGene00015231	-1.78709
WBGene00009453	-1.78552
WBGene00021645	-1.78143
WBGene00013249	-1.77994
WBGene00008351	-1.77971
WBGene00022067	-1.77942
WBGene00044995	-1.77937
WBGene00011267	-1.77697
WBGene00023094	-1.77563
WBGene00016678	-1.77546
WBGene00021702	-1.77347
WBGene00011398	-1.77267
WBGene00007846	-1.77194
WBGene00004130	-1.77161
WBGene00001244	-1.76991
WBGene00000393	-1.76914
WBGene00015569	-1.76851
WBGene00020407	-1.76785
WBGene00023013	-1.7667
WBGene00200608	-1.76389
WBGene00021605	-1.7605
WBGene00199108	-1.75851
WBGene00013944	-1.75603
WBGene00011591	-1.7533
WBGene00023123	-1.75324
WBGene00021345	-1.75288
WBGene00014105	-1.75271
WBGene00003252	-1.75215
WBGene00013942	-1.74958
WBGene00013574	-1.74866
WBGene00201931	-1.74575
WBGene00044218	-1.74453
WBGene00012922	-1.74286
WBGene00022999	-1.74093
WBGene00194836	-1.74075
WBGene00021483	-1.73842
WBGene00010402	-1.73791
WBGene00017152	-1.73696
WBGene00000734	-1.73397
WBGene00022897	-1.73358
WBGene00021653	-1.73169
WBGene00023175	-1.73166
WBGene00023173	-1.73133
WBGene00023202	-1.73105
WBGene00269378	-1.72881
WBGene00021269	-1.7287
WBGene00014339	-1.72586
WBGene00023152	-1.72442
WBGene00008121	-1.7229
WBGene00014182	-1.72286
WBGene00010811	-1.72085
WBGene00220011	-1.71865
WBGene00010003	-1.71858
WBGene00023351	-1.71807
WBGene00011721	-1.71752
WBGene00023003	-1.71525
WBGene00198447	-1.71507
WBGene00197474	-1.71176
WBGene00023035	-1.71116
WBGene00045238	-1.71006
WBGene00023498	-1.70855
WBGene00023451	-1.70709
WBGene00206380	-1.70593
WBGene00199916	-1.70563
WBGene00195864	-1.70468
WBGene00017188	-1.70402
WBGene00006985	-1.70205
WBGene00044923	-1.69946
WBGene00004056	-1.69752
WBGene00016076	-1.69569
WBGene00219932	-1.69472
WBGene00199612	-1.69354
WBGene00022899	-1.69195
WBGene00198805	-1.69081
WBGene00044606	-1.68952
WBGene00269383	-1.68813
WBGene00020212	-1.68615
WBGene00007331	-1.68415
WBGene00196359	-1.68382
WBGene00023139	-1.68376
WBGene00197602	-1.68351
WBGene00022607	-1.68313
WBGene00199569	-1.68193
WBGene00014320	-1.68044
WBGene00023006	-1.67889
WBGene00200583	-1.67874
WBGene00014340	-1.67829
WBGene00014610	-1.67795
WBGene00022987	-1.67744
WBGene00219912	-1.6761
WBGene00014533	-1.67575
WBGene00014546	-1.6753
WBGene00014609	-1.67277
WBGene00044499	-1.67241
WBGene00014082	-1.67222
WBGene00014188	-1.67116
WBGene00197243	-1.67009
WBGene00014568	-1.6667
WBGene00201595	-1.66611
WBGene00012755	-1.66519
WBGene00014525	-1.66404
WBGene00013755	-1.66356
WBGene00018803	-1.66269
WBGene00196798	-1.66241
WBGene00011346	-1.66097
WBGene00023174	-1.65982
WBGene00023207	-1.65926
WBGene00015504	-1.65532
WBGene00044926	-1.65459
WBGene00018807	-1.65338
WBGene00000310	-1.65184
WBGene00022992	-1.65135
WBGene00196863	-1.65096
WBGene00194993	-1.65042
WBGene00219609	-1.64994
WBGene00004352	-1.64737
WBGene00014385	-1.64495
WBGene00195142	-1.64433
WBGene00006315	-1.64183
WBGene00014608	-1.63721
WBGene00019517	-1.63603
WBGene00012124	-1.63554
WBGene00011757	-1.6337
WBGene00018394	-1.63208
WBGene00013999	-1.6304
WBGene00009846	-1.62931
WBGene00023179	-1.62774
WBGene00015647	-1.62737
WBGene00022952	-1.62645
WBGene00011498	-1.62593
WBGene00022026	-1.62567
WBGene00023063	-1.6187
WBGene00012792	-1.61762
WBGene00200811	-1.61731
WBGene00197945	-1.61666
WBGene00008384	-1.61647
WBGene00020952	-1.61562
WBGene00011497	-1.61485
WBGene00006843	-1.61338
WBGene00197378	-1.61184
WBGene00001145	-1.60823
WBGene00008949	-1.60779
WBGene00014297	-1.60679
WBGene00013244	-1.60595
WBGene00013440	-1.60336
WBGene00022953	-1.60055
WBGene00014476	-1.59942
WBGene00010619	-1.59903
WBGene00219687	-1.59768
WBGene00022205	-1.59608
WBGene00005222	-1.5906
WBGene00002071	-1.58959
WBGene00020527	-1.58454
WBGene00006753	-1.5843
WBGene00022916	-1.58413
WBGene00009572	-1.5835
WBGene00014672	-1.58323
WBGene00014027	-1.58262
WBGene00198763	-1.57939
WBGene00195071	-1.5774
WBGene00023399	-1.57162
WBGene00045203	-1.57104
WBGene00023128	-1.56777
WBGene00014321	-1.56758
WBGene00021464	-1.56593
WBGene00200252	-1.56398
WBGene00006384	-1.5597
WBGene00018773	-1.55832
WBGene00016637	-1.55686
WBGene00020912	-1.5549
WBGene00235090	-1.55211
WBGene00003911	-1.55107
WBGene00015200	-1.55077
WBGene00023497	-1.5488
WBGene00019327	-1.54463
WBGene00021884	-1.54433
WBGene00009260	-1.54287
WBGene00018990	-1.54281
WBGene00045212	-1.54256
WBGene00022978	-1.54185
WBGene00017736	-1.54028
WBGene00000735	-1.54016
WBGene00018578	-1.54003
WBGene00003602	-1.53917
WBGene00021402	-1.53781
WBGene00021672	-1.53733
WBGene00016131	-1.537
WBGene00021487	-1.53465
WBGene00022349	-1.53452
WBGene00016075	-1.53398
WBGene00022961	-1.53191
WBGene00017423	-1.52848
WBGene00014325	-1.52754
WBGene00017751	-1.52586
WBGene00019302	-1.52575
WBGene00013321	-1.5197
WBGene00020457	-1.51778
WBGene00008863	-1.502
WBGene00022198	-1.50128
WBGene00022178	-1.50111
WBGene00001671	-1.50007
WBGene00014361	-1.4998
WBGene00001459	-1.49714
WBGene00235352	-1.49667
WBGene00022947	-1.4963
WBGene00021941	-1.49586
WBGene00013180	-1.49461
WBGene00004198	-1.49438
WBGene00019133	-1.49378
WBGene00001553	-1.49252
WBGene00007218	-1.48657
WBGene00013226	-1.48396
WBGene00044281	-1.48338
WBGene00009292	-1.4822
WBGene00044222	-1.48081
WBGene00020744	-1.48071
WBGene00045289	-1.48026
WBGene00195289	-1.4777
WBGene00023004	-1.47759
WBGene00023184	-1.4769
WBGene00019814	-1.47682
WBGene00020313	-1.47367
WBGene00044495	-1.47353
WBGene00007892	-1.47195
WBGene00235158	-1.46989
WBGene00044639	-1.46715
WBGene00235354	-1.46578
WBGene00022270	-1.46556
WBGene00009162	-1.46263
WBGene00021118	-1.45945
WBGene00194675	-1.45873
WBGene00044559	-1.45767
WBGene00021018	-1.45409
WBGene00013816	-1.45174
WBGene00019858	-1.44853
WBGene00013612	-1.44379
WBGene00220238	-1.44298
WBGene00021542	-1.44223
WBGene00201199	-1.44199
WBGene00014517	-1.44137
WBGene00008932	-1.43941
WBGene00022688	-1.43901
WBGene00017391	-1.43698
WBGene00013153	-1.43633
WBGene00004057	-1.4362
WBGene00000294	-1.43415
WBGene00023491	-1.43363
WBGene00021700	-1.43296
WBGene00022963	-1.43101
WBGene00021246	-1.42364
WBGene00194998	-1.42343
WBGene00008270	-1.42174
WBGene00014371	-1.41787
WBGene00012898	-1.41785
WBGene00019200	-1.41499
WBGene00019381	-1.41378
WBGene00012851	-1.4114
WBGene00017942	-1.40705
WBGene00006769	-1.40289
WBGene00016072	-1.4017
WBGene00016061	-1.4004
WBGene00006923	-1.3997
WBGene00021607	-1.39483
WBGene00021237	-1.3897
WBGene00219725	-1.38865
WBGene00023204	-1.38824
WBGene00022726	-1.3873
WBGene00016489	-1.38481
WBGene00002222	-1.38326
WBGene00010028	-1.3801
WBGene00021635	-1.37993
WBGene00012103	-1.37816
WBGene00017160	-1.37376
WBGene00012222	-1.37217
WBGene00015015	-1.37207
WBGene00000308	-1.37207
WBGene00023172	-1.37128
WBGene00003970	-1.36747
WBGene00014852	-1.36731
WBGene00019872	-1.36479
WBGene00201350	-1.36333
WBGene00016112	-1.35658
WBGene00003075	-1.35594
WBGene00008090	-1.35591
WBGene00022413	-1.35333
WBGene00012201	-1.35317
WBGene00013269	-1.3454
WBGene00017556	-1.34422
WBGene00004855	-1.34296
WBGene00009233	-1.34159
WBGene00019360	-1.33976
WBGene00015012	-1.33617
WBGene00005223	-1.33331
WBGene00022689	-1.32678
WBGene00004849	-1.32552
WBGene00050946	-1.32452
WBGene00197130	-1.3233
WBGene00014402	-1.32293
WBGene00018688	-1.32109
WBGene00014373	-1.31684
WBGene00012618	-1.31644
WBGene00044200	-1.31519
WBGene00008975	-1.31207
WBGene00013134	-1.31098
WBGene00014295	-1.30759
WBGene00077552	-1.30685
WBGene00013165	-1.30286
WBGene00009962	-1.2989
WBGene00021417	-1.29542
WBGene00014505	-1.2932
WBGene00021968	-1.29077
WBGene00019491	-1.29052
WBGene00009641	-1.28872
WBGene00010453	-1.28793
WBGene00010734	-1.28651
WBGene00012952	-1.286
WBGene00013603	-1.28427
WBGene00022508	-1.28317
WBGene00011131	-1.28312
WBGene00022175	-1.2826
WBGene00007133	-1.27462
WBGene00011433	-1.27212
WBGene00011564	-1.27041
WBGene00014914	-1.26881
WBGene00023203	-1.26678
WBGene00011303	-1.26458
WBGene00016635	-1.26436
WBGene00018390	-1.2638
WBGene00045077	-1.26276
WBGene00022544	-1.26264
WBGene00000221	-1.26086
WBGene00018648	-1.26051
WBGene00019174	-1.25912
WBGene00002218	-1.25641
WBGene00017344	-1.2551
WBGene00009602	-1.25234
WBGene00003414	-1.24739
WBGene00017507	-1.24467
WBGene00013195	-1.24421
WBGene00022177	-1.2346
WBGene00012569	-1.23375
WBGene00249812	-1.22973
WBGene00050900	-1.22932
WBGene00020100	-1.22923
WBGene00018304	-1.22474
WBGene00201019	-1.22422
WBGene00005961	-1.22397
WBGene00000788	-1.22365
WBGene00010712	-1.22055
WBGene00017182	-1.22018
WBGene00003655	-1.21935
WBGene00021000	-1.21721
WBGene00001042	-1.21596
WBGene00012151	-1.21362
WBGene00009812	-1.21181
WBGene00022308	-1.20843
WBGene00023246	-1.20803
WBGene00045297	-1.20463
WBGene00001189	-1.2044
WBGene00010897	-1.20369
WBGene00194981	-1.20295
WBGene00013228	-1.20071
WBGene00023007	-1.19898
WBGene00009009	-1.1978
WBGene00009148	-1.19688
WBGene00012624	-1.19609
WBGene00014663	-1.19508
WBGene00017890	-1.19385
WBGene00020852	-1.19321
WBGene00007923	-1.19312
WBGene00001736	-1.19133
WBGene00022063	-1.191
WBGene00010431	-1.19079
WBGene00022972	-1.1898
WBGene00021013	-1.18708
WBGene00206415	-1.18445
WBGene00050920	-1.18231
WBGene00197843	-1.17736
WBGene00044233	-1.17601
WBGene00014987	-1.16794
WBGene00017571	-1.16685
WBGene00010433	-1.16404
WBGene00019638	-1.16141
WBGene00004089	-1.16077
WBGene00010407	-1.1572
WBGene00008545	-1.15697
WBGene00020345	-1.15607
WBGene00021387	-1.15535
WBGene00016172	-1.15461
WBGene00016931	-1.15115
WBGene00002264	-1.15074
WBGene00006750	-1.15044
WBGene00015158	-1.1473
WBGene00004313	-1.14701
WBGene00001008	-1.14673
WBGene00014338	-1.14475
WBGene00001941	-1.14059
WBGene00200434	-1.13956
WBGene00195169	-1.13548
WBGene00001433	-1.13489
WBGene00195254	-1.13347
WBGene00194812	-1.13195
WBGene00013508	-1.13076
WBGene00023156	-1.13042
WBGene00019816	-1.12902
WBGene00022290	-1.12854
WBGene00001994	-1.127
WBGene00016485	-1.12604
WBGene00010451	-1.12583
WBGene00021027	-1.12533
WBGene00019082	-1.125
WBGene00044401	-1.12486
WBGene00023017	-1.12087
WBGene00201427	-1.11608
WBGene00017949	-1.11247
WBGene00013666	-1.10994
WBGene00019237	-1.10918
WBGene00020004	-1.1086
WBGene00219295	-1.10346
WBGene00022512	-1.10291
WBGene00001188	-1.10146
WBGene00013348	-1.09787
WBGene00009801	-1.09728
WBGene00009509	-1.09425
WBGene00006967	-1.09412
WBGene00013409	-1.08976
WBGene00009988	-1.08965
WBGene00021198	-1.08947
WBGene00000112	-1.08938
WBGene00019955	-1.08923
WBGene00269384	-1.08802
WBGene00020564	-1.088
WBGene00185118	-1.08755
WBGene00249826	-1.08476
WBGene00011663	-1.0818
WBGene00077762	-1.07885
WBGene00020090	-1.07873
WBGene00007114	-1.07733
WBGene00022834	-1.07712
WBGene00044462	-1.07703
WBGene00015639	-1.07682
WBGene00007099	-1.07562
WBGene00018617	-1.07519
WBGene00013236	-1.07433
WBGene00012412	-1.07388
WBGene00014166	-1.07326
WBGene00010584	-1.07026
WBGene00045123	-1.06917
WBGene00019303	-1.0675
WBGene00014907	-1.06736
WBGene00021461	-1.06644
WBGene00000730	-1.06574
WBGene00219661	-1.0638
WBGene00003153	-1.06294
WBGene00021372	-1.0626
WBGene00002990	-1.06087
WBGene00014630	-1.05803
WBGene00185098	-1.05786
WBGene00012499	-1.05689
WBGene00000728	-1.05682
WBGene00007485	-1.05211
WBGene00001025	-1.05179
WBGene00008205	-1.05042
WBGene00019735	-1.04729
WBGene00010507	-1.04691
WBGene00013289	-1.04576
WBGene00007702	-1.0411
WBGene00008086	-1.04
WBGene00014178	-1.03985
WBGene00010783	-1.03946
WBGene00007124	-1.0378
WBGene00022942	-1.03555
WBGene00019250	-1.03416
WBGene00014386	-1.03365
WBGene00021415	-1.03331
WBGene00014585	-1.03076
WBGene00009544	-1.03044
WBGene00045091	-1.02784
WBGene00194708	-1.02517
WBGene00012498	-1.02408
WBGene00013632	-1.02342
WBGene00189979	-1.02117
WBGene00013248	-1.02087
WBGene00019713	-1.02067
WBGene00018223	-1.01985
WBGene00022730	-1.01909
WBGene00023181	-1.01896
WBGene00018238	-1.01757
WBGene00013984	-1.01698
WBGene00007924	-1.01659
WBGene00012908	-1.01556
WBGene00022543	-1.01521
WBGene00016561	-1.0151
WBGene00235163	-1.01377
WBGene00021863	-1.01326
WBGene00044478	-1.0095
WBGene00018667	-1.00926
WBGene00195025	-1.00516

## Sheet: simr-1 25C gen1 up
Supplementary File 3, Sheet 5: Small RNAs significantly up-regulated 2 fold or greater in simr-1 mutant animals at 25ºC for one generation.
Gene name	log2FoldChange
WBGene00021986	6.46362
WBGene00001935	5.27537
WBGene00003385	5.24785
WBGene00012867	4.92444
WBGene00013587	4.84751
WBGene00017061	4.62229
WBGene00001893	4.59382
WBGene00017153	4.56209
WBGene00200004	4.47173
WBGene00001890	4.38041
WBGene00001899	4.35197
WBGene00001791	4.31108
WBGene00001906	4.305
WBGene00001925	4.29551
WBGene00001881	4.29275
WBGene00001895	4.28976
WBGene00001927	4.28848
WBGene00012673	4.25933
WBGene00022815	4.24091
WBGene00199162	4.18313
WBGene00006508	4.17403
WBGene00001916	4.13453
WBGene00002048	4.08276
WBGene00021020	4.04362
WBGene00001883	3.96006
WBGene00001887	3.94946
WBGene00001907	3.90338
WBGene00010768	3.80562
WBGene00001886	3.80402
WBGene00017101	3.78704
WBGene00001904	3.6803
WBGene00001917	3.59997
WBGene00019096	3.55425
WBGene00001888	3.51968
WBGene00019997	3.49332
WBGene00017818	3.44605
WBGene00019094	3.43958
WBGene00001900	3.38767
WBGene00001884	3.36056
WBGene00021340	3.31874
WBGene00016763	3.23026
WBGene00000232	3.22336
WBGene00003533	3.20708
WBGene00001877	3.14012
WBGene00194682	3.10733
WBGene00018842	3.09047
WBGene00001931	3.02673
WBGene00001921	2.99506
WBGene00001942	2.93662
WBGene00012237	2.92897
WBGene00012148	2.90788
WBGene00014259	2.90393
WBGene00020183	2.89991
WBGene00016492	2.8697
WBGene00018330	2.8688
WBGene00011805	2.86665
WBGene00001939	2.82182
WBGene00015477	2.78956
WBGene00010295	2.76752
WBGene00018720	2.74112
WBGene00007752	2.60587
WBGene00017712	2.54302
WBGene00008779	2.53147
WBGene00001119	2.52545
WBGene00006819	2.47674
WBGene00019588	2.41682
WBGene00004357	2.39805
WBGene00013358	2.39584
WBGene00004747	2.36942
WBGene00000106	2.35825
WBGene00012423	2.35121
WBGene00014117	2.34348
WBGene00013419	2.30288
WBGene00016540	2.28864
WBGene00044061	2.26961
WBGene00001831	2.26579
WBGene00006771	2.26083
WBGene00021808	2.26001
WBGene00007281	2.25548
WBGene00004408	2.18688
WBGene00006840	2.17893
WBGene00004467	2.17065
WBGene00000057	2.15037
WBGene00021682	2.14527
WBGene00018491	2.14301
WBGene00044809	2.13791
WBGene00018446	2.13055
WBGene00012104	2.10125
WBGene00189969	2.08672
WBGene00013383	2.08628
WBGene00020770	2.07314
WBGene00008506	2.06398
WBGene00006536	2.05588
WBGene00006817	2.04588
WBGene00006619	2.03077
WBGene00002229	2.02895
WBGene00016953	2.02808
WBGene00003214	2.02751
WBGene00003230	2.01884
WBGene00003040	2.01746
WBGene00010493	2.01586
WBGene00007199	2.01333
WBGene00002219	2.01267
WBGene00000275	2.01035
WBGene00017210	2.00506
WBGene00001977	1.98737
WBGene00017177	1.98508
WBGene00016987	1.98408
WBGene00015312	1.98339
WBGene00004459	1.9825
WBGene00013156	1.9805
WBGene00021047	1.97421
WBGene00010294	1.97355
WBGene00014576	1.97283
WBGene00010844	1.97099
WBGene00003228	1.96885
WBGene00019890	1.96752
WBGene00009113	1.9667
WBGene00017796	1.96577
WBGene00020035	1.96484
WBGene00015488	1.96336
WBGene00011812	1.96133
WBGene00015205	1.95782
WBGene00002221	1.95133
WBGene00000197	1.95017
WBGene00010476	1.94651
WBGene00015912	1.9426
WBGene00004409	1.9386
WBGene00016995	1.93838
WBGene00020652	1.93539
WBGene00020290	1.93386
WBGene00002228	1.93134
WBGene00015344	1.93128
WBGene00000237	1.92975
WBGene00012928	1.92971
WBGene00007332	1.92525
WBGene00022257	1.91918
WBGene00017482	1.91664
WBGene00002047	1.91421
WBGene00020588	1.91268
WBGene00008968	1.91202
WBGene00005022	1.91097
WBGene00004952	1.90318
WBGene00003218	1.90289
WBGene00001470	1.9011
WBGene00013445	1.90078
WBGene00007225	1.89848
WBGene00022127	1.89817
WBGene00013106	1.89614
WBGene00003183	1.89596
WBGene00000122	1.89515
WBGene00001689	1.8927
WBGene00006777	1.8925
WBGene00012978	1.89102
WBGene00001937	1.89009
WBGene00000530	1.8866
WBGene00009035	1.88433
WBGene00013345	1.87552
WBGene00001683	1.87515
WBGene00010037	1.87299
WBGene00019157	1.87241
WBGene00001225	1.87156
WBGene00001832	1.86846
WBGene00019766	1.86689
WBGene00016824	1.86616
WBGene00003825	1.86615
WBGene00007150	1.86571
WBGene00007624	1.86463
WBGene00013217	1.85856
WBGene00010785	1.85679
WBGene00018325	1.85647
WBGene00014955	1.85593
WBGene00022167	1.85495
WBGene00001688	1.85438
WBGene00001855	1.85213
WBGene00011884	1.85156
WBGene00001829	1.85032
WBGene00020392	1.84731
WBGene00017298	1.84585
WBGene00014667	1.84304
WBGene00001919	1.84174
WBGene00020297	1.84161
WBGene00004179	1.83933
WBGene00011012	1.83746
WBGene00010353	1.83544
WBGene00001647	1.83437
WBGene00004392	1.82478
WBGene00012351	1.82241
WBGene00022378	1.82134
WBGene00004458	1.82128
WBGene00002226	1.81871
WBGene00004465	1.81768
WBGene00006496	1.81708
WBGene00008035	1.81652
WBGene00001005	1.81377
WBGene00019606	1.81151
WBGene00003410	1.81125
WBGene00004239	1.81111
WBGene00012551	1.80864
WBGene00006537	1.8083
WBGene00010627	1.80827
WBGene00015083	1.80818
WBGene00006796	1.80784
WBGene00003026	1.80591
WBGene00011562	1.80504
WBGene00235276	1.80416
WBGene00012897	1.80138
WBGene00011320	1.80095
WBGene00004945	1.80087
WBGene00200318	1.79885
WBGene00007287	1.79856
WBGene00000962	1.79699
WBGene00013380	1.79668
WBGene00004421	1.79443
WBGene00000804	1.79212
WBGene00006381	1.79036
WBGene00022681	1.78898
WBGene00001601	1.78724
WBGene00008005	1.78703
WBGene00003914	1.78319
WBGene00004737	1.7819
WBGene00019153	1.78098
WBGene00019008	1.77828
WBGene00001686	1.77744
WBGene00000995	1.77612
WBGene00003821	1.77343
WBGene00043948	1.77085
WBGene00008848	1.76992
WBGene00006993	1.76571
WBGene00008934	1.76511
WBGene00008789	1.76423
WBGene00021733	1.76312
WBGene00013209	1.76276
WBGene00020348	1.76276
WBGene00021035	1.76117
WBGene00002225	1.75949
WBGene00021604	1.75873
WBGene00021560	1.7574
WBGene00010492	1.7572
WBGene00002994	1.75583
WBGene00015133	1.75385
WBGene00021815	1.75162
WBGene00010293	1.75061
WBGene00010621	1.75028
WBGene00017843	1.74905
WBGene00021698	1.74753
WBGene00004208	1.7469
WBGene00004167	1.74609
WBGene00003947	1.74604
WBGene00011608	1.74547
WBGene00020030	1.74402
WBGene00004504	1.74325
WBGene00001080	1.73862
WBGene00002368	1.73859
WBGene00021868	1.73513
WBGene00020763	1.73462
WBGene00004042	1.73436
WBGene00004242	1.73343
WBGene00016163	1.73325
WBGene00021107	1.73285
WBGene00012156	1.73081
WBGene00004728	1.72979
WBGene00008210	1.72867
WBGene00021549	1.72797
WBGene00000405	1.7275
WBGene00012896	1.72149
WBGene00015297	1.71912
WBGene00017273	1.71906
WBGene00006565	1.71825
WBGene00013983	1.71785
WBGene00010583	1.7172
WBGene00014005	1.71635
WBGene00007617	1.71586
WBGene00004246	1.71094
WBGene00022722	1.70848
WBGene00002637	1.70835
WBGene00012903	1.70743
WBGene00020184	1.70416
WBGene00002196	1.69822
WBGene00007966	1.698
WBGene00013343	1.69762
WBGene00007445	1.69754
WBGene00000889	1.69711
WBGene00022394	1.69698
WBGene00015658	1.69697
WBGene00000798	1.69642
WBGene00004502	1.69605
WBGene00016178	1.69594
WBGene00013529	1.69548
WBGene00003160	1.69427
WBGene00019711	1.68869
WBGene00011634	1.68793
WBGene00008710	1.68498
WBGene00016073	1.68233
WBGene00011063	1.68191
WBGene00002036	1.68177
WBGene00007012	1.6808
WBGene00021763	1.68002
WBGene00001509	1.67969
WBGene00022738	1.67942
WBGene00007784	1.67891
WBGene00013150	1.67879
WBGene00012558	1.67791
WBGene00017186	1.67718
WBGene00016014	1.67629
WBGene00000868	1.67521
WBGene00002025	1.67486
WBGene00020915	1.6743
WBGene00000293	1.67362
WBGene00012643	1.67339
WBGene00003224	1.67337
WBGene00011464	1.67206
WBGene00021783	1.67197
WBGene00006528	1.67174
WBGene00001423	1.67168
WBGene00017928	1.67117
WBGene00018586	1.67081
WBGene00015677	1.67021
WBGene00011291	1.66989
WBGene00004209	1.669
WBGene00011944	1.66873
WBGene00018239	1.66744
WBGene00004027	1.66711
WBGene00009370	1.66595
WBGene00021074	1.66302
WBGene00003134	1.66055
WBGene00010579	1.65991
WBGene00001929	1.65786
WBGene00021056	1.65768
WBGene00017031	1.65689
WBGene00003235	1.65654
WBGene00001431	1.65564
WBGene00022042	1.65536
WBGene00003834	1.65533
WBGene00008151	1.65395
WBGene00016907	1.65395
WBGene00013447	1.65357
WBGene00013231	1.65281
WBGene00008503	1.65276
WBGene00011155	1.65226
WBGene00004503	1.65212
WBGene00017916	1.65197
WBGene00017733	1.65162
WBGene00017641	1.65085
WBGene00008688	1.64904
WBGene00012110	1.64803
WBGene00006994	1.6472
WBGene00008457	1.64584
WBGene00220117	1.64578
WBGene00044321	1.64547
WBGene00010036	1.64543
WBGene00018934	1.64463
WBGene00013737	1.64432
WBGene00018802	1.6443
WBGene00017301	1.64396
WBGene00001110	1.64361
WBGene00013200	1.64327
WBGene00020091	1.64017
WBGene00003395	1.63834
WBGene00010478	1.63678
WBGene00014208	1.63639
WBGene00021470	1.63613
WBGene00000519	1.63543
WBGene00000474	1.63531
WBGene00001092	1.63418
WBGene00015525	1.63324
WBGene00022373	1.63186
WBGene00001973	1.63182
WBGene00011501	1.63015
WBGene00015025	1.62997
WBGene00009993	1.62938
WBGene00013766	1.6292
WBGene00011043	1.62912
WBGene00004468	1.62777
WBGene00013688	1.62729
WBGene00012715	1.62716
WBGene00044894	1.62671
WBGene00021073	1.62651
WBGene00001565	1.62559
WBGene00001979	1.62548
WBGene00013324	1.62504
WBGene00001748	1.62432
WBGene00012484	1.62388
WBGene00013210	1.62371
WBGene00021638	1.62347
WBGene00021809	1.62227
WBGene00019402	1.62201
WBGene00013652	1.62174
WBGene00007009	1.62143
WBGene00018781	1.62118
WBGene00021097	1.62087
WBGene00019510	1.62033
WBGene00015817	1.61969
WBGene00013270	1.61939
WBGene00022831	1.61871
WBGene00001031	1.61604
WBGene00021595	1.61581
WBGene00004241	1.61581
WBGene00000499	1.6155
WBGene00013167	1.61549
WBGene00012995	1.61523
WBGene00012645	1.61424
WBGene00019118	1.61357
WBGene00004043	1.61304
WBGene00004980	1.6125
WBGene00011867	1.61221
WBGene00006734	1.61213
WBGene00001999	1.61202
WBGene00013728	1.61186
WBGene00001862	1.61169
WBGene00012936	1.61104
WBGene00015515	1.61055
WBGene00011986	1.60929
WBGene00021784	1.60926
WBGene00007101	1.60849
WBGene00011350	1.60829
WBGene00006473	1.60746
WBGene00006529	1.60728
WBGene00018426	1.60711
WBGene00003063	1.60627
WBGene00022286	1.60576
WBGene00011054	1.60547
WBGene00022399	1.60496
WBGene00022269	1.60325
WBGene00012692	1.60315
WBGene00019994	1.60273
WBGene00003144	1.60234
WBGene00011061	1.60171
WBGene00001102	1.60123
WBGene00000079	1.60109
WBGene00019883	1.60039
WBGene00004953	1.60019
WBGene00008857	1.59965
WBGene00001227	1.5993
WBGene00021676	1.5989
WBGene00010787	1.59881
WBGene00016303	1.59876
WBGene00006727	1.59849
WBGene00019838	1.59778
WBGene00021749	1.59752
WBGene00000865	1.59743
WBGene00003951	1.59732
WBGene00021912	1.59715
WBGene00017075	1.59713
WBGene00004466	1.59691
WBGene00044008	1.59667
WBGene00021697	1.59652
WBGene00022347	1.5953
WBGene00012879	1.59401
WBGene00007651	1.593
WBGene00018154	1.59277
WBGene00003596	1.5921
WBGene00002231	1.59192
WBGene00008107	1.59177
WBGene00022021	1.59134
WBGene00020284	1.5908
WBGene00007637	1.58974
WBGene00007602	1.58972
WBGene00000763	1.58959
WBGene00022037	1.58951
WBGene00003801	1.58889
WBGene00003220	1.58879
WBGene00001830	1.58676
WBGene00012767	1.58674
WBGene00013580	1.58643
WBGene00011734	1.58587
WBGene00001568	1.58511
WBGene00007555	1.58467
WBGene00002985	1.5842
WBGene00007050	1.58347
WBGene00003826	1.58212
WBGene00012652	1.58087
WBGene00010990	1.58072
WBGene00004419	1.58065
WBGene00022970	1.58042
WBGene00022048	1.58041
WBGene00004075	1.58035
WBGene00010051	1.58007
WBGene00018991	1.57799
WBGene00004955	1.5779
WBGene00017166	1.57775
WBGene00001971	1.57761
WBGene00022043	1.57738
WBGene00016509	1.57736
WBGene00021686	1.57734
WBGene00000549	1.57678
WBGene00000410	1.57636
WBGene00015296	1.57568
WBGene00006503	1.57522
WBGene00002153	1.57436
WBGene00018305	1.57329
WBGene00021088	1.57254
WBGene00012395	1.57204
WBGene00018900	1.57148
WBGene00002344	1.57049
WBGene00004374	1.56916
WBGene00009176	1.5685
WBGene00003475	1.56822
WBGene00003787	1.56718
WBGene00004471	1.56689
WBGene00019247	1.56499
WBGene00004338	1.56449
WBGene00018302	1.56439
WBGene00019940	1.56373
WBGene00019600	1.5637
WBGene00003216	1.56235
WBGene00009966	1.56235
WBGene00018327	1.56231
WBGene00021667	1.56121
WBGene00004417	1.56118
WBGene00017988	1.56038
WBGene00003133	1.56034
WBGene00012697	1.56006
WBGene00020742	1.55974
WBGene00015565	1.55964
WBGene00011011	1.55928
WBGene00019608	1.55761
WBGene00001793	1.55667
WBGene00003928	1.5566
WBGene00000465	1.55587
WBGene00016277	1.55383
WBGene00018721	1.55345
WBGene00003795	1.55326
WBGene00004078	1.55274
WBGene00004699	1.55236
WBGene00000224	1.55228
WBGene00004243	1.55191
WBGene00000257	1.55147
WBGene00021945	1.55061
WBGene00004031	1.54963
WBGene00000933	1.5494
WBGene00021377	1.54899
WBGene00009086	1.54889
WBGene00013168	1.54888
WBGene00013354	1.54857
WBGene00006997	1.54724
WBGene00013038	1.54694
WBGene00000498	1.54684
WBGene00003955	1.54675
WBGene00022078	1.5464
WBGene00011408	1.54554
WBGene00018482	1.54521
WBGene00011391	1.54455
WBGene00000840	1.54377
WBGene00002045	1.54328
WBGene00003231	1.54283
WBGene00044063	1.54256
WBGene00022586	1.5425
WBGene00009186	1.54194
WBGene00012769	1.54191
WBGene00001085	1.53948
WBGene00003158	1.53888
WBGene00010056	1.53876
WBGene00020796	1.53856
WBGene00011560	1.53845
WBGene00016323	1.53809
WBGene00009219	1.53805
WBGene00012984	1.53755
WBGene00004277	1.53616
WBGene00013443	1.53551
WBGene00016415	1.53456
WBGene00019334	1.53429
WBGene00010409	1.5328
WBGene00018294	1.53275
WBGene00003676	1.53274
WBGene00004806	1.53251
WBGene00017589	1.5316
WBGene00021512	1.5314
WBGene00004874	1.53081
WBGene00002066	1.53057
WBGene00012276	1.53043
WBGene00003083	1.53039
WBGene00044958	1.53033
WBGene00004132	1.53019
WBGene00019628	1.52912
WBGene00007278	1.52901
WBGene00001028	1.52896
WBGene00008887	1.52852
WBGene00001946	1.5279
WBGene00014066	1.52723
WBGene00015143	1.52717
WBGene00013143	1.52682
WBGene00017920	1.52574
WBGene00006571	1.5249
WBGene00015095	1.52487
WBGene00008385	1.52485
WBGene00019241	1.52385
WBGene00015698	1.52385
WBGene00016836	1.52366
WBGene00012676	1.52299
WBGene00022719	1.52286
WBGene00002214	1.52257
WBGene00013729	1.52195
WBGene00019259	1.52128
WBGene00004217	1.52109
WBGene00004143	1.52104
WBGene00006730	1.52099
WBGene00006489	1.52022
WBGene00018099	1.52018
WBGene00008877	1.5196
WBGene00000874	1.51948
WBGene00000867	1.51931
WBGene00017352	1.51897
WBGene00009220	1.51845
WBGene00006414	1.51845
WBGene00008825	1.51834
WBGene00013682	1.51822
WBGene00018806	1.51816
WBGene00006613	1.51816
WBGene00012319	1.51766
WBGene00015283	1.51765
WBGene00010500	1.5176
WBGene00011731	1.51746
WBGene00019983	1.51708
WBGene00022381	1.51704
WBGene00017037	1.51623
WBGene00020696	1.51542
WBGene00017313	1.51535
WBGene00015557	1.51533
WBGene00002850	1.51519
WBGene00004851	1.51452
WBGene00000913	1.51444
WBGene00000201	1.51403
WBGene00013558	1.51355
WBGene00001230	1.51323
WBGene00001018	1.51299
WBGene00006440	1.51176
WBGene00019246	1.51083
WBGene00021538	1.51013
WBGene00010847	1.50993
WBGene00012758	1.50983
WBGene00011509	1.50981
WBGene00016508	1.50965
WBGene00009646	1.50939
WBGene00017749	1.50939
WBGene00003785	1.50929
WBGene00001224	1.50918
WBGene00184990	1.50915
WBGene00020025	1.50913
WBGene00003132	1.509
WBGene00013724	1.50846
WBGene00018975	1.50835
WBGene00012943	1.50831
WBGene00017319	1.50766
WBGene00022667	1.50759
WBGene00015941	1.50732
WBGene00007352	1.50693
WBGene00011662	1.50624
WBGene00008266	1.50613
WBGene00194891	1.50543
WBGene00004326	1.50521
WBGene00021644	1.50493
WBGene00018270	1.50487
WBGene00017435	1.50475
WBGene00013123	1.50385
WBGene00000143	1.50358
WBGene00001599	1.50354
WBGene00000064	1.50332
WBGene00022051	1.50289
WBGene00008117	1.50195
WBGene00021811	1.50074
WBGene00001513	1.50059
WBGene00016981	1.50054
WBGene00015232	1.50018
WBGene00001058	1.50014
WBGene00077732	1.49958
WBGene00004185	1.49885
WBGene00012665	1.49866
WBGene00017951	1.49858
WBGene00019013	1.49858
WBGene00003367	1.49812
WBGene00021192	1.49809
WBGene00004704	1.49756
WBGene00003992	1.49719
WBGene00007786	1.49689
WBGene00000093	1.4967
WBGene00011282	1.49634
WBGene00015811	1.49634
WBGene00022173	1.49591
WBGene00013095	1.49549
WBGene00000123	1.49526
WBGene00014019	1.49521
WBGene00001209	1.49463
WBGene00003796	1.49409
WBGene00013531	1.49391
WBGene00021905	1.49376
WBGene00016142	1.4936
WBGene00019168	1.49355
WBGene00003159	1.49317
WBGene00010061	1.49306
WBGene00000479	1.49303
WBGene00009542	1.49302
WBGene00010609	1.49278
WBGene00019823	1.49275
WBGene00007413	1.49266
WBGene00013094	1.49257
WBGene00015478	1.49208
WBGene00044789	1.4919
WBGene00000473	1.49165
WBGene00022737	1.49147
WBGene00007348	1.49123
WBGene00010638	1.49113
WBGene00023390	1.49107
WBGene00008664	1.4902
WBGene00003036	1.48954
WBGene00003799	1.48919
WBGene00022368	1.48855
WBGene00004738	1.48853
WBGene00003085	1.48848
WBGene00010263	1.48821
WBGene00019822	1.48753
WBGene00013460	1.48696
WBGene00008397	1.48679
WBGene00000837	1.48653
WBGene00006405	1.4858
WBGene00014954	1.48555
WBGene00004279	1.48508
WBGene00001226	1.48468
WBGene00007008	1.48451
WBGene00007826	1.48395
WBGene00016317	1.48232
WBGene00001571	1.48191
WBGene00012543	1.48141
WBGene00015329	1.48087
WBGene00003797	1.48079
WBGene00009211	1.48072
WBGene00008166	1.48065
WBGene00000226	1.48034
WBGene00003927	1.48016
WBGene00255594	1.48012
WBGene00004703	1.48004
WBGene00001017	1.47997
WBGene00022148	1.47981
WBGene00013689	1.47915
WBGene00003155	1.4788
WBGene00016405	1.4785
WBGene00018890	1.47798
WBGene00010232	1.47797
WBGene00022119	1.4772
WBGene00016151	1.47711
WBGene00022301	1.47638
WBGene00017046	1.4751
WBGene00003829	1.47478
WBGene00018612	1.47433
WBGene00003186	1.47431
WBGene00009127	1.47379
WBGene00012150	1.47346
WBGene00007290	1.47343
WBGene00009944	1.47338
WBGene00012059	1.47335
WBGene00003390	1.47318
WBGene00007505	1.47313
WBGene00021906	1.47285
WBGene00016381	1.47218
WBGene00021444	1.47185
WBGene00017162	1.47184
WBGene00014165	1.47168
WBGene00020098	1.47156
WBGene00018118	1.46954
WBGene00010912	1.46927
WBGene00008933	1.4692
WBGene00006497	1.46888
WBGene00001497	1.4679
WBGene00021367	1.46776
WBGene00004706	1.46728
WBGene00007042	1.46681
WBGene00002068	1.46673
WBGene00007024	1.46583
WBGene00002000	1.46562
WBGene00002324	1.46538
WBGene00006647	1.46471
WBGene00010922	1.46443
WBGene00022851	1.46399
WBGene00008404	1.46385
WBGene00006446	1.46352
WBGene00011051	1.46338
WBGene00021061	1.46284
WBGene00000387	1.4614
WBGene00022739	1.45997
WBGene00003130	1.45929
WBGene00004101	1.45903
WBGene00017088	1.45881
WBGene00013506	1.45866
WBGene00003156	1.45653
WBGene00003865	1.45647
WBGene00001589	1.45617
WBGene00001093	1.45614
WBGene00011292	1.45592
WBGene00004077	1.45573
WBGene00012386	1.45509
WBGene00001997	1.4547
WBGene00012694	1.45445
WBGene00007048	1.45383
WBGene00022458	1.45307
WBGene00008729	1.45298
WBGene00003068	1.45281
WBGene00001032	1.45275
WBGene00013243	1.45222
WBGene00021004	1.45182
WBGene00009306	1.45156
WBGene00002034	1.45105
WBGene00001600	1.4504
WBGene00010140	1.44998
WBGene00006375	1.44991
WBGene00004126	1.44986
WBGene00018866	1.44965
WBGene00022742	1.44908
WBGene00012496	1.44893
WBGene00002191	1.44833
WBGene00021507	1.44772
WBGene00000369	1.44763
WBGene00008920	1.44741
WBGene00022774	1.44735
WBGene00006699	1.44726
WBGene00015102	1.44717
WBGene00019498	1.44706
WBGene00000392	1.4467
WBGene00012000	1.44663
WBGene00017769	1.44543
WBGene00002005	1.4452
WBGene00020172	1.44448
WBGene00009404	1.44446
WBGene00011270	1.44401
WBGene00022099	1.44394
WBGene00009289	1.44373
WBGene00019121	1.44368
WBGene00020695	1.4434
WBGene00012982	1.44335
WBGene00009922	1.44303
WBGene00016015	1.44282
WBGene00000276	1.44247
WBGene00012316	1.44231
WBGene00009460	1.44213
WBGene00013267	1.44185
WBGene00017643	1.44173
WBGene00015098	1.44137
WBGene00012097	1.4411
WBGene00018599	1.44052
WBGene00011559	1.4397
WBGene00001214	1.4395
WBGene00020464	1.43947
WBGene00007021	1.4389
WBGene00013405	1.43884
WBGene00013442	1.43854
WBGene00000115	1.43797
WBGene00003148	1.43701
WBGene00017999	1.43638
WBGene00000109	1.43582
WBGene00016173	1.43567
WBGene00022669	1.43561
WBGene00008143	1.43519
WBGene00004754	1.43498
WBGene00001037	1.43475
WBGene00018064	1.43473
WBGene00004093	1.43442
WBGene00011047	1.43428
WBGene00021555	1.4334
WBGene00009284	1.43337
WBGene00195093	1.43299
WBGene00022124	1.43276
WBGene00009203	1.43249
WBGene00007504	1.43235
WBGene00000502	1.43119
WBGene00005662	1.43029
WBGene00003901	1.43029
WBGene00012522	1.43011
WBGene00003421	1.42984
WBGene00009084	1.42979
WBGene00015021	1.42971
WBGene00022165	1.42923
WBGene00138717	1.4292
WBGene00022069	1.42813
WBGene00007576	1.42797
WBGene00018898	1.42748
WBGene00020097	1.42715
WBGene00007054	1.42685
WBGene00001029	1.42677
WBGene00001443	1.42597
WBGene00018762	1.42566
WBGene00002694	1.42561
WBGene00006829	1.42543
WBGene00006311	1.42486
WBGene00020102	1.42451
WBGene00011507	1.42448
WBGene00012999	1.42443
WBGene00009188	1.42435
WBGene00003477	1.42358
WBGene00022489	1.42347
WBGene00018921	1.42335
WBGene00009469	1.42271
WBGene00010450	1.42253
WBGene00012651	1.42221
WBGene00022059	1.422
WBGene00000876	1.42199
WBGene00022390	1.42137
WBGene00016002	1.42109
WBGene00004320	1.42106
WBGene00021810	1.42054
WBGene00020600	1.42053
WBGene00003241	1.42043
WBGene00007258	1.4204
WBGene00016200	1.42036
WBGene00017261	1.41979
WBGene00000836	1.41976
WBGene00010302	1.41956
WBGene00001281	1.41951
WBGene00017085	1.41933
WBGene00021270	1.4189
WBGene00003210	1.41871
WBGene00013677	1.41839
WBGene00020441	1.41779
WBGene00018678	1.4177
WBGene00007922	1.41764
WBGene00021888	1.4175
WBGene00013610	1.41724
WBGene00010260	1.41696
WBGene00000814	1.4167
WBGene00016811	1.41658
WBGene00021536	1.41614
WBGene00004416	1.41606
WBGene00004759	1.41601
WBGene00009112	1.41583
WBGene00010807	1.41569
WBGene00012244	1.41542
WBGene00022227	1.41494
WBGene00009368	1.41478
WBGene00000377	1.41474
WBGene00000381	1.41437
WBGene00022019	1.41416
WBGene00011913	1.41405
WBGene00003941	1.41392
WBGene00206375	1.41366
WBGene00007400	1.41352
WBGene00012360	1.4127
WBGene00012481	1.41236
WBGene00044077	1.41214
WBGene00015091	1.412
WBGene00011240	1.41168
WBGene00007709	1.41152
WBGene00000866	1.41078
WBGene00021012	1.41075
WBGene00008380	1.41062
WBGene00003073	1.41055
WBGene00021170	1.40978
WBGene00023191	1.4095
WBGene00016741	1.40927
WBGene00006700	1.40776
WBGene00003391	1.40738
WBGene00016236	1.40733
WBGene00018159	1.40684
WBGene00021466	1.40659
WBGene00020717	1.40601
WBGene00010663	1.40594
WBGene00043057	1.40571
WBGene00003805	1.40517
WBGene00004094	1.40504
WBGene00013260	1.40454
WBGene00017268	1.404
WBGene00015461	1.40326
WBGene00010882	1.40324
WBGene00003924	1.40324
WBGene00008399	1.40254
WBGene00000765	1.40219
WBGene00007564	1.4009
WBGene00003864	1.40078
WBGene00000817	1.40039
WBGene00010317	1.40016
WBGene00011481	1.40011
WBGene00010766	1.40009
WBGene00013144	1.40002
WBGene00014078	1.39975
WBGene00015130	1.39881
WBGene00018680	1.39846
WBGene00010758	1.3979
WBGene00020839	1.39787
WBGene00019076	1.39785
WBGene00007501	1.39778
WBGene00018950	1.39762
WBGene00007586	1.39748
WBGene00018362	1.39736
WBGene00000247	1.39735
WBGene00011017	1.39716
WBGene00003389	1.39716
WBGene00000382	1.39697
WBGene00006786	1.39662
WBGene00013006	1.39639
WBGene00022862	1.39612
WBGene00021857	1.39581
WBGene00004282	1.39575
WBGene00012471	1.39542
WBGene00003905	1.3953
WBGene00007620	1.39466
WBGene00008339	1.39461
WBGene00044704	1.39459
WBGene00011038	1.39447
WBGene00015347	1.39436
WBGene00012845	1.39385
WBGene00001330	1.39381
WBGene00045434	1.39274
WBGene00003504	1.39272
WBGene00021522	1.39222
WBGene00000155	1.3922
WBGene00012927	1.39189
WBGene00016496	1.39186
WBGene00001061	1.39128
WBGene00020761	1.39117
WBGene00013808	1.39094
WBGene00001016	1.3901
WBGene00006957	1.38996
WBGene00015023	1.3899
WBGene00001027	1.38924
WBGene00016889	1.38887
WBGene00010367	1.38886
WBGene00021613	1.38857
WBGene00004427	1.38851
WBGene00004462	1.38849
WBGene00001482	1.38832
WBGene00010279	1.38809
WBGene00010416	1.38808
WBGene00009659	1.38785
WBGene00000416	1.38754
WBGene00013355	1.38723
WBGene00019275	1.38715
WBGene00020936	1.38705
WBGene00001933	1.387
WBGene00003603	1.387
WBGene00013109	1.38692
WBGene00003060	1.38661
WBGene00008218	1.38643
WBGene00008683	1.38635
WBGene00012192	1.3863
WBGene00004015	1.38604
WBGene00020037	1.38571
WBGene00016194	1.3856
WBGene00007144	1.38518
WBGene00006977	1.38496
WBGene00004463	1.38482
WBGene00021660	1.38443
WBGene00018863	1.38405
WBGene00004505	1.38402
WBGene00016582	1.38349
WBGene00000423	1.38309
WBGene00011311	1.38287
WBGene00020171	1.38274
WBGene00018932	1.38254
WBGene00016971	1.38245
WBGene00012564	1.38239
WBGene00021363	1.38208
WBGene00010941	1.38159
WBGene00015235	1.38158
WBGene00008430	1.38156
WBGene00018285	1.38155
WBGene00001365	1.38132
WBGene00009666	1.38103
WBGene00006512	1.38093
WBGene00021276	1.38069
WBGene00015418	1.38064
WBGene00014014	1.38058
WBGene00004308	1.38001
WBGene00012828	1.37979
WBGene00011216	1.37971
WBGene00004136	1.37929
WBGene00018161	1.37928
WBGene00020412	1.37804
WBGene00001972	1.37802
WBGene00015450	1.37785
WBGene00016318	1.37755
WBGene00003592	1.37734
WBGene00003804	1.37714
WBGene00004189	1.37702
WBGene00002078	1.37632
WBGene00021357	1.37632
WBGene00195841	1.37585
WBGene00012734	1.37547
WBGene00014036	1.37544
WBGene00002207	1.37532
WBGene00013482	1.37475
WBGene00006733	1.37472
WBGene00017934	1.37467
WBGene00011538	1.37463
WBGene00013223	1.37458
WBGene00009996	1.37434
WBGene00007329	1.37426
WBGene00010908	1.37367
WBGene00022455	1.37338
WBGene00003791	1.37318
WBGene00018674	1.3731
WBGene00009364	1.37247
WBGene00008767	1.37239
WBGene00017161	1.37165
WBGene00007235	1.37151
WBGene00006711	1.37123
WBGene00018431	1.37118
WBGene00001166	1.37092
WBGene00004333	1.37039
WBGene00000931	1.37023
WBGene00007534	1.37004
WBGene00013958	1.36996
WBGene00004204	1.3696
WBGene00017855	1.36952
WBGene00019698	1.36935
WBGene00021920	1.36935
WBGene00019692	1.36934
WBGene00004373	1.36909
WBGene00001526	1.36883
WBGene00003184	1.36877
WBGene00007062	1.36836
WBGene00005663	1.36823
WBGene00007017	1.3682
WBGene00003415	1.36814
WBGene00010420	1.3679
WBGene00002032	1.36754
WBGene00010458	1.36747
WBGene00016202	1.36706
WBGene00006499	1.36687
WBGene00020389	1.36685
WBGene00007972	1.36663
WBGene00001259	1.36606
WBGene00013862	1.36601
WBGene00007731	1.36591
WBGene00001598	1.36557
WBGene00001635	1.36543
WBGene00001746	1.36524
WBGene00004188	1.36495
WBGene00001095	1.36478
WBGene00020932	1.36469
WBGene00022350	1.36459
WBGene00000764	1.3645
WBGene00015809	1.36436
WBGene00006976	1.3642
WBGene00012678	1.36369
WBGene00015754	1.3632
WBGene00003393	1.36311
WBGene00007111	1.36303
WBGene00006379	1.36288
WBGene00044483	1.36237
WBGene00021596	1.36188
WBGene00003948	1.36178
WBGene00012693	1.36119
WBGene00020499	1.36114
WBGene00021829	1.36078
WBGene00013924	1.36056
WBGene00004088	1.36035
WBGene00008766	1.36021
WBGene00001833	1.36007
WBGene00016960	1.35972
WBGene00001607	1.35908
WBGene00007433	1.35892
WBGene00020821	1.35857
WBGene00004469	1.35846
WBGene00021292	1.3583
WBGene00019807	1.35797
WBGene00021068	1.35747
WBGene00008852	1.35693
WBGene00020166	1.35688
WBGene00001372	1.3563
WBGene00009662	1.35628
WBGene00006940	1.35596
WBGene00000517	1.35591
WBGene00023409	1.35582
WBGene00007986	1.35576
WBGene00020819	1.35562
WBGene00018339	1.35552
WBGene00006516	1.35541
WBGene00019218	1.35519
WBGene00006988	1.35508
WBGene00004862	1.35481
WBGene00010778	1.35469
WBGene00002261	1.35469
WBGene00018893	1.35433
WBGene00017760	1.35429
WBGene00009098	1.35412
WBGene00016617	1.35396
WBGene00007554	1.35343
WBGene00010620	1.35326
WBGene00012964	1.35317
WBGene00019544	1.35294
WBGene00000592	1.35283
WBGene00017984	1.35258
WBGene00022335	1.35238
WBGene00018769	1.35206
WBGene00004324	1.35162
WBGene00014115	1.35158
WBGene00019162	1.35158
WBGene00001869	1.35148
WBGene00008183	1.35142
WBGene00003002	1.35134
WBGene00004323	1.35114
WBGene00017532	1.351
WBGene00018090	1.35093
WBGene00004439	1.35026
WBGene00004340	1.34998
WBGene00000199	1.34981
WBGene00000899	1.34973
WBGene00015330	1.3497
WBGene00013340	1.34955
WBGene00022193	1.34875
WBGene00021465	1.3487
WBGene00003777	1.34834
WBGene00002297	1.34825
WBGene00004914	1.34745
WBGene00010283	1.34737
WBGene00011980	1.347
WBGene00000818	1.34675
WBGene00015642	1.34635
WBGene00020684	1.34598
WBGene00016392	1.34583
WBGene00005006	1.34529
WBGene00004178	1.34516
WBGene00014938	1.34507
WBGene00007386	1.34501
WBGene00014151	1.34468
WBGene00022453	1.34459
WBGene00015731	1.34335
WBGene00004501	1.34324
WBGene00013687	1.34322
WBGene00023405	1.34307
WBGene00016701	1.34203
WBGene00012347	1.342
WBGene00018812	1.34197
WBGene00019771	1.34165
WBGene00006737	1.34151
WBGene00010828	1.34112
WBGene00017134	1.34104
WBGene00006703	1.34091
WBGene00022192	1.3409
WBGene00015194	1.34049
WBGene00015702	1.33963
WBGene00007762	1.33933
WBGene00007355	1.33913
WBGene00013253	1.33895
WBGene00011410	1.33889
WBGene00013595	1.3388
WBGene00001049	1.33878
WBGene00017774	1.33868
WBGene00007703	1.33821
WBGene00019678	1.33821
WBGene00015011	1.33809
WBGene00013544	1.33788
WBGene00000863	1.33734
WBGene00012479	1.33717
WBGene00010195	1.33707
WBGene00009122	1.3364
WBGene00003921	1.336
WBGene00012972	1.33548
WBGene00000146	1.33466
WBGene00018290	1.33461
WBGene00010351	1.33333
WBGene00004322	1.33307
WBGene00010562	1.33292
WBGene00022401	1.33264
WBGene00013994	1.33254
WBGene00021467	1.33237
WBGene00001661	1.33225
WBGene00012718	1.33198
WBGene00020185	1.33158
WBGene00015207	1.33143
WBGene00021049	1.33127
WBGene00021929	1.33119
WBGene00010479	1.33092
WBGene00019199	1.33085
WBGene00016326	1.33032
WBGene00017989	1.33026
WBGene00021899	1.33021
WBGene00010665	1.32957
WBGene00019002	1.32955
WBGene00007195	1.32946
WBGene00009191	1.32941
WBGene00008345	1.32934
WBGene00019833	1.32928
WBGene00001284	1.3292
WBGene00010306	1.32901
WBGene00002077	1.32775
WBGene00009266	1.32741
WBGene00011775	1.32658
WBGene00045357	1.32641
WBGene00000274	1.32634
WBGene00001596	1.32602
WBGene00016443	1.32597
WBGene00017137	1.32593
WBGene00010552	1.32561
WBGene00001232	1.32544
WBGene00014218	1.32521
WBGene00019821	1.32506
WBGene00012674	1.32495
WBGene00021832	1.32464
WBGene00004488	1.32458
WBGene00003636	1.32451
WBGene00006062	1.3244
WBGene00009444	1.32431
WBGene00007436	1.3241
WBGene00003792	1.32406
WBGene00003925	1.32387
WBGene00004984	1.32362
WBGene00015581	1.3233
WBGene00001162	1.32303
WBGene00000815	1.32295
WBGene00014123	1.32294
WBGene00004460	1.3225
WBGene00002957	1.3223
WBGene00004510	1.32171
WBGene00002074	1.32164
WBGene00013131	1.32164
WBGene00017165	1.32163
WBGene00019595	1.32119
WBGene00007789	1.32113
WBGene00017800	1.32111
WBGene00022882	1.32111
WBGene00000772	1.32096
WBGene00011087	1.32088
WBGene00003405	1.32082
WBGene00006996	1.3207
WBGene00018967	1.32054
WBGene00003161	1.32047
WBGene00022776	1.32046
WBGene00019087	1.31985
WBGene00004271	1.31985
WBGene00007797	1.3196
WBGene00012976	1.31923
WBGene00009994	1.31922
WBGene00001860	1.31915
WBGene00011580	1.31897
WBGene00003599	1.3189
WBGene00009128	1.31868
WBGene00012887	1.3185
WBGene00019762	1.31842
WBGene00014054	1.31829
WBGene00022855	1.31742
WBGene00194906	1.31701
WBGene00018509	1.3168
WBGene00004086	1.31673
WBGene00017895	1.31644
WBGene00015007	1.31593
WBGene00022118	1.31574
WBGene00011834	1.31547
WBGene00000158	1.31532
WBGene00004339	1.31526
WBGene00007500	1.3152
WBGene00019747	1.31516
WBGene00015308	1.31507
WBGene00077643	1.31469
WBGene00013668	1.31454
WBGene00020269	1.3145
WBGene00021351	1.31428
WBGene00000464	1.31408
WBGene00003507	1.31404
WBGene00022306	1.31345
WBGene00007333	1.31337
WBGene00001001	1.31336
WBGene00001043	1.3133
WBGene00017547	1.31327
WBGene00020092	1.31297
WBGene00013591	1.31282
WBGene00007030	1.31269
WBGene00007579	1.31264
WBGene00022044	1.31249
WBGene00011333	1.3119
WBGene00006514	1.31163
WBGene00019326	1.31152
WBGene00004274	1.31131
WBGene00016250	1.31108
WBGene00001840	1.31097
WBGene00014209	1.31088
WBGene00004888	1.31083
WBGene00006374	1.31074
WBGene00003789	1.31074
WBGene00003815	1.31054
WBGene00021534	1.31025
WBGene00001491	1.31016
WBGene00006563	1.31007
WBGene00001411	1.3099
WBGene00009119	1.30978
WBGene00000939	1.30908
WBGene00020316	1.30888
WBGene00004125	1.30876
WBGene00004085	1.30865
WBGene00016128	1.30835
WBGene00016702	1.30776
WBGene00009254	1.30773
WBGene00007189	1.30751
WBGene00019219	1.30706
WBGene00006307	1.30702
WBGene00009918	1.30684
WBGene00012647	1.30667
WBGene00011338	1.30636
WBGene00017300	1.30625
WBGene00021901	1.3061
WBGene00016444	1.30594
WBGene00003926	1.3059
WBGene00006707	1.30553
WBGene00013004	1.30515
WBGene00003022	1.30515
WBGene00012974	1.30493
WBGene00013727	1.30484
WBGene00017062	1.30453
WBGene00003222	1.3045
WBGene00022603	1.30446
WBGene00021830	1.30417
WBGene00013532	1.30395
WBGene00016653	1.30388
WBGene00009374	1.30376
WBGene00013307	1.30375
WBGene00017078	1.30333
WBGene00000264	1.30331
WBGene00004464	1.30322
WBGene00000292	1.30309
WBGene00001007	1.30303
WBGene00014258	1.3028
WBGene00010048	1.30149
WBGene00270322	1.30133
WBGene00011064	1.3013
WBGene00013344	1.30123
WBGene00002059	1.30116
WBGene00007773	1.30108
WBGene00009946	1.30104
WBGene00021828	1.30099
WBGene00018904	1.30082
WBGene00001563	1.30062
WBGene00019120	1.30057
WBGene00004477	1.30007
WBGene00021476	1.29993
WBGene00003994	1.29973
WBGene00004116	1.29909
WBGene00004355	1.29902
WBGene00006958	1.29893
WBGene00013557	1.29883
WBGene00006437	1.29858
WBGene00004315	1.29852
WBGene00045163	1.29789
WBGene00003119	1.29783
WBGene00022531	1.29753
WBGene00021938	1.29752
WBGene00010781	1.29715
WBGene00022034	1.29662
WBGene00003989	1.29638
WBGene00012030	1.2961
WBGene00003784	1.29595
WBGene00012245	1.29584
WBGene00001585	1.29559
WBGene00013019	1.2952
WBGene00011016	1.29501
WBGene00000872	1.29448
WBGene00002244	1.29419
WBGene00010038	1.29391
WBGene00019254	1.29376
WBGene00008338	1.29361
WBGene00013140	1.2936
WBGene00001336	1.29345
WBGene00004437	1.29339
WBGene00010015	1.29327
WBGene00001922	1.29205
WBGene00018014	1.29195
WBGene00006943	1.29188
WBGene00001427	1.29081
WBGene00013599	1.29074
WBGene00012738	1.29073
WBGene00001978	1.2906
WBGene00002061	1.29051
WBGene00013350	1.29011
WBGene00020443	1.29009
WBGene00004882	1.29004
WBGene00019296	1.28979
WBGene00001131	1.28968
WBGene00004268	1.28956
WBGene00003258	1.28951
WBGene00013792	1.28949
WBGene00019712	1.28902
WBGene00006724	1.28895
WBGene00006936	1.28848
WBGene00020993	1.28834
WBGene00015346	1.28816
WBGene00009267	1.28787
WBGene00013219	1.28773
WBGene00003660	1.28755
WBGene00010942	1.28753
WBGene00022114	1.28681
WBGene00001040	1.28672
WBGene00001030	1.28672
WBGene00008555	1.28625
WBGene00004721	1.28586
WBGene00003920	1.28582
WBGene00006934	1.28571
WBGene00019429	1.2857
WBGene00020953	1.28568
WBGene00010141	1.28548
WBGene00004456	1.28546
WBGene00001744	1.28527
WBGene00012472	1.28523
WBGene00010582	1.28472
WBGene00010363	1.28437
WBGene00014087	1.28425
WBGene00013201	1.28378
WBGene00195063	1.28359
WBGene00006941	1.28338
WBGene00001498	1.28338
WBGene00003953	1.28333
WBGene00004775	1.28331
WBGene00013188	1.2829
WBGene00001412	1.28258
WBGene00007135	1.28247
WBGene00004425	1.2824
WBGene00044001	1.28218
WBGene00015101	1.28217
WBGene00011629	1.28204
WBGene00013220	1.28168
WBGene00002076	1.28155
WBGene00007171	1.28147
WBGene00008387	1.2814
WBGene00018892	1.28123
WBGene00012206	1.28104
WBGene00007029	1.28098
WBGene00017245	1.28091
WBGene00007488	1.28087
WBGene00021826	1.28071
WBGene00015641	1.28042
WBGene00021508	1.28015
WBGene00004444	1.28013
WBGene00010626	1.27988
WBGene00012105	1.27981
WBGene00017746	1.27961
WBGene00018636	1.27931
WBGene00011146	1.27919
WBGene00010303	1.2789
WBGene00010687	1.27887
WBGene00006935	1.27882
WBGene00008452	1.27882
WBGene00003041	1.27854
WBGene00004756	1.27848
WBGene00016601	1.27845
WBGene00013017	1.2781
WBGene00044131	1.27808
WBGene00011758	1.27774
WBGene00008400	1.27713
WBGene00019276	1.27698
WBGene00021313	1.27694
WBGene00018902	1.27635
WBGene00021649	1.27608
WBGene00001566	1.27607
WBGene00013214	1.27564
WBGene00011631	1.27559
WBGene00001584	1.27526
WBGene00009656	1.27497
WBGene00001134	1.27495
WBGene00014111	1.27489
WBGene00012730	1.27441
WBGene00003422	1.27422
WBGene00018679	1.27417
WBGene00003790	1.27401
WBGene00010281	1.27393
WBGene00021058	1.27388
WBGene00050937	1.27364
WBGene00019719	1.27362
WBGene00021443	1.27362
WBGene00219803	1.27321
WBGene00000774	1.27314
WBGene00020719	1.27273
WBGene00013265	1.27246
WBGene00006974	1.27235
WBGene00007645	1.27219
WBGene00000094	1.27215
WBGene00020296	1.27191
WBGene00000548	1.27149
WBGene00006709	1.27139
WBGene00000227	1.27095
WBGene00008061	1.27086
WBGene00004881	1.27078
WBGene00011885	1.27059
WBGene00005015	1.27031
WBGene00004051	1.2703
WBGene00006856	1.27011
WBGene00016793	1.26967
WBGene00003818	1.26949
WBGene00013735	1.2694
WBGene00022218	1.26922
WBGene00022852	1.2689
WBGene00009065	1.26864
WBGene00001834	1.26838
WBGene00015186	1.2682
WBGene00001562	1.26789
WBGene00012524	1.26787
WBGene00020287	1.2677
WBGene00012966	1.26732
WBGene00009925	1.26725
WBGene00008429	1.26723
WBGene00044094	1.2671
WBGene00001865	1.26699
WBGene00006382	1.26685
WBGene00003952	1.26659
WBGene00000796	1.26656
WBGene00021311	1.26653
WBGene00020935	1.26627
WBGene00021541	1.26573
WBGene00019836	1.2655
WBGene00005010	1.26548
WBGene00014012	1.26527
WBGene00017686	1.26506
WBGene00008444	1.26493
WBGene00018131	1.26483
WBGene00018017	1.26476
WBGene00012559	1.26468
WBGene00022672	1.26459
WBGene00008174	1.26457
WBGene00021752	1.26455
WBGene00007788	1.26453
WBGene00015147	1.26411
WBGene00006740	1.26393
WBGene00015486	1.26391
WBGene00022516	1.26387
WBGene00006768	1.26329
WBGene00014011	1.2632
WBGene00003009	1.26314
WBGene00012895	1.26308
WBGene00007556	1.26298
WBGene00021200	1.26278
WBGene00021756	1.26277
WBGene00006805	1.26265
WBGene00010428	1.26261
WBGene00001974	1.26239
WBGene00220019	1.2622
WBGene00007615	1.26196
WBGene00016021	1.26169
WBGene00022203	1.26164
WBGene00001337	1.26155
WBGene00020103	1.26152
WBGene00019458	1.26124
WBGene00015074	1.26096
WBGene00019877	1.26077
WBGene00001358	1.26077
WBGene00015481	1.26032
WBGene00009952	1.26002
WBGene00012243	1.25971
WBGene00008082	1.25967
WBGene00007028	1.25942
WBGene00008405	1.25925
WBGene00012341	1.25924
WBGene00009132	1.25913
WBGene00022618	1.25912
WBGene00008531	1.25911
WBGene00020036	1.25893
WBGene00017830	1.25889
WBGene00000208	1.25863
WBGene00006394	1.25845
WBGene00020234	1.2583
WBGene00001580	1.2582
WBGene00009025	1.25805
WBGene00018891	1.25793
WBGene00011115	1.25773
WBGene00014018	1.25743
WBGene00004461	1.25726
WBGene00021563	1.25712
WBGene00009553	1.25672
WBGene00011122	1.25651
WBGene00004336	1.2555
WBGene00017053	1.25539
WBGene00010439	1.25528
WBGene00007628	1.2549
WBGene00008532	1.25489
WBGene00045055	1.25479
WBGene00007092	1.25459
WBGene00022427	1.25449
WBGene00016148	1.25434
WBGene00012756	1.25411
WBGene00004489	1.25401
WBGene00012167	1.25394
WBGene00000773	1.25389
WBGene00008118	1.25374
WBGene00017284	1.25361
WBGene00004755	1.25352
WBGene00010496	1.25318
WBGene00012650	1.25309
WBGene00020115	1.25299
WBGene00220015	1.25288
WBGene00010631	1.25276
WBGene00017373	1.25269
WBGene00017797	1.25268
WBGene00016167	1.25268
WBGene00000839	1.25254
WBGene00004726	1.25226
WBGene00022292	1.25209
WBGene00007087	1.25156
WBGene00016990	1.2513
WBGene00015176	1.25076
WBGene00021022	1.25051
WBGene00004449	1.24967
WBGene00016794	1.24923
WBGene00011897	1.24914
WBGene00015697	1.24828
WBGene00017317	1.24803
WBGene00013538	1.2478
WBGene00020480	1.24756
WBGene00021210	1.24745
WBGene00012562	1.24705
WBGene00019323	1.24687
WBGene00003827	1.24683
WBGene00017132	1.24674
WBGene00001874	1.24657
WBGene00011032	1.24635
WBGene00004916	1.24628
WBGene00007100	1.24614
WBGene00001060	1.24611
WBGene00008995	1.24596
WBGene00004411	1.24577
WBGene00000532	1.24566
WBGene00021662	1.24558
WBGene00016603	1.24553
WBGene00000875	1.24549
WBGene00006888	1.24548
WBGene00019075	1.2454
WBGene00000970	1.2452
WBGene00009784	1.24473
WBGene00011116	1.24471
WBGene00017016	1.24434
WBGene00007493	1.24408
WBGene00044204	1.24398
WBGene00021535	1.24395
WBGene00012111	1.24391
WBGene00012188	1.2439
WBGene00002804	1.2436
WBGene00016947	1.24312
WBGene00000996	1.24262
WBGene00013756	1.24183
WBGene00015229	1.24178
WBGene00004413	1.241
WBGene00008455	1.24062
WBGene00002182	1.24055
WBGene00003062	1.24022
WBGene00020970	1.23984
WBGene00000565	1.23969
WBGene00011275	1.23967
WBGene00017801	1.23959
WBGene00020718	1.23944
WBGene00003048	1.23935
WBGene00000838	1.23832
WBGene00017163	1.23822
WBGene00007587	1.23788
WBGene00011300	1.23767
WBGene00000090	1.23746
WBGene00006391	1.2373
WBGene00010676	1.23723
WBGene00001402	1.2372
WBGene00014096	1.23695
WBGene00010089	1.23681
WBGene00017997	1.23624
WBGene00022703	1.23622
WBGene00019953	1.23622
WBGene00001660	1.23595
WBGene00010480	1.23564
WBGene00006836	1.23546
WBGene00010730	1.23523
WBGene00010199	1.23499
WBGene00018808	1.23494
WBGene00011071	1.23492
WBGene00004389	1.23484
WBGene00017548	1.2344
WBGene00010616	1.23436
WBGene00006924	1.23433
WBGene00011940	1.23388
WBGene00000834	1.23381
WBGene00013252	1.23302
WBGene00001651	1.23269
WBGene00022149	1.23261
WBGene00006648	1.23138
WBGene00013530	1.23103
WBGene00006804	1.23094
WBGene00008948	1.23003
WBGene00004040	1.22988
WBGene00017217	1.22977
WBGene00012015	1.2287
WBGene00020762	1.22862
WBGene00004415	1.22862
WBGene00013598	1.22826
WBGene00015513	1.22797
WBGene00021295	1.22791
WBGene00009521	1.22788
WBGene00001090	1.22754
WBGene00014016	1.22732
WBGene00011959	1.22729
WBGene00021038	1.22724
WBGene00011597	1.22689
WBGene00022309	1.22634
WBGene00021932	1.22548
WBGene00011788	1.22472
WBGene00009452	1.22464
WBGene00000466	1.22392
WBGene00000846	1.22389
WBGene00015524	1.2237
WBGene00018925	1.22338
WBGene00000987	1.22315
WBGene00001081	1.223
WBGene00016060	1.22273
WBGene00021281	1.22262
WBGene00018830	1.22236
WBGene00006708	1.22192
WBGene00015806	1.22182
WBGene00016888	1.22162
WBGene00006932	1.22126
WBGene00044072	1.22054
WBGene00003576	1.22054
WBGene00021440	1.22051
WBGene00017699	1.21992
WBGene00001002	1.21974
WBGene00014015	1.21944
WBGene00194707	1.21906
WBGene00021350	1.219
WBGene00007010	1.2187
WBGene00003229	1.2183
WBGene00000887	1.21801
WBGene00021554	1.21793
WBGene00008645	1.21785
WBGene00017981	1.21782
WBGene00002335	1.21772
WBGene00004782	1.21767
WBGene00007581	1.21759
WBGene00077771	1.21699
WBGene00043060	1.21673
WBGene00022235	1.21662
WBGene00009064	1.2164
WBGene00023419	1.21602
WBGene00016524	1.21552
WBGene00009012	1.21519
WBGene00016169	1.2149
WBGene00011601	1.21471
WBGene00008921	1.21392
WBGene00017080	1.2139
WBGene00018814	1.21373
WBGene00021973	1.21346
WBGene00017304	1.2134
WBGene00015251	1.21338
WBGene00015978	1.21337
WBGene00021855	1.21324
WBGene00017607	1.21305
WBGene00021924	1.21293
WBGene00013877	1.21257
WBGene00010132	1.21217
WBGene00001340	1.21201
WBGene00018045	1.21194
WBGene00003800	1.21179
WBGene00018638	1.21176
WBGene00001510	1.21163
WBGene00006061	1.21144
WBGene00021014	1.21141
WBGene00007016	1.21103
WBGene00004254	1.21099
WBGene00009329	1.21047
WBGene00011143	1.21045
WBGene00000271	1.21012
WBGene00235356	1.20981
WBGene00013703	1.20933
WBGene00020999	1.20896
WBGene00010425	1.20875
WBGene00002152	1.20874
WBGene00014176	1.20873
WBGene00006562	1.20744
WBGene00198725	1.20676
WBGene00001950	1.20666
WBGene00016062	1.20644
WBGene00016140	1.20635
WBGene00000379	1.20623
WBGene00001160	1.20618
WBGene00020107	1.20613
WBGene00017967	1.20604
WBGene00010193	1.20586
WBGene00000813	1.20583
WBGene00018635	1.20578
WBGene00013674	1.20511
WBGene00045433	1.20506
WBGene00016418	1.20505
WBGene00008480	1.20456
WBGene00018230	1.20456
WBGene00010709	1.20381
WBGene00021334	1.20284
WBGene00011111	1.202
WBGene00012469	1.20187
WBGene00011605	1.20173
WBGene00020601	1.20156
WBGene00044650	1.20145
WBGene00006373	1.20111
WBGene00022150	1.20106
WBGene00017888	1.20101
WBGene00002363	1.20068
WBGene00000371	1.20041
WBGene00010629	1.20015
WBGene00004698	1.19958
WBGene00175030	1.19898
WBGene00021312	1.19875
WBGene00013680	1.19867
WBGene00014221	1.1985
WBGene00000202	1.19848
WBGene00010896	1.19834
WBGene00006434	1.19813
WBGene00008361	1.19797
WBGene00015943	1.19794
WBGene00019811	1.19787
WBGene00009987	1.19779
WBGene00011612	1.19773
WBGene00008639	1.19739
WBGene00010406	1.19733
WBGene00004343	1.19707
WBGene00006706	1.19689
WBGene00001258	1.19681
WBGene00009385	1.19648
WBGene00004214	1.19629
WBGene00006794	1.19629
WBGene00018423	1.19617
WBGene00011368	1.19591
WBGene00009341	1.1958
WBGene00010231	1.19516
WBGene00010664	1.19462
WBGene00013018	1.19436
WBGene00004896	1.19384
WBGene00015509	1.19359
WBGene00016352	1.19351
WBGene00013250	1.19312
WBGene00009322	1.19241
WBGene00016607	1.19207
WBGene00004187	1.19202
WBGene00016980	1.19201
WBGene00018846	1.19193
WBGene00022599	1.19192
WBGene00004975	1.1918
WBGene00006785	1.19149
WBGene00012768	1.19146
WBGene00003059	1.19118
WBGene00001595	1.19064
WBGene00013738	1.19046
WBGene00012348	1.19042
WBGene00001303	1.18995
WBGene00000183	1.1899
WBGene00000566	1.18804
WBGene00019295	1.18801
WBGene00021392	1.18785
WBGene00003559	1.18775
WBGene00003034	1.18768
WBGene00022166	1.18743
WBGene00016409	1.18729
WBGene00003392	1.18694
WBGene00004244	1.18687
WBGene00003950	1.18685
WBGene00001130	1.18682
WBGene00017891	1.18677
WBGene00021359	1.18676
WBGene00000097	1.18647
WBGene00016045	1.18608
WBGene00003067	1.18579
WBGene00010405	1.18579
WBGene00021714	1.18547
WBGene00016837	1.18529
WBGene00006392	1.18519
WBGene00010044	1.1851
WBGene00003586	1.18507
WBGene00018335	1.18499
WBGene00011058	1.18478
WBGene00002148	1.18471
WBGene00009013	1.18468
WBGene00010259	1.1846
WBGene00021155	1.184
WBGene00010130	1.18399
WBGene00012389	1.18387
WBGene00004302	1.18354
WBGene00011281	1.18353
WBGene00002276	1.18344
WBGene00019432	1.18327
WBGene00000235	1.1828
WBGene00044025	1.18253
WBGene00007578	1.18232
WBGene00022281	1.1823
WBGene00000871	1.1817
WBGene00009007	1.18145
WBGene00006931	1.18117
WBGene00003656	1.18114
WBGene00011259	1.18096
WBGene00001511	1.18089
WBGene00022460	1.18023
WBGene00012714	1.18003
WBGene00020442	1.17981
WBGene00000231	1.17976
WBGene00006713	1.17974
WBGene00017770	1.17964
WBGene00004481	1.17868
WBGene00012209	1.17832
WBGene00015766	1.17812
WBGene00020481	1.17764
WBGene00016150	1.17753
WBGene00020827	1.17742
WBGene00013966	1.17726
WBGene00004386	1.17689
WBGene00016353	1.17615
WBGene00015538	1.17595
WBGene00018512	1.17509
WBGene00019947	1.17489
WBGene00004341	1.17412
WBGene00016676	1.17284
WBGene00007023	1.17245
WBGene00001558	1.17213
WBGene00007880	1.17194
WBGene00022762	1.17167
WBGene00011068	1.17146
WBGene00010622	1.17038
[truncated: 714 more rows]

## Sheet: simr-1 25C gen2 down
Supplementary File 3, Sheet 6: Small RNAs significantly down-regulated 2 fold or greater in simr-1 mutant animals at 25ºC for two generations.
Gene name	log2FoldChange (relative to wt gen1)	log2FoldChange (relative to wt gen2)
WBGene00022438	-7.35425	-7.7044
WBGene00007600	-6.72697	-6.83123
WBGene00017106	-6.63404	-6.30762
WBGene00019370	-6.6217	-6.44871
WBGene00001705	-6.52005	-5.5905
WBGene00012572	-6.07182	-5.94332
WBGene00017644	-5.80182	-5.53587
WBGene00008776	-5.66469	-5.38812
WBGene00013499	-5.66041	-5.50542
WBGene00001955	-5.65836	-5.6375
WBGene00021835	-5.60478	-5.50021
WBGene00003579	-5.54572	-5.42333
WBGene00016273	-5.44394	-5.39828
WBGene00021479	-5.36866	-5.71595
WBGene00019538	-5.33961	-5.55412
WBGene00004778	-5.27755	-4.08401
WBGene00022307	-5.26791	-4.75183
WBGene00008890	-5.18816	-5.46909
WBGene00022276	-5.15281	-5.72761
WBGene00010226	-5.14385	-5.28781
WBGene00019909	-5.12629	-4.46946
WBGene00019044	-5.09783	-5.06708
WBGene00012854	-5.09006	-4.38748
WBGene00021927	-5.08181	-4.62124
WBGene00001666	-5.06958	-5.13293
WBGene00019267	-5.04003	-5.23456
WBGene00219675	-4.9909	-5.19013
WBGene00013387	-4.97806	-4.81719
WBGene00009005	-4.92429	-4.88661
WBGene00004196	-4.91588	-4.8537
WBGene00019545	-4.8818	-4.64625
WBGene00017099	-4.87228	-4.69441
WBGene00017303	-4.83012	-4.70027
WBGene00044502	-4.82912	-5.17038
WBGene00009361	-4.81073	-3.74886
WBGene00021353	-4.76044	-4.67538
WBGene00012407	-4.71929	-4.00638
WBGene00012554	-4.71687	-4.51201
WBGene00219413	-4.71541	-4.56215
WBGene00012759	-4.70935	-5.3595
WBGene00007275	-4.66268	-4.66739
WBGene00014033	-4.65628	-3.73123
WBGene00013736	-4.64693	-4.5815
WBGene00009657	-4.62261	-4.33739
WBGene00020988	-4.58859	-4.08669
WBGene00195253	-4.56336	-4.01088
WBGene00017698	-4.55999	-3.52839
WBGene00000903	-4.54122	-3.79624
WBGene00012866	-4.54024	-4.84293
WBGene00013802	-4.53466	-4.48424
WBGene00018383	-4.50244	-4.50445
WBGene00003387	-4.49583	-4.59442
WBGene00007750	-4.48173	-4.05574
WBGene00015020	-4.47363	-3.95022
WBGene00011592	-4.464	-4.27895
WBGene00007679	-4.45961	-4.57459
WBGene00017944	-4.45461	-4.12143
WBGene00023209	-4.45065	-4.26426
WBGene00003124	-4.44791	-4.37434
WBGene00021008	-4.43796	-4.40497
WBGene00012289	-4.42417	-4.62549
WBGene00009288	-4.40149	-4.43463
WBGene00019665	-4.35929	-4.37348
WBGene00044468	-4.35542	-3.74138
WBGene00007079	-4.34881	-4.05163
WBGene00014807	-4.32672	-3.52333
WBGene00017515	-4.31593	-4.05904
WBGene00007722	-4.30454	-4.36229
WBGene00005061	-4.29672	-4.41844
WBGene00020540	-4.29586	-3.08938
WBGene00022358	-4.29386	-4.64673
WBGene00043990	-4.28434	-4.00759
WBGene00007928	-4.26743	-4.07047
WBGene00015111	-4.26723	-3.03737
WBGene00017354	-4.26272	-4.43191
WBGene00022315	-4.25518	-3.40118
WBGene00007405	-4.24903	-3.49995
WBGene00021301	-4.23976	-3.499
WBGene00007926	-4.2355	-3.62631
WBGene00016871	-4.23501	-3.14841
WBGene00044530	-4.2323	-4.68205
WBGene00007489	-4.21827	-3.81337
WBGene00206474	-4.20713	-4.30298
WBGene00019546	-4.18291	-3.85235
WBGene00002100	-4.18048	-4.13391
WBGene00017148	-4.14125	-4.45342
WBGene00014148	-4.13432	-3.72143
WBGene00017100	-4.12965	-3.86681
WBGene00016165	-4.09456	-4.11722
WBGene00021505	-4.0655	-3.89388
WBGene00007076	-4.06501	-3.66894
WBGene00020352	-4.06254	-2.99829
WBGene00043989	-4.05533	-3.66711
WBGene00194747	-4.0492	-4.39132
WBGene00001745	-4.04598	-3.85394
WBGene00269433	-4.03412	-4.02537
WBGene00021790	-4.01066	-3.74816
WBGene00013812	-4.00691	-4.47242
WBGene00219317	-3.96975	-3.71546
WBGene00016758	-3.95692	-3.56821
WBGene00012671	-3.91081	-4.07864
WBGene00014233	-3.89572	-3.88961
WBGene00007988	-3.89214	-3.70715
WBGene00021148	-3.87628	-3.61512
WBGene00206511	-3.87536	-3.44551
WBGene00018439	-3.86468	-3.31215
WBGene00000819	-3.86078	-3.15402
WBGene00015407	-3.84963	-3.79792
WBGene00003480	-3.84744	-3.55599
WBGene00009081	-3.83481	-3.84117
WBGene00001764	-3.83278	-4.30078
WBGene00009635	-3.8295	-3.58557
WBGene00013692	-3.82868	-4.98606
WBGene00021817	-3.8252	-3.64677
WBGene00021096	-3.81586	-3.92318
WBGene00002088	-3.81512	-3.90001
WBGene00009044	-3.80808	-3.60928
WBGene00003090	-3.80343	-3.73092
WBGene00044414	-3.77983	-4.02225
WBGene00002017	-3.77135	-4.50984
WBGene00014906	-3.77015	-3.08379
WBGene00011971	-3.76224	-3.76128
WBGene00010449	-3.75964	-4.484
WBGene00018241	-3.75827	-4.0604
WBGene00017979	-3.74203	-3.38184
WBGene00018662	-3.73737	-3.56157
WBGene00015896	-3.73577	-3.51306
WBGene00045043	-3.71325	-3.72003
WBGene00011575	-3.70833	-4.13341
WBGene00044482	-3.69858	-3.97696
WBGene00002015	-3.69716	-4.38814
WBGene00008421	-3.68455	-3.78841
WBGene00013509	-3.68051	-2.74625
WBGene00011393	-3.67292	-3.65201
WBGene00010365	-3.65754	-2.24554
WBGene00012985	-3.645	-2.99956
WBGene00000784	-3.6415	-3.68903
WBGene00017737	-3.63592	-3.71132
WBGene00007395	-3.6278	-3.65846
WBGene00015115	-3.62252	-4.00702
WBGene00004130	-3.61	-2.92533
WBGene00013009	-3.59344	-3.16818
WBGene00045277	-3.57608	-2.89002
WBGene00012911	-3.57238	-3.56976
WBGene00021547	-3.57008	-3.65004
WBGene00009917	-3.55977	-3.32211
WBGene00018309	-3.55244	-2.86176
WBGene00021079	-3.54336	-2.92061
WBGene00018433	-3.53571	-3.346
WBGene00004933	-3.51574	-3.73109
WBGene00013830	-3.51284	-2.80593
WBGene00008690	-3.50011	-3.77345
WBGene00022642	-3.49744	-3.46543
WBGene00043992	-3.4946	-3.16261
WBGene00201351	-3.49369	-3.65424
WBGene00009558	-3.48709	-3.4405
WBGene00015735	-3.46604	-2.53744
WBGene00018761	-3.46443	-3.16815
WBGene00006784	-3.45772	-3.47444
WBGene00021260	-3.45309	-3.23588
WBGene00020318	-3.44324	-2.90586
WBGene00022311	-3.43518	-2.56161
WBGene00013613	-3.43324	-3.28885
WBGene00009468	-3.4274	-3.27046
WBGene00015913	-3.42621	-2.73316
WBGene00013777	-3.42541	-2.92673
WBGene00020450	-3.41615	-3.35948
WBGene00013602	-3.41572	-2.86181
WBGene00012486	-3.41571	-2.91789
WBGene00021039	-3.41381	-3.29094
WBGene00019899	-3.40823	-3.52572
WBGene00007119	-3.40312	-2.95227
WBGene00015868	-3.39826	-3.4438
WBGene00020486	-3.39685	-3.08922
WBGene00022608	-3.39296	-3.61067
WBGene00012717	-3.39269	-3.6536
WBGene00013222	-3.38373	-2.44813
WBGene00021678	-3.37986	-3.13471
WBGene00003091	-3.35675	-3.36941
WBGene00008858	-3.35597	-3.49383
WBGene00020451	-3.35036	-3.05423
WBGene00019261	-3.34623	-3.27122
WBGene00010587	-3.34168	-3.33077
WBGene00219721	-3.3219	-2.77702
WBGene00220089	-3.31298	-3.71139
WBGene00001638	-3.30559	-2.81282
WBGene00206532	-3.3046	-3.00665
WBGene00044504	-3.30441	-3.31474
WBGene00020756	-3.27627	-1.98621
WBGene00007941	-3.27566	-2.94558
WBGene00022736	-3.27356	-2.63219
WBGene00003093	-3.27326	-3.02346
WBGene00196465	-3.27284	-3.41943
WBGene00021095	-3.26483	-3.1054
WBGene00007672	-3.26446	-3.79742
WBGene00021274	-3.26229	-3.30303
WBGene00009697	-3.2556	-3.85024
WBGene00077728	-3.2527	-3.52421
WBGene00019316	-3.24717	-2.88195
WBGene00015887	-3.23606	-3.00962
WBGene00011200	-3.22341	-3.76059
WBGene00206419	-3.22175	-4.11158
WBGene00006928	-3.2202	-4.08547
WBGene00022497	-3.21406	-2.68742
WBGene00011809	-3.21304	-2.51156
WBGene00006927	-3.20726	-3.97332
WBGene00021668	-3.20118	-2.64219
WBGene00010989	-3.20054	-3.19357
WBGene00022843	-3.19554	-2.52775
WBGene00021976	-3.19525	-3.54206
WBGene00013563	-3.19266	-3.14619
WBGene00023404	-3.18942	-1.88986
WBGene00002019	-3.16774	-3.86631
WBGene00012144	-3.15625	-2.79519
WBGene00002020	-3.15357	-3.82135
WBGene00021463	-3.15216	-2.03306
WBGene00021768	-3.15015	-2.52364
WBGene00022446	-3.14586	-2.66844
WBGene00022682	-3.1321	-2.85615
WBGene00235300	-3.11998	-3.50759
WBGene00011733	-3.11311	-2.84361
WBGene00021913	-3.11186	-3.14535
WBGene00017189	-3.09053	-2.0139
WBGene00000402	-3.08853	-3.22114
WBGene00019442	-3.0825	-1.99442
WBGene00007165	-3.07838	-2.22194
WBGene00018593	-3.07333	-2.45575
WBGene00008620	-3.06939	-2.73288
WBGene00018929	-3.0655	-2.63984
WBGene00000214	-3.06504	-2.97306
WBGene00015096	-3.06136	-3.48534
WBGene00012699	-3.05854	-2.94206
WBGene00021458	-3.057	-3.16914
WBGene00000959	-3.05614	-2.35728
WBGene00017453	-3.04716	-4.06457
WBGene00044268	-3.04626	-3.26354
WBGene00009142	-3.04556	-2.29656
WBGene00000518	-3.03944	-2.80333
WBGene00006570	-3.03518	-2.62432
WBGene00000781	-3.03426	-2.7337
WBGene00022441	-3.02951	-3.38465
WBGene00000219	-3.02893	-3.05352
WBGene00006929	-3.01438	-3.91909
WBGene00017630	-3.00269	-2.57984
WBGene00014944	-2.99963	-2.62169
WBGene00219771	-2.99339	-2.26738
WBGene00014888	-2.98313	-3.29607
WBGene00009889	-2.98211	-3.10831
WBGene00194896	-2.97735	-2.71843
WBGene00017225	-2.96067	-1.98838
WBGene00022131	-2.95626	-3.11031
WBGene00194956	-2.95572	-2.40654
WBGene00010585	-2.9545	-2.3281
WBGene00013511	-2.94889	-2.12281
WBGene00016216	-2.9434	-3.00343
WBGene00016299	-2.9311	-3.18412
WBGene00013429	-2.91123	-3.07323
WBGene00008353	-2.90988	-2.62526
WBGene00001523	-2.90982	-2.66871
WBGene00007453	-2.9051	-2.0794
WBGene00045366	-2.90163	-2.85102
WBGene00004827	-2.90049	-3.13621
WBGene00012549	-2.8984	-3.78506
WBGene00020730	-2.89733	-3.08903
WBGene00006640	-2.87052	-2.18359
WBGene00012981	-2.86925	-3.40772
WBGene00006930	-2.85896	-3.65196
WBGene00000554	-2.84737	-2.84606
WBGene00014090	-2.84709	-2.22015
WBGene00005387	-2.83666	-2.28268
WBGene00012796	-2.83607	-1.74487
WBGene00015153	-2.827	-2.93113
WBGene00012909	-2.82163	-3.04131
WBGene00018615	-2.82148	-1.69276
WBGene00019030	-2.81702	-2.99703
WBGene00016661	-2.80977	-2.40876
WBGene00017631	-2.80842	-1.88586
WBGene00018933	-2.80642	-2.49788
WBGene00022519	-2.79534	-2.92876
WBGene00022209	-2.78459	-2.57934
WBGene00045387	-2.77414	-3.0189
WBGene00012239	-2.76925	-2.85938
WBGene00018186	-2.76901	-2.73656
WBGene00019159	-2.76476	-2.48244
WBGene00003593	-2.75471	-1.84754
WBGene00045056	-2.75165	-2.79539
WBGene00022225	-2.75087	-2.49345
WBGene00235340	-2.75075	-2.63125
WBGene00010371	-2.74721	-1.99105
WBGene00012107	-2.74591	-2.42118
WBGene00012492	-2.7337	-3.05789
WBGene00043534	-2.73072	-2.57776
WBGene00016264	-2.72693	-3.14816
WBGene00020551	-2.72538	-2.76705
WBGene00006767	-2.72493	-2.86006
WBGene00008714	-2.72195	-2.3569
WBGene00008986	-2.70829	-2.95953
WBGene00000056	-2.6946	-3.30347
WBGene00015492	-2.6936	-2.82174
WBGene00014920	-2.69341	-2.80575
WBGene00007153	-2.69322	-2.51884
WBGene00022712	-2.69022	-2.5539
WBGene00006962	-2.68405	-2.18009
WBGene00019170	-2.68235	-3.33023
WBGene00013403	-2.68	-2.82145
WBGene00010242	-2.67907	-2.65608
WBGene00014206	-2.66476	-2.72583
WBGene00022129	-2.66338	-2.75769
WBGene00022039	-2.65198	-2.9501
WBGene00018577	-2.64647	-2.09587
WBGene00011850	-2.6376	-2.82126
WBGene00012238	-2.6369	-2.79562
WBGene00000216	-2.63502	-2.46216
WBGene00017419	-2.63501	-2.86897
WBGene00001247	-2.6348	-2.57162
WBGene00012096	-2.63294	-2.87211
WBGene00000535	-2.62961	-2.91406
WBGene00020256	-2.6285	-2.98934
WBGene00018804	-2.62829	-2.87844
WBGene00008945	-2.62725	-2.59906
WBGene00004347	-2.62683	-2.70136
WBGene00013062	-2.62667	-2.38222
WBGene00012970	-2.6254	-2.98135
WBGene00013352	-2.62416	-2.64606
WBGene00008500	-2.62199	-2.49615
WBGene00010690	-2.61083	-2.581
WBGene00011829	-2.60729	-2.64674
WBGene00012452	-2.60326	-1.95139
WBGene00014956	-2.59799	-2.20193
WBGene00015837	-2.59337	-2.10144
WBGene00013672	-2.5921	-2.50016
WBGene00014130	-2.58266	-2.66165
WBGene00011777	-2.57777	-2.76957
WBGene00000075	-2.57723	-2.09117
WBGene00014207	-2.57594	-2.57268
WBGene00022554	-2.57415	-1.87089
WBGene00016641	-2.57137	-2.42506
WBGene00013618	-2.562	-1.58217
WBGene00235370	-2.55848	-2.17101
WBGene00050936	-2.55575	-3.04244
WBGene00003654	-2.54615	-2.39767
WBGene00018770	-2.52237	-2.63298
WBGene00194884	-2.52145	-3.13344
WBGene00077646	-2.52087	-2.33306
WBGene00018456	-2.52029	-2.09937
WBGene00021645	-2.51727	-2.07002
WBGene00236806	-2.51452	-2.25721
WBGene00013153	-2.51061	-2.05793
WBGene00014870	-2.507	-2.10053
WBGene00007419	-2.50334	-2.97625
WBGene00009020	-2.50309	-3.17827
WBGene00013158	-2.50299	-3.37724
WBGene00013617	-2.49436	-2.10405
WBGene00014041	-2.48248	-2.95125
WBGene00017069	-2.47954	-2.07772
WBGene00235277	-2.47738	-2.14074
WBGene00013501	-2.47483	-2.76191
WBGene00008937	-2.472	-2.38195
WBGene00219206	-2.47139	-2.39285
WBGene00050929	-2.47106	-2.05939
WBGene00219455	-2.45347	-2.24943
WBGene00044000	-2.44897	-2.76723
WBGene00021193	-2.44881	-2.26503
WBGene00019959	-2.44838	-2.06081
WBGene00016110	-2.44749	-2.31525
WBGene00194681	-2.447	-2.20269
WBGene00016585	-2.44155	-2.30043
WBGene00017423	-2.44044	-1.35475
WBGene00021893	-2.43955	-2.44396
WBGene00012786	-2.43643	-2.01239
WBGene00016319	-2.43465	-1.92981
WBGene00013233	-2.42689	-2.3888
WBGene00013698	-2.42488	-2.13227
WBGene00011365	-2.41778	-2.79882
WBGene00005147	-2.41538	-2.3021
WBGene00010204	-2.41169	-2.52651
WBGene00007126	-2.40894	-1.90707
WBGene00044768	-2.40366	-1.75463
WBGene00017629	-2.40134	-2.19602
WBGene00013638	-2.40104	-2.02878
WBGene00009730	-2.3871	-3.09388
WBGene00012967	-2.38577	-2.50425
WBGene00009380	-2.38189	-1.95112
WBGene00004377	-2.37641	-2.19093
WBGene00009310	-2.37314	-2.60624
WBGene00022298	-2.37014	-4.06324
WBGene00010921	-2.36333	-1.90249
WBGene00018455	-2.35977	-2.49928
WBGene00045052	-2.35921	-2.62828
WBGene00011531	-2.35775	-2.54918
WBGene00011129	-2.35378	-2.02346
WBGene00016885	-2.35046	-1.58376
WBGene00007771	-2.34857	-2.29439
WBGene00008622	-2.34422	-1.69898
WBGene00015518	-2.34363	-2.80296
WBGene00000636	-2.34314	-2.40805
WBGene00018671	-2.34132	-1.91527
WBGene00014871	-2.3409	-1.93526
WBGene00014904	-2.33942	-2.13866
WBGene00021653	-2.33847	-1.94932
WBGene00020797	-2.33277	-2.38774
WBGene00269383	-2.33247	-1.65885
WBGene00194913	-2.32753	-1.87899
WBGene00007213	-2.32482	-2.48719
WBGene00219748	-2.32399	-1.89923
WBGene00001244	-2.32384	-1.92751
WBGene00194725	-2.31762	-2.31959
WBGene00019611	-2.31707	-1.94809
WBGene00219553	-2.31674	-2.02883
WBGene00010726	-2.31422	-2.40813
WBGene00019938	-2.31008	-2.16679
WBGene00021726	-2.29971	-2.34682
WBGene00009696	-2.29629	-1.81699
WBGene00022067	-2.29578	-1.73471
WBGene00008568	-2.29377	-2.3115
WBGene00019420	-2.29052	-2.66749
WBGene00020778	-2.28984	-2.53722
WBGene00008930	-2.28582	-2.21903
WBGene00013500	-2.28412	-2.65083
WBGene00013510	-2.28381	-1.93174
WBGene00008819	-2.27091	-2.12092
WBGene00007717	-2.2707	-2.03645
WBGene00010043	-2.26957	-2.48245
WBGene00012290	-2.26223	-2.19453
WBGene00197009	-2.25826	-2.04808
WBGene00022354	-2.24945	-2.53479
WBGene00021271	-2.24786	-2.08168
WBGene00021885	-2.24664	-1.87706
WBGene00022485	-2.24611	-1.9823
WBGene00021469	-2.24182	-2.04292
WBGene00022275	-2.23086	-1.86446
WBGene00009437	-2.23061	-2.38062
WBGene00000857	-2.22872	-1.81245
WBGene00219766	-2.2259	-2.42624
WBGene00019266	-2.22254	-2.07918
WBGene00021264	-2.2219	-2.25922
WBGene00002222	-2.21796	-1.69036
WBGene00012461	-2.21205	-2.95392
WBGene00012953	-2.2103	-1.65425
WBGene00020912	-2.20932	-1.89645
WBGene00015601	-2.20169	-2.21274
WBGene00021966	-2.19978	-2.47171
WBGene00011626	-2.19974	-1.82736
WBGene00044705	-2.19687	-2.05491
WBGene00044220	-2.19439	-1.91755
WBGene00013100	-2.19346	-2.07263
WBGene00195070	-2.1921	-2.12315
WBGene00010066	-2.19155	-2.09159
WBGene00013755	-2.19054	-1.40982
WBGene00044728	-2.19029	-1.64047
WBGene00014121	-2.1861	-2.01738
WBGene00011803	-2.18389	-1.69995
WBGene00015371	-2.17808	-1.33594
WBGene00194650	-2.17788	-2.23014
WBGene00220078	-2.17134	-1.86588
WBGene00021884	-2.16816	-2.49961
WBGene00199724	-2.15958	-2.25248
WBGene00021977	-2.1589	-2.17844
WBGene00013249	-2.1522	-1.72435
WBGene00012405	-2.15183	-2.64822
WBGene00006925	-2.15018	-2.75801
WBGene00004148	-2.14941	-1.96731
WBGene00003607	-2.13698	-1.44545
WBGene00194836	-2.135	-1.88486
WBGene00220205	-2.13414	-1.84332
WBGene00018878	-2.1287	-1.97086
WBGene00013230	-2.12131	-2.13527
WBGene00008922	-2.11974	-1.75215
WBGene00020397	-2.1186	-2.53015
WBGene00013776	-2.11745	-2.24354
WBGene00015386	-2.11128	-2.40077
WBGene00021509	-2.11007	-2.28815
WBGene00008351	-2.10971	-2.04234
WBGene00050946	-2.10707	-1.28797
WBGene00013234	-2.10296	-2.10595
WBGene00018837	-2.1005	-1.44
WBGene00016880	-2.10043	-2.02545
WBGene00006926	-2.09696	-3.05704
WBGene00022691	-2.09607	-1.78064
WBGene00009644	-2.09355	-2.40006
WBGene00195023	-2.09085	-1.98701
WBGene00008384	-2.08864	-2.39321
WBGene00016029	-2.08727	-1.63105
WBGene00008782	-2.08722	-1.46078
WBGene00044436	-2.08418	-2.25656
WBGene00201019	-2.0831	-1.85382
WBGene00020630	-2.08085	-1.62614
WBGene00044637	-2.07986	-1.76346
WBGene00045468	-2.06648	-2.11857
WBGene00022030	-2.06352	-2.26113
WBGene00045053	-2.05834	-2.46951
WBGene00004321	-2.05828	-1.75174
WBGene00000775	-2.05635	-1.61822
WBGene00016631	-2.05603	-2.62322
WBGene00018075	-2.05481	-2.13963
WBGene00021244	-2.05045	-2.1294
WBGene00022951	-2.05002	-2.21693
WBGene00175029	-2.04638	-2.02689
WBGene00014105	-2.04619	-1.90606
WBGene00077772	-2.04141	-1.91258
WBGene00007354	-2.03625	-2.33399
WBGene00004120	-2.03602	-1.94491
WBGene00013615	-2.03002	-1.8051
WBGene00008051	-2.02432	-2.12143
WBGene00014858	-2.02089	-1.76035
WBGene00018634	-2.01433	-1.83704
WBGene00001145	-2.01262	-2.01882
WBGene00195022	-2.00399	-2.07724
WBGene00012831	-2.00108	-1.78867
WBGene00018193	-1.9974	-2.29118
WBGene00020952	-1.99693	-1.89097
WBGene00018304	-1.99301	-1.80314
WBGene00017729	-1.99294	-2.25487
WBGene00004745	-1.98846	-1.96768
WBGene00008090	-1.98753	-1.68603
WBGene00010779	-1.98477	-1.41272
WBGene00021614	-1.9824	-2.28561
WBGene00006353	-1.98153	-1.42738
WBGene00016703	-1.97447	-2.14592
WBGene00008536	-1.97099	-2.54795
WBGene00006843	-1.97071	-3.2933
WBGene00012615	-1.96912	-2.06113
WBGene00021319	-1.96342	-1.75099
WBGene00021654	-1.96311	-2.34194
WBGene00012898	-1.95412	-1.46954
WBGene00003600	-1.95291	-1.06147
WBGene00013859	-1.95288	-1.94232
WBGene00009161	-1.94849	-1.89991
WBGene00013620	-1.94232	-1.76335
WBGene00016072	-1.9415	-1.86341
WBGene00013321	-1.94094	-1.79526
WBGene00195024	-1.93772	-1.99764
WBGene00017571	-1.93772	-1.14991
WBGene00008929	-1.93568	-1.71591
WBGene00023451	-1.93544	-1.60544
WBGene00198215	-1.93429	-2.41383
WBGene00044038	-1.93297	-2.24875
WBGene00012755	-1.92908	-2.30069
WBGene00000207	-1.92741	-2.43704
WBGene00009453	-1.92367	-1.83418
WBGene00015796	-1.9219	-1.96677
WBGene00050935	-1.9217	-1.65315
WBGene00011497	-1.91578	-1.48332
WBGene00011757	-1.91515	-2.00655
WBGene00007899	-1.91498	-2.60023
WBGene00018690	-1.9149	-1.79415
WBGene00015647	-1.91105	-2.02602
WBGene00077558	-1.91079	-2.11164
WBGene00020753	-1.90932	-2.38027
WBGene00009846	-1.90581	-1.5737
WBGene00001583	-1.90172	-1.57798
WBGene00219758	-1.89705	-1.82077
WBGene00018965	-1.89534	-2.58641
WBGene00016985	-1.89517	-1.25964
WBGene00019517	-1.89472	-2.08668
WBGene00002977	-1.89255	-1.67962
WBGene00022435	-1.88439	-2.20488
WBGene00018807	-1.88392	-1.60275
WBGene00195034	-1.87478	-1.91386
WBGene00194667	-1.87271	-1.92823
WBGene00012124	-1.8722	-1.44968
WBGene00020930	-1.87052	-1.98386
WBGene00008226	-1.86384	-1.4619
WBGene00018767	-1.86376	-2.15983
WBGene00013574	-1.86372	-1.63013
WBGene00022274	-1.86152	-1.74862
WBGene00044606	-1.85215	-1.64901
WBGene00077761	-1.84982	-1.22868
WBGene00021345	-1.84913	-1.64671
WBGene00018608	-1.84807	-1.86731
WBGene00012194	-1.84759	-2.2114
WBGene00020254	-1.84258	-1.71383
WBGene00016558	-1.83538	-1.82337
WBGene00044639	-1.83485	-1.97764
WBGene00044499	-1.83151	-2.38765
WBGene00219749	-1.82977	-1.12684
WBGene00014021	-1.82848	-1.5813
WBGene00021246	-1.82775	-1.85434
WBGene00010619	-1.82372	-1.60813
WBGene00002181	-1.82237	-1.46491
WBGene00021019	-1.82217	-1.48804
WBGene00004352	-1.8196	-2.17358
WBGene00235163	-1.81843	-1.40493
WBGene00013195	-1.81822	-1.49678
WBGene00021531	-1.81591	-1.86986
WBGene00012158	-1.81221	-2.48696
WBGene00269378	-1.81086	-1.39903
WBGene00086555	-1.80675	-2.18278
WBGene00020373	-1.80586	-2.33384
WBGene00018578	-1.80477	-2.01848
WBGene00021402	-1.80114	-1.81918
WBGene00007920	-1.79996	-1.07213
WBGene00009572	-1.79933	-1.41854
WBGene00009043	-1.79576	-1.68721
WBGene00003638	-1.79571	-1.83402
WBGene00013632	-1.79153	-1.51634
WBGene00018647	-1.78465	-1.29164
WBGene00010177	-1.77849	-1.15365
WBGene00219707	-1.77826	-1.55523
WBGene00019197	-1.77154	-2.13073
WBGene00021675	-1.769	-2.08393
WBGene00044200	-1.7659	-1.56022
WBGene00045203	-1.76256	-1.38331
WBGene00012103	-1.75915	-1.08441
WBGene00014672	-1.75187	-1.41622
WBGene00021000	-1.75112	-1.54408
WBGene00016177	-1.75039	-1.86808
WBGene00195142	-1.75035	-1.83235
WBGene00016639	-1.74612	-1.40757
WBGene00011398	-1.74287	-1.69108
WBGene00021269	-1.73892	-1.87252
WBGene00019569	-1.73449	-2.04113
WBGene00008446	-1.73218	-1.77096
WBGene00013269	-1.7299	-1.89505
WBGene00044517	-1.72818	-1.55944
WBGene00008932	-1.72716	-1.46427
WBGene00018663	-1.7251	-1.70852
WBGene00008486	-1.7248	-1.68462
WBGene00015124	-1.7236	-1.63481
WBGene00014027	-1.72348	-1.77401
WBGene00011303	-1.72239	-1.81461
WBGene00219315	-1.72215	-1.98346
WBGene00022205	-1.72025	-1.75845
WBGene00044218	-1.70011	-1.47239
WBGene00045297	-1.69983	-1.21874
WBGene00045212	-1.69872	-1.55273
WBGene00000734	-1.69466	-2.21308
WBGene00011236	-1.69464	-1.61154
WBGene00013248	-1.69393	-1.34719
WBGene00017082	-1.6937	-1.91367
WBGene00013799	-1.68694	-1.4825
WBGene00014213	-1.68605	-1.18333
WBGene00021487	-1.68365	-1.50692
WBGene00013226	-1.6828	-1.36733
WBGene00196365	-1.68272	-1.73832
WBGene00017751	-1.67974	-1.37296
WBGene00010984	-1.67536	-1.94332
WBGene00022334	-1.6728	-1.07367
WBGene00002220	-1.67172	-1.36561
WBGene00011498	-1.6705	-1.56396
WBGene00018228	-1.6656	-2.24535
WBGene00194998	-1.66492	-1.34393
WBGene00008121	-1.65254	-1.92286
WBGene00020345	-1.6514	-1.2739
WBGene00006985	-1.64618	-1.51766
WBGene00018768	-1.64505	-2.13849
WBGene00000912	-1.64453	-1.46926
WBGene00017687	-1.6438	-1.49935
WBGene00010623	-1.64326	-1.72714
WBGene00022690	-1.63936	-1.56467
WBGene00220011	-1.63601	-1.23219
WBGene00003750	-1.62803	-1.71296
WBGene00015351	-1.62658	-1.93723
WBGene00020401	-1.62011	-1.9482
WBGene00219699	-1.61951	-1.53894
WBGene00021375	-1.61816	-1.37271
WBGene00023497	-1.61574	-1.47824
WBGene00013244	-1.60907	-1.79044
WBGene00249813	-1.60674	-1.54307
WBGene00020496	-1.60188	-1.34784
WBGene00000768	-1.59984	-2.21545
WBGene00012624	-1.59895	-1.27492
WBGene00007331	-1.59643	-1.58191
WBGene00021372	-1.59575	-1.71963
WBGene00219609	-1.59292	-1.9796
WBGene00045238	-1.58949	-1.27953
WBGene00019871	-1.58808	-1.52141
WBGene00003252	-1.58584	-1.82059
WBGene00021635	-1.5857	-1.70069
WBGene00019713	-1.58066	-1.21982
WBGene00011771	-1.57783	-1.54595
WBGene00016112	-1.57231	-1.79789
WBGene00013984	-1.56851	-1.48672
WBGene00008086	-1.56851	-1.35272
WBGene00020793	-1.56802	-1.61886
WBGene00022110	-1.56605	-1.46879
WBGene00016346	-1.56552	-1.41181
WBGene00007680	-1.56499	-1.61359
WBGene00003664	-1.56193	-1.85281
WBGene00019381	-1.55798	-1.69727
WBGene00012151	-1.55441	-1.76042
WBGene00009292	-1.55419	-2.11623
WBGene00219755	-1.55333	-1.63456
WBGene00195028	-1.55246	-1.58289
WBGene00194981	-1.54876	-1.36387
WBGene00015231	-1.54431	-1.60809
WBGene00011131	-1.5367	-1.43184
WBGene00016678	-1.536	-1.5083
WBGene00012922	-1.53114	-1.50283
WBGene00010003	-1.52962	-1.25956
WBGene00003786	-1.52599	-1.61839
WBGene00003075	-1.52505	-1.24419
WBGene00197474	-1.52485	-1.53355
WBGene00008863	-1.52081	-1.18763
WBGene00021687	-1.51841	-1.51864
WBGene00015569	-1.51741	-1.53996
WBGene00009018	-1.51533	-1.15335
WBGene00016487	-1.51497	-1.78041
WBGene00002264	-1.51013	-1.09177
WBGene00014186	-1.5095	-1.96894
WBGene00014112	-1.50777	-1.86321
WBGene00015158	-1.50512	-1.01861
WBGene00010868	-1.502	-1.31606
WBGene00195071	-1.49893	-1.21652
WBGene00012792	-1.4977	-1.9554
WBGene00022270	-1.49609	-1.46105
WBGene00023314	-1.49262	-1.39212
WBGene00220130	-1.49124	-1.15239
WBGene00019282	-1.4883	-1.89225
WBGene00001520	-1.48689	-1.27405
WBGene00018803	-1.48626	-1.2075
WBGene00020669	-1.47479	-1.53264
WBGene00019511	-1.4725	-1.24641
WBGene00014663	-1.47071	-1.67882
WBGene00000735	-1.47	-1.90103
WBGene00014082	-1.46835	-1.60045
WBGene00023399	-1.46731	-1.07556
WBGene00010783	-1.46712	-1.59994
WBGene00045077	-1.46511	-1.34362
WBGene00003970	-1.46489	-1.44077
WBGene00022726	-1.46028	-1.36791
WBGene00022177	-1.45791	-1.29478
WBGene00219241	-1.45628	-1.62745
WBGene00016520	-1.44923	-1.5678
WBGene00014801	-1.44712	-1.58219
WBGene00020212	-1.4446	-1.31137
WBGene00020817	-1.44177	-1.84255
WBGene00015504	-1.44053	-1.39064
WBGene00010811	-1.4342	-1.30406
WBGene00012569	-1.43156	-1.37595
WBGene00021417	-1.42821	-1.12893
WBGene00020457	-1.42371	-1.13215
WBGene00018390	-1.41426	-1.50024
WBGene00004245	-1.41401	-1.35233
WBGene00220238	-1.41382	-1.12035
WBGene00012908	-1.40254	-1.54976
WBGene00013535	-1.40042	-1.3349
WBGene00022544	-1.39558	-1.44441
WBGene00219751	-1.39462	-1.64588
WBGene00219756	-1.39303	-1.70037
WBGene00004056	-1.38869	-1.63469
WBGene00006575	-1.38707	-1.60559
WBGene00045150	-1.38664	-1.22142
WBGene00017507	-1.37959	-1.16266
WBGene00017627	-1.37829	-1.06824
WBGene00021428	-1.37676	-1.85343
WBGene00021415	-1.37331	-1.34801
WBGene00269431	-1.37158	-1.72353
WBGene00023138	-1.37042	-1.46155
WBGene00269384	-1.3693	-1.26909
WBGene00021968	-1.3692	-1.6529
WBGene00016823	-1.36725	-1.95072
WBGene00006769	-1.36593	-1.78321
WBGene00011267	-1.36307	-1.04944
WBGene00013603	-1.36168	-1.1315
WBGene00010362	-1.36077	-1.44168
WBGene00021464	-1.3582	-1.09523
WBGene00023036	-1.35593	-1.16397
WBGene00022198	-1.3559	-1.24363
WBGene00195027	-1.35521	-1.40314
WBGene00018856	-1.35435	-1.42827
WBGene00044261	-1.35149	-1.82194
WBGene00022026	-1.34814	-1.66745
WBGene00014292	-1.34784	-1.15855
WBGene00013236	-1.34747	-1.51993
WBGene00010407	-1.34604	-1.53169
WBGene00014166	-1.34011	-1.02487
WBGene00010364	-1.33907	-1.10297
WBGene00016931	-1.33751	-1.70019
WBGene00021664	-1.33595	-1.5803
WBGene00021369	-1.33542	-1.30627
WBGene00019598	-1.33245	-1.14008
WBGene00000112	-1.32869	-1.28794
WBGene00010734	-1.32608	-1.3428
WBGene00017344	-1.32492	-1.4761
WBGene00014344	-1.32265	-1.24431
WBGene00004057	-1.31978	-1.21905
WBGene00077552	-1.31516	-1.78701
WBGene00012890	-1.3101	-1.15563
WBGene00018773	-1.30784	-1.54721
WBGene00021702	-1.30692	-1.80907
WBGene00016076	-1.30634	-1.65898
WBGene00023008	-1.30197	-1.36299
WBGene00000462	-1.30085	-1.743
WBGene00194680	-1.29836	-1.19629
WBGene00014337	-1.29561	-1.30942
WBGene00013917	-1.29455	-1.00166
WBGene00018337	-1.29092	-1.13505
WBGene00194675	-1.28953	-1.42682
WBGene00022511	-1.28743	-1.37341
WBGene00007099	-1.28232	-1.36418
WBGene00017533	-1.28012	-1.12462
WBGene00015200	-1.2786	-1.69012
WBGene00198544	-1.27776	-1.32336
WBGene00001736	-1.27705	-1.26465
WBGene00021607	-1.27459	-1.17768
WBGene00019200	-1.27308	-1.46118
WBGene00001909	-1.27192	-1.11221
WBGene00018862	-1.27176	-1.35502
WBGene00013348	-1.27144	-1.23718
WBGene00014330	-1.26469	-1.29215
WBGene00019955	-1.26271	-1.89003
WBGene00023140	-1.26114	-1.40006
WBGene00004089	-1.2525	-1.04466
WBGene00010305	-1.25074	-1.037
WBGene00007702	-1.24851	-1.88014
WBGene00020313	-1.24838	-1.35956
WBGene00018199	-1.24669	-1.30383
WBGene00016485	-1.24631	-1.28005
WBGene00020527	-1.24614	-1.27242
WBGene00004423	-1.23811	-1.60076
WBGene00008996	-1.23355	-1.23962
WBGene00022988	-1.23081	-1.42407
WBGene00022936	-1.23039	-1.28373
WBGene00201932	-1.23039	-1.28373
WBGene00014536	-1.22764	-1.21641
WBGene00018204	-1.22137	-1.75337
WBGene00194812	-1.22018	-1.17169
WBGene00022937	-1.21648	-1.33847
WBGene00003414	-1.21563	-1.40939
WBGene00219728	-1.21439	-1.71067
WBGene00021387	-1.21351	-1.04415
WBGene00014643	-1.21193	-1.07431
WBGene00017767	-1.21076	-1.166
WBGene00007124	-1.20936	-1.44485
WBGene00008447	-1.20576	-2.00852
WBGene00044281	-1.2022	-1.12198
WBGene00014345	-1.20108	-1.19546
WBGene00021027	-1.19977	-1.35844
WBGene00014561	-1.19632	-1.36294
WBGene00010477	-1.1959	-1.06045
WBGene00200112	-1.19069	-1.24353
WBGene00019327	-1.19038	-1.03624
WBGene00007924	-1.18851	-1.0496
WBGene00004198	-1.18839	-1.25636
WBGene00013999	-1.18819	-1.10352
WBGene00004849	-1.18519	-1.2823
WBGene00009544	-1.18229	-2.01687
WBGene00195568	-1.18012	-1.41172
WBGene00000460	-1.17813	-1.41344
WBGene00021015	-1.17812	-1.15731
WBGene00014598	-1.17616	-1.27693
WBGene00014188	-1.17594	-1.52885
WBGene00000393	-1.17235	-1.52771
WBGene00013409	-1.17219	-1.27345
WBGene00200652	-1.16988	-1.3411
WBGene00014327	-1.16392	-1.46023
WBGene00000803	-1.16376	-1.04168
WBGene00000536	-1.16342	-1.00311
WBGene00001493	-1.16248	-1.24325
WBGene00001941	-1.15914	-1.29617
WBGene00014987	-1.15737	-1.33945
WBGene00013440	-1.15725	-1.33403
WBGene00219725	-1.15377	-1.36913
WBGene00004313	-1.14945	-1.24519
WBGene00014182	-1.14701	-1.27451
WBGene00022366	-1.14157	-1.30049
WBGene00015236	-1.14029	-1.01624
WBGene00017160	-1.13446	-1.38702
WBGene00196907	-1.13425	-1.09322
WBGene00021237	-1.13369	-1.28682
WBGene00019535	-1.1326	-1.168
WBGene00007892	-1.1307	-1.65113
WBGene00023032	-1.12736	-1.42014
WBGene00013165	-1.12169	-1.12465
WBGene00006738	-1.11977	-1.29112
WBGene00020100	-1.11754	-1.02604
WBGene00219451	-1.10883	-1.0231
WBGene00005222	-1.10734	-1.28178
WBGene00021941	-1.10668	-1.08049
WBGene00016131	-1.10486	-1.17285
WBGene00002071	-1.0958	-1.55445
WBGene00197737	-1.09549	-1.3953
WBGene00017890	-1.09541	-1.05687
WBGene00020729	-1.09428	-1.03364
WBGene00003153	-1.0922	-1.16972
WBGene00007133	-1.09119	-1.15673
WBGene00019491	-1.09039	-1.12857
WBGene00016061	-1.08735	-1.33752
WBGene00008420	-1.08562	-1.09994
WBGene00014411	-1.08215	-1.15295
WBGene00010722	-1.08118	-2.20187
WBGene00017070	-1.08059	-1.09645
WBGene00022178	-1.07427	-1.64036
WBGene00022899	-1.07126	-1.73139
WBGene00185118	-1.06976	-1.18923
WBGene00199628	-1.06564	-1.28594
WBGene00016561	-1.06452	-1.41891
WBGene00199886	-1.06309	-1.22354
WBGene00023491	-1.05715	-1.2737
WBGene00220222	-1.05638	-1.05938
WBGene00006344	-1.05433	-1.49507
WBGene00012498	-1.05296	-1.24735
WBGene00022952	-1.05153	-1.77233
WBGene00206380	-1.04778	-1.72264
WBGene00011346	-1.04441	-1.67665
WBGene00206389	-1.0441	-1.59821
WBGene00017849	-1.04396	-1.09451
WBGene00001459	-1.04386	-1.01804
WBGene00022973	-1.04386	-1.21532
WBGene00006923	-1.04318	-1.11539
WBGene00023175	-1.0407	-1.71951
WBGene00012552	-1.03744	-1.11946
WBGene00017556	-1.03465	-1.42778
WBGene00014339	-1.03412	-1.72907
WBGene00022512	-1.03006	-1.07721
WBGene00023123	-1.02981	-1.77819
WBGene00200811	-1.02928	-1.6712
WBGene00023176	-1.02922	-1.65736
WBGene00198924	-1.02518	-1.46936
WBGene00198805	-1.02263	-1.69687
WBGene00003655	-1.01972	-1.27303
WBGene00200608	-1.01881	-1.64417
WBGene00012222	-1.01731	-1.22556
WBGene00185098	-1.01618	-1.08527
WBGene00019723	-1.01566	-1.09153
WBGene00200583	-1.01532	-1.71465
WBGene00199059	-1.01523	-1.27123
WBGene00199916	-1.01503	-1.76402
WBGene00044746	-1.01449	-1.45901
WBGene00219912	-1.01391	-1.03635
WBGene00022897	-1.01132	-1.69128
WBGene00022749	-1.00659	-1.10459
WBGene00023170	-1.00504	-1.26508
WBGene00023174	-1.00391	-1.67409
WBGene00012499	-1.00224	-1.08724
WBGene00000534	-1.00094	-1.0225

## Sheet: simr-1 25C gen2 up
Supplementary File 3, Sheet 7: Small RNAs significantly up-regulated 2 fold or greater in simr-1 mutant animals at 25ºC for two generations.
Gene name	log2FoldChange (relative to wt gen1)	log2FoldChange (relative to wt gen2)
WBGene00021986	6.48041	6.80264
WBGene00003385	5.4676	5.18818
WBGene00013587	5.16068	5.25979
WBGene00012867	5.08562	5.0679
WBGene00001935	4.82664	4.60207
WBGene00017153	4.82647	4.56307
WBGene00001791	4.69062	4.67231
WBGene00200004	4.68044	4.1853
WBGene00001890	4.66065	4.44784
WBGene00001899	4.52288	4.81975
WBGene00001893	4.49095	4.03713
WBGene00022815	4.46711	4.38235
WBGene00021020	4.42325	4.27639
WBGene00012673	4.40488	4.021
WBGene00006508	4.35255	4.80453
WBGene00001906	4.31573	3.98184
WBGene00199162	4.27938	3.93367
WBGene00001927	4.13755	3.88043
WBGene00001881	4.11724	3.80232
WBGene00010768	4.09552	3.7765
WBGene00001895	4.09542	4.28962
WBGene00001925	4.0742	3.66619
WBGene00001916	4.04865	3.81232
WBGene00001887	3.92381	4.00208
WBGene00019997	3.92261	3.56443
WBGene00001883	3.90484	4.30009
WBGene00019096	3.89891	3.56067
WBGene00001886	3.77634	3.80377
WBGene00002048	3.76436	3.81773
WBGene00019094	3.72798	3.23545
WBGene00001888	3.70661	3.44846
WBGene00017101	3.67044	3.67526
WBGene00001917	3.58482	4.07291
WBGene00001900	3.57504	3.47552
WBGene00001884	3.47565	3.41278
WBGene00021340	3.44634	3.13863
WBGene00017818	3.35588	3.50613
WBGene00000232	3.31359	3.00268
WBGene00014259	3.30515	3.17801
WBGene00011805	3.29498	3.43425
WBGene00001907	3.28966	3.36068
WBGene00018330	3.217	2.21179
WBGene00001904	3.12372	3.50246
WBGene00016763	3.09174	3.32577
WBGene00018720	3.01465	2.63976
WBGene00018842	3.00338	2.96943
WBGene00194682	2.99715	3.44506
WBGene00016492	2.98474	2.89146
WBGene00001877	2.93831	2.61848
WBGene00012237	2.86079	3.31062
WBGene00020183	2.7578	2.60755
WBGene00014459	2.73141	2.28486
WBGene00010295	2.7285	2.78396
WBGene00001119	2.64703	2.14309
WBGene00008779	2.64568	2.4791
WBGene00016540	2.64397	2.23695
WBGene00001942	2.63348	2.5509
WBGene00013358	2.62105	2.44867
WBGene00016953	2.52075	1.88431
WBGene00001921	2.48472	2.16385
WBGene00014471	2.45172	1.47729
WBGene00019588	2.41872	3.39451
WBGene00004747	2.4145	2.56178
WBGene00001931	2.40531	2.05606
WBGene00021808	2.39769	2.62248
WBGene00001880	2.39167	1.90658
WBGene00018196	2.38533	1.94463
WBGene00000057	2.35054	1.94416
WBGene00011812	2.33299	2.08187
WBGene00006819	2.32854	2.02696
WBGene00006771	2.30847	1.9777
WBGene00007281	2.2988	2.38253
WBGene00001939	2.27762	2.33242
WBGene00015488	2.24276	1.67503
WBGene00014450	2.22451	1.47782
WBGene00015230	2.15557	1.90608
WBGene00010294	2.05617	2.10294
WBGene00003040	2.04856	2.14102
WBGene00007752	1.99414	2.08766
WBGene00014461	1.90484	1.31844
WBGene00011291	1.90196	1.74153
WBGene00000224	1.87556	1.48358
WBGene00017796	1.86396	2.00273
WBGene00021107	1.81586	1.93803
WBGene00003235	1.79983	1.42798
WBGene00019994	1.76275	1.18142
WBGene00017186	1.75882	1.96158
WBGene00001937	1.73033	1.39769
WBGene00000237	1.72904	2.22114
WBGene00015344	1.70077	1.49481
WBGene00001919	1.68409	1.33148
WBGene00004357	1.65545	1.89461
WBGene00012423	1.65081	1.8606
WBGene00013419	1.61302	1.83921
WBGene00003068	1.60512	1.44192
WBGene00014456	1.59212	1.30132
WBGene00013531	1.58151	1.67061
WBGene00044177	1.56446	1.51691
WBGene00001032	1.54572	1.64224
WBGene00009370	1.5405	1.31444
WBGene00013835	1.52831	1.28653
WBGene00010293	1.48395	1.40477
WBGene00022165	1.47393	1.31178
WBGene00021357	1.45015	1.3828
WBGene00015229	1.43884	1.6134
WBGene00003941	1.43317	1.45568
WBGene00044894	1.4208	1.59955
WBGene00006062	1.41077	1.2067
WBGene00014466	1.40775	1.10588
WBGene00017080	1.392	1.58378
WBGene00001929	1.37211	1.06184
WBGene00021088	1.3681	1.17714
WBGene00007385	1.34784	1.11219
WBGene00003947	1.34291	1.36543
WBGene00014117	1.33975	1.16789
WBGene00022127	1.33442	1.06614
WBGene00004915	1.30826	1.15898
WBGene00015248	1.3042	1.18939
WBGene00009646	1.29982	1.62236
WBGene00018099	1.29967	1.17425
WBGene00014452	1.29659	1.04093
WBGene00007986	1.29341	1.31101
WBGene00018491	1.29047	1.12965
WBGene00003948	1.28813	1.15514
WBGene00012643	1.27937	1.28265
WBGene00012758	1.26859	1.42658
WBGene00021351	1.25268	1.0076
WBGene00003130	1.24787	1.1941
WBGene00014955	1.24617	1.77288
WBGene00015478	1.23954	1.72737
WBGene00002196	1.23619	1.14131
WBGene00015765	1.23402	1.11089
WBGene00012564	1.23251	1.57672
WBGene00004504	1.23003	1.16605
WBGene00022589	1.22989	1.04769
WBGene00002025	1.22478	1.08096
WBGene00012344	1.21484	1.32001
WBGene00004421	1.20048	1.15435
WBGene00015994	1.18967	1.21311
WBGene00004502	1.18792	1.29366
WBGene00003951	1.18686	1.26115
WBGene00012148	1.18421	1.35099
WBGene00019983	1.176	1.06364
WBGene00009122	1.17527	1.01285
WBGene00021239	1.17308	1.14471
WBGene00011063	1.16967	1.26443
WBGene00011735	1.16842	1.23281
WBGene00008506	1.15859	1.17016
WBGene00003928	1.15612	1.01807
WBGene00021466	1.14011	1.20562
WBGene00001940	1.13976	1.20806
WBGene00219822	1.13879	1.07182
WBGene00021562	1.13848	1.13886
WBGene00018586	1.13681	1.01593
WBGene00004467	1.13311	1.22647
WBGene00004466	1.12354	1.09482
WBGene00004477	1.12157	1.32378
WBGene00013168	1.11307	1.13215
WBGene00012964	1.11278	1.06247
WBGene00022166	1.105	1.12332
WBGene00012738	1.10384	1.09696
WBGene00013345	1.1015	1.01516
WBGene00017984	1.09647	1.21625
WBGene00003953	1.09246	1.15151
WBGene00001131	1.08497	1.07076
WBGene00003955	1.08221	1.0629
WBGene00013150	1.08162	1.15483
WBGene00004914	1.0803	1.03649
WBGene00003922	1.07962	1.0026
WBGene00001922	1.07913	1.13245
WBGene00021985	1.07615	1.12045
WBGene00021097	1.07272	1.20862
WBGene00003926	1.07119	1.23041
WBGene00004930	1.06988	1.12505
WBGene00002182	1.06679	1.21711
WBGene00021849	1.05622	1.1106
WBGene00021401	1.05332	1.16695
WBGene00001683	1.0529	1.27377
WBGene00005022	1.04794	1.17669
WBGene00006619	1.04615	1.19025
WBGene00013200	1.04607	1.38141
WBGene00004501	1.04197	1.01362
WBGene00003924	1.0375	1.03557
WBGene00004503	1.03687	1.00296
WBGene00012645	1.03624	1.13088
WBGene00001946	1.03302	1.14757
WBGene00006924	1.02796	1.03102
WBGene00004338	1.02299	1.41069
WBGene00013231	1.02295	1.35396
WBGene00017928	1.02102	1.14412
WBGene00010844	1.0192	1.0236
WBGene00002045	1.01373	1.0124
WBGene00010303	1.00489	1.15726
WBGene00012674	1.00194	1.17708

## Sheet: simr-1 25C gen7 down
Supplementary File 3, Sheet 8: Small RNAs significantly down-regulated 2 fold or greater in simr-1 mutant animals at 25ºC for seven generations.
Gene name	log2FoldChange (relative to wt gen1)	log2FoldChange (relative to wt gen7)
WBGene00021927	-8.39157	-7.55364
WBGene00022438	-8.34212	-8.39502
WBGene00021301	-8.06507	-6.2254
WBGene00017106	-7.91017	-7.16177
WBGene00012572	-7.87351	-7.08092
WBGene00001705	-7.67374	-5.00643
WBGene00007600	-7.39849	-7.6909
WBGene00008890	-7.35606	-7.38736
WBGene00019370	-7.26702	-5.7597
WBGene00017644	-6.95209	-6.3818
WBGene00021505	-6.89202	-6.35953
WBGene00007926	-6.78706	-5.72642
WBGene00008776	-6.7798	-5.72792
WBGene00013499	-6.51877	-6.41779
WBGene00010226	-6.51553	-6.28385
WBGene00001666	-6.46991	-6.1888
WBGene00000819	-6.45062	-4.03164
WBGene00015020	-6.4061	-5.45335
WBGene00012554	-6.38234	-6.12437
WBGene00017100	-6.37967	-5.52234
WBGene00001955	-6.37042	-5.93351
WBGene00019909	-6.35337	-4.56053
WBGene00022307	-6.34338	-3.62104
WBGene00017148	-6.33013	-6.20044
WBGene00012985	-6.17103	-4.78033
WBGene00019044	-6.12568	-5.61048
WBGene00003579	-6.11551	-6.19152
WBGene00021835	-5.9633	-5.08153
WBGene00001745	-5.96319	-5.53666
WBGene00043990	-5.93953	-5.4705
WBGene00002100	-5.93686	-5.92097
WBGene00007079	-5.92163	-5.41034
WBGene00004196	-5.91271	-5.81896
WBGene00022276	-5.86252	-7.27867
WBGene00007076	-5.84642	-5.12498
WBGene00005061	-5.8361	-6.03485
WBGene00022315	-5.82371	-4.30382
WBGene00017515	-5.81993	-5.16463
WBGene00013222	-5.81308	-3.7199
WBGene00043989	-5.76139	-5.06486
WBGene00009657	-5.74943	-5.51621
WBGene00012759	-5.74413	-6.89336
WBGene00021790	-5.74391	-5.23771
WBGene00016758	-5.74113	-4.78211
WBGene00019267	-5.72699	-6.1473
WBGene00021008	-5.68309	-5.53223
WBGene00012854	-5.6617	-4.08591
WBGene00021479	-5.65929	-6.07492
WBGene00016273	-5.65476	-5.63161
WBGene00012866	-5.6457	-6.19746
WBGene00017099	-5.6284	-5.0675
WBGene00013802	-5.62631	-5.59745
WBGene00011592	-5.62446	-5.30598
WBGene00007275	-5.59266	-5.43356
WBGene00269433	-5.57427	-5.38256
WBGene00012289	-5.56595	-6.04521
WBGene00018439	-5.54394	-4.23868
WBGene00002088	-5.54216	-5.88244
WBGene00044468	-5.52637	-4.04416
WBGene00004130	-5.51884	-3.56593
WBGene00021096	-5.51432	-5.42893
WBGene00019538	-5.48565	-6.17324
WBGene00017944	-5.4676	-4.74124
WBGene00045043	-5.44409	-5.58176
WBGene00007928	-5.43329	-5.15694
WBGene00206511	-5.42042	-4.96045
WBGene00016216	-5.41672	-5.30762
WBGene00206474	-5.40954	-5.34938
WBGene00019545	-5.4035	-5.4217
WBGene00009005	-5.35225	-5.58836
WBGene00015896	-5.25797	-4.8548
WBGene00023209	-5.25517	-4.43821
WBGene00013812	-5.23561	-5.35151
WBGene00020988	-5.2303	-4.79574
WBGene00022446	-5.21477	-4.51027
WBGene00017303	-5.20505	-4.8749
WBGene00013387	-5.1826	-4.79035
WBGene00003593	-5.18072	-2.8048
WBGene00011733	-5.16111	-4.95633
WBGene00007679	-5.12502	-5.13778
WBGene00018761	-5.123	-4.54161
WBGene00022441	-5.11462	-5.70081
WBGene00012486	-5.10663	-3.44665
WBGene00012671	-5.10066	-5.71003
WBGene00016871	-5.08344	-2.57646
WBGene00018383	-5.06524	-4.8107
WBGene00022358	-5.058	-5.52468
WBGene00021817	-5.04496	-4.81213
WBGene00019665	-5.00834	-5.35098
WBGene00219675	-4.99876	-5.44984
WBGene00219317	-4.98845	-4.15002
WBGene00003124	-4.98302	-4.80372
WBGene00021353	-4.97092	-5.09568
WBGene00016165	-4.97004	-5.09045
WBGene00195253	-4.96409	-3.20028
WBGene00195034	-4.92774	-2.38995
WBGene00007119	-4.92664	-4.25639
WBGene00044530	-4.90762	-5.2869
WBGene00009361	-4.8908	-2.43363
WBGene00012717	-4.88385	-5.22591
WBGene00007988	-4.87717	-4.64225
WBGene00012239	-4.85351	-4.3753
WBGene00044504	-4.81426	-4.42344
WBGene00009288	-4.79932	-5.02908
WBGene00013511	-4.78994	-2.66141
WBGene00013777	-4.75925	-3.70853
WBGene00007395	-4.73977	-4.73284
WBGene00017354	-4.73468	-5.15906
WBGene00008937	-4.72073	-4.19664
WBGene00044482	-4.70275	-5.26596
WBGene00003387	-4.70204	-5.18327
WBGene00012911	-4.70007	-4.45287
WBGene00002017	-4.69985	-5.22392
WBGene00006784	-4.67799	-4.92836
WBGene00015407	-4.67691	-4.51013
WBGene00007722	-4.67177	-5.04981
WBGene00016585	-4.67065	-4.12702
WBGene00021678	-4.65621	-4.20887
WBGene00006767	-4.65409	-4.16296
WBGene00013009	-4.64628	-3.18992
WBGene00014233	-4.63918	-4.73314
WBGene00014807	-4.62994	-3.17703
WBGene00014148	-4.62341	-3.36861
WBGene00269431	-4.62328	-2.94148
WBGene00009697	-4.62271	-4.73026
WBGene00004933	-4.62258	-4.90065
WBGene00010921	-4.60925	-3.09191
WBGene00044502	-4.60264	-5.65351
WBGene00021095	-4.59541	-4.56932
WBGene00009696	-4.58414	-3.39187
WBGene00219413	-4.57772	-4.84028
WBGene00002015	-4.56664	-5.06528
WBGene00044705	-4.56577	-4.19118
WBGene00011393	-4.55875	-4.49926
WBGene00021079	-4.5454	-3.72783
WBGene00014944	-4.53488	-3.2292
WBGene00021976	-4.47728	-4.90917
WBGene00007489	-4.46306	-3.74533
WBGene00022129	-4.45291	-5.30842
WBGene00013755	-4.44358	-2.53928
WBGene00045366	-4.44158	-2.61531
WBGene00015115	-4.43288	-5.12257
WBGene00013736	-4.4324	-4.35329
WBGene00013672	-4.42891	-4.39365
WBGene00002020	-4.42791	-4.65454
WBGene00021274	-4.39433	-4.46861
WBGene00019316	-4.39263	-3.69559
WBGene00004347	-4.38461	-4.78562
WBGene00014130	-4.37063	-4.65601
WBGene00013778	-4.3578	-3.94755
WBGene00022275	-4.35463	-3.38938
WBGene00022608	-4.34938	-4.4545
WBGene00197009	-4.33494	-3.86876
WBGene00012570	-4.3306	-4.00822
WBGene00014090	-4.32576	-2.93376
WBGene00013403	-4.31997	-4.33986
WBGene00018577	-4.31892	-2.14605
WBGene00018241	-4.31591	-4.29905
WBGene00009635	-4.31473	-4.1883
WBGene00019546	-4.30334	-3.71902
WBGene00006930	-4.30105	-2.59564
WBGene00004827	-4.28798	-4.60669
WBGene00001247	-4.28428	-4.19641
WBGene00011971	-4.26659	-3.93573
WBGene00020486	-4.24487	-3.35351
WBGene00219756	-4.23651	-2.25106
WBGene00045056	-4.23082	-3.63525
WBGene00045277	-4.22544	-3.48417
WBGene00018433	-4.22156	-4.30663
WBGene00002222	-4.20705	-3.2373
WBGene00003480	-4.18818	-4.87598
WBGene00194747	-4.18269	-4.9353
WBGene00009468	-4.17529	-4.18643
WBGene00043992	-4.17199	-3.85416
WBGene00008858	-4.16982	-4.04227
WBGene00007213	-4.15775	-3.15107
WBGene00219728	-4.1542	-2.3468
WBGene00021458	-4.14797	-4.19015
WBGene00001764	-4.14333	-4.68768
WBGene00016299	-4.13086	-4.75549
WBGene00009558	-4.12942	-4.31705
WBGene00017979	-4.12123	-2.94471
WBGene00007523	-4.11858	-2.64176
WBGene00008500	-4.11668	-3.74309
WBGene00011531	-4.11307	-4.18109
WBGene00002019	-4.09356	-4.53378
WBGene00021645	-4.08995	-3.65677
WBGene00013830	-4.08787	-2.14962
WBGene00021913	-4.08138	-4.14379
WBGene00022682	-4.07979	-3.92293
WBGene00196465	-4.06694	-4.09801
WBGene00201019	-4.06313	-4.44817
WBGene00235277	-4.05129	-3.51827
WBGene00014858	-4.04578	-3.20959
WBGene00020450	-4.03543	-3.42786
WBGene00014956	-4.0222	-2.65125
WBGene00010102	-4.02011	-1.82311
WBGene00012624	-4.01991	-3.21831
WBGene00044000	-4.01778	-3.66236
WBGene00010100	-4.00444	-1.84499
WBGene00009044	-4.00341	-3.52804
WBGene00044268	-3.98378	-4.6783
WBGene00021653	-3.98071	-3.75268
WBGene00201351	-3.98015	-4.05209
WBGene00015735	-3.97061	-1.69494
WBGene00018186	-3.96777	-3.61058
WBGene00206419	-3.9655	-5.01578
WBGene00012549	-3.96284	-4.79288
WBGene00006570	-3.95591	-3.49145
WBGene00019030	-3.95296	-4.19484
WBGene00013613	-3.94953	-3.18426
WBGene00009020	-3.9479	-4.29006
WBGene00012107	-3.94505	-3.77806
WBGene00044414	-3.94451	-4.55336
WBGene00010585	-3.94339	-2.3222
WBGene00020551	-3.94212	-4.14529
WBGene00008986	-3.93211	-4.08312
WBGene00007405	-3.91062	-2.01772
WBGene00021039	-3.9047	-4.25702
WBGene00008690	-3.89956	-3.98239
WBGene00021893	-3.89387	-4.15753
WBGene00013859	-3.8921	-4.03176
WBGene00009917	-3.89057	-3.73411
WBGene00219218	-3.889	-2.96095
WBGene00194913	-3.87757	-2.02142
WBGene00006926	-3.87556	-2.90727
WBGene00017737	-3.87333	-4.3189
WBGene00010449	-3.86535	-5.43965
WBGene00077772	-3.86418	-1.36003
WBGene00011809	-3.86394	-2.29856
WBGene00219206	-3.86351	-3.06951
WBGene00045387	-3.86116	-4.52252
WBGene00021148	-3.84914	-3.80145
WBGene00235163	-3.83438	-3.11694
WBGene00206532	-3.83091	-2.67291
WBGene00023284	-3.82694	-2.6751
WBGene00022497	-3.82153	-3.37628
WBGene00194681	-3.80815	-1.23534
WBGene00018309	-3.80791	-1.82105
WBGene00195023	-3.80123	-1.47579
WBGene00016641	-3.79745	-3.47564
WBGene00018456	-3.79664	-2.38483
WBGene00014105	-3.79555	-3.37673
WBGene00021547	-3.79249	-4.20496
WBGene00019899	-3.79073	-3.87501
WBGene00015153	-3.77546	-4.09223
WBGene00013692	-3.77406	-5.49319
WBGene00014920	-3.76569	-4.10476
WBGene00043534	-3.74988	-3.59917
WBGene00013233	-3.74609	-3.79422
WBGene00045212	-3.71513	-3.19752
WBGene00021726	-3.70383	-3.64925
WBGene00015868	-3.70306	-3.01109
WBGene00012699	-3.69456	-3.21228
WBGene00194956	-3.69126	-2.78668
WBGene00008351	-3.68541	-3.50273
WBGene00000056	-3.67775	-4.83015
WBGene00007941	-3.67413	-1.99343
WBGene00194650	-3.6626	-1.96966
WBGene00019420	-3.6571	-3.78305
WBGene00194896	-3.65351	-3.51179
WBGene00023404	-3.64267	-1.57702
WBGene00011575	-3.62032	-3.89676
WBGene00013638	-3.5986	-2.13331
WBGene00000554	-3.59447	-3.72172
WBGene00008714	-3.58632	-2.90397
WBGene00009437	-3.58441	-3.09016
WBGene00000857	-3.57854	-2.80916
WBGene00021966	-3.57449	-3.4016
WBGene00013563	-3.56507	-3.6991
WBGene00086555	-3.5624	-3.40454
WBGene00219755	-3.55014	-1.1465
WBGene00012290	-3.54994	-2.65592
WBGene00013501	-3.54946	-3.68796
WBGene00012096	-3.54885	-3.69042
WBGene00007672	-3.54714	-4.62514
WBGene00006927	-3.54015	-2.57452
WBGene00010242	-3.53345	-3.38287
WBGene00020451	-3.53292	-2.42469
WBGene00009889	-3.5301	-4.16676
WBGene00009310	-3.52712	-4.2514
WBGene00015111	-3.52176	-2.49508
WBGene00011365	-3.51691	-3.88504
WBGene00022274	-3.49892	-3.21204
WBGene00014041	-3.49623	-3.96762
WBGene00009142	-3.49317	-2.41666
WBGene00012103	-3.48948	-1.64509
WBGene00044436	-3.48626	-3.89196
WBGene00022485	-3.4633	-3.20453
WBGene00013429	-3.45914	-3.79461
WBGene00195028	-3.44711	-1.25525
WBGene00011829	-3.44221	-3.34776
WBGene00015887	-3.43959	-3.11828
WBGene00013500	-3.43029	-3.68253
WBGene00010587	-3.4286	-3.80581
WBGene00019170	-3.42434	-5.24454
WBGene00001638	-3.42148	-2.4873
WBGene00013230	-3.41923	-3.16622
WBGene00013195	-3.41643	-3.39679
WBGene00006928	-3.41641	-2.64331
WBGene00006929	-3.40901	-2.78561
WBGene00018204	-3.40807	-2.86818
WBGene00249813	-3.39727	-1.13147
WBGene00022225	-3.39415	-2.95088
WBGene00020753	-3.39315	-4.05604
WBGene00016319	-3.39303	-2.54047
WBGene00020730	-3.38435	-3.83575
WBGene00010371	-3.3716	-2.17514
WBGene00000518	-3.34717	-3.06859
WBGene00018228	-3.34317	-4.24634
WBGene00011200	-3.34234	-4.47637
WBGene00023451	-3.33165	-2.94925
WBGene00021469	-3.31005	-3.20774
WBGene00007165	-3.30777	-1.54071
WBGene00017533	-3.30323	-2.96935
WBGene00013234	-3.29967	-3.26205
WBGene00009081	-3.29781	-3.83288
WBGene00022334	-3.29429	-1.33332
WBGene00235340	-3.29181	-3.17307
WBGene00013826	-3.29026	-1.29954
WBGene00013816	-3.28659	-2.37895
WBGene00012124	-3.28653	-2.37989
WBGene00194667	-3.28578	-1.15033
WBGene00021886	-3.28573	-1.52322
WBGene00235300	-3.27862	-4.28024
WBGene00006962	-3.26613	-2.18756
WBGene00219687	-3.25301	-2.16687
WBGene00008353	-3.25084	-2.30379
WBGene00017453	-3.25012	-5.64688
WBGene00044200	-3.2404	-2.25908
WBGene00044045	-3.22427	-2.19471
WBGene00236806	-3.22144	-2.74926
WBGene00008447	-3.19987	-1.98021
WBGene00012786	-3.18342	-2.34139
WBGene00020952	-3.17944	-3.11153
WBGene00195027	-3.15676	-1.01971
WBGene00018304	-3.15354	-2.88506
WBGene00011850	-3.15137	-3.78068
WBGene00018671	-3.1409	-2.42296
WBGene00017729	-3.13578	-3.55879
WBGene00194725	-3.13547	-3.5418
WBGene00001523	-3.135	-2.78102
WBGene00019517	-3.13269	-3.68055
WBGene00022951	-3.12011	-2.84773
WBGene00019611	-3.11658	-2.00815
WBGene00020912	-3.11459	-2.79928
WBGene00008930	-3.09938	-2.92207
WBGene00021415	-3.09915	-2.95328
WBGene00013062	-3.09719	-2.41459
WBGene00008945	-3.08194	-3.0028
WBGene00013698	-3.07712	-2.36905
WBGene00009380	-3.07317	-2.53103
WBGene00000775	-3.06726	-1.72349
WBGene00000463	-3.0602	-3.70664
WBGene00219315	-3.05758	-3.02575
WBGene00017571	-3.0486	-1.48369
WBGene00195071	-3.04772	-2.11096
WBGene00008782	-3.04023	-2.25306
WBGene00016264	-3.03851	-3.83397
WBGene00015096	-3.02854	-4.32656
WBGene00050946	-3.02047	-1.09897
WBGene00008819	-3.01328	-2.84386
WBGene00009846	-3.01292	-2.54034
WBGene00219443	-3.00707	-1.60035
WBGene00013153	-3.00082	-2.70348
WBGene00219749	-2.98437	-1.45707
WBGene00016487	-2.97703	-2.72748
WBGene00017751	-2.96889	-2.05392
WBGene00012981	-2.96632	-4.12011
WBGene00014663	-2.96615	-3.4012
WBGene00021244	-2.96448	-3.71331
WBGene00196365	-2.95959	-2.89686
WBGene00220089	-2.95037	-4.47942
WBGene00020930	-2.94117	-3.11358
WBGene00018929	-2.93906	-2.27223
WBGene00022712	-2.93516	-3.1022
WBGene00077728	-2.93514	-4.22921
WBGene00043988	-2.93198	-2.26578
WBGene00009730	-2.92828	-2.83071
WBGene00018807	-2.92746	-2.43043
WBGene00002181	-2.91335	-1.78065
WBGene00195070	-2.91139	-2.70777
WBGene00020212	-2.91077	-2.34482
WBGene00007075	-2.90987	-2.31495
WBGene00010043	-2.90325	-3.10915
WBGene00017082	-2.89748	-2.61083
WBGene00021271	-2.89707	-3.13859
WBGene00044038	-2.89048	-2.88138
WBGene00020313	-2.88885	-2.85578
WBGene00011129	-2.88629	-1.91024
WBGene00045468	-2.8857	-2.70196
WBGene00020793	-2.87222	-2.37628
WBGene00018803	-2.86995	-2.05813
WBGene00022519	-2.86993	-3.28765
WBGene00000402	-2.867	-3.04195
WBGene00012792	-2.85924	-2.82734
WBGene00009453	-2.84858	-2.58136
WBGene00014207	-2.84804	-2.5912
WBGene00019569	-2.84791	-3.48761
WBGene00003654	-2.84577	-2.88643
WBGene00020373	-2.84532	-3.57602
WBGene00014907	-2.83618	-1.73416
WBGene00021668	-2.83337	-1.2982
WBGene00195142	-2.83246	-2.97671
WBGene00011803	-2.83065	-1.48305
WBGene00015601	-2.82883	-2.88566
WBGene00021531	-2.82583	-2.81257
WBGene00012970	-2.81698	-3.64855
WBGene00013666	-2.80934	-2.53644
WBGene00077761	-2.79603	-1.84381
WBGene00011497	-2.79425	-2.28439
WBGene00012967	-2.7907	-3.25026
WBGene00018223	-2.78828	-1.50235
WBGene00022349	-2.78121	-2.03965
WBGene00013244	-2.77504	-3.16099
WBGene00010066	-2.76752	-2.24447
WBGene00006750	-2.76722	-1.04724
WBGene00194884	-2.76461	-4.18063
WBGene00021193	-2.76344	-1.84718
WBGene00021264	-2.74797	-2.57329
WBGene00219758	-2.74603	-1.98847
WBGene00010779	-2.74546	-1.84038
WBGene00008226	-2.7363	-2.21461
WBGene00014904	-2.72924	-2.15505
WBGene00008932	-2.72675	-2.54968
WBGene00017630	-2.72573	-2.68724
WBGene00012909	-2.71693	-3.74252
WBGene00045297	-2.71201	-1.8879
WBGene00022039	-2.70444	-3.14881
WBGene00235158	-2.68762	-1.42584
WBGene00016558	-2.68748	-2.52931
WBGene00020778	-2.68173	-3.57773
WBGene00013321	-2.6799	-2.33115
WBGene00006925	-2.67904	-2.29444
WBGene00016029	-2.67681	-1.97542
WBGene00008622	-2.67639	-1.81004
WBGene00007309	-2.66933	-1.48876
WBGene00000636	-2.66737	-3.22591
WBGene00012238	-2.66549	-2.44662
WBGene00077646	-2.66483	-2.15459
WBGene00022726	-2.65862	-2.37119
WBGene00007899	-2.65668	-3.22018
WBGene00001244	-2.65119	-2.33978
WBGene00021987	-2.6374	-2.14342
WBGene00017725	-2.63549	-1.58881
WBGene00044606	-2.63502	-2.2452
WBGene00013352	-2.63344	-2.80235
WBGene00003075	-2.62935	-2.21421
WBGene00044639	-2.62752	-2.57285
WBGene00019159	-2.62489	-2.22257
WBGene00012898	-2.62405	-1.72606
WBGene00002977	-2.6158	-2.59622
WBGene00021607	-2.61486	-1.31526
WBGene00045053	-2.61035	-3.67694
WBGene00021487	-2.60603	-2.66393
WBGene00045077	-2.60547	-2.18981
WBGene00044637	-2.59971	-2.135
WBGene00015320	-2.59852	-2.38593
WBGene00020669	-2.59402	-2.68682
WBGene00009630	-2.59306	-2.11623
WBGene00009572	-2.59289	-1.84729
WBGene00008051	-2.58652	-2.60468
WBGene00012953	-2.5861	-1.13082
WBGene00011777	-2.58202	-3.11201
WBGene00269378	-2.58116	-1.5516
WBGene00045052	-2.57983	-3.23333
WBGene00022030	-2.57708	-2.94215
WBGene00020457	-2.56786	-1.95146
WBGene00013574	-2.56678	-2.30193
WBGene00003523	-2.56443	-1.79863
WBGene00044261	-2.56036	-3.58728
WBGene00021417	-2.53907	-1.99361
WBGene00219725	-2.52973	-3.06935
WBGene00015647	-2.52928	-3.30634
WBGene00018634	-2.52487	-1.96409
WBGene00007419	-2.52079	-3.48158
WBGene00014870	-2.51442	-1.89242
WBGene00016076	-2.50933	-2.57988
WBGene00021614	-2.50802	-2.77007
WBGene00018933	-2.50138	-2.08437
WBGene00018770	-2.49757	-3.01093
WBGene00007331	-2.49499	-2.81478
WBGene00014206	-2.493	-2.53244
WBGene00015124	-2.47778	-2.43837
WBGene00012461	-2.46754	-4.41333
WBGene00012745	-2.46341	-1.8085
WBGene00004321	-2.45817	-2.06176
WBGene00011757	-2.45703	-2.57292
WBGene00009043	-2.45641	-2.51515
WBGene00017942	-2.45142	-1.43115
WBGene00021971	-2.44482	-2.00803
WBGene00013535	-2.44342	-2.27119
WBGene00018851	-2.44196	-2.09105
WBGene00044218	-2.4397	-1.82874
WBGene00219295	-2.4326	-1.21074
WBGene00021968	-2.4257	-3.10953
WBGene00008086	-2.42154	-1.92318
WBGene00019266	-2.41851	-2.48493
WBGene00005147	-2.41717	-2.41931
WBGene00012755	-2.41646	-3.49093
WBGene00007717	-2.41523	-2.32584
WBGene00194678	-2.41408	-2.01101
WBGene00013776	-2.40538	-2.82517
WBGene00012151	-2.39433	-1.65867
WBGene00020797	-2.39054	-2.55369
WBGene00219553	-2.38291	-1.57618
WBGene00010868	-2.38201	-2.67544
WBGene00164974	-2.37983	-1.60904
WBGene00022177	-2.37489	-2.41403
WBGene00044220	-2.37325	-1.57533
WBGene00194675	-2.37179	-2.61386
WBGene00019959	-2.36987	-1.58786
WBGene00007126	-2.3647	-1.97081
WBGene00235370	-2.35566	-1.73941
WBGene00017069	-2.3552	-1.98661
WBGene00219766	-2.35499	-2.79175
WBGene00018850	-2.35127	-1.78268
WBGene00013799	-2.35013	-2.51309
WBGene00012831	-2.34927	-2.18728
WBGene00008929	-2.34222	-2.0985
WBGene00013158	-2.33846	-4.31389
WBGene00007372	-2.33434	-1.70561
WBGene00017507	-2.32857	-1.72716
WBGene00013226	-2.32592	-1.59985
WBGene00045238	-2.31923	-2.14836
WBGene00012993	-2.31205	-2.25125
WBGene00016661	-2.30428	-1.09918
WBGene00022067	-2.29359	-1.3088
WBGene00050929	-2.28621	-1.49995
WBGene00017310	-2.286	-1.16726
WBGene00022131	-2.28447	-3.26922
WBGene00021402	-2.28057	-2.42221
WBGene00021654	-2.27796	-2.7595
WBGene00009644	-2.26746	-3.07644
WBGene00023314	-2.26531	-2.01779
WBGene00013615	-2.25404	-1.38796
WBGene00014021	-2.25054	-1.50974
WBGene00018804	-2.24513	-2.79394
WBGene00197474	-2.24203	-2.3763
WBGene00019511	-2.24141	-1.2019
WBGene00020401	-2.23875	-2.72526
WBGene00007771	-2.23796	-2.15673
WBGene00013100	-2.23733	-2.37843
WBGene00004056	-2.2337	-2.53943
WBGene00021372	-2.22357	-2.37062
WBGene00077558	-2.21839	-2.81344
WBGene00021188	-2.21699	-1.60535
WBGene00018647	-2.21532	-1.12222
WBGene00012827	-2.21227	-1.94995
WBGene00010690	-2.21188	-1.98336
WBGene00021055	-2.20867	-1.41616
WBGene00044517	-2.20767	-2.28182
WBGene00020256	-2.19906	-2.67176
WBGene00010934	-2.19722	-1.75095
WBGene00016072	-2.19382	-2.52153
WBGene00015231	-2.19238	-2.08143
WBGene00017930	-2.1895	-1.14529
WBGene00015518	-2.18406	-2.96966
WBGene00009741	-2.18235	-1.85176
WBGene00010712	-2.17007	-1.31179
WBGene00009247	-2.16613	-1.29304
WBGene00013620	-2.16237	-1.33292
WBGene00021027	-2.16097	-2.68896
WBGene00010204	-2.15688	-2.1464
WBGene00018224	-2.15466	-1.56817
WBGene00014871	-2.15164	-1.73113
WBGene00015492	-2.15129	-2.53575
WBGene00008536	-2.14213	-2.7248
WBGene00021656	-2.13879	-2.33525
WBGene00016703	-2.13199	-2.83759
WBGene00003750	-2.13023	-2.52729
WBGene00008568	-2.12895	-2.11499
WBGene00044281	-2.12893	-1.54463
WBGene00022377	-2.12581	-1.45283
WBGene00011626	-2.12464	-1.40082
WBGene00014914	-2.1225	-1.41735
WBGene00008949	-2.12048	-1.65491
WBGene00012492	-2.11637	-2.69248
WBGene00021542	-2.11316	-1.31476
WBGene00015247	-2.11205	-1.56796
WBGene00021885	-2.10139	-1.35574
WBGene00019200	-2.09803	-2.37616
WBGene00016639	-2.09654	-1.64188
WBGene00022690	-2.09637	-1.72629
WBGene00018965	-2.09296	-3.39062
WBGene00013409	-2.09285	-2.24123
WBGene00019327	-2.08551	-1.81713
WBGene00000535	-2.07915	-2.70186
WBGene00022354	-2.07763	-3.12548
WBGene00017627	-2.0711	-1.51432
WBGene00219609	-2.0707	-2.81244
WBGene00006985	-2.07033	-1.78685
WBGene00220258	-2.06649	-1.03355
WBGene00019131	-2.05201	-1.4216
WBGene00008446	-2.04741	-2.54462
WBGene00001583	-2.04318	-1.29125
WBGene00022270	-2.04116	-1.80682
WBGene00044495	-2.04106	-1.31375
WBGene00022512	-2.03984	-1.89764
WBGene00220130	-2.02924	-1.46738
WBGene00015796	-2.02765	-2.54437
WBGene00019816	-2.02611	-1.54975
WBGene00000393	-2.02409	-2.03881
WBGene00020397	-2.01951	-3.10877
WBGene00022691	-2.01948	-1.21238
WBGene00019814	-2.01409	-1.55491
WBGene00014672	-2.01386	-1.66461
WBGene00010453	-2.00859	-1.2696
WBGene00011433	-2.00819	-1.84135
WBGene00004352	-2.00414	-2.84424
WBGene00050936	-2.00061	-3.78612
WBGene00016931	-1.99487	-2.99817
WBGene00006594	-1.99487	-1.52701
WBGene00077636	-1.99372	-2.14632
WBGene00022110	-1.99314	-2.41066
WBGene00050935	-1.99253	-1.10415
WBGene00009544	-1.99	-2.88322
WBGene00015386	-1.98531	-2.38766
WBGene00004198	-1.98415	-2.1802
WBGene00003655	-1.9814	-2.21297
WBGene00017419	-1.97861	-1.47846
WBGene00013999	-1.97625	-2.07239
WBGene00009292	-1.97402	-2.92527
WBGene00013510	-1.96774	-1.16195
WBGene00016177	-1.96697	-2.25447
WBGene00014027	-1.96452	-2.47046
WBGene00021509	-1.96383	-2.33168
WBGene00001145	-1.94948	-1.12559
WBGene00015158	-1.94254	-1.68214
WBGene00022564	-1.93896	-1.22353
WBGene00011498	-1.93614	-1.94789
WBGene00010003	-1.93345	-1.50939
WBGene00194836	-1.9319	-1.86053
WBGene00012499	-1.9216	-1.25243
WBGene00044401	-1.92017	-1.49106
WBGene00021675	-1.9159	-2.6728
WBGene00017264	-1.91	-1.60687
WBGene00010989	-1.908	-2.00289
WBGene00044499	-1.9062	-3.05654
WBGene00010722	-1.90485	-4.6982
WBGene00021702	-1.90186	-2.81665
WBGene00021863	-1.89918	-1.32976
WBGene00006575	-1.89671	-1.88469
WBGene00200434	-1.89581	-1.23236
WBGene00017556	-1.89572	-2.24769
WBGene00017182	-1.89094	-1.63635
WBGene00012498	-1.88747	-1.28444
WBGene00011398	-1.88636	-2.19448
WBGene00001663	-1.88161	-1.98372
WBGene00000545	-1.88094	-1.12801
WBGene00019735	-1.87635	-2.62126
WBGene00009161	-1.87601	-2.55214
WBGene00199724	-1.87386	-2.27212
WBGene00018455	-1.86847	-2.43671
WBGene00010726	-1.86035	-2.18029
WBGene00014102	-1.84596	-1.80128
WBGene00007354	-1.84357	-2.60858
WBGene00220078	-1.84215	-1.43736
WBGene00015576	-1.83799	-1.33963
WBGene00021387	-1.83308	-1.72233
WBGene00010623	-1.83149	-2.47128
WBGene00020852	-1.82795	-1.95292
WBGene00007485	-1.81876	-2.18199
WBGene00007139	-1.81831	-1.3174
WBGene00015351	-1.81727	-2.62199
WBGene00013159	-1.81632	-1.48759
WBGene00021464	-1.81586	-1.35311
WBGene00001188	-1.81186	-1.61402
WBGene00008270	-1.80968	-1.24947
WBGene00220205	-1.80412	-1.4226
WBGene00004120	-1.80221	-2.03408
WBGene00009148	-1.79514	-1.54993
WBGene00023491	-1.79314	-2.12264
WBGene00004202	-1.78946	-1.55578
WBGene00014643	-1.78762	-1.73076
WBGene00001859	-1.7835	-1.40621
WBGene00018664	-1.78306	-1.64526
WBGene00022209	-1.78286	-1.01595
WBGene00009788	-1.77757	-2.09201
WBGene00022508	-1.77749	-2.19639
WBGene00001909	-1.77656	-2.23193
WBGene00015569	-1.76483	-1.69236
WBGene00000514	-1.76264	-1.46626
WBGene00012922	-1.7606	-1.87345
WBGene00009962	-1.75887	-1.58583
WBGene00010550	-1.75478	-1.58983
WBGene00021246	-1.75242	-2.34902
WBGene00016112	-1.75186	-2.43476
WBGene00020100	-1.7384	-1.41526
WBGene00018608	-1.73459	-1.06547
WBGene00011131	-1.73306	-1.83295
WBGene00021118	-1.72603	-3.34971
WBGene00015504	-1.72584	-3.11245
WBGene00044249	-1.72568	-1.18926
WBGene00004377	-1.72495	-1.58145
WBGene00013348	-1.72462	-1.61433
WBGene00003903	-1.72286	-1.59947
WBGene00022026	-1.72282	-2.27624
WBGene00003674	-1.72101	-1.33469
WBGene00021345	-1.72021	-1.47982
WBGene00004057	-1.71606	-1.46652
WBGene00011049	-1.71445	-1.74124
WBGene00013249	-1.71374	-1.25186
WBGene00219932	-1.70852	-1.01735
WBGene00012201	-1.70526	-1.50327
WBGene00019302	-1.6941	-1.27974
WBGene00017890	-1.68281	-1.65554
WBGene00011771	-1.67881	-1.24587
WBGene00016678	-1.67786	-1.94788
WBGene00003414	-1.67366	-1.55348
WBGene00021635	-1.67262	-2.29373
WBGene00019739	-1.67246	-2.23703
WBGene00017736	-1.67011	-3.13264
WBGene00013612	-1.66463	-1.09971
WBGene00010734	-1.6632	-1.77729
WBGene00006843	-1.65466	-3.87489
WBGene00019138	-1.65323	-1.26054
WBGene00016070	-1.65216	-1.8107
WBGene00023399	-1.65034	-1.02616
WBGene00006527	-1.64757	-1.01709
WBGene00008384	-1.6461	-2.44108
WBGene00012569	-1.64004	-1.73053
WBGene00008121	-1.63678	-2.86246
WBGene00022063	-1.62866	-1.4269
WBGene00015456	-1.61074	-1.15673
WBGene00019491	-1.60811	-1.84515
WBGene00021884	-1.60771	-2.73735
WBGene00010619	-1.60176	-1.9068
WBGene00010811	-1.59677	-1.38375
WBGene00006753	-1.5946	-1.61263
WBGene00019381	-1.59195	-2.30492
WBGene00020527	-1.59025	-1.44109
WBGene00002218	-1.58889	-1.97641
WBGene00020345	-1.58832	-1.51721
WBGene00018878	-1.58545	-1.32438
WBGene00013603	-1.58039	-1.72997
WBGene00020207	-1.56487	-1.0888
WBGene00018578	-1.56197	-2.09233
WBGene00007133	-1.55898	-1.73288
WBGene00185098	-1.55568	-1.79071
WBGene00007924	-1.55346	-1.54155
WBGene00016346	-1.55076	-1.29629
WBGene00003552	-1.55061	-1.16565
WBGene00012851	-1.54909	-1.97381
WBGene00044641	-1.54776	-1.4535
WBGene00012228	-1.54557	-1.0929
WBGene00018075	-1.54363	-1.50608
WBGene00022554	-1.54299	-1.1467
WBGene00018193	-1.54126	-1.48274
WBGene00012640	-1.53994	-1.29582
WBGene00018767	-1.53356	-2.28119
WBGene00019638	-1.52771	-1.30038
WBGene00021319	-1.52755	-1.27156
WBGene00018990	-1.52445	-1.22202
WBGene00012412	-1.52191	-2.07204
WBGene00014166	-1.52139	-1.52787
WBGene00019938	-1.51982	-1.28689
WBGene00003252	-1.51944	-2.22422
WBGene00015819	-1.5177	-1.02521
WBGene00012189	-1.51186	-1.3239
WBGene00020564	-1.51105	-1.75918
WBGene00000207	-1.50497	-2.7328
WBGene00000112	-1.50357	-2.0785
WBGene00004148	-1.49779	-1.0827
WBGene00043068	-1.49586	-1.58986
WBGene00014947	-1.4952	-1.11865
WBGene00008178	-1.49371	-1.47547
WBGene00022198	-1.48274	-1.35158
WBGene00002264	-1.47996	-1.77048
WBGene00020306	-1.4798	-1.91089
WBGene00014082	-1.4738	-1.96534
WBGene00000768	-1.46435	-3.35504
WBGene00013594	-1.45993	-2.14572
WBGene00023351	-1.45767	-1.26545
WBGene00022272	-1.45536	-1.0188
WBGene00018667	-1.4426	-1.42634
WBGene00021428	-1.43892	-2.04189
WBGene00017949	-1.41189	-1.4854
WBGene00007900	-1.40892	-1.6506
WBGene00019197	-1.40241	-2.41425
WBGene00021483	-1.40238	-2.23567
WBGene00009988	-1.39149	-1.36176
WBGene00018390	-1.38977	-1.87078
WBGene00021269	-1.3866	-2.85837
WBGene00001736	-1.38021	-1.78228
WBGene00219241	-1.37569	-2.12652
WBGene00018044	-1.37367	-1.15327
WBGene00194998	-1.36989	-1.4007
WBGene00017980	-1.36336	-2.46903
WBGene00011303	-1.3586	-1.93144
WBGene00018773	-1.35132	-1.97077
WBGene00017344	-1.34997	-2.32323
WBGene00016631	-1.34504	-2.5194
WBGene00019082	-1.34039	-1.6469
WBGene00000820	-1.33888	-1.32442
WBGene00012877	-1.33579	-1.79926
WBGene00012890	-1.3298	-1.63215
WBGene00012405	-1.32802	-2.33659
WBGene00003637	-1.32524	-1.31669
WBGene00021941	-1.32465	-1.12423
WBGene00014987	-1.30939	-1.93618
WBGene00022298	-1.30826	-3.74215
WBGene00020407	-1.30584	-2.49635
WBGene00016172	-1.30197	-1.72149
WBGene00007680	-1.30142	-1.38864
WBGene00013779	-1.30085	-1.03023
WBGene00019139	-1.29668	-1.37144
WBGene00019955	-1.29664	-2.59927
WBGene00022435	-1.29586	-2.10392
WBGene00022205	-1.29317	-1.51823
WBGene00022178	-1.28865	-2.53119
WBGene00004745	-1.28742	-1.21402
WBGene00021931	-1.28159	-1.40352
WBGene00013165	-1.27633	-1.64831
WBGene00008726	-1.27375	-1.07689
WBGene00003664	-1.26259	-1.8362
WBGene00009863	-1.25354	-1.07786
WBGene00008996	-1.25292	-1.3461
WBGene00021637	-1.2492	-1.30592
WBGene00009641	-1.24536	-1.90819
WBGene00045203	-1.24226	-1.12473
WBGene00012222	-1.23927	-1.6533
WBGene00013269	-1.23765	-1.8019
WBGene00185077	-1.23635	-1.43542
WBGene00013569	-1.23546	-1.25217
WBGene00006975	-1.23431	-1.00587
WBGene00249826	-1.22825	-1.01212
WBGene00019789	-1.22747	-1.34757
WBGene00194812	-1.22596	-1.51141
WBGene00269384	-1.21787	-1.32899
WBGene00006830	-1.21684	-1.70861
WBGene00003585	-1.21496	-1.08402
WBGene00018663	-1.20668	-1.01929
WBGene00018658	-1.20186	-1.59207
WBGene00019871	-1.20151	-1.27481
WBGene00011663	-1.1935	-1.0613
WBGene00001459	-1.18021	-1.25984
WBGene00021000	-1.17812	-1.5002
WBGene00019858	-1.17619	-1.37527
WBGene00020666	-1.17477	-1.47462
WBGene00219912	-1.1709	-1.34053
WBGene00003153	-1.16557	-1.53294
WBGene00000294	-1.16081	-1.06847
WBGene00010783	-1.15798	-2.13112
WBGene00006432	-1.15579	-1.44561
WBGene00003638	-1.14756	-1.52452
WBGene00001639	-1.13992	-1.13803
WBGene00000734	-1.1392	-2.37169
WBGene00003182	-1.13122	-1.89087
WBGene00012908	-1.13036	-2.06964
WBGene00014186	-1.13014	-1.45025
WBGene00012194	-1.12536	-2.41049
WBGene00007923	-1.12446	-1.13168
WBGene00044219	-1.11908	-1.09295
WBGene00206380	-1.11666	-1.60056
WBGene00015016	-1.11413	-1.09582
WBGene00019535	-1.1086	-1.80831
WBGene00001905	-1.10859	-1.15706
WBGene00008545	-1.10168	-1.23954
WBGene00013236	-1.09845	-1.92186
WBGene00044233	-1.09722	-1.48006
WBGene00022544	-1.09352	-1.43466
WBGene00022834	-1.08586	-1.20838
WBGene00022688	-1.08045	-1.00485
WBGene00018337	-1.07932	-1.31599
WBGene00044742	-1.07823	-1.15353
WBGene00001941	-1.07755	-2.00972
WBGene00013984	-1.07713	-2.05152
WBGene00008398	-1.07667	-1.83057
WBGene00007099	-1.07171	-1.59584
WBGene00021369	-1.0696	-1.23779
WBGene00007114	-1.05534	-1.34948
WBGene00009702	-1.05493	-1.11891
WBGene00022366	-1.05248	-1.79107
WBGene00007198	-1.04977	-1.61949
WBGene00235269	-1.04672	-1.01268
WBGene00018202	-1.04627	-1.11143
WBGene00017160	-1.04407	-1.90458
WBGene00012195	-1.04189	-1.25628
WBGene00010407	-1.03332	-2.3047
WBGene00001426	-1.03177	-1.49319
WBGene00000735	-1.0215	-2.34899
WBGene00195169	-1.01576	-1.60505
WBGene00021664	-1.01041	-1.8402
WBGene00007892	-1.00672	-2.76838

## Sheet: simr-1 25C gen7 up
Supplementary File 3, Sheet 9: Small RNAs significantly up-regulated 2 fold or greater in simr-1 mutant animals at 25ºC for seven generations.
Gene name	log2FoldChange (relative to wt gen1)	log2FoldChange (relative to wt gen7)
WBGene00021986	6.50545	5.79838
WBGene00013587	5.65084	4.89127
WBGene00003385	5.61206	4.48366
WBGene00012867	4.99729	4.4982
WBGene00022815	4.90651	5.0737
WBGene00001791	4.90012	4.24463
WBGene00001899	4.84685	4.82154
WBGene00017153	4.75747	3.97314
WBGene00021020	4.70099	4.05794
WBGene00001890	4.66862	3.79255
WBGene00001935	4.55933	3.34249
WBGene00001916	4.5222	3.94292
WBGene00001906	4.4379	3.70791
WBGene00012673	4.40975	2.96533
WBGene00200004	4.37317	3.63715
WBGene00006508	4.35272	4.89841
WBGene00001887	4.33367	4.27761
WBGene00019997	4.32549	3.50638
WBGene00010768	4.31063	2.75127
WBGene00001883	4.28071	4.06246
WBGene00001893	4.10406	2.53392
WBGene00019096	4.02887	2.34442
WBGene00001881	3.93073	2.63486
WBGene00199162	3.89847	3.90392
WBGene00019094	3.8783	2.13631
WBGene00018330	3.84008	1.70612
WBGene00001886	3.82429	3.10775
WBGene00001927	3.78103	2.84745
WBGene00001895	3.76411	2.61578
WBGene00001925	3.71208	2.42616
WBGene00001917	3.64581	3.35143
WBGene00021340	3.59881	2.95485
WBGene00014259	3.57165	2.88791
WBGene00011805	3.56229	3.91148
WBGene00001907	3.51379	2.43188
WBGene00001888	3.41723	2.50537
WBGene00017101	3.39953	3.36842
WBGene00001904	3.35166	2.28681
WBGene00001900	3.33863	2.41692
WBGene00018720	3.25499	2.37102
WBGene00001884	3.20487	2.45832
WBGene00001032	3.20012	2.68516
WBGene00017818	3.18733	2.91907
WBGene00013358	3.15501	2.73451
WBGene00001877	2.9705	2.08427
WBGene00016492	2.94406	2.23122
WBGene00020507	2.91948	1.90325
WBGene00001931	2.74773	1.75988
WBGene00015789	2.74314	2.32251
WBGene00016763	2.73886	3.83363
WBGene00001921	2.68486	1.8397
WBGene00000444	2.68434	1.46557
WBGene00002048	2.67533	2.36509
WBGene00001942	2.65394	1.47968
WBGene00194682	2.635	2.9143
WBGene00016953	2.61451	1.20404
WBGene00004357	2.54849	1.6684
WBGene00001119	2.51003	1.01186
WBGene00001939	2.47882	1.80969
WBGene00021808	2.46307	2.33757
WBGene00013419	2.45943	1.47268
WBGene00016540	2.44102	1.49651
WBGene00001880	2.43355	1.81854
WBGene00000232	2.40978	1.61348
WBGene00007752	2.406	2.0111
WBGene00011812	2.38452	1.5579
WBGene00004747	2.3817	2.17723
WBGene00001169	2.36514	1.61988
WBGene00001876	2.346	1.7157
WBGene00012423	2.30089	1.68146
WBGene00006771	2.29818	1.44629
WBGene00006819	2.28653	1.64559
WBGene00001937	2.27327	1.49876
WBGene00020183	2.23796	1.7177
WBGene00001919	2.21957	1.38441
WBGene00013345	2.19484	1.21048
WBGene00001929	2.15287	1.30927
WBGene00012237	2.13776	3.10453
WBGene00008779	2.12117	2.19278
WBGene00017080	2.04084	1.65129
WBGene00000057	2.03233	1.8856
WBGene00003040	1.97211	1.76467
WBGene00003776	1.92143	1.1908
WBGene00019588	1.91203	3.24823
WBGene00021107	1.88243	1.49113
WBGene00011291	1.86587	1.0872
WBGene00017186	1.82858	1.49514
WBGene00010295	1.81588	1.82961
WBGene00015334	1.78382	1.29754
WBGene00001933	1.68371	1.17389
WBGene00013531	1.58213	1.64078
WBGene00022693	1.54315	1.63271
WBGene00007281	1.51324	1.73336
WBGene00021194	1.41483	1.67378
WBGene00045055	1.3631	1.1055
WBGene00006472	1.35505	1.2332
WBGene00013835	1.34323	1.26933
WBGene00022692	1.33425	1.57681
WBGene00219822	1.32736	1.10332
WBGene00015229	1.28934	1.15247
WBGene00013154	1.28801	1.41039
WBGene00004054	1.27068	1.49678
WBGene00010294	1.21895	1.09754
WBGene00019189	1.21668	1.02003
WBGene00018020	1.21635	1.497
WBGene00019136	1.19865	1.55325
WBGene00021577	1.09616	1.61726
WBGene00013172	1.0865	1.55179
WBGene00017796	1.07517	1.40727
WBGene00000237	1.03215	1.86843

## Sheet: simr-1 25C gen10 down
Supplementary File 3, Sheet 10: Small RNAs significantly down-regulated 2 fold or greater in simr-1 mutant animals at 25ºC for 10 generations.
Gene name	log2FoldChange (relative to wt gen1)	log2FoldChange (relative to wt gen10)
WBGene00021301	-8.37958	-4.89075
WBGene00008890	-7.5883	-6.3459
WBGene00012124	-7.57202	-4.23821
WBGene00022275	-6.92309	-3.10178
WBGene00021505	-6.75464	-5.24399
WBGene00000819	-6.7138	-2.87803
WBGene00021927	-6.66989	-5.93826
WBGene00017644	-6.65186	-6.19747
WBGene00017106	-6.58922	-5.85659
WBGene00021008	-6.53333	-6.8198
WBGene00007119	-6.49759	-6.03889
WBGene00008776	-6.46362	-5.49228
WBGene00007926	-6.4438	-4.84765
WBGene00044468	-6.37172	-3.83301
WBGene00001955	-6.18948	-5.77963
WBGene00009696	-6.18297	-3.30796
WBGene00004196	-6.17437	-5.95217
WBGene00016585	-6.15686	-6.19229
WBGene00044504	-6.15174	-5.7412
WBGene00013666	-6.07691	-5.48711
WBGene00007079	-6.0506	-4.28943
WBGene00001745	-6.0309	-4.65214
WBGene00017515	-6.02641	-4.8799
WBGene00017100	-6.00933	-4.88824
WBGene00021790	-5.99766	-5.45794
WBGene00012624	-5.97499	-3.50525
WBGene00016758	-5.95687	-4.62272
WBGene00043989	-5.94349	-4.56551
WBGene00011733	-5.93574	-5.79687
WBGene00001666	-5.92485	-6.3127
WBGene00010226	-5.91339	-6.40929
WBGene00045043	-5.88125	-5.51583
WBGene00043990	-5.84215	-4.13596
WBGene00002100	-5.83614	-5.85407
WBGene00012671	-5.80903	-6.74297
WBGene00002088	-5.80546	-6.02472
WBGene00022438	-5.74895	-6.23305
WBGene00012854	-5.72832	-4.40489
WBGene00012554	-5.68786	-5.50891
WBGene00014105	-5.6789	-4.9435
WBGene00017099	-5.67871	-4.46088
WBGene00015020	-5.65351	-4.31842
WBGene00009657	-5.61762	-6.08001
WBGene00007600	-5.61201	-5.96692
WBGene00007928	-5.56394	-4.97744
WBGene00016216	-5.55909	-4.91936
WBGene00013802	-5.55327	-5.34855
WBGene00018383	-5.55241	-5.27043
WBGene00016871	-5.53674	-3.7828
WBGene00021415	-5.52889	-5.55699
WBGene00009468	-5.49571	-5.11882
WBGene00007076	-5.47274	-4.14849
WBGene00013387	-5.46691	-5.7313
WBGene00015896	-5.43592	-4.35104
WBGene00003579	-5.42375	-5.20824
WBGene00009288	-5.41585	-5.44704
WBGene00219675	-5.39661	-5.90095
WBGene00021976	-5.37889	-5.49565
WBGene00014148	-5.37383	-3.88472
WBGene00002222	-5.36787	-5.05208
WBGene00019327	-5.36222	-2.68609
WBGene00016273	-5.32424	-5.06636
WBGene00011531	-5.3241	-5.80075
WBGene00015407	-5.29829	-4.43263
WBGene00011592	-5.29367	-5.20154
WBGene00018850	-5.28897	-4.2285
WBGene00021479	-5.2406	-6.36065
WBGene00006570	-5.22363	-4.81983
WBGene00195071	-5.20213	-3.42815
WBGene00020988	-5.19505	-5.17288
WBGene00013672	-5.19422	-4.94175
WBGene00009361	-5.14256	-2.44781
WBGene00021913	-5.13979	-4.84515
WBGene00020486	-5.1006	-3.15235
WBGene00017303	-5.0991	-4.8967
WBGene00023284	-5.09272	-2.24099
WBGene00018761	-5.0653	-4.64056
WBGene00044530	-5.05948	-5.64952
WBGene00013233	-5.05208	-4.99392
WBGene00022608	-5.04973	-4.08815
WBGene00206511	-5.04298	-4.22297
WBGene00021678	-5.03177	-4.35197
WBGene00007395	-5.02831	-4.28268
WBGene00017944	-5.01957	-3.80048
WBGene00019545	-4.99344	-4.17427
WBGene00021095	-4.99184	-6.02585
WBGene00201019	-4.98638	-5.26219
WBGene00021817	-4.98241	-4.25761
WBGene00012717	-4.95833	-4.92182
WBGene00022358	-4.95191	-4.59476
WBGene00000857	-4.94966	-3.56662
WBGene00044705	-4.94539	-3.91619
WBGene00023209	-4.91887	-4.42634
WBGene00021653	-4.91868	-4.77727
WBGene00022446	-4.9179	-4.97404
WBGene00001247	-4.91736	-5.82576
WBGene00006784	-4.9168	-5.38081
WBGene00012866	-4.91163	-5.54063
WBGene00013230	-4.88804	-4.83844
WBGene00012759	-4.88604	-5.91879
WBGene00219317	-4.8719	-6.0288
WBGene00045212	-4.85891	-4.19769
WBGene00000463	-4.85517	-4.99827
WBGene00019267	-4.83861	-5.44964
WBGene00023451	-4.83675	-3.71918
WBGene00007372	-4.82728	-4.44869
WBGene00013499	-4.80846	-5.2286
WBGene00021096	-4.78252	-5.73683
WBGene00235163	-4.78073	-2.47199
WBGene00005061	-4.77716	-4.94088
WBGene00008500	-4.76839	-4.45294
WBGene00022682	-4.71937	-4.316
WBGene00235277	-4.71707	-3.55897
WBGene00206474	-4.70889	-5.1429
WBGene00007679	-4.70255	-4.58525
WBGene00022129	-4.69443	-5.96305
WBGene00013234	-4.69286	-4.6143
WBGene00022736	-4.68921	-2.4936
WBGene00044586	-4.68188	-2.84002
WBGene00014090	-4.67454	-4.19268
WBGene00013736	-4.65819	-4.38485
WBGene00044482	-4.65166	-5.70409
WBGene00197009	-4.64274	-4.45308
WBGene00008351	-4.64212	-4.48159
WBGene00021835	-4.64026	-5.69495
WBGene00219295	-4.63988	-2.8646
WBGene00014858	-4.61894	-3.50586
WBGene00022485	-4.61427	-4.8542
WBGene00007275	-4.60835	-4.1533
WBGene00019316	-4.60696	-2.92326
WBGene00000267	-4.59859	-3.83109
WBGene00014130	-4.58716	-5.09734
WBGene00007489	-4.58651	-2.48011
WBGene00017571	-4.58099	-4.23946
WBGene00007941	-4.57911	-1.04936
WBGene00194725	-4.57273	-4.97422
WBGene00007988	-4.56632	-4.69679
WBGene00014233	-4.55113	-5.0476
WBGene00008937	-4.54221	-4.46003
WBGene00002019	-4.54183	-5.42663
WBGene00007722	-4.53818	-5.90112
WBGene00017900	-4.53705	-4.43127
WBGene00021079	-4.53171	-3.09984
WBGene00019611	-4.52859	-1.45592
WBGene00043988	-4.52477	-3.35063
WBGene00016165	-4.52007	-5.09331
WBGene00044436	-4.51942	-4.67338
WBGene00018241	-4.51473	-3.49351
WBGene00008690	-4.50095	-4.52022
WBGene00021645	-4.4825	-4.38572
WBGene00009247	-4.47928	-2.62681
WBGene00003387	-4.47093	-5.01257
WBGene00018851	-4.46784	-3.4357
WBGene00010453	-4.46119	-2.07946
WBGene00012993	-4.4555	-4.87542
WBGene00021726	-4.43365	-4.46703
WBGene00007075	-4.42579	-3.29528
WBGene00004827	-4.42052	-4.51273
WBGene00194956	-4.40134	-2.60015
WBGene00013403	-4.39108	-4.90823
WBGene00001523	-4.38796	-4.56342
WBGene00020457	-4.37384	-3.08619
WBGene00018456	-4.37143	-3.59234
WBGene00003124	-4.36762	-5.36324
WBGene00044401	-4.36509	-2.57601
WBGene00015115	-4.36018	-5.59607
WBGene00044045	-4.3597	-4.11345
WBGene00017310	-4.35608	-3.55403
WBGene00007139	-4.35439	-3.26817
WBGene00043992	-4.34988	-3.88131
WBGene00043534	-4.34118	-4.34834
WBGene00004933	-4.31799	-5.56491
WBGene00008353	-4.3168	-3.53019
WBGene00009005	-4.31365	-5.09223
WBGene00011393	-4.31012	-4.04757
WBGene00021274	-4.30588	-5.0037
WBGene00045077	-4.30012	-3.89332
WBGene00012953	-4.29902	-2.08811
WBGene00019420	-4.28573	-3.18057
WBGene00015153	-4.27645	-3.85604
WBGene00021039	-4.27569	-4.62836
WBGene00001764	-4.27253	-3.8814
WBGene00021458	-4.26288	-4.54217
WBGene00014907	-4.25826	-2.52401
WBGene00002017	-4.24316	-5.33241
WBGene00045387	-4.24291	-5.25822
WBGene00012289	-4.24192	-4.83779
WBGene00017354	-4.24047	-5.36869
WBGene00009437	-4.23743	-3.87177
WBGene00044268	-4.23625	-4.83599
WBGene00008714	-4.23579	-3.42318
WBGene00018224	-4.23219	-2.05291
WBGene00013826	-4.23028	-1.2876
WBGene00019665	-4.22575	-4.56709
WBGene00020551	-4.22332	-5.07511
WBGene00008986	-4.21377	-3.92051
WBGene00017507	-4.21059	-1.78544
WBGene00022349	-4.19685	-3.88066
WBGene00002977	-4.19489	-4.19388
WBGene00003523	-4.18199	-3.664
WBGene00018186	-4.18004	-4.01916
WBGene00022274	-4.17977	-4.14633
WBGene00045277	-4.16377	-3.78648
WBGene00194896	-4.15852	-3.58456
WBGene00017148	-4.15352	-5.33012
WBGene00021417	-4.1399	-1.949
WBGene00009697	-4.13424	-3.85069
WBGene00022276	-4.13369	-6.21109
WBGene00012107	-4.13282	-4.10296
WBGene00009602	-4.12627	-2.12598
WBGene00044414	-4.10014	-4.84351
WBGene00013620	-4.09879	-2.81586
WBGene00002020	-4.09872	-4.8908
WBGene00016110	-4.09839	-3.68318
WBGene00016487	-4.07256	-2.83065
WBGene00012699	-4.065	-3.43301
WBGene00009020	-4.06441	-4.88036
WBGene00086555	-4.04588	-4.09267
WBGene00013352	-4.04366	-3.8648
WBGene00196365	-4.02645	-4.01221
WBGene00013500	-4.02503	-4.08817
WBGene00045297	-4.02055	-2.29557
WBGene00009558	-4.01823	-4.93724
WBGene00016299	-4.01301	-4.82283
WBGene00015124	-4.01274	-3.91154
WBGene00009572	-4.0121	-2.53505
WBGene00023404	-3.99436	-2.21133
WBGene00044606	-3.99361	-3.15654
WBGene00015601	-3.98695	-4.03822
WBGene00017533	-3.98319	-3.1688
WBGene00013195	-3.98095	-3.55103
WBGene00000554	-3.97269	-3.83603
WBGene00016641	-3.96716	-4.9403
WBGene00019538	-3.962	-4.64316
WBGene00009635	-3.95766	-3.62641
WBGene00000518	-3.9574	-3.58308
WBGene00021893	-3.95093	-4.91399
WBGene00000514	-3.94992	-2.50525
WBGene00009917	-3.94475	-4.04846
WBGene00044213	-3.92981	-3.01307
WBGene00021886	-3.9292	-1.19107
WBGene00006640	-3.92834	-3.859
WBGene00044435	-3.92591	-2.72649
WBGene00008945	-3.92321	-3.57503
WBGene00012792	-3.92244	-4.17756
WBGene00000775	-3.91943	-3.47855
WBGene00020669	-3.91919	-4.52238
WBGene00008858	-3.9151	-3.29871
WBGene00020212	-3.91018	-3.24112
WBGene00002015	-3.90951	-4.97679
WBGene00045056	-3.9059	-3.96205
WBGene00012239	-3.90253	-2.13273
WBGene00018433	-3.89894	-4.60113
WBGene00020753	-3.89694	-3.36567
WBGene00013535	-3.88306	-2.85894
WBGene00001638	-3.87786	-1.58986
WBGene00019569	-3.86958	-4.51703
WBGene00015887	-3.86614	-2.92655
WBGene00018647	-3.8643	-2.27203
WBGene00017979	-3.86275	-3.64459
WBGene00013501	-3.8603	-3.69929
WBGene00219315	-3.84843	-3.71872
WBGene00022519	-3.83768	-4.32688
WBGene00014663	-3.83428	-4.34887
WBGene00019517	-3.8312	-4.30729
WBGene00018803	-3.81431	-2.46795
WBGene00009044	-3.8128	-3.60251
WBGene00219413	-3.81165	-3.88563
WBGene00019899	-3.80773	-3.71622
WBGene00013615	-3.80665	-2.33333
WBGene00017729	-3.80218	-4.13372
WBGene00195142	-3.79939	-4.0771
WBGene00011712	-3.7883	-1.83559
WBGene00012549	-3.77943	-3.79855
WBGene00012786	-3.77915	-2.49383
WBGene00219399	-3.77027	-1.64425
WBGene00015247	-3.76352	-2.86862
WBGene00044637	-3.76041	-3.38357
WBGene00022377	-3.7415	-2.3936
WBGene00009142	-3.7409	-2.98811
WBGene00016070	-3.7254	-3.83862
WBGene00020912	-3.7184	-3.43536
WBGene00021971	-3.71648	-2.99084
WBGene00195070	-3.71572	-3.06564
WBGene00009846	-3.71224	-2.59785
WBGene00011829	-3.70722	-3.58031
WBGene00016076	-3.70657	-4.03746
WBGene00044220	-3.69836	-2.21309
WBGene00021353	-3.68952	-4.27369
WBGene00018807	-3.66933	-2.38182
WBGene00020313	-3.66794	-3.72522
WBGene00013698	-3.66533	-2.62242
WBGene00002248	-3.65864	-2.91798
WBGene00022063	-3.65074	-2.97017
WBGene00022334	-3.64749	-1.36724
WBGene00010242	-3.6474	-3.14892
WBGene00007672	-3.6435	-4.33741
WBGene00008932	-3.64204	-3.1795
WBGene00018228	-3.63672	-3.17665
WBGene00011365	-3.62647	-4.64454
WBGene00012911	-3.62135	-3.20389
WBGene00022441	-3.61841	-3.53161
WBGene00194678	-3.61375	-2.97603
WBGene00019266	-3.61334	-4.22214
WBGene00008051	-3.61023	-4.27765
WBGene00009380	-3.60679	-4.27849
WBGene00009310	-3.59511	-4.77129
WBGene00006962	-3.5889	-3.26693
WBGene00219206	-3.57474	-2.62741
WBGene00012745	-3.56623	-2.4987
WBGene00015111	-3.56161	-2.50824
WBGene00009730	-3.56113	-3.12629
WBGene00201351	-3.55672	-3.56692
WBGene00000056	-3.53948	-5.46508
WBGene00009453	-3.52559	-3.4015
WBGene00006750	-3.52302	-2.93699
WBGene00018671	-3.51463	-2.77109
WBGene00007213	-3.51456	-1.98862
WBGene00017737	-3.51118	-3.94283
WBGene00219725	-3.50829	-4.04297
WBGene00015320	-3.505	-2.84204
WBGene00020952	-3.50412	-3.02462
WBGene00021193	-3.50367	-1.57474
WBGene00008819	-3.48609	-4.02819
WBGene00010934	-3.48502	-2.11379
WBGene00022951	-3.4844	-4.33506
WBGene00021055	-3.48067	-1.33396
WBGene00017082	-3.47879	-3.48456
WBGene00012096	-3.47431	-4.03989
WBGene00206419	-3.4655	-5.20437
WBGene00014041	-3.4651	-4.68276
WBGene00021469	-3.46363	-2.98879
WBGene00021966	-3.46152	-4.05093
WBGene00016551	-3.45127	-1.53551
WBGene00001663	-3.44954	-4.01434
WBGene00016558	-3.44519	-3.04666
WBGene00003075	-3.44373	-3.34328
WBGene00001188	-3.43998	-3.15298
WBGene00022726	-3.43378	-3.188
WBGene00021487	-3.43362	-3.3456
WBGene00004321	-3.43346	-2.87969
WBGene00011850	-3.43126	-4.96171
WBGene00014121	-3.42246	-3.36336
WBGene00022712	-3.41825	-3.59047
WBGene00007309	-3.41669	-1.3887
WBGene00020730	-3.41661	-4.13892
WBGene00014920	-3.41532	-3.99051
WBGene00012967	-3.4111	-4.24976
WBGene00012290	-3.405	-2.25532
WBGene00007454	-3.39174	-2.26805
WBGene00013799	-3.36929	-2.00484
WBGene00021547	-3.36911	-4.37655
WBGene00017264	-3.36492	-2.64581
WBGene00003480	-3.3603	-4.94785
WBGene00004198	-3.35655	-3.70763
WBGene00013859	-3.35236	-4.39145
WBGene00018304	-3.34409	-3.62367
WBGene00013999	-3.34207	-2.99969
WBGene00012228	-3.34104	-1.85356
WBGene00021148	-3.33901	-3.30489
WBGene00021614	-3.33796	-4.57465
WBGene00021027	-3.31871	-3.73923
WBGene00196465	-3.31294	-3.38816
WBGene00013638	-3.30362	-1.32465
WBGene00022177	-3.29948	-2.78576
WBGene00021264	-3.29206	-3.629
WBGene00013429	-3.26092	-3.62481
WBGene00044249	-3.25863	-2.23742
WBGene00008226	-3.25442	-4.10694
WBGene00008421	-3.25184	-3.16539
WBGene00012758	-3.24679	-2.56344
WBGene00003654	-3.24662	-3.93834
WBGene00023314	-3.22751	-3.25312
WBGene00006830	-3.22388	-4.56909
WBGene00010779	-3.22027	-2.05296
WBGene00020373	-3.21548	-3.9616
WBGene00013153	-3.21303	-2.47895
WBGene00022497	-3.21271	-2.83899
WBGene00018223	-3.20937	-1.28219
WBGene00022272	-3.20838	-2.53333
WBGene00077558	-3.20815	-3.6735
WBGene00011575	-3.19982	-4.43284
WBGene00008270	-3.19808	-2.39593
WBGene00235367	-3.19219	-1.72871
WBGene00194747	-3.19115	-5.18867
WBGene00011497	-3.17669	-3.10761
WBGene00013244	-3.17551	-3.85489
WBGene00016319	-3.17409	-2.58396
WBGene00012898	-3.15647	-1.17766
WBGene00000393	-3.14758	-3.31021
WBGene00044209	-3.14617	-1.89085
WBGene00000219	-3.13894	-2.1242
WBGene00019030	-3.13788	-4.46535
WBGene00008782	-3.12944	-1.49664
WBGene00017949	-3.12918	-2.98195
WBGene00001859	-3.12162	-2.28634
WBGene00235300	-3.11773	-3.6786
WBGene00018204	-3.11676	-3.0572
WBGene00197474	-3.11227	-3.09798
WBGene00021244	-3.10656	-5.17199
WBGene00008178	-3.10453	-2.39192
WBGene00008622	-3.10418	-2.14325
WBGene00018929	-3.0997	-1.00632
WBGene00022017	-3.09922	-2.4812
WBGene00021637	-3.09243	-3.16729
WBGene00020930	-3.08775	-1.18083
WBGene00013321	-3.08755	-3.58107
WBGene00009889	-3.08368	-4.37033
WBGene00013563	-3.07103	-3.40018
WBGene00007242	-3.06735	-3.57088
WBGene00044639	-3.067	-2.74107
WBGene00013776	-3.05505	-3.1369
WBGene00015576	-3.05262	-2.34749
WBGene00007331	-3.0517	-4.33646
WBGene00018202	-3.0517	-2.83475
WBGene00219758	-3.05028	-1.92146
WBGene00008930	-3.04662	-2.53557
WBGene00045238	-3.04484	-2.35338
WBGene00008949	-3.03869	-1.73233
WBGene00021968	-3.03801	-4.03047
WBGene00013409	-3.03759	-2.66952
WBGene00003585	-3.00898	-3.17417
WBGene00013692	-3.0077	-5.15746
WBGene00014914	-3.00383	-1.73639
WBGene00021271	-3.00253	-2.88875
WBGene00019302	-3.00111	-2.14284
WBGene00006594	-2.99589	-2.2793
WBGene00011433	-2.98761	-3.13524
WBGene00017630	-2.98731	-3.85828
WBGene00003182	-2.98399	-4.22252
WBGene00007133	-2.97961	-2.9159
WBGene00021531	-2.9775	-3.23836
WBGene00019814	-2.97601	-2.91971
WBGene00077636	-2.97426	-3.15268
WBGene00021656	-2.96845	-3.45078
WBGene00269431	-2.96646	-1.09645
WBGene00015492	-2.96385	-2.50882
WBGene00007982	-2.95638	-2.4579
WBGene00007899	-2.95572	-3.93706
WBGene00004347	-2.94257	-3.88959
WBGene00022270	-2.94195	-3.01587
WBGene00012373	-2.93276	-2.36418
WBGene00044038	-2.92844	-2.43817
WBGene00012003	-2.91895	-2.06228
WBGene00077761	-2.90045	-3.28131
WBGene00020164	-2.89724	-1.13261
WBGene00020100	-2.89672	-2.31422
WBGene00005147	-2.89629	-2.93506
WBGene00017890	-2.8824	-3.07975
WBGene00015569	-2.8768	-2.38704
WBGene00010587	-2.87327	-3.62603
WBGene00044502	-2.87133	-3.87869
WBGene00044517	-2.86573	-2.28265
WBGene00010550	-2.86321	-2.63463
WBGene00008086	-2.86281	-3.16574
WBGene00000214	-2.8594	-2.18642
WBGene00012374	-2.8579	-2.29824
WBGene00011200	-2.85786	-4.36234
WBGene00044261	-2.85323	-4.27413
WBGene00004045	-2.84698	-1.02441
WBGene00015158	-2.84264	-4.58959
WBGene00016029	-2.84231	-1.41053
WBGene00194675	-2.83494	-3.25883
WBGene00021542	-2.82863	-2.41429
WBGene00020778	-2.81259	-4.39839
WBGene00044281	-2.80247	-2.29109
WBGene00003655	-2.79106	-3.21928
WBGene00023491	-2.7817	-3.4854
WBGene00045468	-2.78071	-2.82211
WBGene00010726	-2.77762	-1.07746
WBGene00016512	-2.77142	-1.70025
WBGene00022508	-2.75618	-3.89405
WBGene00016346	-2.75421	-1.32808
WBGene00021372	-2.74371	-3.12117
WBGene00008726	-2.73609	-2.48095
WBGene00019816	-2.72195	-3.33107
WBGene00017627	-2.72157	-1.32672
WBGene00004056	-2.71544	-3.50963
WBGene00194680	-2.71142	-1.4225
WBGene00016264	-2.70705	-4.10314
WBGene00019170	-2.70009	-5.566
WBGene00019200	-2.6925	-3.91891
WBGene00007717	-2.69073	-3.37042
WBGene00018664	-2.68613	-2.19287
WBGene00014871	-2.68053	-1.32511
WBGene00006985	-2.67866	-2.30369
WBGene00022030	-2.66803	-2.54771
WBGene00015647	-2.65689	-3.89014
WBGene00010003	-2.65654	-1.52371
WBGene00015518	-2.63702	-3.77143
WBGene00000545	-2.63269	-2.00347
WBGene00003602	-2.63084	-2.36618
WBGene00012851	-2.62354	-3.25551
WBGene00018990	-2.62106	-1.52877
WBGene00017069	-2.61659	-1.88524
WBGene00010067	-2.61441	-1.20937
WBGene00010868	-2.61183	-4.05974
WBGene00017071	-2.59898	-2.17313
WBGene00004509	-2.59625	-1.708
WBGene00021863	-2.59563	-1.65101
WBGene00219609	-2.59169	-2.78869
WBGene00009962	-2.58082	-2.12425
WBGene00018634	-2.5774	-1.95878
WBGene00019131	-2.57528	-1.70863
WBGene00022039	-2.57338	-3.38588
WBGene00009788	-2.56626	-2.95004
WBGene00010043	-2.56307	-3.97316
WBGene00010449	-2.5583	-5.27485
WBGene00019872	-2.55572	-2.02198
WBGene00021402	-2.55471	-2.79478
WBGene00022110	-2.54439	-3.14881
WBGene00220078	-2.53341	-1.2682
WBGene00021387	-2.52681	-2.07416
WBGene00012755	-2.52619	-5.47943
WBGene00011398	-2.52581	-2.5218
WBGene00021673	-2.5153	-1.64215
WBGene00006527	-2.51026	-1.81588
WBGene00003750	-2.50799	-2.85397
WBGene00016703	-2.49837	-3.61004
WBGene00020902	-2.49021	-1.91629
WBGene00012970	-2.48783	-3.65137
WBGene00012831	-2.48159	-1.42984
WBGene00007419	-2.47831	-3.90435
WBGene00007771	-2.47581	-1.0434
WBGene00006753	-2.46581	-1.731
WBGene00020207	-2.46286	-1.84965
WBGene00003552	-2.4625	-2.33913
WBGene00022131	-2.45941	-3.66116
WBGene00008090	-2.44676	-2.65917
WBGene00007485	-2.43749	-3.18616
WBGene00013603	-2.43185	-2.20144
WBGene00012909	-2.42997	-4.49582
WBGene00009043	-2.4267	-3.07419
WBGene00019735	-2.42534	-3.16413
WBGene00014947	-2.41947	-1.61168
WBGene00021483	-2.41598	-3.30071
WBGene00009702	-2.39438	-2.09676
WBGene00007126	-2.37	-2.04582
WBGene00016639	-2.36681	-2.07159
WBGene00014027	-2.36353	-3.07932
WBGene00010734	-2.36232	-2.03391
WBGene00018608	-2.35795	-1.25681
WBGene00017556	-2.34549	-2.87921
WBGene00009741	-2.34363	-2.31654
WBGene00077728	-2.34026	-3.72083
WBGene00009148	-2.3364	-2.55274
WBGene00194836	-2.32991	-2.17309
WBGene00012412	-2.32795	-3.24679
WBGene00001909	-2.32611	-2.29204
WBGene00022690	-2.31615	-1.58647
WBGene00016072	-2.31543	-1.90367
WBGene00008121	-2.31482	-3.34714
WBGene00014207	-2.31177	-1.55973
WBGene00004857	-2.30754	-2.83222
WBGene00017182	-2.30657	-3.18591
WBGene00013348	-2.30012	-2.34062
WBGene00017453	-2.29195	-5.50373
WBGene00013574	-2.28476	-2.19884
WBGene00022512	-2.27566	-2.97292
WBGene00012569	-2.27241	-1.56358
WBGene00019303	-2.26988	-1.59242
WBGene00019739	-2.26824	-2.65044
WBGene00001244	-2.2673	-2.64267
WBGene00014672	-2.26715	-1.20587
WBGene00011131	-2.26432	-1.42413
WBGene00004120	-2.26142	-1.57233
WBGene00008446	-2.25914	-2.20227
WBGene00021345	-2.25127	-1.7323
WBGene00009081	-2.25086	-3.06529
WBGene00010204	-2.24788	-1.79003
WBGene00000112	-2.24542	-2.33057
WBGene00011498	-2.23618	-1.65627
WBGene00015014	-2.23431	-2.48804
WBGene00000636	-2.23371	-3.07032
WBGene00007924	-2.23124	-1.57388
WBGene00022290	-2.23063	-1.11121
WBGene00011777	-2.22054	-3.29383
WBGene00014166	-2.2186	-1.42877
WBGene00013612	-2.21855	-1.1038
WBGene00013165	-2.21763	-3.14091
WBGene00022354	-2.21557	-3.07541
WBGene00021654	-2.21468	-2.06578
WBGene00004352	-2.21455	-2.4748
WBGene00010811	-2.21413	-2.14299
WBGene00013062	-2.20697	-1.0022
WBGene00185098	-2.20309	-2.25224
WBGene00003903	-2.20219	-3.04595
WBGene00021464	-2.19439	-1.35345
WBGene00016177	-2.19234	-2.43942
WBGene00000821	-2.18885	-1.13593
WBGene00220089	-2.17639	-3.92642
WBGene00020450	-2.16339	-1.13582
WBGene00011757	-2.15953	-3.80911
WBGene00013249	-2.15285	-1.35299
WBGene00003637	-2.15014	-1.90635
WBGene00012922	-2.14905	-2.41602
WBGene00043068	-2.14794	-1.8908
WBGene00009644	-2.14266	-2.76626
WBGene00012981	-2.13988	-3.87953
WBGene00008536	-2.13264	-1.58608
WBGene00020527	-2.11589	-1.7333
WBGene00219207	-2.11545	-1.04729
WBGene00011049	-2.11111	-2.52026
WBGene00008929	-2.10993	-1.2286
WBGene00021246	-2.10874	-2.40165
WBGene00020797	-2.09712	-2.41416
WBGene00019138	-2.09474	-1.45144
WBGene00022178	-2.08492	-2.82671
WBGene00009544	-2.07941	-3.36324
WBGene00021702	-2.07659	-4.31142
WBGene00044541	-2.0741	-1.3683
WBGene00017980	-2.07264	-3.09586
WBGene00019491	-2.07068	-2.22846
WBGene00015504	-2.06622	-2.79238
WBGene00199724	-2.06458	-2.20753
WBGene00020852	-2.05652	-3.29706
WBGene00006843	-2.051	-5.0719
WBGene00015096	-2.04867	-4.31508
WBGene00013100	-2.02784	-2.53044
WBGene00021509	-2.01799	-2.14891
WBGene00017796	-2.01586	-1.45411
WBGene00014292	-2.01002	-1.92954
WBGene00012461	-2.00322	-5.386
WBGene00020401	-2.00203	-3.71671
WBGene00010989	-1.97821	-3.04064
WBGene00019638	-1.97451	-1.1706
WBGene00249826	-1.97239	-1.2593
WBGene00018667	-1.96805	-1.7951
WBGene00019139	-1.9677	-1.58663
WBGene00022379	-1.9659	-2.98494
WBGene00020666	-1.96467	-2.35933
WBGene00019159	-1.96464	-1.06053
WBGene00014536	-1.95382	-1.7499
WBGene00003414	-1.95063	-2.25395
WBGene00022198	-1.94808	-1.84434
WBGene00009292	-1.93465	-3.6021
WBGene00045203	-1.93435	-1.72849
WBGene00010813	-1.92896	-2.64263
WBGene00194884	-1.92859	-3.94821
WBGene00015639	-1.92535	-1.18893
WBGene00006975	-1.92317	-1.28581
WBGene00001042	-1.92266	-1.8587
WBGene00020306	-1.92194	-2.42662
WBGene00044217	-1.92022	-2.56831
WBGene00018044	-1.91626	-4.19422
WBGene00018455	-1.91579	-1.19545
WBGene00000177	-1.91157	-3.05821
WBGene00015456	-1.90497	-1.64737
WBGene00185077	-1.90361	-1.7801
WBGene00044907	-1.90056	-1.46412
WBGene00004202	-1.89318	-1.49338
WBGene00000216	-1.88411	-1.92775
WBGene00014535	-1.87929	-1.98927
WBGene00014598	-1.87676	-1.82421
WBGene00015231	-1.87615	-3.06968
WBGene00013485	-1.86454	-2.41273
WBGene00006575	-1.86264	-2.31688
WBGene00019082	-1.86004	-2.00205
WBGene00018075	-1.85905	-1.34637
WBGene00008996	-1.85775	-1.40565
WBGene00023140	-1.84887	-1.55112
WBGene00018658	-1.84315	-2.01222
WBGene00014382	-1.84051	-2.331
WBGene00015236	-1.83834	-1.45275
WBGene00014561	-1.83654	-1.95576
WBGene00010619	-1.82861	-2.20065
WBGene00044742	-1.82569	-1.59835
WBGene00016931	-1.82393	-2.96497
WBGene00013159	-1.82065	-1.16714
WBGene00044056	-1.81702	-1.38484
WBGene00012492	-1.81469	-1.60791
WBGene00004057	-1.814	-1.79042
WBGene00019381	-1.81323	-1.5613
WBGene00007900	-1.81301	-2.69064
WBGene00045053	-1.81018	-3.42385
WBGene00021635	-1.80992	-3.201
WBGene00013594	-1.80752	-3.17871
WBGene00012201	-1.80712	-1.66488
WBGene00019858	-1.80673	-2.78846
WBGene00014337	-1.80556	-1.42291
WBGene00018578	-1.80447	-2.80179
WBGene00015016	-1.80193	-1.53959
WBGene00021675	-1.8017	-2.40854
WBGene00022988	-1.79838	-1.89278
WBGene00014987	-1.78326	-1.93386
WBGene00016678	-1.78292	-1.66267
WBGene00014330	-1.78104	-1.87248
WBGene00010711	-1.78035	-1.13364
WBGene00020564	-1.77485	-1.62835
WBGene00044641	-1.77307	-2.03018
WBGene00000368	-1.76473	-1.33934
WBGene00019434	-1.76212	-2.0593
WBGene00219766	-1.75128	-2.21312
WBGene00019729	-1.74856	-2.40573
WBGene00014344	-1.7478	-1.8434
WBGene00022834	-1.74598	-1.79196
WBGene00235340	-1.74411	-1.31558
WBGene00022435	-1.7337	-3.34233
WBGene00008384	-1.72974	-3.54752
WBGene00018390	-1.72941	-2.03134
WBGene00021884	-1.72695	-2.69211
WBGene00001976	-1.72128	-1.72095
WBGene00009988	-1.71874	-2.01042
WBGene00000546	-1.71775	-1.52977
WBGene00023008	-1.7139	-1.30902
WBGene00000207	-1.7117	-3.05848
WBGene00199886	-1.71149	-1.71453
WBGene00014206	-1.7074	-1.30902
WBGene00009713	-1.70409	-1.02104
WBGene00023138	-1.69799	-1.46702
WBGene00023170	-1.69419	-1.48714
WBGene00002071	-1.69239	-1.4534
WBGene00044499	-1.68666	-2.76622
WBGene00014345	-1.68084	-1.78501
WBGene00022937	-1.67999	-2.22272
WBGene00000535	-1.67872	-1.50659
WBGene00001905	-1.67438	-1.64244
WBGene00044154	-1.66865	-1.61391
WBGene00219241	-1.66698	-2.29649
WBGene00017423	-1.6666	-1.06267
WBGene00198544	-1.66309	-1.2516
WBGene00021369	-1.65829	-1.2372
WBGene00199059	-1.65765	-1.45081
WBGene00195568	-1.65724	-1.81272
WBGene00001459	-1.64939	-1.31499
WBGene00012890	-1.64796	-1.75131
WBGene00200112	-1.64688	-1.87006
WBGene00014327	-1.64526	-1.4559
WBGene00196907	-1.63597	-1.78609
WBGene00006384	-1.63364	-2.21039
WBGene00001639	-1.62917	-1.5732
WBGene00014411	-1.62808	-1.84901
WBGene00010212	-1.62787	-2.29787
WBGene00001915	-1.62304	-1.39171
WBGene00200652	-1.61759	-2.19392
WBGene00021037	-1.61593	-1.01327
WBGene00015796	-1.61427	-2.70913
WBGene00013289	-1.61035	-1.13584
WBGene00021000	-1.60821	-1.45313
WBGene00206380	-1.6055	-2.09648
WBGene00013236	-1.60019	-2.03688
WBGene00006432	-1.59942	-2.47305
WBGene00199628	-1.59105	-1.78047
WBGene00014591	-1.58542	-1.41645
WBGene00014368	-1.58372	-1.65892
WBGene00009323	-1.57861	-1.66598
WBGene00050947	-1.57733	-1.3367
WBGene00018965	-1.57712	-2.82279
WBGene00255736	-1.57143	-1.87292
WBGene00007114	-1.56737	-1.76889
WBGene00023006	-1.5611	-1.09536
WBGene00014602	-1.56075	-2.12323
WBGene00023032	-1.55888	-1.29693
WBGene00022749	-1.55678	-2.05423
WBGene00016937	-1.55597	-2.2072
WBGene00022026	-1.54722	-3.00058
WBGene00001111	-1.54535	-1.27783
WBGene00017344	-1.5288	-2.53421
WBGene00022973	-1.52604	-1.46351
WBGene00014385	-1.52043	-1.20903
WBGene00196863	-1.52043	-1.18985
WBGene00000221	-1.51494	-3.17097
WBGene00197737	-1.51309	-1.27205
WBGene00011303	-1.49857	-2.22807
WBGene00014328	-1.47435	-1.26779
WBGene00015386	-1.47219	-2.54652
WBGene00019789	-1.4537	-1.22643
WBGene00195169	-1.45344	-2.39329
WBGene00007923	-1.45177	-1.24765
WBGene00003917	-1.45075	-1.17547
WBGene00219912	-1.43407	-1.90617
WBGene00012396	-1.43041	-1.59035
WBGene00202153	-1.42536	-1.62745
WBGene00010722	-1.42424	-5.64369
WBGene00014801	-1.42355	-2.50895
WBGene00013269	-1.41675	-1.72878
WBGene00021374	-1.41503	-2.45925
WBGene00021941	-1.40885	-1.42549
WBGene00012158	-1.39515	-2.92493
WBGene00016622	-1.38896	-1.18642
WBGene00018773	-1.38709	-1.46955
WBGene00003153	-1.38391	-1.61467
WBGene00201595	-1.37918	-1.12244
WBGene00022936	-1.37823	-1.95357
WBGene00201932	-1.37823	-1.95357
WBGene00008398	-1.37442	-1.47631
WBGene00019955	-1.3676	-5.03842
WBGene00023038	-1.36601	-3.03383
WBGene00007099	-1.36501	-1.82768
WBGene00002264	-1.36232	-1.51233
WBGene00014547	-1.35322	-2.99693
WBGene00001736	-1.3531	-1.44057
WBGene00044420	-1.35269	-1.34675
WBGene00014352	-1.35233	-2.99655
WBGene00010364	-1.35223	-1.01099
WBGene00013569	-1.34092	-1.119
WBGene00014611	-1.33663	-3.04703
WBGene00018804	-1.33252	-2.31848
WBGene00009354	-1.33184	-1.57172
WBGene00004849	-1.32868	-1.43725
WBGene00009161	-1.32716	-1.89432
WBGene00020729	-1.32492	-1.16369
WBGene00195867	-1.32012	-2.95058
WBGene00021302	-1.31686	-1.21823
WBGene00010407	-1.31621	-3.77303
WBGene00014548	-1.31595	-2.98903
WBGene00018579	-1.31278	-2.78197
WBGene00022914	-1.31012	-3.02095
WBGene00021687	-1.30624	-1.29293
WBGene00198447	-1.30574	-3.00916
WBGene00007198	-1.30065	-2.51409
WBGene00022366	-1.29157	-2.02554
WBGene00017736	-1.28963	-3.93273
WBGene00219759	-1.28881	-1.96212
WBGene00195864	-1.2871	-2.92935
WBGene00201931	-1.28501	-2.97146
WBGene00021875	-1.28281	-2.98779
WBGene00015989	-1.27473	-1.1433
WBGene00023011	-1.27372	-2.91531
WBGene00014836	-1.27326	-1.16156
WBGene00017767	-1.2701	-1.08421
WBGene00001426	-1.2689	-1.9502
WBGene00023094	-1.26719	-3.02472
WBGene00019441	-1.26377	-1.08619
WBGene00014213	-1.2621	-2.19536
WBGene00045052	-1.26195	-2.01535
WBGene00023076	-1.26067	-2.97499
WBGene00197602	-1.25917	-2.88153
WBGene00008568	-1.25493	-1.10959
WBGene00018770	-1.25459	-1.90287
WBGene00023035	-1.25314	-3.01325
WBGene00023178	-1.25161	-3.0124
WBGene00001814	-1.2508	-1.20769
WBGene00023005	-1.24662	-2.96186
WBGene00016112	-1.24541	-2.38981
WBGene00023421	-1.24386	-1.58903
WBGene00022915	-1.24024	-2.93135
WBGene00015351	-1.24	-2.86789
WBGene00010783	-1.2366	-2.45013
WBGene00199591	-1.2364	-3.00108
WBGene00023092	-1.23564	-2.9907
WBGene00199108	-1.23522	-2.84346
WBGene00023182	-1.23498	-2.95146
WBGene00000462	-1.23338	-2.02547
WBGene00020397	-1.23133	-2.5712
WBGene00197513	-1.22706	-2.93734
WBGene00016061	-1.22253	-1.69667
WBGene00013158	-1.22026	-3.50964
WBGene00008420	-1.21728	-1.22013
WBGene00021664	-1.2144	-2.00682
WBGene00010209	-1.21366	-1.19539
WBGene00012222	-1.2061	-1.4608
WBGene00001941	-1.20466	-1.80462
WBGene00023179	-1.20121	-2.95716
WBGene00023139	-1.19969	-2.91072
WBGene00001678	-1.19569	-1.11378
WBGene00197243	-1.19329	-2.88029
WBGene00012877	-1.19078	-2.31619
WBGene00219678	-1.18972	-1.13332
WBGene00007124	-1.18722	-1.47392
WBGene00016172	-1.17818	-2.04379
WBGene00010756	-1.17655	-3.15058
WBGene00196798	-1.17515	-2.86405
WBGene00045272	-1.16986	-1.36569
WBGene00200120	-1.16708	-2.88985
WBGene00017828	-1.1667	-1.38564
WBGene00023063	-1.15831	-2.97381
WBGene00023169	-1.15028	-1.43537
WBGene00013984	-1.15019	-1.87354
WBGene00199612	-1.14989	-2.82294
WBGene00021118	-1.14972	-4.29135
WBGene00022916	-1.14961	-2.94858
WBGene00017219	-1.14642	-1.46009
WBGene00017887	-1.14599	-2.21042
WBGene00014608	-1.1458	-2.88909
WBGene00021809	-1.14471	-3.72635
WBGene00019535	-1.14302	-1.61954
WBGene00014546	-1.14268	-2.90927
WBGene00000735	-1.1422	-2.30269
WBGene00045150	-1.13586	-1.73799
WBGene00022953	-1.13361	-2.96522
WBGene00014476	-1.12756	-2.91653
WBGene00012431	-1.11497	-1.2239
WBGene00044233	-1.11058	-1.34869
WBGene00010362	-1.11009	-1.62156
WBGene00014082	-1.10283	-1.11889
WBGene00012195	-1.09099	-1.56671
WBGene00044588	-1.09077	-2.13168
WBGene00006738	-1.08125	-1.49877
WBGene00008349	-1.0805	-1.6856
WBGene00016799	-1.07759	-1.3416
WBGene00013162	-1.0595	-1.14841
WBGene00016823	-1.05231	-2.31326
WBGene00001008	-1.04898	-1.13333
WBGene00220238	-1.04698	-1.67009
WBGene00001911	-1.04202	-1.2893
WBGene00010477	-1.04052	-1.44809
WBGene00012908	-1.03842	-2.17904
WBGene00013242	-1.03822	-4.03268
WBGene00018337	-1.03822	-1.26929
WBGene00007603	-1.03567	-1.64913
WBGene00000536	-1.03406	-1.31343
WBGene00000734	-1.03194	-2.12135
WBGene00013575	-1.02523	-1.01964
WBGene00015128	-1.02104	-2.04355
WBGene00018862	-1.01958	-1.44404
WBGene00011399	-1.0037	-1.13977

[truncated: 7 more sheets: simr-1 25C gen10 up, mut-16 20C down, mut-16 20C up, mut-16 25C down, mut-16 25C up, prg-1 20C down, prg-1 20C up]
