# Supplementary material for: A tudor domain protein, SIMR-1, promotes siRNA production at piRNA-targeted mRNAs in C. elegans
Source: eLife. 2020 Apr 27;9:e56731. doi: 10.7554/eLife.56731 (PMC7255803; doi:10.7554/eLife.56731)
Supplement: Supplementary file 4. [file elife-56731-supp4.xlsx]

## Sheet: Table summary
Supplementary File 4. mRNA target predictions for simr-1-depleted piRNAs.
Sheet 1	Table summary
Sheet 2	log2FoldChange and predicted mRNA targets of piRNAs reduced in simr-1 mutants
Sheet 3	Log2FoldChange of predicted piRNA-target genes in simr-1 mutants

## Sheet: piRNAs reduced in simr-1
Supplementary File 4, Sheet 2. log2FoldChange and predicted mRNA targets of piRNAs reduced in simr-1 mutants.
Gene name	Public Name	log2FoldChange (simr-1/wild-type)	padj	Wild-type #1 (RPM)	Wild-type #2 (RPM)	simr-1 #1 (RPM)	simr-1 #2 (RPM)	predicted piRNA target genes using relaxed targeting rules and CLASH data
WBGene00173550	21ur-10059	-1.65929	0.000435526	8.03736	5.85939	1.8511	1.13586
WBGene00165462	21ur-10595	-1.25244	0.0493069	2.6276	2.06802	0.498373	0.454343	Y71H2B.10
WBGene00050430	21ur-1060	-1.28513	0.0456016	2.47303	1.37868	0.284785	0.302895	F22B7.5
WBGene00168161	21ur-10913	-1.69173	5.1505e-05	7.88279	10.5124	1.99349	2.19599
WBGene00165515	21ur-11062	-1.73427	0.00348551	3.70955	2.58502	0.569569	0.151448
WBGene00167757	21ur-11192	-1.45	0.0196685	2.47303	1.55101	0.355981	0
WBGene00170600	21ur-11360	-2.35902	2.04546e-06	7.72823	4.99771	0.569569	0.681514
WBGene00168270	21ur-11676	-1.17156	0.000690202	20.0934	12.5805	5.26852	6.96659
WBGene00046347	21ur-1187	-1.1861	0.0217691	5.40976	5.34238	1.56632	1.89309
WBGene00050466	21ur-128	-1.66126	0.000117245	8.19192	8.09974	1.9223	1.81737
WBGene00168041	21ur-13209	-1.37832	0.0163209	3.70955	4.48071	1.35273	0.530066
WBGene00170155	21ur-13456	-2.13095	6.42316e-05	4.94606	4.65304	0.640765	0.378619
WBGene00169064	21ur-13515	-2.11297	2.88741e-07	9.73756	11.3741	2.20708	1.13586
WBGene00164993	21ur-13666	-1.3269	0.0368182	2.1639	2.24035	0.498373	0.227171
WBGene00171932	21ur-13670	-2.75667	7.2621e-19	20.0934	23.6099	2.13588	2.72606
WBGene00170301	21ur-13678	-1.0131	0.0080648	11.4378	10.6848	4.48536	4.7706
WBGene00169180	21ur-13736	-1.2164	0.0175562	4.94606	7.06573	1.42392	2.34744
WBGene00165622	21ur-14192	-2.88531	3.52173e-12	12.5197	10.5124	0.711962	1.13586
WBGene00173271	21ur-14439	-1.51617	8.3513e-05	11.7469	9.82309	3.27502	2.65033
WBGene00050343	21ur-1478	-1.35702	0.0022017	9.11931	7.75507	3.20383	1.81737
WBGene00173019	21ur-14891	-1.78651	0.00884142	1.70021	1.89568	0	0.0757238
WBGene00173510	21ur-15087	-1.0903	0.00405802	13.2925	9.82309	4.77014	4.31625
WBGene00167956	21ur-15574	-1.88546	5.61285e-07	17.6204	9.47842	2.77665	2.72606
WBGene00165356	21ur-15630	-3.0794	2.07021e-12	10.665	10.3401	0.640765	0.681514
WBGene00049378	21ur-1575	-1.13864	0.00272688	11.5923	10.5124	4.41416	3.93764	F23D12.5	K07E3.2
WBGene00045706	21ur-163	-1.0372	0.00544207	14.2199	10.1678	5.19732	4.84632	H34C03.2
WBGene00049776	21ur-1725	-1.03182	0.0428551	7.72823	5.17005	3.06143	1.81737
WBGene00050543	21ur-2508	-1.62564	0.00456662	3.86411	3.27436	0.711962	0.454343
WBGene00049052	21ur-2627	-1.54098	0.0130567	1.70021	1.89568	0.213588	0
WBGene00050221	21ur-2632	-1.20539	0.0364994	5.71889	2.75736	1.35273	1.06013
WBGene00045751	21ur-2649	-1.61148	4.15166e-31	111.596	110.467	35.8117	29.8352	H28O16.1
WBGene00047247	21ur-2699	-1.24812	0.0479813	2.31847	2.75736	0.640765	0.454343	F32D8.4	F56D2.2
WBGene00048270	21ur-2821	-1.54861	0.0104151	5.40976	1.37868	0.711962	0.227171
WBGene00045860	21ur-31	-1.1066	0.000302402	34.6225	18.0952	11.7474	9.38975
WBGene00046285	21ur-311	-1.8066	9.06731e-07	12.8289	12.4081	3.34622	2.19599
WBGene00048800	21ur-3395	-1.10803	0.0204299	7.88279	5.85939	2.77665	2.19599	K03H6.5
WBGene00046163	21ur-361	-1.17908	0.023878	5.87345	4.99771	2.13588	1.36303	Y43E12A.1
WBGene00050675	21ur-3727	-1.31633	4.03423e-08	29.2127	29.1246	11.1066	9.46547
WBGene00050819	21ur-3841	-1.20506	0.0286876	5.25519	3.79137	1.42392	1.2873	Y53C12B.1
WBGene00048393	21ur-3879	-1.09492	0.00481746	17.1567	10.6848	6.90603	3.93764	C48B4.11
WBGene00049871	21ur-3949	-1.11851	0.00162048	12.8289	12.9251	5.41091	4.61915	C14A4.5
WBGene00049290	21ur-3968	-1.21264	0.0164926	8.19192	4.30837	1.9223	2.04454	F48B9.8
WBGene00048278	21ur-4022	-1.10627	0.0327677	9.11931	4.65304	3.20383	1.5902
WBGene00045948	21ur-4033	-1.36538	0.00526212	6.64627	5.51472	1.49512	1.89309
WBGene00048340	21ur-44	-1.77835	3.66693e-05	8.50105	8.78908	2.20708	1.36303
WBGene00046236	21ur-4426	-1.12102	0.00350005	19.166	9.30609	5.41091	5.45211
WBGene00047655	21ur-445	-1.18081	7.70503e-05	19.166	18.0952	7.83158	6.3608	C18E3.7	F23B12.6	F56A6.1	H24K24.3
WBGene00050100	21ur-4532	-1.08754	2.68165e-05	35.3953	23.6099	13.0289	11.4343
WBGene00045602	21ur-4930	-2.21257	3.66808e-08	12.6743	9.82309	1.21033	2.12027
WBGene00048233	21ur-4933	-1.7626	0.000141727	6.64627	7.06573	1.35273	1.36303
WBGene00048657	21ur-4934	-1.11049	0.0258112	8.19192	4.82538	2.56306	2.04454	F02A9.6	B0285.1	Y39E4B.1	F44E2.7
WBGene00045722	21ur-4997	-1.3253	0.0261729	5.10063	2.24035	1.06794	0.60579	Y56A3A.18
WBGene00048652	21ur-5139	-1.02039	0.00546142	13.2925	11.0294	5.33971	4.84632
WBGene00046361	21ur-5450	-1.15133	0.00667064	10.8195	8.44441	4.34297	2.65033	W06D4.4	Y48C3A.11	F41E6.4
WBGene00047592	21ur-551	-1.16691	0.0026594	13.6017	9.13375	4.55655	3.78619
WBGene00171999	21ur-5643	-1.02404	0.0334103	14.5291	5.34238	4.62775	3.10467	C16A3.1
WBGene00168809	21ur-5666	-1.72389	1.3207e-15	42.5052	40.8434	9.61148	12.4187
WBGene00171643	21ur-5755	-1.09666	0.00349584	13.9108	10.3401	5.33971	4.16481	F15D3.1	C46F11.4	K09A9.6	C05C8.9	C14C11.2	H28G03.2	ZC317.7
WBGene00046912	21ur-582	-1.3214	0.00684776	8.03736	4.82538	1.8511	1.89309	H06I04.1
WBGene00168188	21ur-5987	-1.87752	2.27297e-08	13.6017	17.7505	3.55981	3.1804
WBGene00165950	21ur-6098	-1.56103	0.00856055	3.09129	2.92969	0.498373	0.454343
WBGene00174185	21ur-6116	-2.20699	7.36681e-12	24.4212	14.9931	3.20383	3.40757
WBGene00168748	21ur-6297	-1.42863	0.0223823	1.23652	1.89568	0.142392	0.0757238
WBGene00174610	21ur-6596	-1.62389	0.00349489	3.70955	4.48071	0.92555	0.530066
WBGene00169920	21ur-6617	-1.86051	5.57739e-11	23.0301	20.8525	5.6245	4.39198
WBGene00174901	21ur-7219	-1.25712	0.0202839	5.87345	3.79137	1.56632	1.21158
WBGene00173184	21ur-7405	-1.39324	0.00144146	8.50105	7.4104	2.49187	2.12027
WBGene00167610	21ur-7557	-2.07948	2.05583e-05	6.18258	6.20406	0.996746	0.681514
WBGene00174291	21ur-7611	-1.76345	2.44938e-20	49.3061	49.1155	13.1713	12.4187
WBGene00168647	21ur-7705	-1.41305	4.84016e-10	31.5312	34.467	10.9642	10.8285
WBGene00166637	21ur-7744	-1.53912	0.00303048	5.40976	4.99771	0.854354	1.43875
WBGene00047211	21ur-785	-1.07887	0.000881884	19.0114	13.7868	6.62124	6.73941
WBGene00170895	21ur-7986	-1.0068	0.000158275	23.0301	23.4376	10.7506	9.69264	ZK550.5
WBGene00166478	21ur-8017	-1.19595	0.0219719	4.48237	6.37639	1.9223	1.51448	T08B2.11
WBGene00172256	21ur-8272	-2.16188	5.75381e-07	9.27387	7.92741	1.13914	1.36303
WBGene00170367	21ur-8698	-1.82016	0.000646469	4.7915	4.30837	0.711962	0.681514
WBGene00173778	21ur-9441	-1.33542	1.96912e-08	30.6038	27.5736	10.3946	9.84409

## Sheet: predicted piRNA targets genes
Supplementary File 4, Sheet 3. Log2FoldChange of predicted piRNA-target genes in simr-1 mutants.
Gene name	Public Name	log2FoldChange (simr-1/wildtype)	SIMR-1 target
WBGene00019370	K03H6.5	-3.27989	yes
WBGene00018593	F48B9.8	-2.36012	yes
WBGene00010703	K09A9.6	-2.18243	yes
WBGene00019250	H28G03.2	-1.34351	yes
WBGene00019491	K07E3.2	-1.25987	yes
WBGene00013236	Y56A3A.18	-0.900409
WBGene00009089	F23D12.5	-0.792941
WBGene00012993	Y48C3A.11	-0.401906
WBGene00018420	F44E2.7	-0.392194
WBGene00015466	C05C8.9	-0.385188
WBGene00020349	T08B2.11	-0.33331
WBGene00019240	H24K24.3	-0.280758
WBGene00013999	ZK550.5	-0.155418
WBGene00008119	C46F11.4	-0.0746863
WBGene00018964	F56D2.2	0.048757
WBGene00015806	C16A3.1	0.0490475
WBGene00000866	Y43E12A.1	0.0496641
WBGene00001028	F22B7.5	0.0660765
WBGene00012714	Y39E4B.1	0.067247
WBGene00012298	W06D4.4	0.0959161
WBGene00015766	C14C11.2	0.0999071
WBGene00022590	ZC317.7	0.110616
WBGene00009329	F32D8.4	0.113949
WBGene00013143	Y53C12B.1	0.116638
WBGene00004093	C18E3.7	0.142643
WBGene00000798	C14A4.5	0.15131
WBGene00001609	F02A9.6	0.162589
WBGene00018921	F56A6.1	0.177228
WBGene00008174	C48B4.11	0.17889
WBGene00006465	F23B12.6	0.184895
WBGene00018285	F41E6.4	0.21539
WBGene00000160	Y71H2B.10	0.218694
WBGene00019259	H34C03.2	0.236295
WBGene00010419	H28O16.1	0.236592
WBGene00007135	B0285.1	0.288391
WBGene00019167	H06I04.1	0.443671
WBGene00001131	F15D3.1	2.18375
