# Supplementary material for: A tudor domain protein, SIMR-1, promotes siRNA production at piRNA-targeted mRNAs in C. elegans
Source: eLife. 2020 Apr 27;9:e56731. doi: 10.7554/eLife.56731 (PMC7255803; doi:10.7554/eLife.56731)
Supplement: Supplementary file 5. [file elife-56731-supp5.xlsx]

## Sheet: Table summary
Supplementary File 5. mRNA expression in simr-1 and mut-16 mutant animals.
Sheet 1	Table summary
Sheet 2	mRNAs significantly down-regulated 2 fold or greater in simr-1 mutant animals at 20ºC
Sheet 3	mRNAs significantly up-regulated 2 fold or greater in simr-1 mutant animals at 20ºC
Sheet 4	mRNAs significantly down-regulated 2 fold or greater in simr-1 mutant animals at 25ºC for one generation
Sheet 5	mRNAs significantly up-regulated 2 fold or greater in simr-1 mutant animals at 25ºC for one generation
Sheet 6	mRNAs significantly down-regulated 2 fold or greater in simr-1 mutant animals at 25ºC for two generations
Sheet 7	mRNAs significantly up-regulated 2 fold or greater in simr-1 mutant animals at 25ºC for two generations
Sheet 8	mRNAs significantly down-regulated 2 fold or greater in simr-1 mutant animals at 25ºC for seven generations
Sheet 9	mRNAs significantly up-regulated 2 fold or greater in simr-1 mutant animals at 25ºC for seven generations
Sheet 10	mRNAs significantly down-regulated 2 fold or greater in simr-1 mutant animals at 25ºC for 10 generations
Sheet 11	mRNAs significantly up-regulated 2 fold or greater in simr-1 mutant animals at 25ºC for 10 generations
Sheet 12	mRNAs significantly down-regulated 2 fold or greater in mut-16 mutant animals at 20ºC
Sheet 13	mRNAs significantly up-regulated 2 fold or greater in mut-16 mutant animals at 20ºC
Sheet 14	mRNAs significantly down-regulated 2 fold or greater in simr-1 mutant animals exclusively at 25ºC for 10 generations (not down-regulated at 20ºC or after a single generation at 25ºC)
Sheet 15	mRNAs significantly up-regulated 2 fold or greater in simr-1 mutant animals exclusively at 25ºC for 10 generations (not up-regulated at 20ºC or after a single generation at 25ºC)

## Sheet: simr-1 20C down
Supplementary File 5, Sheet 2: mRNAs significantly down-regulated 2 fold or greater in simr-1 mutant animals at 20ºC.
Gene name	log2FoldChange
WBGene00010295	-5.45966
WBGene00013007	-5.33323
WBGene00017186	-5.14554
WBGene00021107	-5.14554
WBGene00001900	-4.75565
WBGene00001884	-4.75565
WBGene00001888	-4.75565
WBGene00015504	-4.59391
WBGene00002015	-4.48797
WBGene00001917	-4.17065
WBGene00001886	-4.17065
WBGene00010209	-4.12521
WBGene00010212	-4.11228
WBGene00044213	-3.93424
WBGene00011610	-3.77341
WBGene00022222	-3.67065
WBGene00012237	-3.52854
WBGene00001918	-3.44475
WBGene00001889	-3.44475
WBGene00012673	-3.38921
WBGene00001883	-3.28779
WBGene00001887	-3.28779
WBGene00022203	-3.26417
WBGene00015860	-3.2106
WBGene00011608	-3.19879
WBGene00001885	-3.17748
WBGene00014955	-3.12019
WBGene00001899	-3.03242
WBGene00021986	-2.96231
WBGene00011607	-2.94658
WBGene00010293	-2.89834
WBGene00011612	-2.88853
WBGene00008350	-2.85848
WBGene00010314	-2.84285
WBGene00014954	-2.82977
WBGene00001119	-2.78986
WBGene00008349	-2.77901
WBGene00012898	-2.7748
WBGene00008863	-2.76834
WBGene00022206	-2.71892
WBGene00011611	-2.71234
WBGene00017153	-2.66657
WBGene00012564	-2.64102
WBGene00011606	-2.58375
WBGene00010294	-2.52026
WBGene00008862	-2.4864
WBGene00022227	-2.48189
WBGene00011613	-2.45557
WBGene00020183	-2.41763
WBGene00021342	-2.36241
WBGene00015014	-2.35291
WBGene00008621	-2.32193
WBGene00002019	-2.31545
WBGene00002020	-2.31545
WBGene00004054	-2.30976
WBGene00009526	-2.27242
WBGene00000722	-2.26356
WBGene00015456	-2.24848
WBGene00022211	-2.22868
WBGene00077636	-2.22259
WBGene00022096	-2.22173
WBGene00021055	-2.19093
WBGene00044700	-2.18889
WBGene00009247	-2.1851
WBGene00022221	-2.14878
WBGene00007454	-2.06473
WBGene00043980	-1.94225
WBGene00012867	-1.86065
WBGene00022205	-1.80995
WBGene00010451	-1.71881
WBGene00021745	-1.68772
WBGene00021886	-1.68236
WBGene00008681	-1.64273
WBGene00009299	-1.63444
WBGene00011812	-1.62034
WBGene00006449	-1.60914
WBGene00013826	-1.57544
WBGene00021671	-1.56768
WBGene00018223	-1.54078
WBGene00019138	-1.53002
WBGene00004976	-1.51788
WBGene00022083	-1.51639
WBGene00011805	-1.51101
WBGene00010768	-1.50227
WBGene00001935	-1.49736
WBGene00017101	-1.4889
WBGene00235353	-1.47715
WBGene00018664	-1.41163
WBGene00021772	-1.37216
WBGene00016953	-1.35132
WBGene00006925	-1.351
WBGene00015865	-1.3314
WBGene00015012	-1.31583
WBGene00012198	-1.3156
WBGene00013554	-1.30952
WBGene00000657	-1.30447
WBGene00009982	-1.30082
WBGene00000712	-1.26987
WBGene00000753	-1.26914
WBGene00017796	-1.25427
WBGene00010034	-1.2439
WBGene00008634	-1.23649
WBGene00007675	-1.22944
WBGene00000703	-1.21381
WBGene00012676	-1.20306
WBGene00012623	-1.19448
WBGene00011910	-1.19147
WBGene00004932	-1.18142
WBGene00011339	-1.17609
WBGene00016540	-1.1706
WBGene00021619	-1.16977
WBGene00009515	-1.16951
WBGene00000740	-1.15856
WBGene00003958	-1.15667
WBGene00006927	-1.13605
WBGene00022017	-1.13596
WBGene00000732	-1.13577
WBGene00012323	-1.12215
WBGene00019550	-1.10946
WBGene00018898	-1.10926
WBGene00000667	-1.09761
WBGene00014914	-1.08598
WBGene00001581	-1.08518
WBGene00015932	-1.08482
WBGene00001594	-1.07876
WBGene00007376	-1.07821
WBGene00010550	-1.07758
WBGene00003015	-1.06803
WBGene00003559	-1.06499
WBGene00015016	-1.05649
WBGene00014692	-1.05177
WBGene00011522	-1.05094
WBGene00017594	-1.0485
WBGene00001399	-1.03834
WBGene00012802	-1.03491
WBGene00019139	-1.0194
WBGene00000801	-1.01876
WBGene00016492	-1.01594
WBGene00021340	-1.00606

## Sheet: simr-1 20C up
Supplementary File 5, Sheet 3: mRNAs significantly up-regulated 2 fold or greater in simr-1 mutant animals at 20ºC.
Gene name	log2FoldChange
WBGene00017069	5.95029
WBGene00010249	5.69481
WBGene00015230	4.63967
WBGene00015229	4.44813
WBGene00009326	4.28608
WBGene00016951	4.11796
WBGene00015236	3.77455
WBGene00011683	3.41326
WBGene00019534	3.35779
WBGene00016885	3.22488
WBGene00022623	3.16466
WBGene00007509	2.97466
WBGene00000372	2.9478
WBGene00003569	2.93422
WBGene00019267	2.88057
WBGene00014006	2.85565
WBGene00017471	2.77307
WBGene00017246	2.5894
WBGene00008495	2.55262
WBGene00004144	2.38629
WBGene00017499	2.3843
WBGene00018543	2.38397
WBGene00008841	2.2937
WBGene00011262	2.29144
WBGene00219413	2.27466
WBGene00001483	2.24662
WBGene00003096	2.24196
WBGene00016037	2.21176
WBGene00016781	2.1567
WBGene00008027	2.15333
WBGene00000232	2.14979
WBGene00019200	2.11107
WBGene00016782	2.10377
WBGene00050946	2.10023
WBGene00017490	2.08585
WBGene00017500	2.08585
WBGene00269421	2.08182
WBGene00009383	2.06901
WBGene00018303	2.06708
WBGene00077764	2.04634
WBGene00019772	2.0413
WBGene00044357	2.02235
WBGene00044337	2.02235
WBGene00044174	2.01939
WBGene00001687	1.99084
WBGene00016845	1.96918
WBGene00017247	1.9158
WBGene00019598	1.89692
WBGene00021279	1.89582
WBGene00008558	1.89172
WBGene00044260	1.88509
WBGene00015392	1.8789
WBGene00235310	1.87206
WBGene00044339	1.8713
WBGene00011870	1.86925
WBGene00008298	1.86914
WBGene00020862	1.8545
WBGene00018202	1.84358
WBGene00010940	1.83452
WBGene00023477	1.83026
WBGene00004023	1.82432
WBGene00019439	1.82066
WBGene00021797	1.81729
WBGene00015740	1.79268
WBGene00007489	1.76972
WBGene00020954	1.76377
WBGene00009896	1.75494
WBGene00000280	1.75413
WBGene00006765	1.71996
WBGene00044644	1.7024
WBGene00011801	1.68255
WBGene00012424	1.67969
WBGene00010953	1.67323
WBGene00021858	1.66476
WBGene00008028	1.66034
WBGene00044520	1.63906
WBGene00011800	1.63894
WBGene00011869	1.62922
WBGene00009386	1.61053
WBGene00019072	1.60426
WBGene00019316	1.5906
WBGene00008599	1.58017
WBGene00015477	1.5726
WBGene00000989	1.57138
WBGene00015756	1.57042
WBGene00010124	1.56681
WBGene00015759	1.56011
WBGene00017265	1.55867
WBGene00013853	1.55855
WBGene00016481	1.55289
WBGene00044219	1.52845
WBGene00004119	1.51555
WBGene00021966	1.50908
WBGene00016677	1.50635
WBGene00009640	1.496
WBGene00022236	1.48595
WBGene00015805	1.47587
WBGene00020988	1.47547
WBGene00012492	1.45898
WBGene00010989	1.4561
WBGene00043998	1.44962
WBGene00016898	1.44847
WBGene00011979	1.42978
WBGene00017390	1.42275
WBGene00019789	1.41964
WBGene00008810	1.41114
WBGene00014233	1.40461
WBGene00013887	1.38527
WBGene00013074	1.38225
WBGene00011839	1.37689
WBGene00007507	1.3603
WBGene00009637	1.35329
WBGene00006583	1.34841
WBGene00021034	1.31605
WBGene00006404	1.31481
WBGene00010972	1.30475
WBGene00008356	1.2681
WBGene00007073	1.26602
WBGene00017441	1.2503
WBGene00019605	1.2455
WBGene00012585	1.2265
WBGene00008388	1.21639
WBGene00009518	1.21551
WBGene00011486	1.21176
WBGene00007173	1.1795
WBGene00012146	1.1795
WBGene00044268	1.17725
WBGene00003632	1.17552
WBGene00010485	1.16553
WBGene00000373	1.16192
WBGene00009638	1.15262
WBGene00015355	1.14063
WBGene00015478	1.12974
WBGene00018929	1.12686
WBGene00000051	1.1236
WBGene00021928	1.1171
WBGene00010362	1.11335
WBGene00004344	1.11213
WBGene00017135	1.10752
WBGene00000557	1.10528
WBGene00019189	1.0971
WBGene00010520	1.09632
WBGene00044502	1.09624
WBGene00015483	1.09201
WBGene00011752	1.08537
WBGene00018052	1.08447
WBGene00009639	1.08304
WBGene00022416	1.08115
WBGene00077757	1.07296
WBGene00017364	1.07101
WBGene00017729	1.07001
WBGene00007283	1.06259
WBGene00016119	1.05859
WBGene00010756	1.05211
WBGene00009096	1.04513
WBGene00011925	1.03936
WBGene00000670	1.03491
WBGene00045416	1.02921
WBGene00022123	1.0287
WBGene00017952	1.01912
WBGene00013590	1.01088
WBGene00017422	1.00437
WBGene00010790	1.0035
WBGene00014057	1.00342

## Sheet: simr-1 25C gen1 down
Supplementary File 5, Sheet 4: mRNAs significantly down-regulated 2 fold or greater in simr-1 mutant animals at 25ºC for one generation.
Gene name	log2FoldChange
WBGene00000691	-8.70339
WBGene00020040	-7.13342
WBGene00011018	-6.03142
WBGene00018726	-6.00754
WBGene00017560	-5.99597
WBGene00009032	-5.77067
WBGene00014067	-5.6924
WBGene00011508	-5.59726
WBGene00011136	-5.56911
WBGene00018630	-5.46254
WBGene00044242	-5.43763
WBGene00010400	-5.43512
WBGene00011585	-5.43512
WBGene00001714	-5.3697
WBGene00020039	-5.25092
WBGene00008673	-5.23023
WBGene00010874	-5.22189
WBGene00016136	-5.1896
WBGene00013791	-5.1858
WBGene00015340	-5.18386
WBGene00000650	-5.17171
WBGene00015598	-5.15958
WBGene00019312	-5.12562
WBGene00194710	-5.12562
WBGene00011999	-5.1067
WBGene00017562	-5.07747
WBGene00138711	-5.05162
WBGene00044024	-5.04722
WBGene00009261	-5.02997
WBGene00011786	-5.02914
WBGene00018791	-5.02815
WBGene00011624	-5.02137
WBGene00005005	-4.98354
WBGene00007560	-4.96076
WBGene00008671	-4.95212
WBGene00015103	-4.93912
WBGene00006954	-4.93515
WBGene00010461	-4.92875
WBGene00018102	-4.92569
WBGene00008295	-4.89875
WBGene00006894	-4.86852
WBGene00009836	-4.85922
WBGene00009041	-4.85717
WBGene00007996	-4.80981
WBGene00008002	-4.80285
WBGene00008842	-4.8021
WBGene00013450	-4.80177
WBGene00013173	-4.75318
WBGene00020017	-4.73319
WBGene00020637	-4.73012
WBGene00019421	-4.71259
WBGene00013843	-4.70287
WBGene00010399	-4.67489
WBGene00011584	-4.67489
WBGene00014046	-4.66058
WBGene00018176	-4.64802
WBGene00077646	-4.63867
WBGene00020546	-4.6374
WBGene00000738	-4.63537
WBGene00016962	-4.62438
WBGene00012540	-4.61934
WBGene00000742	-4.60622
WBGene00010468	-4.56148
WBGene00010285	-4.54145
WBGene00017723	-4.54072
WBGene00235093	-4.53759
WBGene00015876	-4.53626
WBGene00018040	-4.52828
WBGene00009600	-4.51891
WBGene00010343	-4.51268
WBGene00011360	-4.50345
WBGene00044663	-4.50177
WBGene00022725	-4.49641
WBGene00195051	-4.48129
WBGene00202495	-4.44831
WBGene00044709	-4.44416
WBGene00007806	-4.43656
WBGene00022827	-4.41793
WBGene00022024	-4.40464
WBGene00000740	-4.40164
WBGene00202514	-4.38817
WBGene00000893	-4.38641
WBGene00022320	-4.3844
WBGene00235271	-4.37571
WBGene00015600	-4.37505
WBGene00001691	-4.34754
WBGene00012070	-4.33156
WBGene00000555	-4.33025
WBGene00019508	-4.32576
WBGene00015679	-4.3197
WBGene00019054	-4.30229
WBGene00044707	-4.30122
WBGene00014979	-4.29898
WBGene00001724	-4.29549
WBGene00002102	-4.28476
WBGene00012346	-4.27126
WBGene00007868	-4.27119
WBGene00011254	-4.26073
WBGene00019533	-4.25656
WBGene00017821	-4.25265
WBGene00019887	-4.24909
WBGene00044427	-4.24298
WBGene00022713	-4.24139
WBGene00011266	-4.22631
WBGene00017509	-4.2191
WBGene00017307	-4.21475
WBGene00007659	-4.21344
WBGene00011075	-4.21154
WBGene00003114	-4.20806
WBGene00020946	-4.20156
WBGene00009496	-4.19893
WBGene00044113	-4.19461
WBGene00018640	-4.17919
WBGene00017014	-4.1767
WBGene00010267	-4.17444
WBGene00019314	-4.17134
WBGene00235307	-4.16606
WBGene00006775	-4.15706
WBGene00010209	-4.1545
WBGene00086560	-4.15339
WBGene00016670	-4.14692
WBGene00004102	-4.14677
WBGene00016164	-4.14083
WBGene00077697	-4.13772
WBGene00206509	-4.13713
WBGene00010295	-4.12957
WBGene00005795	-4.12915
WBGene00077766	-4.11921
WBGene00015225	-4.11901
WBGene00010509	-4.11348
WBGene00045096	-4.10582
WBGene00007210	-4.09685
WBGene00008591	-4.09616
WBGene00044373	-4.09597
WBGene00016175	-4.09141
WBGene00044138	-4.07627
WBGene00001705	-4.07613
WBGene00022339	-4.06829
WBGene00002012	-4.06416
WBGene00012133	-4.05841
WBGene00001957	-4.05415
WBGene00011427	-4.04696
WBGene00003377	-4.03938
WBGene00045460	-4.03479
WBGene00020863	-4.02665
WBGene00016254	-4.00231
WBGene00017351	-4.00196
WBGene00011594	-3.99577
WBGene00014161	-3.98972
WBGene00005719	-3.98668
WBGene00008285	-3.98668
WBGene00044801	-3.98668
WBGene00044802	-3.98668
WBGene00086562	-3.98262
WBGene00008906	-3.9761
WBGene00235311	-3.9761
WBGene00008014	-3.95946
WBGene00010978	-3.94617
WBGene00000750	-3.94542
WBGene00018092	-3.94248
WBGene00019839	-3.93646
WBGene00206502	-3.92633
WBGene00009599	-3.90566
WBGene00018108	-3.89576
WBGene00021491	-3.89176
WBGene00019184	-3.88816
WBGene00007949	-3.88763
WBGene00015599	-3.88758
WBGene00010182	-3.87808
WBGene00001477	-3.86207
WBGene00015292	-3.85949
WBGene00235287	-3.85949
WBGene00016598	-3.8579
WBGene00020983	-3.85742
WBGene00008539	-3.85145
WBGene00044662	-3.85024
WBGene00020571	-3.81637
WBGene00007758	-3.80831
WBGene00044960	-3.79191
WBGene00012673	-3.79066
WBGene00005446	-3.78625
WBGene00016923	-3.76957
WBGene00012391	-3.76487
WBGene00000705	-3.74931
WBGene00009526	-3.74927
WBGene00020250	-3.74605
WBGene00019154	-3.73452
WBGene00015593	-3.73343
WBGene00010033	-3.72108
WBGene00019482	-3.71967
WBGene00017073	-3.71751
WBGene00008851	-3.71599
WBGene00011453	-3.70777
WBGene00016106	-3.7032
WBGene00022577	-3.69797
WBGene00001547	-3.69503
WBGene00019039	-3.69431
WBGene00007661	-3.69199
WBGene00014094	-3.68068
WBGene00015837	-3.6736
WBGene00012603	-3.66918
WBGene00018297	-3.64586
WBGene00013328	-3.64129
WBGene00044379	-3.63389
WBGene00017018	-3.63281
WBGene00044521	-3.62847
WBGene00009827	-3.6277
WBGene00011443	-3.62262
WBGene00235268	-3.6183
WBGene00017186	-3.61502
WBGene00021107	-3.61502
WBGene00000741	-3.6144
WBGene00020613	-3.61298
WBGene00017214	-3.61177
WBGene00014049	-3.61001
WBGene00007682	-3.6074
WBGene00015645	-3.59909
WBGene00009908	-3.59314
WBGene00004174	-3.58958
WBGene00007351	-3.56571
WBGene00000681	-3.55718
WBGene00020242	-3.55213
WBGene00014956	-3.55162
WBGene00008496	-3.54936
WBGene00044559	-3.54892
WBGene00010212	-3.54564
WBGene00050906	-3.53661
WBGene00008323	-3.52932
WBGene00013410	-3.52506
WBGene00189993	-3.52086
WBGene00044201	-3.51387
WBGene00013960	-3.51075
WBGene00022747	-3.51074
WBGene00009806	-3.51032
WBGene00000782	-3.50883
WBGene00015993	-3.49033
WBGene00020618	-3.46936
WBGene00015152	-3.46609
WBGene00002013	-3.46492
WBGene00019520	-3.46452
WBGene00002017	-3.46005
WBGene00005180	-3.45898
WBGene00001716	-3.45896
WBGene00194982	-3.4584
WBGene00018737	-3.44112
WBGene00194683	-3.44028
WBGene00013655	-3.43949
WBGene00012429	-3.42073
WBGene00001119	-3.41722
WBGene00044387	-3.41609
WBGene00008150	-3.4116
WBGene00004017	-3.41124
WBGene00019331	-3.40673
WBGene00010594	-3.40229
WBGene00007916	-3.39833
WBGene00022432	-3.39801
WBGene00007229	-3.37239
WBGene00010857	-3.3697
WBGene00008294	-3.36501
WBGene00018315	-3.36414
WBGene00020976	-3.36298
WBGene00020626	-3.35387
WBGene00016242	-3.3495
WBGene00007800	-3.34934
WBGene00010790	-3.34898
WBGene00009155	-3.34261
WBGene00044237	-3.34164
WBGene00044534	-3.33599
WBGene00012779	-3.31773
WBGene00219298	-3.31465
WBGene00004998	-3.30543
WBGene00009791	-3.30139
WBGene00013852	-3.28615
WBGene00018042	-3.28219
WBGene00008302	-3.2508
WBGene00202504	-3.24873
WBGene00019931	-3.24135
WBGene00194713	-3.24061
WBGene00000745	-3.23884
WBGene00005582	-3.23444
WBGene00020580	-3.23346
WBGene00000213	-3.23058
WBGene00008376	-3.22938
WBGene00006947	-3.22806
WBGene00002015	-3.21793
WBGene00006175	-3.2176
WBGene00009691	-3.20305
WBGene00175027	-3.19957
WBGene00021999	-3.19821
WBGene00005228	-3.19099
WBGene00017998	-3.18536
WBGene00005181	-3.17424
WBGene00206521	-3.17116
WBGene00045356	-3.15704
WBGene00018573	-3.14899
WBGene00045269	-3.1441
WBGene00044564	-3.14182
WBGene00001720	-3.14168
WBGene00004002	-3.13459
WBGene00017937	-3.12718
WBGene00044206	-3.12655
WBGene00012604	-3.11623
WBGene00009355	-3.11416
WBGene00000013	-3.10831
WBGene00008301	-3.10624
WBGene00003473	-3.1052
WBGene00007425	-3.10024
WBGene00044724	-3.09748
WBGene00012433	-3.09746
WBGene00016924	-3.09338
WBGene00002018	-3.09151
WBGene00044787	-3.08775
WBGene00009213	-3.08533
WBGene00044463	-3.07917
WBGene00015884	-3.07543
WBGene00021587	-3.07402
WBGene00021072	-3.07368
WBGene00011948	-3.06329
WBGene00044900	-3.06126
WBGene00002019	-3.05322
WBGene00002020	-3.05322
WBGene00013707	-3.052
WBGene00194985	-3.05094
WBGene00009916	-3.03845
WBGene00009520	-3.03399
WBGene00012878	-3.03322
WBGene00018345	-3.01324
WBGene00013493	-3.01151
WBGene00007174	-3.00737
WBGene00015339	-3.00257
WBGene00005206	-3.00218
WBGene00012255	-3.00143
WBGene00206388	-2.99147
WBGene00006948	-2.98546
WBGene00022570	-2.98139
WBGene00003888	-2.97768
WBGene00050899	-2.97598
WBGene00044212	-2.96052
WBGene00006538	-2.9512
WBGene00022215	-2.94433
WBGene00017267	-2.93347
WBGene00017270	-2.93347
WBGene00020326	-2.93088
WBGene00018169	-2.92585
WBGene00001476	-2.9234
WBGene00007264	-2.92274
WBGene00006666	-2.91708
WBGene00000720	-2.91566
WBGene00016017	-2.91166
WBGene00235296	-2.90328
WBGene00006766	-2.89691
WBGene00009467	-2.89691
WBGene00011175	-2.89546
WBGene00022189	-2.89534
WBGene00007132	-2.89179
WBGene00010717	-2.8881
WBGene00009001	-2.88042
WBGene00015934	-2.87963
WBGene00012594	-2.87737
WBGene00018209	-2.87669
WBGene00044239	-2.87195
WBGene00219296	-2.8684
WBGene00022790	-2.86262
WBGene00019236	-2.86059
WBGene00022179	-2.85422
WBGene00015605	-2.84802
WBGene00045415	-2.84731
WBGene00002016	-2.84715
WBGene00015537	-2.84267
WBGene00016718	-2.84135
WBGene00138721	-2.83932
WBGene00000853	-2.83888
WBGene00000535	-2.83505
WBGene00007883	-2.83152
WBGene00011328	-2.82821
WBGene00021389	-2.82208
WBGene00012257	-2.81927
WBGene00015504	-2.81592
WBGene00021873	-2.8151
WBGene00194717	-2.81425
WBGene00015224	-2.81235
WBGene00012032	-2.81082
WBGene00010686	-2.80538
WBGene00009438	-2.79377
WBGene00018487	-2.78979
WBGene00006008	-2.78747
WBGene00016659	-2.78551
WBGene00021121	-2.78481
WBGene00044719	-2.7819
WBGene00020033	-2.78093
WBGene00009983	-2.78047
WBGene00021581	-2.77862
WBGene00021081	-2.7767
WBGene00009779	-2.7731
WBGene00194902	-2.77148
WBGene00022038	-2.77144
WBGene00006380	-2.77131
WBGene00017716	-2.77126
WBGene00013856	-2.77024
WBGene00018568	-2.76776
WBGene00016568	-2.76517
WBGene00019906	-2.76462
WBGene00022596	-2.76031
WBGene00020509	-2.75975
WBGene00045401	-2.75736
WBGene00220261	-2.75335
WBGene00017813	-2.74346
WBGene00020663	-2.74142
WBGene00255420	-2.73999
WBGene00044510	-2.73413
WBGene00010219	-2.73314
WBGene00010830	-2.7324
WBGene00015596	-2.73214
WBGene00001075	-2.73127
WBGene00045208	-2.72965
WBGene00195145	-2.72878
WBGene00015388	-2.72725
WBGene00013897	-2.72263
WBGene00020083	-2.71733
WBGene00018224	-2.71324
WBGene00206483	-2.71115
WBGene00020125	-2.7111
WBGene00020362	-2.70822
WBGene00008858	-2.70694
WBGene00001670	-2.703
WBGene00000599	-2.70079
WBGene00019732	-2.69949
WBGene00002265	-2.69658
WBGene00017721	-2.69646
WBGene00044807	-2.6957
WBGene00004233	-2.69122
WBGene00020825	-2.68738
WBGene00008577	-2.68207
WBGene00017378	-2.68149
WBGene00019495	-2.67945
WBGene00000641	-2.67936
WBGene00010316	-2.67193
WBGene00020878	-2.66965
WBGene00011610	-2.66361
WBGene00012275	-2.6621
WBGene00045245	-2.65562
WBGene00044238	-2.65305
WBGene00023483	-2.65134
WBGene00022256	-2.6502
WBGene00021703	-2.64941
WBGene00012009	-2.64886
WBGene00044642	-2.64752
WBGene00015227	-2.64731
WBGene00044213	-2.64417
WBGene00007908	-2.64416
WBGene00020380	-2.63787
WBGene00015223	-2.63583
WBGene00000645	-2.63463
WBGene00206519	-2.63446
WBGene00001512	-2.63337
WBGene00015748	-2.62895
WBGene00011596	-2.62831
WBGene00000463	-2.62787
WBGene00009751	-2.62708
WBGene00001055	-2.62578
WBGene00000704	-2.62039
WBGene00012069	-2.61889
WBGene00189950	-2.61811
WBGene00018215	-2.61772
WBGene00011677	-2.61633
WBGene00018750	-2.61268
WBGene00007459	-2.61048
WBGene00017619	-2.60545
WBGene00012212	-2.60543
WBGene00004001	-2.60477
WBGene00000490	-2.60119
WBGene00004811	-2.60039
WBGene00012564	-2.58734
WBGene00016247	-2.58502
WBGene00044798	-2.57511
WBGene00018621	-2.57124
WBGene00044120	-2.57108
WBGene00011052	-2.56176
WBGene00009808	-2.55985
WBGene00022550	-2.55904
WBGene00001858	-2.557
WBGene00044536	-2.55544
WBGene00022789	-2.55132
WBGene00017836	-2.54898
WBGene00020560	-2.5484
WBGene00010293	-2.5374
WBGene00022504	-2.53184
WBGene00015549	-2.52789
WBGene00007404	-2.52649
WBGene00011314	-2.52142
WBGene00017991	-2.51661
WBGene00015062	-2.51544
WBGene00014245	-2.5151
WBGene00000932	-2.51503
WBGene00017539	-2.51474
WBGene00008522	-2.51386
WBGene00045188	-2.51189
WBGene00020774	-2.50867
WBGene00008215	-2.50736
WBGene00017303	-2.50735
WBGene00008712	-2.50131
WBGene00010881	-2.49998
WBGene00008507	-2.49019
WBGene00011161	-2.48774
WBGene00001551	-2.48676
WBGene00206530	-2.48144
WBGene00018273	-2.48004
WBGene00011021	-2.47757
WBGene00009292	-2.47732
WBGene00018384	-2.47577
WBGene00077490	-2.4753
WBGene00018352	-2.47081
WBGene00017122	-2.46881
WBGene00010222	-2.46829
WBGene00016088	-2.46823
WBGene00001730	-2.46779
WBGene00022415	-2.45788
WBGene00015055	-2.45615
WBGene00016805	-2.45122
WBGene00016733	-2.44885
WBGene00011278	-2.44843
WBGene00045473	-2.44536
WBGene00045251	-2.44187
WBGene00189995	-2.44108
WBGene00022517	-2.44001
WBGene00017034	-2.4393
WBGene00009541	-2.43776
WBGene00020016	-2.43367
WBGene00044806	-2.43288
WBGene00007694	-2.43206
WBGene00011551	-2.43107
WBGene00008655	-2.42892
WBGene00015139	-2.42413
WBGene00022096	-2.42394
WBGene00194644	-2.42363
WBGene00194658	-2.42333
WBGene00005833	-2.42305
WBGene00014175	-2.42248
WBGene00018188	-2.41882
WBGene00044783	-2.41669
WBGene00045412	-2.415
WBGene00004963	-2.41442
WBGene00020260	-2.4139
WBGene00012591	-2.40611
WBGene00016133	-2.40521
WBGene00016114	-2.40191
WBGene00022040	-2.39854
WBGene00004133	-2.39557
WBGene00013404	-2.39383
WBGene00007203	-2.39355
WBGene00009773	-2.39153
WBGene00020343	-2.38966
WBGene00010258	-2.38847
WBGene00018969	-2.38819
WBGene00015202	-2.38335
WBGene00010062	-2.38162
WBGene00010589	-2.37966
WBGene00016953	-2.37857
WBGene00018731	-2.37745
WBGene00044411	-2.37584
WBGene00235133	-2.37497
WBGene00001475	-2.37298
WBGene00020554	-2.36904
WBGene00017596	-2.36848
WBGene00044362	-2.36529
WBGene00009904	-2.36342
WBGene00002988	-2.36063
WBGene00017309	-2.35882
WBGene00022478	-2.3536
WBGene00011372	-2.35173
WBGene00010683	-2.35106
WBGene00008389	-2.3501
WBGene00001564	-2.34566
WBGene00010752	-2.34555
WBGene00270319	-2.34123
WBGene00017260	-2.34094
WBGene00010684	-2.33684
WBGene00018997	-2.33681
WBGene00008847	-2.33585
WBGene00010674	-2.33437
WBGene00045411	-2.33416
WBGene00019479	-2.33202
WBGene00020859	-2.33187
WBGene00016052	-2.33185
WBGene00003104	-2.331
WBGene00017277	-2.32954
WBGene00020943	-2.32734
WBGene00011957	-2.32569
WBGene00023501	-2.3246
WBGene00009780	-2.32246
WBGene00017420	-2.32217
WBGene00019416	-2.32212
WBGene00007919	-2.3215
WBGene00010432	-2.31944
WBGene00020229	-2.3151
WBGene00044623	-2.31431
WBGene00022061	-2.31271
WBGene00008916	-2.31226
WBGene00016080	-2.31138
WBGene00020205	-2.31049
WBGene00044395	-2.30722
WBGene00008605	-2.30461
WBGene00017153	-2.30305
WBGene00044220	-2.30123
WBGene00019591	-2.30119
WBGene00007992	-2.29863
WBGene00013761	-2.29554
WBGene00000955	-2.29344
WBGene00006952	-2.29175
WBGene00044761	-2.29173
WBGene00009895	-2.28862
WBGene00007375	-2.28798
WBGene00002128	-2.28758
WBGene00020737	-2.287
WBGene00019662	-2.28636
WBGene00044302	-2.28522
WBGene00044205	-2.2829
WBGene00016669	-2.28201
WBGene00000034	-2.28197
WBGene00017540	-2.28119
WBGene00009247	-2.28103
WBGene00043980	-2.27486
WBGene00021010	-2.27096
WBGene00044115	-2.27011
WBGene00015671	-2.26839
WBGene00000666	-2.26838
WBGene00023407	-2.26821
WBGene00014770	-2.2678
WBGene00005703	-2.26699
WBGene00044178	-2.26265
WBGene00003092	-2.26255
WBGene00014047	-2.2592
WBGene00206371	-2.25883
WBGene00013027	-2.25581
WBGene00000695	-2.25372
WBGene00010348	-2.24912
WBGene00000169	-2.24843
WBGene00016281	-2.24638
WBGene00219460	-2.24473
WBGene00019868	-2.24113
WBGene00044921	-2.23855
WBGene00003774	-2.23827
WBGene00015878	-2.23573
WBGene00007552	-2.23326
WBGene00219289	-2.23224
WBGene00016332	-2.23096
WBGene00016081	-2.22874
WBGene00001612	-2.22682
WBGene00044144	-2.2244
WBGene00020357	-2.22343
WBGene00194769	-2.22272
WBGene00021978	-2.21795
WBGene00000594	-2.21592
WBGene00016628	-2.21252
WBGene00019699	-2.21104
WBGene00010837	-2.20801
WBGene00018133	-2.20548
WBGene00235164	-2.20509
WBGene00022222	-2.20495
WBGene00017225	-2.20469
WBGene00044680	-2.20406
WBGene00013602	-2.20377
WBGene00015044	-2.20295
WBGene00009586	-2.20164
WBGene00010294	-2.20004
WBGene00044792	-2.19996
WBGene00016329	-2.19995
WBGene00008773	-2.19958
WBGene00020800	-2.1989
WBGene00017095	-2.19859
WBGene00022112	-2.19794
WBGene00002084	-2.19737
WBGene00015865	-2.19663
WBGene00015980	-2.19623
WBGene00010647	-2.19584
WBGene00006662	-2.1898
WBGene00021986	-2.18905
WBGene00023416	-2.18883
WBGene00015839	-2.18789
WBGene00001190	-2.18607
WBGene00001458	-2.18183
WBGene00009428	-2.18144
WBGene00004932	-2.18093
WBGene00219208	-2.18002
WBGene00017754	-2.17964
WBGene00189943	-2.17558
WBGene00020364	-2.17486
WBGene00044772	-2.17011
WBGene00011622	-2.16593
WBGene00000683	-2.16262
WBGene00021261	-2.16205
WBGene00011530	-2.16204
WBGene00003740	-2.16048
WBGene00001374	-2.15829
WBGene00010538	-2.15631
WBGene00021776	-2.15499
WBGene00022679	-2.15443
WBGene00020929	-2.15263
WBGene00077443	-2.15191
WBGene00020741	-2.14345
WBGene00008727	-2.14328
WBGene00044442	-2.14189
WBGene00004991	-2.14185
WBGene00015277	-2.14168
WBGene00017191	-2.14168
WBGene00019113	-2.14119
WBGene00021204	-2.14045
WBGene00004211	-2.14028
WBGene00017698	-2.14024
WBGene00009060	-2.13957
WBGene00235092	-2.13458
WBGene00000046	-2.132
WBGene00022441	-2.13069
WBGene00021434	-2.12965
WBGene00006531	-2.12957
WBGene00006539	-2.12696
WBGene00007497	-2.12572
WBGene00017258	-2.12469
WBGene00002085	-2.12397
WBGene00021463	-2.12338
WBGene00015370	-2.1227
WBGene00009560	-2.122
WBGene00206524	-2.11946
WBGene00019426	-2.11894
WBGene00009805	-2.11872
WBGene00012237	-2.11634
WBGene00011104	-2.11609
WBGene00007563	-2.11607
WBGene00022479	-2.11578
WBGene00007551	-2.11535
WBGene00013837	-2.11459
WBGene00016193	-2.11246
WBGene00012256	-2.10812
WBGene00014052	-2.10569
WBGene00018470	-2.10466
WBGene00012261	-2.10399
WBGene00011321	-2.10372
WBGene00009969	-2.10101
WBGene00004155	-2.09985
WBGene00011380	-2.09966
WBGene00001577	-2.09965
WBGene00022572	-2.09905
WBGene00018748	-2.09869
WBGene00007899	-2.09808
WBGene00018803	-2.09743
WBGene00022454	-2.09641
WBGene00022597	-2.09503
WBGene00019368	-2.09328
WBGene00045456	-2.09325
WBGene00010375	-2.08873
WBGene00044382	-2.08812
WBGene00195011	-2.08778
WBGene00007370	-2.08675
WBGene00017193	-2.08502
WBGene00007131	-2.08262
WBGene00002188	-2.08216
WBGene00017197	-2.08164
WBGene00019780	-2.08154
WBGene00005133	-2.08102
WBGene00013579	-2.07913
WBGene00011997	-2.07781
WBGene00017659	-2.07576
WBGene00009029	-2.07555
WBGene00003885	-2.0755
WBGene00006744	-2.07253
WBGene00194651	-2.07208
WBGene00015785	-2.07121
WBGene00012383	-2.07054
WBGene00009692	-2.068
WBGene00003553	-2.06654
WBGene00007181	-2.06447
WBGene00022562	-2.06384
WBGene00018763	-2.05999
WBGene00022083	-2.05985
WBGene00011213	-2.05743
WBGene00021253	-2.05686
WBGene00009226	-2.05624
WBGene00013008	-2.05566
WBGene00002094	-2.05504
WBGene00017382	-2.05495
WBGene00008862	-2.05454
WBGene00044479	-2.0534
WBGene00001989	-2.05313
WBGene00009296	-2.05144
WBGene00001500	-2.05021
WBGene00008850	-2.04841
WBGene00020617	-2.04825
WBGene00007962	-2.04783
WBGene00003755	-2.04411
WBGene00086568	-2.03675
WBGene00008045	-2.03504
WBGene00043053	-2.03459
WBGene00018906	-2.03433
WBGene00015969	-2.02942
WBGene00015597	-2.02933
WBGene00012961	-2.02863
WBGene00019859	-2.02742
WBGene00019549	-2.02684
WBGene00005113	-2.02487
WBGene00206475	-2.02074
WBGene00007288	-2.02016
WBGene00008977	-2.01846
WBGene00011397	-2.01843
WBGene00015964	-2.0176
WBGene00019472	-2.01487
WBGene00000242	-2.01456
WBGene00015045	-2.01285
WBGene00022349	-2.00959
WBGene00017434	-2.00836
WBGene00008863	-2.00596
WBGene00018242	-2.00461
WBGene00015828	-2.00321
WBGene00009130	-2.00176
WBGene00003515	-2.00171
WBGene00044446	-2.00151
WBGene00019272	-2.00081
WBGene00018103	-1.99809
WBGene00206361	-1.99489
WBGene00014055	-1.99434
WBGene00189952	-1.99317
WBGene00017361	-1.99029
WBGene00008626	-1.98994
WBGene00012572	-1.98958
WBGene00017334	-1.98867
WBGene00004993	-1.98862
WBGene00010768	-1.98843
WBGene00010150	-1.98569
WBGene00044284	-1.9848
WBGene00003249	-1.98425
WBGene00015781	-1.98404
WBGene00021002	-1.98253
WBGene00011682	-1.98223
WBGene00018641	-1.97938
WBGene00018738	-1.97936
WBGene00013975	-1.97679
WBGene00002067	-1.97638
WBGene00018047	-1.97626
WBGene00001984	-1.97613
WBGene00009291	-1.97612
WBGene00005523	-1.97439
WBGene00001884	-1.97418
WBGene00001888	-1.97418
WBGene00001900	-1.97418
WBGene00017291	-1.97312
WBGene00022821	-1.97259
WBGene00005408	-1.97107
WBGene00022324	-1.9704
WBGene00021589	-1.97005
WBGene00008113	-1.96875
WBGene00007365	-1.9685
WBGene00015936	-1.96842
WBGene00004300	-1.96496
WBGene00006522	-1.96421
WBGene00206374	-1.9632
WBGene00017421	-1.96026
WBGene00194849	-1.95906
WBGene00020700	-1.9585
WBGene00006809	-1.95604
WBGene00019923	-1.9551
WBGene00002086	-1.95476
WBGene00002052	-1.95438
WBGene00010714	-1.95357
WBGene00011928	-1.95259
WBGene00019703	-1.95218
WBGene00009803	-1.95214
WBGene00021263	-1.95123
WBGene00164973	-1.94966
WBGene00022633	-1.94952
WBGene00008593	-1.94931
WBGene00009239	-1.94822
WBGene00003778	-1.94779
WBGene00020881	-1.94769
WBGene00219325	-1.94754
WBGene00017634	-1.94752
WBGene00044066	-1.94703
WBGene00077539	-1.94612
WBGene00044350	-1.94571
WBGene00012822	-1.94512
WBGene00001395	-1.94459
WBGene00016700	-1.94426
WBGene00001052	-1.94304
WBGene00044665	-1.9421
WBGene00015371	-1.94032
WBGene00012440	-1.93941
WBGene00018749	-1.93867
WBGene00013295	-1.93677
WBGene00195241	-1.93657
WBGene00044773	-1.9344
WBGene00022575	-1.93382
WBGene00018874	-1.93291
WBGene00007152	-1.92779
WBGene00015613	-1.92775
WBGene00005640	-1.92684
WBGene00003237	-1.92659
WBGene00009381	-1.92621
WBGene00003775	-1.9258
WBGene00015264	-1.92525
WBGene00269392	-1.92184
WBGene00013527	-1.92087
WBGene00021543	-1.92023
WBGene00000560	-1.9187
WBGene00017466	-1.91842
WBGene00010174	-1.91689
WBGene00044687	-1.91575
WBGene00011927	-1.91263
WBGene00011130	-1.91236
WBGene00013704	-1.91172
WBGene00021625	-1.90636
WBGene00012867	-1.90599
WBGene00003779	-1.90495
WBGene00008519	-1.90489
WBGene00013900	-1.90342
WBGene00016359	-1.90254
WBGene00006545	-1.90131
WBGene00010784	-1.90074
WBGene00012278	-1.89914
WBGene00004986	-1.89803
WBGene00022382	-1.897
WBGene00014178	-1.89643
WBGene00044484	-1.89615
WBGene00008392	-1.895
WBGene00012448	-1.89469
WBGene00012629	-1.89411
WBGene00006627	-1.89392
WBGene00020616	-1.89158
WBGene00017529	-1.88955
WBGene00023247	-1.88916
WBGene00015602	-1.88902
WBGene00007973	-1.88865
WBGene00013752	-1.88859
WBGene00007397	-1.88851
WBGene00013859	-1.88607
WBGene00015046	-1.88392
WBGene00194670	-1.87891
WBGene00022283	-1.87761
WBGene00013583	-1.87716
WBGene00044737	-1.87651
WBGene00016728	-1.87596
WBGene00044607	-1.8755
WBGene00077593	-1.87529
WBGene00045400	-1.87396
WBGene00021984	-1.87327
WBGene00012444	-1.87258
WBGene00010065	-1.872
WBGene00014200	-1.871
WBGene00013531	-1.87069
WBGene00008023	-1.86932
WBGene00011675	-1.86908
WBGene00010448	-1.86782
WBGene00004219	-1.8675
WBGene00013613	-1.86306
WBGene00016911	-1.86296
WBGene00012135	-1.86291
WBGene00003167	-1.86263
WBGene00016870	-1.86194
WBGene00021019	-1.86012
WBGene00022314	-1.85986
WBGene00022698	-1.85974
WBGene00017266	-1.85915
WBGene00007044	-1.85808
WBGene00009743	-1.85744
WBGene00003644	-1.85734
WBGene00194641	-1.85426
WBGene00019109	-1.85378
WBGene00019171	-1.85346
WBGene00013715	-1.85332
WBGene00044953	-1.85167
WBGene00006611	-1.85137
WBGene00020183	-1.84923
WBGene00007958	-1.84856
WBGene00020854	-1.84835
WBGene00000037	-1.84626
WBGene00011475	-1.84603
WBGene00045392	-1.84565
WBGene00044500	-1.84539
WBGene00017535	-1.84471
WBGene00010242	-1.8434
WBGene00010442	-1.843
WBGene00000690	-1.8417
WBGene00045238	-1.84011
WBGene00022843	-1.83902
WBGene00018101	-1.83881
WBGene00007409	-1.83647
WBGene00017127	-1.83637
WBGene00014002	-1.83531
WBGene00009033	-1.83436
WBGene00020011	-1.83397
WBGene00023486	-1.83334
WBGene00008255	-1.83227
WBGene00015753	-1.82797
WBGene00001613	-1.82792
WBGene00077558	-1.82634
WBGene00017054	-1.82456
WBGene00004910	-1.82365
WBGene00077525	-1.82292
WBGene00007200	-1.82093
WBGene00013649	-1.82053
WBGene00013455	-1.81986
WBGene00023069	-1.81906
WBGene00023423	-1.8183
WBGene00021875	-1.81663
WBGene00017312	-1.81457
WBGene00017146	-1.81406
WBGene00269382	-1.8134
WBGene00015355	-1.81314
WBGene00019284	-1.8125
WBGene00011060	-1.81185
WBGene00019779	-1.81067
WBGene00009192	-1.80995
WBGene00008234	-1.80777
WBGene00003578	-1.80773
WBGene00012783	-1.8072
WBGene00009590	-1.80537
WBGene00044901	-1.80534
WBGene00043050	-1.80521
WBGene00017823	-1.80507
WBGene00000603	-1.80497
WBGene00017835	-1.80478
WBGene00008597	-1.80352
WBGene00021079	-1.80351
WBGene00010109	-1.80276
WBGene00007999	-1.80141
WBGene00011097	-1.80054
WBGene00012178	-1.80013
WBGene00016894	-1.79851
WBGene00018213	-1.7982
WBGene00021624	-1.79617
WBGene00007748	-1.79551
WBGene00235094	-1.79466
WBGene00010516	-1.79448
WBGene00007506	-1.79371
WBGene00016657	-1.79193
WBGene00010649	-1.79153
WBGene00018839	-1.79059
WBGene00011798	-1.79009
WBGene00013091	-1.7892
WBGene00015610	-1.78887
WBGene00017654	-1.78835
WBGene00001108	-1.78826
WBGene00010084	-1.78782
WBGene00007420	-1.78757
WBGene00000478	-1.78576
WBGene00001113	-1.78559
WBGene00013181	-1.78552
WBGene00015618	-1.78532
WBGene00003094	-1.78529
WBGene00009325	-1.78327
WBGene00006852	-1.78225
WBGene00000188	-1.78115
WBGene00017440	-1.78109
WBGene00019782	-1.78076
WBGene00019204	-1.78024
WBGene00006783	-1.77861
WBGene00009157	-1.77823
WBGene00006980	-1.7754
WBGene00000616	-1.7753
WBGene00009476	-1.77174
WBGene00012824	-1.77008
WBGene00000625	-1.76828
WBGene00011099	-1.76789
WBGene00044705	-1.76775
WBGene00010342	-1.7665
WBGene00009778	-1.76589
WBGene00007755	-1.76384
WBGene00013399	-1.76367
WBGene00010573	-1.7628
WBGene00017438	-1.75741
WBGene00010440	-1.75679
WBGene00235315	-1.75496
WBGene00000170	-1.75484
WBGene00206364	-1.75455
WBGene00002118	-1.75428
WBGene00195073	-1.75413
WBGene00003966	-1.75175
WBGene00009804	-1.75171
WBGene00018654	-1.75138
WBGene00022275	-1.75124
WBGene00009393	-1.75046
WBGene00015293	-1.75011
WBGene00015633	-1.74961
WBGene00001990	-1.74941
WBGene00013899	-1.74934
WBGene00007808	-1.74931
WBGene00022332	-1.749
WBGene00044660	-1.74855
WBGene00003753	-1.74717
WBGene00014164	-1.74654
WBGene00021338	-1.74654
WBGene00003689	-1.7465
WBGene00016146	-1.74564
WBGene00009887	-1.7454
WBGene00016958	-1.74452
WBGene00008929	-1.74415
WBGene00001772	-1.74339
WBGene00194815	-1.74315
WBGene00006761	-1.74284
WBGene00010613	-1.74239
WBGene00016099	-1.7422
WBGene00022612	-1.741
WBGene00008168	-1.7407
WBGene00012381	-1.73741
WBGene00009702	-1.73608
WBGene00010977	-1.73497
WBGene00044753	-1.73436
WBGene00019547	-1.73354
WBGene00009304	-1.73033
WBGene00001623	-1.72916
WBGene00011042	-1.72902
WBGene00044401	-1.72858
WBGene00018600	-1.72833
WBGene00012399	-1.7268
WBGene00000503	-1.72447
WBGene00017541	-1.72413
WBGene00005271	-1.72399
WBGene00004740	-1.72211
WBGene00235352	-1.72132
WBGene00015216	-1.71866
WBGene00015376	-1.71751
WBGene00017747	-1.71579
WBGene00010587	-1.71565
WBGene00017600	-1.71564
WBGene00020325	-1.71533
WBGene00010508	-1.71528
WBGene00206382	-1.71336
WBGene00007357	-1.71328
WBGene00003380	-1.71295
WBGene00194687	-1.71234
WBGene00021598	-1.70957
WBGene00008572	-1.7082
WBGene00001076	-1.70753
WBGene00044799	-1.7075
WBGene00018311	-1.70644
WBGene00006864	-1.70598
WBGene00019575	-1.70521
WBGene00001883	-1.70387
WBGene00001887	-1.70387
WBGene00044509	-1.70375
WBGene00018343	-1.70021
WBGene00044287	-1.70019
WBGene00018346	-1.70012
WBGene00017308	-1.69975
WBGene00008359	-1.69902
WBGene00001947	-1.69829
WBGene00001805	-1.69765
WBGene00011926	-1.69728
WBGene00013334	-1.69728
WBGene00012452	-1.69701
WBGene00012450	-1.69641
WBGene00016556	-1.69628
WBGene00195185	-1.69606
WBGene00045013	-1.69338
WBGene00008229	-1.69094
WBGene00003768	-1.69081
WBGene00009964	-1.69074
WBGene00012107	-1.68929
WBGene00008926	-1.68838
WBGene00021819	-1.68803
WBGene00010680	-1.68783
WBGene00009835	-1.68628
WBGene00194695	-1.68587
WBGene00013637	-1.68533
WBGene00018579	-1.68501
WBGene00005931	-1.6845
WBGene00194708	-1.6833
WBGene00006637	-1.68171
WBGene00011672	-1.68142
WBGene00050913	-1.68123
WBGene00010072	-1.681
WBGene00018307	-1.68097
WBGene00013962	-1.68084
WBGene00015729	-1.68056
WBGene00006633	-1.67986
WBGene00009125	-1.67984
WBGene00021862	-1.67891
WBGene00202501	-1.67799
WBGene00013841	-1.67761
WBGene00011473	-1.6767
WBGene00050914	-1.67592
WBGene00077531	-1.67536
WBGene00009700	-1.67455
WBGene00018807	-1.67438
WBGene00050927	-1.67428
WBGene00020801	-1.67194
WBGene00011437	-1.67153
WBGene00019320	-1.67149
WBGene00000451	-1.6713
WBGene00012605	-1.6712
WBGene00022538	-1.67084
WBGene00022797	-1.66822
WBGene00001890	-1.66776
WBGene00017893	-1.66763
WBGene00044078	-1.6652
WBGene00019921	-1.66488
WBGene00017868	-1.66465
WBGene00010539	-1.66452
WBGene00012588	-1.66376
WBGene00006464	-1.66317
WBGene00006226	-1.66281
WBGene00022615	-1.66273
WBGene00019148	-1.6617
WBGene00016217	-1.66102
WBGene00007414	-1.66076
WBGene00013079	-1.66036
WBGene00008709	-1.66019
WBGene00018314	-1.65974
WBGene00022325	-1.65956
WBGene00016625	-1.659
WBGene00175035	-1.65763
WBGene00015287	-1.6566
WBGene00019105	-1.65644
WBGene00003539	-1.65628
WBGene00007495	-1.65522
WBGene00008277	-1.65437
WBGene00022392	-1.65423
WBGene00009984	-1.65372
WBGene00044035	-1.6536
WBGene00007957	-1.65183
WBGene00016596	-1.65111
WBGene00003850	-1.65067
WBGene00012839	-1.65021
WBGene00008357	-1.65006
WBGene00001852	-1.6487
WBGene00044505	-1.64827
WBGene00017243	-1.64798
WBGene00020849	-1.64675
WBGene00020192	-1.64669
WBGene00016319	-1.64539
WBGene00235353	-1.64445
WBGene00021417	-1.64369
WBGene00023451	-1.64326
WBGene00044132	-1.64284
WBGene00018005	-1.64256
WBGene00013891	-1.64242
WBGene00020200	-1.64237
WBGene00045261	-1.64224
WBGene00014159	-1.64127
WBGene00008220	-1.64114
WBGene00044349	-1.64108
WBGene00012764	-1.64074
WBGene00001828	-1.63831
WBGene00007440	-1.63653
WBGene00008598	-1.63483
WBGene00005018	-1.63419
WBGene00001440	-1.63367
WBGene00001519	-1.63294
WBGene00045212	-1.63281
WBGene00017072	-1.63267
WBGene00017362	-1.63263
WBGene00021163	-1.63241
WBGene00016681	-1.63169
WBGene00009509	-1.63159
WBGene00009623	-1.63075
WBGene00004949	-1.62851
WBGene00015335	-1.62848
WBGene00016276	-1.62776
WBGene00004225	-1.62631
WBGene00017292	-1.62555
WBGene00021256	-1.624
WBGene00009158	-1.6225
WBGene00000687	-1.62189
WBGene00008970	-1.62183
WBGene00044280	-1.62159
WBGene00018286	-1.62014
WBGene00017582	-1.61992
WBGene00001188	-1.61984
WBGene00044728	-1.61922
WBGene00000902	-1.6186
WBGene00017677	-1.61774
WBGene00003747	-1.61767
WBGene00006632	-1.61744
WBGene00014173	-1.61666
WBGene00001464	-1.61591
WBGene00009091	-1.61497
WBGene00020566	-1.61454
WBGene00001366	-1.61427
WBGene00013046	-1.61292
WBGene00007393	-1.61275
WBGene00022548	-1.61219
WBGene00000711	-1.61194
WBGene00013585	-1.6117
WBGene00020675	-1.61167
WBGene00010224	-1.61107
WBGene00012593	-1.61083
WBGene00001523	-1.60979
WBGene00021272	-1.60912
WBGene00019478	-1.60904
WBGene00000493	-1.60841
WBGene00011362	-1.60762
WBGene00000789	-1.60755
WBGene00004120	-1.60726
WBGene00000951	-1.6064
WBGene00009295	-1.60626
WBGene00000664	-1.60548
WBGene00021164	-1.60515
WBGene00003998	-1.60493
WBGene00000438	-1.60145
WBGene00013104	-1.60065
WBGene00009578	-1.59905
WBGene00017861	-1.59904
WBGene00004921	-1.59884
WBGene00005657	-1.59768
WBGene00009965	-1.59736
WBGene00016345	-1.59731
WBGene00007253	-1.59474
WBGene00011608	-1.59468
WBGene00194643	-1.59436
WBGene00019174	-1.59335
WBGene00013934	-1.59327
WBGene00017576	-1.5932
WBGene00010385	-1.59304
WBGene00008760	-1.59257
WBGene00016666	-1.59195
WBGene00017595	-1.59106
WBGene00011317	-1.58957
WBGene00004139	-1.58945
WBGene00008360	-1.58941
WBGene00012398	-1.58857
WBGene00014755	-1.58691
WBGene00007007	-1.58658
WBGene00010742	-1.58635
WBGene00003859	-1.58416
WBGene00005548	-1.58407
WBGene00008038	-1.58376
WBGene00020449	-1.58312
WBGene00016456	-1.58305
WBGene00011726	-1.5823
WBGene00011495	-1.58105
WBGene00044530	-1.5798
WBGene00001672	-1.57783
WBGene00018036	-1.57781
WBGene00045414	-1.5777
WBGene00016893	-1.57706
WBGene00009816	-1.57567
WBGene00010769	-1.57559
WBGene00012224	-1.57481
WBGene00000601	-1.57365
WBGene00021167	-1.57345
WBGene00001107	-1.57344
WBGene00020386	-1.57298
WBGene00018295	-1.57289
WBGene00020861	-1.57069
WBGene00021339	-1.56924
WBGene00008036	-1.56903
WBGene00044283	-1.56841
WBGene00021505	-1.56797
WBGene00004825	-1.56732
WBGene00011019	-1.56645
WBGene00013516	-1.56549
WBGene00006987	-1.56471
WBGene00009903	-1.56461
WBGene00006863	-1.56211
WBGene00001664	-1.56192
WBGene00008482	-1.56134
WBGene00044256	-1.56099
WBGene00016028	-1.56048
WBGene00009333	-1.55978
WBGene00000086	-1.5587
WBGene00016795	-1.55757
WBGene00019932	-1.55653
WBGene00008543	-1.55633
WBGene00044021	-1.55464
WBGene00020689	-1.55443
WBGene00008177	-1.55427
WBGene00011261	-1.55414
WBGene00206522	-1.55317
WBGene00011539	-1.55245
WBGene00010585	-1.55197
WBGene00009394	-1.5517
WBGene00018696	-1.55113
WBGene00015395	-1.55087
WBGene00001899	-1.54997
WBGene00020574	-1.54989
WBGene00004183	-1.5493
WBGene00003969	-1.54924
WBGene00013013	-1.54744
WBGene00077762	-1.54738
WBGene00003767	-1.54684
WBGene00010661	-1.54602
WBGene00008401	-1.54585
WBGene00017418	-1.54545
WBGene00016817	-1.54524
WBGene00010655	-1.54416
WBGene00012821	-1.54342
WBGene00019068	-1.54165
WBGene00018702	-1.54152
WBGene00006985	-1.54005
WBGene00003565	-1.5399
WBGene00018376	-1.53868
WBGene00009018	-1.53777
WBGene00007458	-1.53735
WBGene00007953	-1.53728
WBGene00000277	-1.53683
WBGene00016684	-1.53475
WBGene00010183	-1.53387
WBGene00013352	-1.53312
WBGene00007660	-1.53272
WBGene00002270	-1.53188
WBGene00206536	-1.5315
WBGene00007832	-1.53109
WBGene00044756	-1.53073
WBGene00018097	-1.53073
WBGene00077783	-1.5302
WBGene00007313	-1.53014
WBGene00020021	-1.52848
WBGene00020201	-1.52847
WBGene00003376	-1.52832
WBGene00007937	-1.52761
WBGene00019117	-1.5271
WBGene00016719	-1.52655
WBGene00016071	-1.52624
WBGene00007340	-1.52623
WBGene00013542	-1.52523
WBGene00020157	-1.52516
WBGene00010256	-1.52406
WBGene00021369	-1.52388
WBGene00010223	-1.52382
WBGene00019840	-1.52333
WBGene00004401	-1.52326
WBGene00012225	-1.5232
WBGene00194848	-1.52219
WBGene00015014	-1.52199
WBGene00016555	-1.52187
WBGene00012191	-1.52162
WBGene00010870	-1.52155
WBGene00010835	-1.52154
WBGene00020363	-1.52067
WBGene00044418	-1.52038
WBGene00021979	-1.52035
WBGene00044553	-1.5199
WBGene00014053	-1.51815
WBGene00013574	-1.51774
WBGene00018576	-1.51765
WBGene00044301	-1.5175
WBGene00023432	-1.51679
WBGene00012134	-1.51668
WBGene00009457	-1.51558
WBGene00010273	-1.51514
WBGene00000435	-1.51345
WBGene00077781	-1.51338
WBGene00011235	-1.5126
WBGene00008226	-1.51106
WBGene00219283	-1.51057
WBGene00008246	-1.51052
WBGene00022571	-1.51039
WBGene00019998	-1.51035
WBGene00018260	-1.50984
WBGene00007302	-1.50983
WBGene00012297	-1.50907
WBGene00010488	-1.50899
WBGene00010491	-1.50873
WBGene00010239	-1.50846
WBGene00013275	-1.50774
WBGene00013842	-1.50724
WBGene00017592	-1.50656
WBGene00012289	-1.5061
WBGene00001461	-1.50523
WBGene00016757	-1.50521
WBGene00017306	-1.50454
WBGene00195176	-1.50405
WBGene00020579	-1.50289
WBGene00003987	-1.50234
WBGene00018787	-1.50233
WBGene00044303	-1.50193
WBGene00016135	-1.50159
WBGene00000219	-1.50124
WBGene00206415	-1.49985
WBGene00001064	-1.4995
WBGene00021529	-1.4994
WBGene00015262	-1.49937
WBGene00017755	-1.49885
WBGene00010898	-1.49786
WBGene00010871	-1.49744
WBGene00012554	-1.49713
WBGene00006984	-1.49619
WBGene00012959	-1.49605
WBGene00006470	-1.49574
WBGene00010540	-1.49536
WBGene00005188	-1.49454
WBGene00010299	-1.49357
WBGene00009839	-1.49095
WBGene00006970	-1.49045
WBGene00009268	-1.48978
WBGene00002030	-1.48974
WBGene00015574	-1.48955
WBGene00000286	-1.48915
WBGene00011774	-1.48898
WBGene00077775	-1.48859
WBGene00019507	-1.4882
WBGene00050920	-1.48813
WBGene00006163	-1.48789
WBGene00016626	-1.48708
WBGene00003839	-1.48628
WBGene00006983	-1.48393
WBGene00021340	-1.48349
WBGene00003828	-1.4834
WBGene00018562	-1.48296
WBGene00012101	-1.48256
WBGene00020912	-1.48247
WBGene00008130	-1.4819
WBGene00008368	-1.48153
WBGene00015829	-1.48049
WBGene00011429	-1.48021
WBGene00045038	-1.47989
WBGene00002233	-1.47914
WBGene00077636	-1.47896
WBGene00001644	-1.47853
WBGene00006614	-1.47635
WBGene00015935	-1.4756
WBGene00007139	-1.47544
WBGene00011762	-1.47534
WBGene00044977	-1.4752
WBGene00020528	-1.47362
WBGene00021111	-1.47333
WBGene00000367	-1.47319
WBGene00021643	-1.47246
WBGene00003700	-1.47232
WBGene00020047	-1.47113
WBGene00003746	-1.47061
WBGene00007652	-1.47057
WBGene00045461	-1.47051
WBGene00044342	-1.47043
WBGene00021691	-1.46889
WBGene00012589	-1.46845
WBGene00022330	-1.46731
WBGene00019415	-1.46729
WBGene00001452	-1.46728
WBGene00219297	-1.46677
WBGene00019763	-1.46606
WBGene00011561	-1.46589
WBGene00014090	-1.46578
WBGene00013964	-1.46549
WBGene00003745	-1.46491
WBGene00000476	-1.46452
WBGene00018200	-1.46407
WBGene00021493	-1.46272
WBGene00017100	-1.46267
WBGene00022017	-1.46106
WBGene00015220	-1.46103
WBGene00011154	-1.46049
WBGene00002069	-1.46038
WBGene00000739	-1.46019
WBGene00020786	-1.45994
WBGene00018517	-1.45861
WBGene00006741	-1.45715
WBGene00019675	-1.45654
WBGene00022039	-1.45618
WBGene00015328	-1.45613
WBGene00013335	-1.4542
WBGene00044515	-1.45237
WBGene00004169	-1.45228
WBGene00011821	-1.45149
WBGene00017449	-1.45127
WBGene00021048	-1.45124
WBGene00006495	-1.45109
WBGene00013746	-1.4509
WBGene00044723	-1.45082
WBGene00023490	-1.44938
WBGene00021271	-1.44931
WBGene00015012	-1.44901
WBGene00004898	-1.44882
WBGene00000584	-1.44822
WBGene00009194	-1.44605
WBGene00019705	-1.44558
WBGene00019750	-1.44523
WBGene00001953	-1.44501
WBGene00009660	-1.44446
WBGene00011101	-1.44312
WBGene00007901	-1.44248
WBGene00017205	-1.44174
WBGene00000009	-1.44171
WBGene00009901	-1.44162
WBGene00017838	-1.44098
WBGene00008451	-1.4409
WBGene00016788	-1.44065
WBGene00018195	-1.44044
WBGene00011763	-1.43896
WBGene00020323	-1.4381
WBGene00016064	-1.438
WBGene00004232	-1.43726
WBGene00020699	-1.43697
WBGene00012013	-1.43629
WBGene00014074	-1.43607
WBGene00017429	-1.43602
WBGene00017866	-1.43576
WBGene00000719	-1.43569
WBGene00017427	-1.43549
WBGene00008454	-1.43444
WBGene00219329	-1.43381
WBGene00016310	-1.43299
WBGene00013750	-1.43234
WBGene00019655	-1.43122
WBGene00016738	-1.43064
WBGene00018225	-1.43061
WBGene00043983	-1.43019
WBGene00017841	-1.42937
WBGene00009331	-1.42899
WBGene00010727	-1.42851
WBGene00017597	-1.42796
WBGene00018561	-1.42772
WBGene00015294	-1.42724
WBGene00011705	-1.42714
WBGene00008603	-1.42686
WBGene00020358	-1.42683
WBGene00015052	-1.42609
WBGene00022144	-1.42607
WBGene00000138	-1.42575
WBGene00000220	-1.42479
WBGene00000950	-1.4246
WBGene00008388	-1.42351
WBGene00016976	-1.42322
WBGene00019988	-1.42294
WBGene00001398	-1.42174
WBGene00010475	-1.42153
WBGene00016119	-1.42122
WBGene00013009	-1.42039
WBGene00018724	-1.42025
WBGene00021668	-1.41988
WBGene00011587	-1.41963
WBGene00008309	-1.41947
WBGene00013266	-1.41928
WBGene00012487	-1.41906
WBGene00013315	-1.41799
WBGene00003075	-1.41664
WBGene00013959	-1.41537
WBGene00007531	-1.41504
WBGene00020736	-1.41481
WBGene00044686	-1.4146
WBGene00017304	-1.41394
WBGene00007950	-1.41378
WBGene00010610	-1.41366
WBGene00021435	-1.41336
WBGene00020649	-1.41117
WBGene00014134	-1.41005
WBGene00016762	-1.40994
WBGene00045457	-1.40936
WBGene00013848	-1.4085
WBGene00021865	-1.40773
WBGene00006055	-1.40738
WBGene00002222	-1.40698
WBGene00003166	-1.4061
WBGene00003968	-1.40604
WBGene00044743	-1.40506
WBGene00007726	-1.40481
WBGene00016191	-1.40429
WBGene00019902	-1.40394
WBGene00017660	-1.40373
WBGene00003617	-1.40367
WBGene00010424	-1.40336
WBGene00006746	-1.40275
WBGene00009215	-1.40255
WBGene00021601	-1.40138
WBGene00018274	-1.40135
WBGene00015337	-1.40109
WBGene00019205	-1.40096
WBGene00018913	-1.40077
WBGene00269355	-1.40031
WBGene00014008	-1.39995
WBGene00000370	-1.39976
WBGene00045215	-1.39819
WBGene00008358	-1.39738
WBGene00011428	-1.39628
WBGene00004988	-1.3954
WBGene00014150	-1.39485
WBGene00019170	-1.39468
WBGene00008462	-1.39395
WBGene00008971	-1.39387
WBGene00007304	-1.39353
WBGene00000692	-1.39339
WBGene00008341	-1.39288
WBGene00001898	-1.3922
WBGene00000054	-1.39212
WBGene00015455	-1.39199
WBGene00008453	-1.39128
WBGene00015471	-1.39073
WBGene00006372	-1.38969
WBGene00004933	-1.38967
WBGene00022397	-1.38894
WBGene00220259	-1.38867
WBGene00019649	-1.38867
WBGene00013969	-1.38836
WBGene00019589	-1.38779
WBGene00008065	-1.38715
WBGene00003029	-1.38653
WBGene00006649	-1.38639
WBGene00017936	-1.38634
WBGene00022396	-1.38577
WBGene00011293	-1.38569
WBGene00010179	-1.38537
WBGene00020309	-1.38517
WBGene00007260	-1.38503
WBGene00001158	-1.38362
WBGene00007745	-1.38297
WBGene00001460	-1.38255
WBGene00009400	-1.38245
WBGene00016292	-1.38159
WBGene00020009	-1.38135
WBGene00017468	-1.3811
WBGene00014864	-1.38092
WBGene00009389	-1.38055
WBGene00011713	-1.38034
WBGene00017151	-1.38014
WBGene00010795	-1.37971
WBGene00011517	-1.37733
WBGene00003540	-1.37716
WBGene00015427	-1.37659
WBGene00012886	-1.37646
WBGene00002218	-1.37645
WBGene00000969	-1.37581
WBGene00001454	-1.37579
WBGene00007479	-1.37571
WBGene00022893	-1.3756
WBGene00045387	-1.37523
WBGene00004048	-1.375
WBGene00008349	-1.37473
WBGene00016734	-1.37431
WBGene00021052	-1.3743
WBGene00003385	-1.37386
WBGene00001702	-1.37066
WBGene00018232	-1.36966
WBGene00010047	-1.3693
WBGene00004950	-1.36846
WBGene00012216	-1.36814
WBGene00019488	-1.36735
WBGene00009487	-1.36703
WBGene00020393	-1.36681
WBGene00006628	-1.36545
WBGene00011073	-1.36443
WBGene00003526	-1.36406
WBGene00018403	-1.36398
WBGene00010822	-1.3639
WBGene00003543	-1.36185
WBGene00004092	-1.3613
WBGene00015735	-1.36127
WBGene00009562	-1.35969
WBGene00021381	-1.35846
WBGene00016546	-1.35711
WBGene00011520	-1.35697
WBGene00022321	-1.35648
WBGene00004030	-1.35619
WBGene00007206	-1.35605
WBGene00007208	-1.35605
WBGene00021886	-1.35597
WBGene00020106	-1.35542
WBGene00017894	-1.35532
WBGene00022242	-1.35494
WBGene00004773	-1.35478
WBGene00018062	-1.35434
WBGene00003173	-1.35408
WBGene00007336	-1.35404
WBGene00000717	-1.35383
WBGene00015479	-1.35245
WBGene00013416	-1.35136
WBGene00019952	-1.35107
WBGene00016988	-1.35031
WBGene00007096	-1.34842
WBGene00019564	-1.34835
WBGene00015179	-1.34832
WBGene00008352	-1.34784
WBGene00007398	-1.3475
WBGene00012533	-1.34713
WBGene00021371	-1.34694
WBGene00016366	-1.34684
WBGene00007055	-1.34625
WBGene00011454	-1.34463
WBGene00016468	-1.34384
WBGene00009957	-1.3436
WBGene00019592	-1.34358
WBGene00015002	-1.3432
WBGene00009948	-1.34268
WBGene00009929	-1.34235
WBGene00021516	-1.34187
WBGene00004052	-1.34088
WBGene00009371	-1.34084
WBGene00017661	-1.33814
WBGene00003739	-1.33812
WBGene00006965	-1.33639
WBGene00008698	-1.3358
WBGene00001991	-1.33563
WBGene00007366	-1.33507
WBGene00010457	-1.33505
WBGene00001069	-1.33378
WBGene00020586	-1.33188
WBGene00194682	-1.33172
WBGene00006063	-1.33169
WBGene00015741	-1.33143
WBGene00020080	-1.33101
WBGene00018462	-1.3301
WBGene00008481	-1.33007
WBGene00008310	-1.32972
WBGene00044082	-1.32961
WBGene00195165	-1.32949
WBGene00006679	-1.32941
WBGene00017176	-1.32939
WBGene00009503	-1.32922
WBGene00011364	-1.32917
WBGene00006663	-1.32863
WBGene00011692	-1.32863
WBGene00020297	-1.32851
WBGene00003602	-1.32825
WBGene00009094	-1.32821
WBGene00044797	-1.32808
WBGene00000984	-1.32788
WBGene00015495	-1.32757
WBGene00020577	-1.32754
WBGene00003589	-1.32651
WBGene00044774	-1.32647
WBGene00019111	-1.32599
WBGene00007677	-1.32529
WBGene00010737	-1.32507
WBGene00013643	-1.32475
WBGene00003179	-1.32443
WBGene00011392	-1.32429
WBGene00007112	-1.32396
WBGene00000214	-1.32396
WBGene00019477	-1.32292
WBGene00019590	-1.32052
WBGene00007658	-1.31998
WBGene00020378	-1.31928
WBGene00005000	-1.31912
WBGene00016492	-1.31898
WBGene00009697	-1.31832
WBGene00018216	-1.31739
WBGene00000728	-1.3173
WBGene00006798	-1.31711
WBGene00004810	-1.31681
WBGene00006897	-1.31676
WBGene00012449	-1.31659
WBGene00022108	-1.31622
WBGene00012910	-1.31616
WBGene00013968	-1.31566
WBGene00021499	-1.31544
WBGene00020075	-1.3149
WBGene00016646	-1.31481
WBGene00016649	-1.31481
WBGene00013078	-1.31459
WBGene00002024	-1.31344
WBGene00044495	-1.31315
WBGene00001889	-1.31256
WBGene00001918	-1.31256
WBGene00004240	-1.31215
WBGene00012494	-1.31151
WBGene00001537	-1.31143
WBGene00006467	-1.31097
WBGene00002065	-1.31097
WBGene00019597	-1.31073
WBGene00008785	-1.31045
WBGene00020445	-1.31014
WBGene00017341	-1.30903
WBGene00009840	-1.30834
WBGene00189949	-1.30816
WBGene00020735	-1.30698
WBGene00012016	-1.30693
WBGene00017338	-1.3069
WBGene00003812	-1.30622
WBGene00003089	-1.30612
WBGene00023408	-1.30604
WBGene00014954	-1.30521
WBGene00007725	-1.3052
WBGene00010740	-1.30451
WBGene00007496	-1.30434
WBGene00017785	-1.30268
WBGene00019115	-1.30222
WBGene00015393	-1.30175
WBGene00001432	-1.30109
WBGene00000171	-1.30104
WBGene00011383	-1.30061
WBGene00015655	-1.30036
WBGene00006956	-1.29925
WBGene00002253	-1.29921
WBGene00015476	-1.29918
WBGene00045397	-1.2991
WBGene00012279	-1.29899
WBGene00006318	-1.29895
WBGene00021635	-1.29842
WBGene00019360	-1.29801
WBGene00018223	-1.29799
WBGene00001885	-1.29781
WBGene00020710	-1.29776
WBGene00007890	-1.2967
WBGene00014210	-1.2967
WBGene00022635	-1.29592
WBGene00019057	-1.29588
WBGene00004113	-1.29553
WBGene00012669	-1.2954
WBGene00020640	-1.295
WBGene00009026	-1.29432
WBGene00008421	-1.29419
WBGene00006853	-1.29398
WBGene00019487	-1.29393
WBGene00016540	-1.29336
WBGene00019622	-1.29327
WBGene00015231	-1.29312
WBGene00003031	-1.29299
WBGene00007664	-1.29272
WBGene00010772	-1.29259
WBGene00002282	-1.29225
WBGene00044355	-1.29147
WBGene00006650	-1.29143
WBGene00019593	-1.29137
WBGene00015115	-1.29123
WBGene00017786	-1.29013
WBGene00017865	-1.28904
WBGene00010155	-1.289
WBGene00086569	-1.28845
WBGene00000905	-1.28812
WBGene00013970	-1.28772
WBGene00019633	-1.28592
WBGene00010215	-1.28521
WBGene00016997	-1.28347
WBGene00023485	-1.28303
WBGene00012899	-1.28228
WBGene00000084	-1.28188
WBGene00044468	-1.28188
WBGene00018589	-1.27995
WBGene00004990	-1.27985
WBGene00011354	-1.2794
WBGene00010320	-1.27887
WBGene00023245	-1.27881
WBGene00045268	-1.27863
WBGene00013875	-1.2785
WBGene00018669	-1.27845
WBGene00020893	-1.27816
WBGene00018117	-1.27814
WBGene00015100	-1.27716
WBGene00013826	-1.27669
WBGene00008571	-1.27655
WBGene00021517	-1.27646
WBGene00016428	-1.27635
WBGene00018418	-1.27609
WBGene00017028	-1.27534
WBGene00011102	-1.27522
WBGene00011252	-1.27521
WBGene00014153	-1.27502
WBGene00206532	-1.27405
WBGene00012501	-1.27365
WBGene00017571	-1.27358
WBGene00005647	-1.27341
WBGene00003903	-1.27307
WBGene00010644	-1.27301
WBGene00012197	-1.27261
WBGene00003743	-1.27198
WBGene00020897	-1.27193
WBGene00019282	-1.27069
WBGene00006016	-1.27003
WBGene00003675	-1.26904
WBGene00008737	-1.26876
WBGene00015356	-1.26728
WBGene00004368	-1.26607
WBGene00021055	-1.26571
WBGene00269383	-1.26563
WBGene00015178	-1.26472
WBGene00012175	-1.26428
WBGene00015551	-1.26415
WBGene00012825	-1.2639
WBGene00010503	-1.26293
WBGene00016089	-1.26181
WBGene00012853	-1.2617
WBGene00015013	-1.25999
WBGene00016783	-1.25943
WBGene00022887	-1.25836
WBGene00017448	-1.25823
WBGene00002184	-1.25791
WBGene00009101	-1.2577
WBGene00044654	-1.25739
WBGene00012866	-1.25732
WBGene00013518	-1.25731
WBGene00008730	-1.25659
WBGene00009698	-1.25653
WBGene00009144	-1.25627
WBGene00019094	-1.25537
WBGene00008897	-1.25507
WBGene00023460	-1.2544
WBGene00009958	-1.25407
WBGene00018952	-1.25316
WBGene00011522	-1.25302
WBGene00005649	-1.253
WBGene00003693	-1.25269
WBGene00000425	-1.25217
WBGene00012898	-1.25146
WBGene00009543	-1.25008
WBGene00015430	-1.24971
WBGene00004267	-1.24921
WBGene00045468	-1.24916
WBGene00014181	-1.24915
WBGene00019180	-1.24797
WBGene00013717	-1.2474
WBGene00044191	-1.24714
WBGene00008644	-1.24587
WBGene00009500	-1.24568
WBGene00077770	-1.24553
WBGene00012592	-1.24514
WBGene00019913	-1.24511
WBGene00013989	-1.24402
WBGene00016367	-1.24396
WBGene00018435	-1.24182
WBGene00017350	-1.24179
WBGene00017639	-1.24172
WBGene00010744	-1.24165
[truncated: 601 more rows]

## Sheet: simr-1 25C gen1 up
Supplementary File 5, Sheet 5: mRNAs significantly up-regulated 2 fold or greater in simr-1 mutant animals at 25ºC for one generation.
Gene name	log2FoldChange
WBGene00016299	6.78394
WBGene00021731	6.63134
WBGene00007872	6.47225
WBGene00016885	6.24723
WBGene00018708	5.87946
WBGene00020306	5.7262
WBGene00003663	5.69323
WBGene00001693	5.61648
WBGene00004144	5.59472
WBGene00044703	5.48167
WBGene00017555	5.43964
WBGene00019267	5.40073
WBGene00010249	5.13593
WBGene00018138	5.05029
WBGene00007876	5.02406
WBGene00164974	4.87645
WBGene00050930	4.87547
WBGene00019517	4.8679
WBGene00008028	4.76839
WBGene00016072	4.74754
WBGene00019534	4.73276
WBGene00044639	4.69922
WBGene00017729	4.54187
WBGene00018202	4.48849
WBGene00014130	4.47142
WBGene00077653	4.40728
WBGene00020666	4.36704
WBGene00006719	4.35974
WBGene00044268	4.35048
WBGene00022446	4.26436
WBGene00017629	4.21246
WBGene00020988	4.20446
WBGene00016712	4.19624
WBGene00009310	4.16595
WBGene00000668	4.14454
WBGene00022512	4.10574
WBGene00018690	4.10201
WBGene00015623	4.08178
WBGene00011973	4.05824
WBGene00219238	4.01597
WBGene00015879	3.96943
WBGene00017182	3.96812
WBGene00018543	3.95493
WBGene00018433	3.93087
WBGene00017485	3.91413
WBGene00015589	3.8469
WBGene00012848	3.8252
WBGene00021711	3.81718
WBGene00004817	3.79505
WBGene00004171	3.78758
WBGene00006928	3.7759
WBGene00015230	3.76103
WBGene00019796	3.75677
WBGene00219725	3.73691
WBGene00009326	3.72457
WBGene00195226	3.68851
WBGene00015111	3.64699
WBGene00014663	3.64345
WBGene00017413	3.64099
WBGene00010705	3.59125
WBGene00017556	3.58586
WBGene00010690	3.58526
WBGene00020778	3.56758
WBGene00000819	3.5505
WBGene00017614	3.50314
WBGene00219374	3.49788
WBGene00219315	3.49132
WBGene00015894	3.48314
WBGene00022508	3.47869
WBGene00017069	3.47243
WBGene00019638	3.45111
WBGene00044702	3.43761
WBGene00012981	3.41345
WBGene00004352	3.41296
WBGene00000656	3.40853
WBGene00018443	3.40057
WBGene00008575	3.39873
WBGene00017432	3.39556
WBGene00206482	3.39
WBGene00007147	3.3819
WBGene00020961	3.38162
WBGene00017632	3.37237
WBGene00016713	3.36467
WBGene00009300	3.2722
WBGene00008495	3.26833
WBGene00009824	3.26784
WBGene00011979	3.25833
WBGene00012490	3.25741
WBGene00019044	3.25314
WBGene00004353	3.24834
WBGene00014771	3.22601
WBGene00003573	3.2246
WBGene00022237	3.22389
WBGene00017471	3.20513
WBGene00044439	3.19714
WBGene00021187	3.18081
WBGene00012055	3.17613
WBGene00219279	3.1756
WBGene00194675	3.16984
WBGene00017407	3.16823
WBGene00016180	3.16415
WBGene00009706	3.15501
WBGene00016534	3.15471
WBGene00007773	3.15268
WBGene00016346	3.14546
WBGene00009862	3.1427
WBGene00016951	3.13538
WBGene00014822	3.1274
WBGene00009309	3.12176
WBGene00000675	3.12057
WBGene00011153	3.11443
WBGene00017532	3.11275
WBGene00020304	3.11072
WBGene00020473	3.10945
WBGene00011262	3.10365
WBGene00020434	3.09747
WBGene00016086	3.09334
WBGene00017933	3.09293
WBGene00022163	3.06564
WBGene00006925	3.0635
WBGene00021656	3.05314
WBGene00011172	3.04601
WBGene00019672	3.03667
WBGene00015229	3.03423
WBGene00011152	3.0325
WBGene00016485	3.02777
WBGene00015236	3.0176
WBGene00018455	3.01504
WBGene00011342	3.01029
WBGene00044149	3.00627
WBGene00021730	2.99432
WBGene00009897	2.97783
WBGene00011993	2.97573
WBGene00012492	2.97367
WBGene00019569	2.97209
WBGene00019989	2.96757
WBGene00219218	2.96615
WBGene00011164	2.96451
WBGene00018235	2.95854
WBGene00014516	2.95607
WBGene00011690	2.9549
WBGene00016070	2.95326
WBGene00009960	2.93716
WBGene00019795	2.93508
WBGene00008537	2.92965
WBGene00021713	2.92927
WBGene00011689	2.92664
WBGene00008086	2.92556
WBGene00017015	2.91258
WBGene00021607	2.91243
WBGene00003410	2.90737
WBGene00017930	2.90722
WBGene00002088	2.90631
WBGene00006619	2.90596
WBGene00016230	2.87027
WBGene00021186	2.84515
WBGene00016056	2.8443
WBGene00010492	2.81443
WBGene00012792	2.81043
WBGene00018878	2.79504
WBGene00044585	2.7862
WBGene00015912	2.7852
WBGene00013799	2.7761
WBGene00009651	2.77531
WBGene00021853	2.76952
WBGene00045246	2.75334
WBGene00018643	2.75292
WBGene00020777	2.75167
WBGene00018808	2.74661
WBGene00003219	2.7306
WBGene00219278	2.72546
WBGene00016823	2.70556
WBGene00007290	2.70489
WBGene00012499	2.70216
WBGene00008534	2.6978
WBGene00015903	2.68908
WBGene00011810	2.68647
WBGene00017712	2.67859
WBGene00045382	2.66802
WBGene00012608	2.66779
WBGene00011753	2.66382
WBGene00018037	2.65801
WBGene00012247	2.6537
WBGene00011063	2.64828
WBGene00206389	2.64818
WBGene00044436	2.6465
WBGene00016303	2.64594
WBGene00018203	2.64213
WBGene00022292	2.64096
WBGene00003976	2.63039
WBGene00011487	2.61525
WBGene00001164	2.61516
WBGene00018578	2.61387
WBGene00019208	2.61132
WBGene00011642	2.61082
WBGene00020120	2.60923
WBGene00012498	2.60701
WBGene00011112	2.60356
WBGene00008464	2.6029
WBGene00012074	2.60069
WBGene00011388	2.5896
WBGene00022645	2.58603
WBGene00019654	2.57664
WBGene00008822	2.5736
WBGene00019082	2.56271
WBGene00016824	2.56158
WBGene00017631	2.55965
WBGene00021153	2.55899
WBGene00010555	2.55799
WBGene00019799	2.54554
WBGene00017843	2.54495
WBGene00005061	2.53889
WBGene00006541	2.53598
WBGene00007455	2.53286
WBGene00194981	2.5327
WBGene00020290	2.53245
WBGene00011184	2.52841
WBGene00019578	2.52194
WBGene00008207	2.51496
WBGene00017177	2.51479
WBGene00015083	2.51139
WBGene00012432	2.51069
WBGene00007873	2.50919
WBGene00009622	2.50834
WBGene00004351	2.50679
WBGene00021988	2.50679
WBGene00015932	2.50408
WBGene00021298	2.49899
WBGene00007771	2.49406
WBGene00004241	2.4939
WBGene00021797	2.48985
WBGene00003574	2.48912
WBGene00008584	2.48902
WBGene00010493	2.4864
WBGene00017265	2.48155
WBGene00016822	2.47861
WBGene00012900	2.47766
WBGene00016110	2.46991
WBGene00008068	2.468
WBGene00013162	2.46786
WBGene00005058	2.46432
WBGene00008844	2.46431
WBGene00021966	2.46368
WBGene00011981	2.45916
WBGene00017584	2.45821
WBGene00020771	2.45395
WBGene00019605	2.45159
WBGene00014904	2.44658
WBGene00008535	2.44206
WBGene00044503	2.4333
WBGene00008789	2.42951
WBGene00001483	2.42773
WBGene00008959	2.42651
WBGene00206362	2.42263
WBGene00012405	2.41388
WBGene00015693	2.41057
WBGene00022669	2.41052
WBGene00008824	2.40475
WBGene00017648	2.40187
WBGene00017589	2.3972
WBGene00000388	2.3963
WBGene00014166	2.39166
WBGene00022859	2.38996
WBGene00003784	2.38767
WBGene00003865	2.38563
WBGene00009629	2.37946
WBGene00017246	2.37801
WBGene00010123	2.37767
WBGene00000232	2.37503
WBGene00021605	2.37282
WBGene00019153	2.37028
WBGene00021763	2.37015
WBGene00009404	2.36699
WBGene00018537	2.36675
WBGene00019905	2.36192
WBGene00016995	2.36039
WBGene00015905	2.35966
WBGene00017962	2.35914
WBGene00016980	2.35747
WBGene00009427	2.35448
WBGene00016761	2.34953
WBGene00010000	2.34811
WBGene00014920	2.34808
WBGene00010928	2.34463
WBGene00017587	2.34056
WBGene00013157	2.33858
WBGene00008526	2.33835
WBGene00004374	2.33417
WBGene00012301	2.33314
WBGene00044520	2.33005
WBGene00017402	2.31824
WBGene00017473	2.31582
WBGene00011501	2.31264
WBGene00010351	2.31104
WBGene00006552	2.31078
WBGene00000465	2.3066
WBGene00005989	2.30627
WBGene00000733	2.30436
WBGene00011505	2.30374
WBGene00017703	2.30113
WBGene00015183	2.29828
WBGene00007850	2.29766
WBGene00015102	2.29271
WBGene00001692	2.28967
WBGene00019341	2.28226
WBGene00020433	2.27589
WBGene00021596	2.27291
WBGene00016565	2.27017
WBGene00008210	2.26747
WBGene00008823	2.26247
WBGene00045321	2.25992
WBGene00016486	2.25899
WBGene00022860	2.25572
WBGene00016943	2.25219
WBGene00008536	2.24738
WBGene00014097	2.24608
WBGene00009035	2.23811
WBGene00006546	2.23457
WBGene00015312	2.23172
WBGene00010483	2.22822
WBGene00016786	2.22256
WBGene00007242	2.22249
WBGene00019794	2.22075
WBGene00015037	2.22064
WBGene00010989	2.21777
WBGene00016273	2.21776
WBGene00013947	2.21667
WBGene00001569	2.20942
WBGene00013659	2.20749
WBGene00008212	2.20462
WBGene00007693	2.20325
WBGene00008546	2.19788
WBGene00044170	2.19581
WBGene00000716	2.19166
WBGene00017404	2.18138
WBGene00007405	2.18094
WBGene00008825	2.1747
WBGene00012436	2.17367
WBGene00010124	2.16777
WBGene00004062	2.1655
WBGene00009280	2.16356
WBGene00009662	2.15357
WBGene00009659	2.15348
WBGene00011741	2.15222
WBGene00006351	2.1511
WBGene00018439	2.15093
WBGene00009302	2.14605
WBGene00015899	2.14033
WBGene00012716	2.13959
WBGene00021035	2.13862
WBGene00019811	2.13607
WBGene00012727	2.1354
WBGene00004239	2.13426
WBGene00004354	2.12776
WBGene00011320	2.12201
WBGene00022586	2.11896
WBGene00009048	2.11652
WBGene00014117	2.11394
WBGene00017263	2.11279
WBGene00004750	2.11065
WBGene00018813	2.10402
WBGene00013409	2.09841
WBGene00010606	2.09604
WBGene00014992	2.08721
WBGene00015588	2.0845
WBGene00044998	2.0794
WBGene00021189	2.07606
WBGene00002260	2.07184
WBGene00018393	2.07134
WBGene00001607	2.07022
WBGene00018605	2.06713
WBGene00016358	2.0633
WBGene00018446	2.05978
WBGene00003231	2.05851
WBGene00016695	2.05811
WBGene00016024	2.05701
WBGene00001435	2.05602
WBGene00009301	2.05462
WBGene00010066	2.05339
WBGene00017061	2.05233
WBGene00043998	2.04907
WBGene00002006	2.04881
WBGene00009606	2.04689
WBGene00013509	2.04445
WBGene00011990	2.0438
WBGene00017501	2.0436
WBGene00013946	2.03926
WBGene00019565	2.03691
WBGene00006194	2.03473
WBGene00008656	2.03049
WBGene00022037	2.02806
WBGene00020338	2.02773
WBGene00015180	2.02544
WBGene00017538	2.02039
WBGene00019576	2.0166
WBGene00013127	2.01428
WBGene00001764	2.01424
WBGene00013319	2.01329
WBGene00010745	2.01276
WBGene00045291	2.01257
WBGene00002063	2.00579
WBGene00010332	2.00549
WBGene00004119	2.00295
WBGene00000496	2.00113
WBGene00011489	1.99784
WBGene00011870	1.99606
WBGene00004243	1.99384
WBGene00001921	1.98682
WBGene00018577	1.98189
WBGene00001694	1.97383
WBGene00004078	1.9682
WBGene00010657	1.9637
WBGene00016658	1.96283
WBGene00011691	1.96143
WBGene00008841	1.96122
WBGene00017548	1.96109
WBGene00012512	1.96004
WBGene00004334	1.95775
WBGene00016029	1.95503
WBGene00022257	1.95403
WBGene00016781	1.95354
WBGene00018647	1.95329
WBGene00022834	1.95295
WBGene00017247	1.95039
WBGene00007332	1.95035
WBGene00000752	1.94765
WBGene00000797	1.94742
WBGene00006555	1.9454
WBGene00000395	1.94522
WBGene00008492	1.94204
WBGene00013370	1.94121
WBGene00018735	1.93881
WBGene00014064	1.93516
WBGene00015898	1.93288
WBGene00022416	1.92874
WBGene00018862	1.92504
WBGene00019917	1.91878
WBGene00016872	1.91714
WBGene00003228	1.91656
WBGene00005023	1.91378
WBGene00006562	1.91252
WBGene00045275	1.9125
WBGene00020992	1.91244
WBGene00020948	1.91149
WBGene00008829	1.91101
WBGene00012947	1.91063
WBGene00013086	1.91052
WBGene00003230	1.90792
WBGene00008178	1.90508
WBGene00012020	1.90466
WBGene00016451	1.90197
WBGene00001606	1.89978
WBGene00010621	1.89909
WBGene00004217	1.8978
WBGene00009468	1.89585
WBGene00012040	1.89571
WBGene00022858	1.89537
WBGene00004242	1.89081
WBGene00007709	1.88975
WBGene00004802	1.88855
WBGene00020035	1.88613
WBGene00009426	1.88576
WBGene00010726	1.88412
WBGene00013453	1.88129
WBGene00015662	1.88068
WBGene00005552	1.87885
WBGene00001778	1.87753
WBGene00021093	1.87417
WBGene00011986	1.87347
WBGene00044249	1.87315
WBGene00006626	1.87073
WBGene00015914	1.86855
WBGene00001703	1.86755
WBGene00018828	1.86723
WBGene00001456	1.86342
WBGene00019628	1.86111
WBGene00016595	1.85787
WBGene00016087	1.85508
WBGene00001950	1.85276
WBGene00013567	1.8526
WBGene00011352	1.84508
WBGene00011683	1.84297
WBGene00004821	1.84041
WBGene00001683	1.83634
WBGene00019439	1.83488
WBGene00010353	1.83156
WBGene00017134	1.83102
WBGene00010568	1.82987
WBGene00018207	1.82859
WBGene00012103	1.82674
WBGene00004984	1.82409
WBGene00000133	1.82332
WBGene00019606	1.82056
WBGene00022440	1.81984
WBGene00011898	1.8192
WBGene00003395	1.81697
WBGene00009361	1.81352
WBGene00007391	1.81154
WBGene00014003	1.81103
WBGene00011236	1.80742
WBGene00009701	1.80113
WBGene00008218	1.79623
WBGene00009384	1.79183
WBGene00012941	1.79091
WBGene00001186	1.78717
WBGene00010011	1.78584
WBGene00005022	1.78266
WBGene00008854	1.77884
WBGene00008157	1.77829
WBGene00006394	1.76969
WBGene00020199	1.76922
WBGene00010940	1.76916
WBGene00016970	1.76911
WBGene00014667	1.76589
WBGene00044502	1.7617
WBGene00018424	1.75702
WBGene00016163	1.7569
WBGene00004246	1.75559
WBGene00010274	1.75442
WBGene00013698	1.74657
WBGene00013340	1.74524
WBGene00013383	1.74495
WBGene00022813	1.74296
WBGene00009787	1.74055
WBGene00017707	1.73831
WBGene00008494	1.7378
WBGene00013403	1.73226
WBGene00018845	1.73179
WBGene00002130	1.73167
WBGene00000016	1.73155
WBGene00004054	1.72897
WBGene00011615	1.72867
WBGene00017658	1.72847
WBGene00001436	1.72585
WBGene00017986	1.72302
WBGene00017567	1.72259
WBGene00001981	1.72253
WBGene00012374	1.71953
WBGene00011956	1.71875
WBGene00010051	1.71726
WBGene00012546	1.71663
WBGene00021651	1.71598
WBGene00017948	1.71377
WBGene00000732	1.71316
WBGene00003864	1.70969
WBGene00014902	1.70945
WBGene00003229	1.70898
WBGene00015759	1.70804
WBGene00000422	1.7074
WBGene00015141	1.70643
WBGene00021503	1.70581
WBGene00017934	1.70344
WBGene00007489	1.6948
WBGene00004780	1.69165
WBGene00000460	1.69073
WBGene00004392	1.68852
WBGene00009431	1.68734
WBGene00017038	1.68541
WBGene00009968	1.68268
WBGene00001078	1.68
WBGene00019431	1.6799
WBGene00013152	1.67819
WBGene00001940	1.67647
WBGene00013380	1.67628
WBGene00000867	1.67614
WBGene00003246	1.67581
WBGene00007649	1.67522
WBGene00003569	1.66951
WBGene00018438	1.6691
WBGene00011509	1.66853
WBGene00001647	1.66804
WBGene00000512	1.66296
WBGene00000988	1.66179
WBGene00017939	1.66036
WBGene00000868	1.65809
WBGene00015698	1.65714
WBGene00077603	1.65648
WBGene00019189	1.65559
WBGene00015171	1.65476
WBGene00000913	1.65302
WBGene00012879	1.64697
WBGene00012299	1.64695
WBGene00002124	1.64547
WBGene00002144	1.64488
WBGene00008493	1.6437
WBGene00044809	1.63933
WBGene00019938	1.63737
WBGene00016178	1.63541
WBGene00045308	1.63414
WBGene00010750	1.634
WBGene00008440	1.63397
WBGene00007196	1.63015
WBGene00006977	1.62558
WBGene00001760	1.62553
WBGene00017892	1.62292
WBGene00012387	1.61915
WBGene00003664	1.61876
WBGene00008298	1.61775
WBGene00001941	1.61492
WBGene00017322	1.61365
WBGene00009429	1.61355
WBGene00021916	1.61218
WBGene00020910	1.61207
WBGene00010637	1.61192
WBGene00018303	1.61172
WBGene00194674	1.60889
WBGene00022127	1.60849
WBGene00010691	1.60812
WBGene00013311	1.60556
WBGene00001601	1.60055
WBGene00008051	1.59856
WBGene00010354	1.59818
WBGene00007509	1.59778
WBGene00019772	1.59565
WBGene00019577	1.59489
WBGene00017985	1.58961
WBGene00010411	1.58938
WBGene00015631	1.58898
WBGene00001792	1.58896
WBGene00007979	1.58615
WBGene00008933	1.58491
WBGene00008538	1.58193
WBGene00007624	1.58059
WBGene00012633	1.58042
WBGene00008460	1.57866
WBGene00007867	1.57497
WBGene00021056	1.57422
WBGene00270290	1.5727
WBGene00009238	1.57231
WBGene00001155	1.56936
WBGene00012324	1.56614
WBGene00010472	1.5643
WBGene00000894	1.5635
WBGene00016431	1.56099
WBGene00000075	1.55918
WBGene00012840	1.55819
WBGene00011046	1.55528
WBGene00007875	1.55277
WBGene00007278	1.5471
WBGene00235295	1.54172
WBGene00011061	1.5407
WBGene00050946	1.53981
WBGene00010595	1.53932
WBGene00016576	1.53869
WBGene00000608	1.53806
WBGene00007376	1.53764
WBGene00019234	1.53567
WBGene00011434	1.53404
WBGene00017433	1.53188
WBGene00016877	1.53125
WBGene00022445	1.52912
WBGene00020630	1.526
WBGene00015011	1.52255
WBGene00003241	1.52127
WBGene00017898	1.52119
WBGene00009186	1.52005
WBGene00011070	1.51982
WBGene00009727	1.51869
WBGene00022262	1.51392
WBGene00003216	1.51375
WBGene00010759	1.51202
WBGene00021658	1.51179
WBGene00016605	1.51151
WBGene00044107	1.51142
WBGene00015357	1.51109
WBGene00023421	1.51022
WBGene00008904	1.50994
WBGene00022452	1.50978
WBGene00003546	1.50671
WBGene00015922	1.50667
WBGene00019962	1.50341
WBGene00003214	1.50299
WBGene00000731	1.5024
WBGene00009383	1.49928
WBGene00000799	1.49808
WBGene00000644	1.48978
WBGene00008085	1.48974
WBGene00017764	1.48936
WBGene00003994	1.48843
WBGene00003738	1.48727
WBGene00008747	1.48694
WBGene00015677	1.48692
WBGene00004134	1.48261
WBGene00000866	1.47998
WBGene00195070	1.47888
WBGene00021725	1.47825
WBGene00044414	1.47404
WBGene00020862	1.47358
WBGene00045316	1.47282
WBGene00020025	1.47168
WBGene00009834	1.46432
WBGene00019858	1.46421
WBGene00007128	1.46081
WBGene00013381	1.45906
WBGene00002073	1.45827
WBGene00001597	1.4552
WBGene00007580	1.45519
WBGene00007341	1.45295
WBGene00001755	1.45134
WBGene00010666	1.45123
WBGene00006066	1.45075
WBGene00010477	1.45073
WBGene00007417	1.44992
WBGene00002225	1.4487
WBGene00002125	1.44639
WBGene00004893	1.44423
WBGene00010665	1.44302
WBGene00016558	1.44256
WBGene00011056	1.43984
WBGene00000698	1.43977
WBGene00012231	1.43822
WBGene00003184	1.437
WBGene00019131	1.43438
WBGene00001686	1.43434
WBGene00018689	1.43416
WBGene00006324	1.43147
WBGene00009930	1.43133
WBGene00019017	1.42908
WBGene00003412	1.42861
WBGene00007643	1.42678
WBGene00012341	1.42401
WBGene00015624	1.42265
WBGene00013238	1.42221
WBGene00077732	1.42146
WBGene00004798	1.42025
WBGene00018572	1.41813
WBGene00011365	1.41672
WBGene00011394	1.41595
WBGene00004370	1.41584
WBGene00015344	1.41531
WBGene00010036	1.41485
WBGene00011614	1.41293
WBGene00000696	1.41253
WBGene00013982	1.41172
WBGene00004208	1.41134
WBGene00015586	1.40802
WBGene00001165	1.40705
WBGene00019214	1.40677
WBGene00018929	1.40626
WBGene00003158	1.40561
WBGene00016027	1.40254
WBGene00001170	1.40245
WBGene00009006	1.39897
WBGene00001855	1.39377
WBGene00016638	1.39351
WBGene00006699	1.39313
WBGene00007225	1.39277
WBGene00010953	1.39235
WBGene00004728	1.39221
WBGene00011350	1.39198
WBGene00004086	1.39181
WBGene00019987	1.38921
WBGene00013254	1.38613
WBGene00011835	1.38521
WBGene00020216	1.38412
WBGene00020652	1.38237
WBGene00019890	1.38166
WBGene00001335	1.3812
WBGene00016898	1.3807
WBGene00021781	1.37991
WBGene00010971	1.37914
WBGene00007352	1.3781
WBGene00000995	1.37715
WBGene00017301	1.37683
WBGene00001638	1.37376
WBGene00016423	1.37175
WBGene00016573	1.37109
WBGene00008027	1.36996
WBGene00012684	1.36988
WBGene00016206	1.36851
WBGene00009952	1.36842
WBGene00007978	1.36764
WBGene00019316	1.3648
WBGene00011834	1.3641
WBGene00022073	1.36191
WBGene00001581	1.36186
WBGene00004771	1.36161
WBGene00001175	1.3603
WBGene00021818	1.35851
WBGene00014987	1.35278
WBGene00003155	1.35248
WBGene00019441	1.35123
WBGene00008567	1.35099
WBGene00009656	1.34723
WBGene00016937	1.3465
WBGene00000392	1.34405
WBGene00008123	1.34178
WBGene00005019	1.34163
WBGene00000462	1.33988
WBGene00015145	1.33865
WBGene00020756	1.33829
WBGene00003957	1.33815
WBGene00015477	1.33571
WBGene00021051	1.33436
WBGene00020684	1.33388
WBGene00012958	1.33056
WBGene00003979	1.33046
WBGene00011575	1.32995
WBGene00012104	1.32872
WBGene00002136	1.32825
WBGene00007507	1.32791
WBGene00017782	1.32727
WBGene00008741	1.32672
WBGene00000990	1.32669
WBGene00077585	1.3251
WBGene00016501	1.32377
WBGene00010609	1.32377
WBGene00008936	1.32132
WBGene00007966	1.32107
WBGene00000262	1.32061
WBGene00008545	1.32059
WBGene00001793	1.32054
WBGene00021372	1.32022
WBGene00003601	1.31999
WBGene00004027	1.31629
WBGene00016169	1.31483
WBGene00011409	1.31375
WBGene00022455	1.31309
WBGene00015896	1.31206
WBGene00006044	1.31188
WBGene00007573	1.31156
WBGene00000444	1.31106
WBGene00011915	1.31101
WBGene00001399	1.31043
WBGene00001470	1.30591
WBGene00021343	1.30462
WBGene00006939	1.30361
WBGene00016942	1.30264
WBGene00018636	1.30013
WBGene00012713	1.30013
WBGene00000803	1.2997
WBGene00021470	1.29905
WBGene00008390	1.29737
WBGene00020703	1.29349
WBGene00004391	1.29243
WBGene00022854	1.29065
WBGene00007342	1.29019
WBGene00003159	1.28939
WBGene00020813	1.28907
WBGene00003154	1.2873
WBGene00002055	1.2831
WBGene00020461	1.28148
WBGene00018465	1.27796
WBGene00001130	1.27574
WBGene00018009	1.27551
WBGene00022815	1.27402
WBGene00020128	1.27285
WBGene00018998	1.27278
WBGene00077690	1.27263
WBGene00022140	1.26974
WBGene00007248	1.26896
WBGene00007362	1.26878
WBGene00013268	1.268
WBGene00015529	1.26609
WBGene00008965	1.26592
WBGene00011988	1.26382
WBGene00015565	1.26336
WBGene00013552	1.26258
WBGene00009441	1.26249
WBGene00011275	1.25851
WBGene00018806	1.25778
WBGene00195169	1.25714
WBGene00013073	1.25679
WBGene00006384	1.25512
WBGene00023399	1.25498
WBGene00235259	1.25231
WBGene00002214	1.25218
WBGene00022245	1.24901
WBGene00000406	1.24854
WBGene00019504	1.24775
WBGene00004326	1.24643
WBGene00001247	1.24608
WBGene00021015	1.24491
WBGene00000099	1.24411
WBGene00013863	1.24265
WBGene00003955	1.24202
WBGene00002226	1.24068
WBGene00018950	1.23972
WBGene00004755	1.23909
WBGene00013137	1.23875
WBGene00018015	1.2345
WBGene00002029	1.23425
WBGene00015766	1.23256
WBGene00000670	1.23216
WBGene00000473	1.23193
WBGene00022705	1.23113
WBGene00020314	1.23101
WBGene00003771	1.23087
WBGene00022394	1.23008
WBGene00009163	1.22914
WBGene00018252	1.22861
WBGene00015474	1.22743
WBGene00007681	1.22728
WBGene00022158	1.22628
WBGene00000405	1.2259
WBGene00015802	1.22432
WBGene00003519	1.22389
WBGene00012015	1.22141
WBGene00019971	1.22096
WBGene00019259	1.21988
WBGene00018948	1.21906
WBGene00008174	1.21882
WBGene00012841	1.21633
WBGene00012844	1.21633
WBGene00004975	1.21382
WBGene00001051	1.21332
WBGene00019833	1.2133
WBGene00009025	1.21299
WBGene00018006	1.21238
WBGene00016782	1.21226
WBGene00011499	1.21221
WBGene00006793	1.21109
WBGene00016474	1.21076
WBGene00015676	1.21045
WBGene00004339	1.2101
WBGene00007024	1.2089
WBGene00000479	1.20785
WBGene00012151	1.20717
WBGene00007129	1.20669
WBGene00235310	1.20642
WBGene00007965	1.20632
WBGene00010362	1.20605
WBGene00003067	1.20527
WBGene00003253	1.20489
WBGene00019824	1.20185
WBGene00003611	1.20132
WBGene00001919	1.20065
WBGene00002031	1.19984
WBGene00001020	1.19778
WBGene00000667	1.1977
WBGene00009627	1.19685
WBGene00006869	1.19612
WBGene00021420	1.19543
WBGene00021200	1.19493
WBGene00015301	1.19426
WBGene00017031	1.19137
WBGene00020672	1.19028
WBGene00007011	1.19021
WBGene00017354	1.1897
WBGene00019683	1.1882
WBGene00018811	1.18757
WBGene00002989	1.18621
WBGene00018615	1.18604
WBGene00007153	1.18488
WBGene00002068	1.18328
WBGene00007846	1.18183
WBGene00018488	1.18178
WBGene00004458	1.18172
WBGene00008172	1.18113
WBGene00019918	1.1801
WBGene00016644	1.17976
WBGene00013724	1.17921
WBGene00000155	1.17862
WBGene00020006	1.17777
WBGene00012583	1.17749
WBGene00018900	1.17535
WBGene00007167	1.17492
WBGene00019077	1.17213
WBGene00015989	1.17212
WBGene00017825	1.17118
WBGene00003612	1.17095
WBGene00001511	1.17055
WBGene00010277	1.16963
WBGene00007171	1.16907
WBGene00018897	1.1679
WBGene00006528	1.16769
WBGene00003914	1.16757
WBGene00000474	1.16668
WBGene00044072	1.16616
WBGene00022532	1.16601
WBGene00017046	1.16454
WBGene00011038	1.1643
WBGene00012686	1.16276
WBGene00017269	1.16252
WBGene00008003	1.16198
WBGene00008882	1.16132
WBGene00002008	1.16115
WBGene00010981	1.16086
WBGene00010787	1.16085
WBGene00001922	1.16075
WBGene00018830	1.16012
WBGene00015756	1.15976
WBGene00010233	1.15902
WBGene00008387	1.15886
WBGene00018678	1.15695
WBGene00004148	1.15684
WBGene00003384	1.15678
WBGene00000757	1.15535
WBGene00013610	1.15509
WBGene00003912	1.15404
WBGene00000829	1.15387
WBGene00016352	1.1538
WBGene00012481	1.15127
WBGene00018586	1.14978
WBGene00014938	1.14912
WBGene00010719	1.14894
WBGene00007087	1.14748
WBGene00021662	1.14707
WBGene00003177	1.14592
WBGene00018137	1.14505
WBGene00019473	1.14385
WBGene00000064	1.14334
WBGene00001481	1.14283
WBGene00001046	1.14193
WBGene00006916	1.14183
WBGene00012484	1.14172
WBGene00000865	1.14119
WBGene00019064	1.141
WBGene00010678	1.14077
WBGene00006927	1.14004
WBGene00003162	1.14
WBGene00010128	1.13999
WBGene00001571	1.1393
WBGene00001092	1.13882
WBGene00015291	1.13764
WBGene00007887	1.13741
WBGene00003829	1.13676
WBGene00012723	1.1364
WBGene00008651	1.13596
WBGene00012615	1.13568
WBGene00009988	1.1355
WBGene00195189	1.13511
WBGene00003989	1.13361
WBGene00011498	1.13292
WBGene00002229	1.13193
WBGene00008170	1.13134
WBGene00014011	1.13034
WBGene00000680	1.13026
WBGene00011884	1.13005
WBGene00006804	1.12991
WBGene00013847	1.12965
WBGene00007168	1.12945
WBGene00018302	1.12907
WBGene00001636	1.12855
WBGene00006536	1.12848
WBGene00000186	1.12798
WBGene00044794	1.12764
WBGene00022425	1.12733
WBGene00010984	1.12688
WBGene00017450	1.12632
WBGene00010583	1.12619
WBGene00002219	1.12528
WBGene00022702	1.12484
WBGene00017053	1.12323
WBGene00000098	1.12257
WBGene00011195	1.12103
WBGene00000544	1.11931
WBGene00016246	1.11917
WBGene00000121	1.11766
WBGene00006446	1.11714
WBGene00011994	1.11713
WBGene00006565	1.117
WBGene00007532	1.11688
WBGene00022122	1.11674
WBGene00013349	1.11635
WBGene00010659	1.11611
WBGene00013019	1.11512
WBGene00009461	1.11493
WBGene00007733	1.11492
WBGene00010132	1.11389
WBGene00017060	1.11244
WBGene00003157	1.11195
WBGene00004020	1.11126
WBGene00010364	1.11065
WBGene00015478	1.11018
WBGene00001831	1.10966
WBGene00019943	1.10902
WBGene00011788	1.10856
WBGene00013644	1.10751
WBGene00021246	1.10681
WBGene00000417	1.10634
WBGene00011250	1.1062
WBGene00021541	1.10512
WBGene00002348	1.10499
WBGene00044032	1.10342
WBGene00017730	1.10273
WBGene00011867	1.10239
WBGene00015577	1.10206
WBGene00009126	1.10039
WBGene00013134	1.09957
WBGene00006921	1.09938
WBGene00018959	1.09891
WBGene00012530	1.09871
WBGene00006795	1.09858
WBGene00020050	1.09775
WBGene00018903	1.09772
WBGene00004282	1.09763
WBGene00014092	1.09747
WBGene00010080	1.09705
WBGene00009007	1.09641
WBGene00010941	1.09604
WBGene00012513	1.09398
WBGene00009342	1.09236
WBGene00022805	1.09093
WBGene00021321	1.09084
WBGene00017125	1.08955
WBGene00013966	1.08924
WBGene00013122	1.08794
WBGene00006590	1.08734
WBGene00044431	1.08726
WBGene00007766	1.08709
WBGene00017931	1.08657
WBGene00013158	1.08636
WBGene00005020	1.08608
WBGene00020322	1.08587
WBGene00020392	1.08406
WBGene00004737	1.08342
WBGene00020730	1.0832
WBGene00022462	1.0828
WBGene00004041	1.08261
WBGene00006477	1.08169
WBGene00013270	1.07944
WBGene00016632	1.07908
WBGene00010706	1.07905
WBGene00020167	1.07837
WBGene00007860	1.07759
WBGene00000708	1.07636
WBGene00016192	1.07592
WBGene00021542	1.07564
WBGene00194794	1.07535
WBGene00003183	1.07534
WBGene00015590	1.07482
WBGene00007445	1.07457
WBGene00007118	1.07432
WBGene00000265	1.07414
WBGene00008587	1.07395
WBGene00007221	1.07375
WBGene00001583	1.07345
WBGene00016068	1.07261
WBGene00007150	1.07203
WBGene00014087	1.07101
WBGene00008035	1.07001
WBGene00009293	1.06986
WBGene00019125	1.06959
WBGene00004110	1.06952
WBGene00008418	1.0691
WBGene00002070	1.06907
WBGene00015146	1.06885
WBGene00019864	1.06883
WBGene00013719	1.06872
WBGene00020588	1.06818
WBGene00011203	1.06723
WBGene00001060	1.06519
WBGene00010702	1.06467
WBGene00002047	1.06335
WBGene00016250	1.06246
WBGene00011819	1.06136
WBGene00011324	1.06084
WBGene00017027	1.06
WBGene00001834	1.05947
WBGene00015866	1.05882
WBGene00001632	1.05853
WBGene00001977	1.05836
WBGene00006518	1.05811
WBGene00006605	1.05793
WBGene00013139	1.05702
WBGene00016792	1.057
WBGene00012276	1.05663
WBGene00001484	1.05545
WBGene00021486	1.05532
WBGene00015263	1.05441
WBGene00004163	1.05402
WBGene00012552	1.053
WBGene00013596	1.05285
WBGene00017643	1.05274
WBGene00009179	1.05256
WBGene00016311	1.05227
WBGene00009272	1.05209
WBGene00000461	1.05197
WBGene00013726	1.05171
WBGene00017775	1.05149
WBGene00008743	1.05029
WBGene00000419	1.04967
WBGene00008749	1.04895
WBGene00007620	1.04852
WBGene00006404	1.04761
WBGene00004465	1.0473
WBGene00019464	1.04718
WBGene00018423	1.04673
WBGene00013597	1.04638
WBGene00020955	1.04549
WBGene00010747	1.04545
WBGene00008710	1.04545
WBGene00001869	1.04545
WBGene00021485	1.04509
WBGene00009444	1.0448
WBGene00011645	1.04467
WBGene00016143	1.04434
WBGene00021103	1.04414
WBGene00021841	1.04413
WBGene00021467	1.04375
WBGene00006496	1.04332
WBGene00013538	1.04236
WBGene00007710	1.04212
WBGene00020219	1.04133
WBGene00018960	1.04112
WBGene00017719	1.0409
WBGene00010433	1.04001
WBGene00022856	1.03993
WBGene00194696	1.03976
WBGene00011481	1.03948
WBGene00001639	1.03918
WBGene00015283	1.03915
WBGene00004042	1.03861
WBGene00044188	1.03858
WBGene00011282	1.03704
WBGene00020103	1.03667
WBGene00000804	1.03646
WBGene00016363	1.0362
WBGene00007696	1.03586
WBGene00007327	1.03557
WBGene00003795	1.03527
WBGene00044156	1.03378
WBGene00011300	1.03362
WBGene00004305	1.03301
WBGene00044345	1.03256
WBGene00017886	1.03223
WBGene00018864	1.03196
WBGene00019657	1.03119
WBGene00016955	1.03085
WBGene00008132	1.03043
WBGene00001836	1.02941
WBGene00011410	1.02931
WBGene00016013	1.02846
WBGene00001102	1.028
WBGene00020932	1.028
WBGene00021888	1.02783
WBGene00008080	1.02757
WBGene00022036	1.02737
WBGene00019819	1.02681
WBGene00003514	1.0263
WBGene00003413	1.02541
WBGene00016836	1.0249
WBGene00009878	1.02471
WBGene00010629	1.0247
WBGene00012002	1.02432
WBGene00219451	1.02429
WBGene00008385	1.02388
WBGene00010519	1.02377
WBGene00010149	1.02366
WBGene00000597	1.02288
WBGene00011016	1.02255
WBGene00017365	1.02237
WBGene00010963	1.02223
WBGene00013658	1.02127
WBGene00007956	1.02056
WBGene00007162	1.02007
WBGene00007578	1.02005
WBGene00013196	1.02
WBGene00017990	1.01994
WBGene00019011	1.01989
WBGene00002262	1.01946
WBGene00002072	1.01937
WBGene00012220	1.01924
WBGene00003930	1.01909
WBGene00009883	1.01904
WBGene00011139	1.01896
WBGene00001774	1.01875
WBGene00013482	1.01847
WBGene00009008	1.01837
WBGene00006707	1.01789
WBGene00012360	1.01684
WBGene00021460	1.0162
WBGene00018491	1.01617
WBGene00021049	1.01441
WBGene00021756	1.01388
WBGene00018409	1.01321
WBGene00016444	1.01317
WBGene00011804	1.01315
WBGene00008005	1.01299
WBGene00012715	1.01261
WBGene00001829	1.01222
WBGene00008354	1.01049
WBGene00013857	1.01037
WBGene00219425	1.0091
WBGene00015887	1.00847
WBGene00018954	1.00842
WBGene00010623	1.0084
WBGene00009667	1.00833
WBGene00018271	1.00796
WBGene00013689	1.00763
WBGene00013917	1.00715
WBGene00006311	1.0058
WBGene00010565	1.00515
WBGene00044204	1.00515
WBGene00005021	1.00492
WBGene00006387	1.00405
WBGene00019907	1.00378
WBGene00013164	1.00319
WBGene00011696	1.00312
WBGene00001749	1.00261
WBGene00001499	1.00244
WBGene00016291	1.00221
WBGene00011887	1.00217
WBGene00019893	1.0012
WBGene00003156	1.00075
WBGene00022835	1.0005
WBGene00020404	1.00036
WBGene00020399	1.00027

## Sheet: simr-1 25C gen2 down
Supplementary File 5, Sheet 6: mRNAs significantly down-regulated 2 fold or greater in simr-1 mutant animals at 25ºC for two generations.
Gene name	log2FoldChange (relative to wt gen1)	log2FoldChange (relative to wt gen2)
WBGene00202504	-6.32844	-6.25236
WBGene00000650	-6.29866	-3.99559
WBGene00194710	-5.76951	-4.89431
WBGene00009041	-5.48067	-3.58745
WBGene00011848	-5.27048	-5.68314
WBGene00019839	-5.15845	-4.20105
WBGene00000738	-5.01914	-3.15344
WBGene00010209	-4.95738	-3.73725
WBGene00014094	-4.91248	-4.68357
WBGene00044427	-4.88611	-6.15075
WBGene00044113	-4.83763	-3.81745
WBGene00018092	-4.68199	-3.52396
WBGene00010461	-4.25679	-3.2473
WBGene00014186	-4.20097	-3.12132
WBGene00012673	-4.14205	-3.51226
WBGene00015679	-4.00975	-3.05339
WBGene00045457	-3.93142	-3.83697
WBGene00016242	-3.91838	-3.77441
WBGene00019314	-3.87988	-4.28565
WBGene00002015	-3.85434	-3.32556
WBGene00000893	-3.79974	-3.28566
WBGene00044242	-3.79266	-1.92041
WBGene00044379	-3.76241	-4.56398
WBGene00005005	-3.74454	-4.77246
WBGene00011508	-3.66752	-2.61727
WBGene00022477	-3.65413	-4.43101
WBGene00015598	-3.64831	-3.84363
WBGene00002017	-3.63499	-2.68061
WBGene00008376	-3.62644	-2.49475
WBGene00009438	-3.61675	-2.6234
WBGene00019887	-3.57148	-2.57006
WBGene00219298	-3.53634	-4.19707
WBGene00002019	-3.52508	-2.84802
WBGene00002020	-3.52508	-2.84802
WBGene00011427	-3.42594	-2.61862
WBGene00005551	-3.37091	-3.58069
WBGene00020613	-3.3364	-3.73464
WBGene00012961	-3.32461	-2.96303
WBGene00022725	-3.32082	-2.82776
WBGene00023483	-3.31361	-2.63023
WBGene00235093	-3.24634	-2.34891
WBGene00044024	-3.24516	-2.57128
WBGene00009827	-3.20362	-4.25751
WBGene00002016	-3.1964	-2.75655
WBGene00006894	-3.18613	-3.36849
WBGene00008295	-3.1823	-2.01334
WBGene00002018	-3.16841	-2.74451
WBGene00018102	-3.16031	-2.94842
WBGene00022189	-3.15638	-4.29977
WBGene00017153	-3.13303	-2.5274
WBGene00009691	-3.12862	-2.44898
WBGene00002102	-3.12702	-3.97808
WBGene00018630	-3.11549	-2.18916
WBGene00010212	-3.08926	-2.32003
WBGene00002012	-3.08596	-2.03214
WBGene00005548	-3.07472	-2.30627
WBGene00015504	-3.06956	-2.83092
WBGene00022747	-3.06211	-3.02824
WBGene00017186	-3.06024	-1.78591
WBGene00021107	-3.06024	-1.78591
WBGene00010295	-3.038	-2.09172
WBGene00009600	-2.99793	-1.33177
WBGene00001119	-2.99221	-2.41549
WBGene00018169	-2.99216	-2.57697
WBGene00008671	-2.97533	-3.43392
WBGene00013791	-2.97478	-2.53313
WBGene00021491	-2.97236	-4.19219
WBGene00020546	-2.97161	-3.85016
WBGene00020976	-2.96487	-2.64575
WBGene00011524	-2.96462	-3.00964
WBGene00014067	-2.96454	-2.45076
WBGene00022789	-2.95279	-2.17383
WBGene00022024	-2.94844	-1.58737
WBGene00011190	-2.9421	-3.19452
WBGene00007682	-2.92532	-2.81319
WBGene00008673	-2.92087	-2.67184
WBGene00007560	-2.87763	-2.06765
WBGene00012540	-2.83366	-1.85898
WBGene00022382	-2.80244	-2.78364
WBGene00044521	-2.79987	-3.11023
WBGene00013527	-2.79968	-2.7974
WBGene00008349	-2.7988	-1.78157
WBGene00008591	-2.78546	-2.39454
WBGene00001075	-2.78164	-2.96888
WBGene00016700	-2.73766	-1.22233
WBGene00017560	-2.73579	-1.82892
WBGene00011624	-2.71176	-2.50692
WBGene00008105	-2.652	-2.70088
WBGene00018345	-2.62645	-2.78045
WBGene00009428	-2.60874	-3.05332
WBGene00235271	-2.60572	-3.04853
WBGene00001477	-2.60479	-1.87142
WBGene00016164	-2.58167	-2.91368
WBGene00202514	-2.56667	-2.85707
WBGene00016247	-2.5664	-2.29133
WBGene00017267	-2.55129	-2.43327
WBGene00017270	-2.55129	-2.43327
WBGene00007800	-2.54183	-2.54229
WBGene00015596	-2.54008	-2.65024
WBGene00007506	-2.53984	-2.13182
WBGene00018997	-2.50671	-2.27993
WBGene00008302	-2.50263	-2.48352
WBGene00045251	-2.46847	-2.0851
WBGene00010294	-2.45956	-1.87176
WBGene00013837	-2.45501	-2.17405
WBGene00009692	-2.41082	-2.4195
WBGene00008850	-2.40977	-2.35225
WBGene00011610	-2.40243	-1.52457
WBGene00020983	-2.38881	-2.62671
WBGene00017307	-2.37303	-1.28867
WBGene00020626	-2.36695	-1.77789
WBGene00007758	-2.32986	-2.15533
WBGene00020579	-2.32882	-2.54253
WBGene00003092	-2.32077	-3.21209
WBGene00016568	-2.309	-2.03759
WBGene00016785	-2.29556	-2.06648
WBGene00077593	-2.28497	-1.37374
WBGene00001724	-2.26875	-1.2823
WBGene00012878	-2.26516	-2.0982
WBGene00021342	-2.25898	-1.08438
WBGene00009261	-2.25369	-1.06228
WBGene00022222	-2.2468	-1.42014
WBGene00011957	-2.22744	-1.83131
WBGene00004155	-2.22469	-1.69091
WBGene00019154	-2.22167	-1.97067
WBGene00007366	-2.21162	-1.48905
WBGene00013013	-2.20782	-2.35333
WBGene00007694	-2.19417	-1.98357
WBGene00019931	-2.18891	-1.95864
WBGene00006947	-2.18377	-1.90146
WBGene00019564	-2.17758	-1.87055
WBGene00020250	-2.16938	-1.79191
WBGene00013960	-2.16694	-1.8734
WBGene00045401	-2.16415	-1.73035
WBGene00000535	-2.16403	-2.02475
WBGene00004002	-2.13879	-1.18141
WBGene00235268	-2.13178	-1.84841
WBGene00077490	-2.13155	-2.69951
WBGene00014135	-2.1252	-3.23979
WBGene00019622	-2.11581	-2.1556
WBGene00007459	-2.10981	-2.16311
WBGene00077781	-2.09458	-1.22615
WBGene00015152	-2.09274	-2.92297
WBGene00019479	-2.08007	-2.28066
WBGene00017539	-2.07684	-1.80661
WBGene00001055	-2.07054	-2.1553
WBGene00017214	-2.05146	-1.72813
WBGene00044479	-2.04738	-2.01169
WBGene00017382	-2.03341	-2.01039
WBGene00044302	-2.01809	-2.13283
WBGene00021978	-2.00517	-1.62656
WBGene00016923	-1.98865	-1.84681
WBGene00009292	-1.98053	-1.55939
WBGene00001858	-1.97968	-1.86992
WBGene00007181	-1.97433	-2.0694
WBGene00195241	-1.96864	-1.81656
WBGene00014954	-1.96846	-1.27249
WBGene00007497	-1.95259	-1.39846
WBGene00018669	-1.95092	-1.10242
WBGene00000695	-1.9509	-2.77773
WBGene00016783	-1.94662	-1.94478
WBGene00010768	-1.9459	-1.47563
WBGene00015355	-1.94409	-2.09541
WBGene00022572	-1.94228	-1.9729
WBGene00020878	-1.94151	-1.18347
WBGene00011677	-1.93399	-1.72328
WBGene00011175	-1.93343	-2.6703
WBGene00015225	-1.93266	-2.31561
WBGene00015993	-1.92057	-1.01626
WBGene00011608	-1.91719	-1.68349
WBGene00009488	-1.90403	-2.46668
WBGene00006539	-1.90059	-1.78915
WBGene00008944	-1.88863	-1.53992
WBGene00206388	-1.88818	-1.14641
WBGene00016953	-1.88653	-1.01312
WBGene00005181	-1.87274	-1.46292
WBGene00043980	-1.87146	-1.3139
WBGene00010998	-1.86757	-1.85272
WBGene00008002	-1.86481	-1.6514
WBGene00020509	-1.84563	-1.72024
WBGene00004052	-1.84158	-1.54983
WBGene00015537	-1.83491	-1.47949
WBGene00015216	-1.82151	-2.48639
WBGene00044953	-1.81049	-1.58492
WBGene00016425	-1.80083	-2.33583
WBGene00044457	-1.79208	-2.21767
WBGene00015227	-1.78896	-1.72888
WBGene00006775	-1.7732	-2.98489
WBGene00010833	-1.77101	-1.39185
WBGene00012028	-1.77056	-1.09893
WBGene00005180	-1.76847	-1.079
WBGene00022096	-1.76388	-1.69459
WBGene00017754	-1.75874	-1.91109
WBGene00010752	-1.75398	-1.01696
WBGene00008858	-1.73712	-1.59183
WBGene00014955	-1.73196	-1.12938
WBGene00020364	-1.73052	-1.0846
WBGene00194985	-1.72673	-1.38589
WBGene00018823	-1.71502	-1.67405
WBGene00013531	-1.70256	-1.18877
WBGene00044787	-1.70038	-1.5746
WBGene00021862	-1.69808	-1.14418
WBGene00018568	-1.69357	-1.84942
WBGene00017420	-1.69111	-1.30197
WBGene00044723	-1.68182	-1.37878
WBGene00001828	-1.68147	-2.70667
WBGene00005271	-1.66907	-1.03828
WBGene00001577	-1.64139	-1.70685
WBGene00010285	-1.64013	-1.2712
WBGene00007370	-1.63807	-1.8549
WBGene00013334	-1.6235	-1.75592
WBGene00015013	-1.62211	-1.10918
WBGene00018352	-1.62101	-1.05077
WBGene00011539	-1.62002	-1.63679
WBGene00044773	-1.61815	-1.51722
WBGene00013855	-1.61627	-1.28757
WBGene00044534	-1.61507	-2.01652
WBGene00045414	-1.61327	-1.45964
WBGene00012070	-1.609	-1.67097
WBGene00010375	-1.60644	-1.22338
WBGene00006627	-1.60267	-2.21444
WBGene00021986	-1.59989	-1.57117
WBGene00016924	-1.59049	-1.39715
WBGene00002188	-1.58852	-1.20047
WBGene00017258	-1.58755	-1.53882
WBGene00016788	-1.58432	-1.39859
WBGene00045245	-1.57637	-1.29593
WBGene00002021	-1.57576	-1.66719
WBGene00015600	-1.57524	-1.79668
WBGene00013931	-1.5737	-1.20055
WBGene00020774	-1.56622	-1.13203
WBGene00015599	-1.56096	-2.11452
WBGene00022083	-1.55871	-1.75523
WBGene00013574	-1.55562	-1.03447
WBGene00008862	-1.55296	-1.61672
WBGene00004855	-1.55293	-1.58786
WBGene00012212	-1.54439	-1.36324
WBGene00008113	-1.54223	-1.36024
WBGene00012237	-1.5416	-1.05114
WBGene00269355	-1.53983	-1.05719
WBGene00007097	-1.53113	-2.87492
WBGene00045261	-1.53098	-1.34359
WBGene00009295	-1.53006	-1.01399
WBGene00235094	-1.52934	-1.3147
WBGene00021339	-1.52628	-1.31532
WBGene00018521	-1.52033	-1.64195
WBGene00086568	-1.5183	-1.63666
WBGene00020455	-1.51813	-1.18964
WBGene00005228	-1.51775	-1.6028
WBGene00017018	-1.51059	-1.16043
WBGene00023345	-1.5101	-1.33335
WBGene00011052	-1.50553	-1.77803
WBGene00138721	-1.50408	-1.96939
WBGene00018273	-1.50061	-1.48673
WBGene00021256	-1.49705	-1.21469
WBGene00045268	-1.49349	-1.43138
WBGene00020946	-1.489	-2.91441
WBGene00011812	-1.48823	-1.35838
WBGene00020183	-1.48041	-1.17051
WBGene00002052	-1.47006	-1.80508
WBGene00016193	-1.4695	-1.00681
WBGene00015055	-1.46716	-1.32095
WBGene00013763	-1.45576	-1.0999
WBGene00011672	-1.45449	-1.11865
WBGene00018295	-1.45416	-1.09971
WBGene00015748	-1.44876	-1.48123
WBGene00022283	-1.44745	-1.44685
WBGene00023407	-1.44344	-1.05547
WBGene00009490	-1.44013	-1.36023
WBGene00021081	-1.43629	-1.75065
WBGene00015012	-1.43477	-1.24932
WBGene00219208	-1.43388	-1.18779
WBGene00002024	-1.41109	-1.48588
WBGene00000013	-1.40773	-1.18526
WBGene00012398	-1.38947	-2.01102
WBGene00013440	-1.38081	-1.28549
WBGene00020021	-1.3696	-1.74509
WBGene00012867	-1.3667	-1.31905
WBGene00001475	-1.36359	-1.55565
WBGene00010134	-1.36203	-1.14387
WBGene00018215	-1.36123	-2.46671
WBGene00009901	-1.35949	-1.40751
WBGene00206361	-1.35355	-1.21427
WBGene00045473	-1.35059	-1.24646
WBGene00021487	-1.35058	-1.01812
WBGene00021121	-1.35056	-1.926
WBGene00010899	-1.34857	-1.37988
WBGene00077525	-1.34646	-1.04011
WBGene00010348	-1.34546	-1.3761
WBGene00045416	-1.34538	-1.60179
WBGene00010539	-1.34415	-1.43129
WBGene00013704	-1.34113	-1.04561
WBGene00003167	-1.339	-1.29458
WBGene00008099	-1.33888	-1.22323
WBGene00001551	-1.33043	-1.39224
WBGene00018607	-1.32564	-1.20462
WBGene00017421	-1.32197	-1.13876
WBGene00008485	-1.31901	-1.36933
WBGene00022821	-1.31887	-1.09263
WBGene00008922	-1.31206	-1.44598
WBGene00015884	-1.30323	-1.04253
WBGene00021543	-1.29967	-1.26709
WBGene00015388	-1.2976	-1.54593
WBGene00017529	-1.29608	-1.36101
WBGene00011713	-1.28847	-1.41029
WBGene00008323	-1.28446	-1.07003
WBGene00008559	-1.27736	-1.31992
WBGene00019662	-1.2743	-1.67263
WBGene00018242	-1.27263	-1.96456
WBGene00007755	-1.27203	-1.01899
WBGene00020080	-1.27153	-1.62635
WBGene00020357	-1.27018	-1.22571
WBGene00009816	-1.2684	-1.16902
WBGene00015936	-1.26635	-1.00671
WBGene00045456	-1.26304	-1.09238
WBGene00044213	-1.26189	-1.19653
WBGene00009158	-1.26044	-1.46926
WBGene00007899	-1.25977	-1.12189
WBGene00022441	-1.25765	-1.52117
WBGene00018225	-1.25613	-1.07244
WBGene00016360	-1.25314	-1.10439
WBGene00019547	-1.2517	-1.51609
WBGene00016958	-1.25007	-1.48848
WBGene00044772	-1.2488	-1.72769
WBGene00007458	-1.24709	-1.29792
WBGene00045038	-1.24624	-1.11686
WBGene00022545	-1.23785	-1.12158
WBGene00044402	-1.23614	-1.12422
WBGene00012592	-1.2324	-1.16917
WBGene00010150	-1.23207	-1.24164
WBGene00000367	-1.23188	-1.07956
WBGene00017654	-1.23176	-2.00309
WBGene00019426	-1.22897	-1.91095
WBGene00015966	-1.22847	-1.29359
WBGene00011213	-1.22816	-1.53975
WBGene00015671	-1.22386	-1.33434
WBGene00010822	-1.2226	-1.10044
WBGene00021519	-1.2221	-1.84943
WBGene00011090	-1.22066	-1.12134
WBGene00007375	-1.2205	-1.82863
WBGene00016625	-1.22038	-1.39048
WBGene00003987	-1.22011	-1.17457
WBGene00022891	-1.21594	-1.35229
WBGene00044665	-1.20861	-1.17011
WBGene00019958	-1.20592	-1.15274
WBGene00002085	-1.20328	-1.70074
WBGene00010242	-1.20296	-1.21804
WBGene00007152	-1.20189	-1.20529
WBGene00010694	-1.20183	-1.117
WBGene00021977	-1.19372	-1.23478
WBGene00017535	-1.19291	-1.83258
WBGene00006809	-1.19217	-1.03031
WBGene00021434	-1.19144	-1.22529
WBGene00001476	-1.18707	-1.04448
WBGene00003232	-1.18469	-1.17255
WBGene00007264	-1.1836	-1.28502
WBGene00007725	-1.18241	-1.2011
WBGene00007174	-1.17561	-1.43143
WBGene00021263	-1.17553	-1.64809
WBGene00009296	-1.1729	-1.09891
WBGene00194717	-1.17289	-1.0485
WBGene00002094	-1.16108	-1.32248
WBGene00013181	-1.15942	-1.14617
WBGene00044120	-1.15783	-1.03408
WBGene00016735	-1.15283	-1.22626
WBGene00006927	-1.15215	-2.36363
WBGene00021698	-1.14095	-1.13685
WBGene00194708	-1.14042	-1.00049
WBGene00010686	-1.13667	-1.47501
WBGene00008301	-1.13566	-2.08084
WBGene00044680	-1.13509	-1.11305
WBGene00008926	-1.13497	-1.32061
WBGene00044350	-1.1323	-1.3521
WBGene00006467	-1.12465	-1.34854
WBGene00019859	-1.12283	-1.07658
WBGene00020229	-1.12172	-1.25862
WBGene00013506	-1.12073	-1.0103
WBGene00006372	-1.11863	-1.30675
WBGene00009887	-1.11612	-1.03984
WBGene00010538	-1.10464	-1.2309
WBGene00011587	-1.10012	-1.41845
WBGene00009830	-1.09844	-1.155
WBGene00022847	-1.09588	-1.17455
WBGene00019174	-1.09546	-1.19386
WBGene00019957	-1.09009	-1.08971
WBGene00012381	-1.08664	-1.05072
WBGene00006929	-1.07672	-1.78758
WBGene00007992	-1.07392	-3.03605
WBGene00007748	-1.07146	-1.04528
WBGene00269392	-1.07114	-1.13998
WBGene00006649	-1.07055	-1.8218
WBGene00021048	-1.06884	-1.22394
WBGene00007372	-1.06686	-1.28218
WBGene00001564	-1.06504	-1.11513
WBGene00010644	-1.06386	-1.0102
WBGene00015602	-1.06191	-1.47927
WBGene00008234	-1.05442	-1.13998
WBGene00013653	-1.05352	-1.20199
WBGene00008091	-1.04541	-1.09324
WBGene00011321	-1.04532	-1.39391
WBGene00015362	-1.04375	-1.43718
WBGene00022478	-1.0399	-1.1706
WBGene00012822	-1.03962	-1.07017
WBGene00015934	-1.03636	-1.0795
WBGene00006470	-1.03228	-1.01678
WBGene00017361	-1.02705	-1.25641
WBGene00018921	-1.02233	-1.13547
WBGene00015479	-1.02031	-1.00919
WBGene00017467	-1.01911	-1.09931
WBGene00021079	-1.01614	-1.05358
WBGene00007440	-1.01303	-1.96659
WBGene00019057	-1.00546	-1.09031
WBGene00194695	-1.00097	-1.00693
WBGene00018971	-1.00064	-1.40589

## Sheet: simr-1 25C gen2 up
Supplementary File 5, Sheet 7: mRNAs significantly up-regulated 2 fold or greater in simr-1 mutant animals at 25ºC for two generations.
Gene name	log2FoldChange (relative to wt gen1)	log2FoldChange (relative to wt gen2)
WBGene00044109	7.62144	4.39936
WBGene00010474	7.11101	2.38657
WBGene00021731	7.09707	3.17036
WBGene00015997	6.87439	2.60894
WBGene00011172	6.79212	5.82184
WBGene00000734	6.76109	3.94967
WBGene00021627	6.67763	4.35582
WBGene00019459	6.64203	2.30538
WBGene00000596	6.63804	5.52085
WBGene00014997	6.56411	2.69636
WBGene00012402	6.36386	3.24934
WBGene00013712	6.34315	2.83289
WBGene00000707	6.18002	3.97943
WBGene00021620	6.04931	2.86853
WBGene00012401	5.99695	4.65407
WBGene00007543	5.96325	4.48303
WBGene00006719	5.92742	2.65603
WBGene00018497	5.91498	3.74417
WBGene00013194	5.8731	2.13348
WBGene00000613	5.86236	4.16972
WBGene00001782	5.84389	3.721
WBGene00016299	5.83836	4.96316
WBGene00021786	5.83617	2.89856
WBGene00194935	5.83481	2.45877
WBGene00008001	5.82918	2.75563
WBGene00000663	5.80935	4.41392
WBGene00011295	5.7708	2.14146
WBGene00000606	5.74173	4.20979
WBGene00015890	5.72476	2.92889
WBGene00014062	5.69516	3.20694
WBGene00004394	5.67951	3.79144
WBGene00013337	5.64178	3.28445
WBGene00001074	5.63531	3.81576
WBGene00013886	5.57286	2.66824
WBGene00000639	5.54122	4.1544
WBGene00013657	5.5398	3.07283
WBGene00000684	5.50269	2.85387
WBGene00009753	5.47829	3.11277
WBGene00235254	5.40659	4.07111
WBGene00013800	5.39905	2.56609
WBGene00000649	5.39875	4.22603
WBGene00022763	5.35154	3.20294
WBGene00018493	5.31894	4.72556
WBGene00014183	5.31473	6.57427
WBGene00012761	5.30834	2.73056
WBGene00013823	5.29507	2.2676
WBGene00017555	5.28635	1.91714
WBGene00000602	5.2577	3.8179
WBGene00010247	5.25312	2.74061
WBGene00007049	5.23117	2.11931
WBGene00016885	5.2282	2.32164
WBGene00000930	5.21185	2.42682
WBGene00021889	5.20453	2.42045
WBGene00001695	5.20229	4.34769
WBGene00007570	5.18114	3.18629
WBGene00014239	5.17113	2.83098
WBGene00017672	5.15891	2.82238
WBGene00012509	5.15813	3.18691
WBGene00014127	5.1531	2.78609
WBGene00008497	5.14629	2.49505
WBGene00015879	5.13386	2.63035
WBGene00013452	5.12873	2.67235
WBGene00022833	5.122	3.80606
WBGene00013951	5.1105	2.92047
WBGene00044805	5.10191	2.68266
WBGene00016413	5.09867	3.94883
WBGene00000657	5.08718	3.23833
WBGene00013810	5.07766	3.04939
WBGene00011178	5.07105	4.4728
WBGene00010612	5.06768	2.70021
WBGene00017056	5.06675	2.36085
WBGene00018123	5.06229	3.25979
WBGene00077682	5.03908	2.5081
WBGene00003466	5.02679	2.9421
WBGene00018168	5.02129	2.78353
WBGene00010377	5.01854	3.49605
WBGene00013888	5.01854	3.49605
WBGene00012609	5.00585	2.67637
WBGene00045180	5.00546	2.86102
WBGene00013085	5.00131	3.09308
WBGene00001067	4.99583	4.10697
WBGene00000256	4.9813	4.31766
WBGene00018528	4.95956	2.51996
WBGene00001066	4.94321	3.65871
WBGene00206368	4.93396	3.40595
WBGene00010114	4.92935	3.33845
WBGene00044393	4.92429	3.1089
WBGene00009326	4.90655	3.89034
WBGene00004397	4.90607	4.38809
WBGene00017629	4.88527	4.28429
WBGene00019026	4.87907	2.67974
WBGene00008575	4.86818	3.35656
WBGene00009502	4.8487	2.98396
WBGene00013684	4.83755	2.64753
WBGene00021109	4.83585	3.35953
WBGene00004144	4.79516	3.62765
WBGene00001944	4.79097	3.08678
WBGene00000697	4.78523	4.24393
WBGene00008312	4.7814	2.54231
WBGene00021967	4.77185	3.76875
WBGene00235383	4.76374	4.03575
WBGene00000689	4.75907	2.79444
WBGene00016839	4.73801	3.65266
WBGene00044333	4.73573	3.27685
WBGene00020978	4.73219	2.01625
WBGene00003437	4.72262	1.97691
WBGene00013656	4.71374	2.82392
WBGene00020656	4.71323	1.97927
WBGene00006052	4.70992	2.66032
WBGene00008381	4.70225	3.60104
WBGene00008650	4.69631	1.84254
WBGene00004962	4.69428	3.17283
WBGene00003424	4.68591	3.24019
WBGene00000614	4.68294	3.27241
WBGene00044272	4.67456	3.62359
WBGene00010883	4.66421	2.6034
WBGene00016447	4.65614	3.00832
WBGene00019951	4.65592	2.09265
WBGene00000667	4.65504	2.13355
WBGene00000703	4.65495	2.88426
WBGene00012547	4.64615	3.5619
WBGene00015629	4.64389	3.33591
WBGene00235359	4.64367	2.21007
WBGene00016358	4.64269	3.08121
WBGene00013887	4.64088	3.56417
WBGene00022760	4.63552	3.31558
WBGene00195010	4.63356	4.18263
WBGene00000732	4.63221	2.20372
WBGene00017542	4.62687	3.13895
WBGene00011401	4.62188	3.28537
WBGene00044384	4.62035	2.4738
WBGene00020715	4.61842	3.02141
WBGene00044273	4.59802	3.92383
WBGene00044274	4.59802	3.92383
WBGene00003431	4.59381	3.26933
WBGene00010373	4.58733	2.26379
WBGene00016058	4.57648	3.10039
WBGene00009682	4.57619	3.21634
WBGene00021690	4.56348	4.5245
WBGene00008649	4.56306	2.92144
WBGene00010547	4.56137	2.80843
WBGene00004901	4.55668	3.22435
WBGene00006044	4.55414	2.64015
WBGene00017058	4.54676	2.85303
WBGene00020177	4.53917	2.60319
WBGene00007792	4.53908	2.43254
WBGene00009463	4.53794	2.67444
WBGene00009193	4.53598	2.41265
WBGene00008811	4.53343	2.82535
WBGene00016658	4.53325	2.16528
WBGene00002227	4.53267	2.82699
WBGene00014157	4.53083	2.70868
WBGene00000748	4.52807	2.9549
WBGene00015628	4.52384	3.93586
WBGene00010381	4.5133	3.33973
WBGene00015689	4.50977	2.35217
WBGene00022157	4.50794	2.57518
WBGene00000252	4.50751	3.74229
WBGene00015051	4.50503	2.66319
WBGene00000612	4.47785	3.89511
WBGene00044754	4.47328	4.83783
WBGene00009890	4.47068	2.46769
WBGene00022064	4.46575	3.25804
WBGene00014029	4.46373	2.16696
WBGene00018926	4.45865	3.01412
WBGene00009470	4.45312	3.04034
WBGene00006049	4.44962	3.01144
WBGene00020071	4.4487	3.34966
WBGene00010876	4.44777	3.27992
WBGene00019949	4.44692	3.00361
WBGene00015994	4.44637	2.39215
WBGene00016843	4.44272	2.8989
WBGene00018359	4.44206	2.73336
WBGene00007308	4.44172	2.94853
WBGene00021993	4.44023	3.11111
WBGene00009693	4.43939	4.80803
WBGene00021141	4.43615	1.4553
WBGene00235297	4.43445	2.11498
WBGene00020609	4.43024	2.97143
WBGene00000638	4.42427	2.44652
WBGene00000712	4.42377	2.698
WBGene00008448	4.42185	3.33324
WBGene00007209	4.42045	2.95558
WBGene00009413	4.41458	2.93383
WBGene00007714	4.41148	2.93183
WBGene00013170	4.40391	2.80279
WBGene00017386	4.40311	2.90696
WBGene00005017	4.4016	3.30471
WBGene00011491	4.39293	2.97528
WBGene00008487	4.39264	2.51467
WBGene00008874	4.39244	1.60031
WBGene00013999	4.39004	2.96309
WBGene00022630	4.38451	4.74872
WBGene00021154	4.38361	2.63196
WBGene00018284	4.38124	3.27362
WBGene00010633	4.37867	2.84614
WBGene00019964	4.36536	4.73412
WBGene00020282	4.36408	2.31867
WBGene00020598	4.36029	2.83592
WBGene00007337	4.35591	2.7914
WBGene00020070	4.35031	3.18073
WBGene00000676	4.34991	2.89161
WBGene00003435	4.34672	2.94649
WBGene00010705	4.34232	1.5706
WBGene00003442	4.33819	3.07968
WBGene00011533	4.33768	3.32759
WBGene00003434	4.33687	2.93352
WBGene00013526	4.33301	2.86592
WBGene00016462	4.33272	2.88532
WBGene00019062	4.33071	3.55352
WBGene00006048	4.32539	2.86182
WBGene00004904	4.32519	3.00647
WBGene00013651	4.30827	1.77556
WBGene00015026	4.30542	2.39458
WBGene00002206	4.29967	3.52373
WBGene00194647	4.2986	3.32625
WBGene00008754	4.29125	2.66432
WBGene00009269	4.28875	2.3601
WBGene00003432	4.28846	2.87762
WBGene00003456	4.28712	3.55483
WBGene00001603	4.28419	2.64992
WBGene00012294	4.28284	3.02769
WBGene00007274	4.28207	2.62714
WBGene00003438	4.28193	2.89008
WBGene00015192	4.27618	3.19003
WBGene00018120	4.27565	2.7142
WBGene00022754	4.27492	2.92544
WBGene00020860	4.26838	2.77173
WBGene00016675	4.26795	2.9873
WBGene00000653	4.26665	3.79395
WBGene00012637	4.26558	2.74034
WBGene00021006	4.26403	2.44652
WBGene00077685	4.26057	3.03885
WBGene00018004	4.25698	3.75913
WBGene00017059	4.25659	2.76685
WBGene00010682	4.2539	2.06519
WBGene00015762	4.25156	4.61718
WBGene00003457	4.25123	3.19079
WBGene00000617	4.25015	2.06614
WBGene00018082	4.24903	2.03058
WBGene00017325	4.24797	2.68523
WBGene00017978	4.24746	3.0177
WBGene00019531	4.24338	2.55286
WBGene00019165	4.24181	2.76163
WBGene00014100	4.23826	2.87105
WBGene00011669	4.23676	2.89251
WBGene00016541	4.23613	3.01461
WBGene00018480	4.23445	3.10584
WBGene00008821	4.22977	2.26351
WBGene00000626	4.22947	4.07553
WBGene00012249	4.2291	2.41498
WBGene00013449	4.22587	2.36861
WBGene00006051	4.2257	2.67623
WBGene00022751	4.21346	2.94327
WBGene00007306	4.21249	2.76899
WBGene00007987	4.20703	2.81228
WBGene00016752	4.20192	3.05157
WBGene00255375	4.20094	3.13788
WBGene00008230	4.20043	2.85019
WBGene00017172	4.18706	3.72232
WBGene00003429	4.18465	3.0941
WBGene00044896	4.18208	4.55255
WBGene00015627	4.18036	3.38354
WBGene00009550	4.17938	3.31092
WBGene00077576	4.17706	3.16893
WBGene00015820	4.17563	2.46256
WBGene00012912	4.17453	2.90147
WBGene00013858	4.17399	2.94054
WBGene00022705	4.16613	2.91094
WBGene00013521	4.16549	3.23214
WBGene00011841	4.16325	2.52592
WBGene00011472	4.15926	4.52252
WBGene00013854	4.15558	2.40221
WBGene00206358	4.15513	3.80196
WBGene00011549	4.15456	3.79779
WBGene00015348	4.15438	3.15256
WBGene00015690	4.15206	3.94275
WBGene00015024	4.15156	3.03506
WBGene00020140	4.15083	2.88321
WBGene00014665	4.14975	3.07367
WBGene00020990	4.14806	3.10171
WBGene00007307	4.14274	2.91568
WBGene00016398	4.13998	3.86217
WBGene00009344	4.13961	2.89653
WBGene00009016	4.13736	2.89461
WBGene00009941	4.13574	3.28554
WBGene00006057	4.13423	2.86956
WBGene00016357	4.13389	3.13493
WBGene00015661	4.13176	2.36546
WBGene00003469	4.12814	2.92135
WBGene00018548	4.12667	2.76239
WBGene00015685	4.12219	2.64413
WBGene00011132	4.12208	3.09113
WBGene00019024	4.11903	3.1492
WBGene00050879	4.11756	2.91633
WBGene00008590	4.11678	2.95633
WBGene00020905	4.11504	3.43328
WBGene00008383	4.11405	2.88627
WBGene00012638	4.1138	2.77866
WBGene00009321	4.11308	2.75926
WBGene00015030	4.11212	2.41618
WBGene00015944	4.10789	3.28809
WBGene00016072	4.10725	3.45176
WBGene00010512	4.1054	1.32781
WBGene00013771	4.10525	2.90209
WBGene00006053	4.1046	2.99026
WBGene00077450	4.10141	3.26862
WBGene00003425	4.09893	2.45854
WBGene00011790	4.09877	2.64088
WBGene00020350	4.09422	2.81074
WBGene00009501	4.09188	3.45325
WBGene00012871	4.0907	2.66487
WBGene00013785	4.09006	2.81649
WBGene00007538	4.08828	3.41474
WBGene00015241	4.0861	3.11064
WBGene00011469	4.08514	2.58883
WBGene00017872	4.08497	4.46161
WBGene00006509	4.08382	2.605
WBGene00003426	4.08359	2.73813
WBGene00003467	4.08125	2.62973
WBGene00000729	4.0808	3.10343
WBGene00010651	4.07912	2.97106
WBGene00002204	4.07704	2.63397
WBGene00011968	4.07493	2.98045
WBGene00012809	4.07462	2.63923
WBGene00012855	4.07044	2.76965
WBGene00016351	4.06773	3.22531
WBGene00008950	4.06225	2.62659
WBGene00021787	4.06171	2.8734
WBGene00015987	4.06017	2.40062
WBGene00021113	4.06007	2.84494
WBGene00015855	4.05802	3.18887
WBGene00014168	4.05676	3.01919
WBGene00004398	4.0565	4.02156
WBGene00009031	4.0533	3.09918
WBGene00017553	4.05279	2.53328
WBGene00001729	4.0503	4.51331
WBGene00015688	4.04987	3.02543
WBGene00012207	4.04924	2.6899
WBGene00018081	4.0488	3.21205
WBGene00011909	4.04818	1.75098
WBGene00011133	4.04649	3.79014
WBGene00018119	4.0437	2.32049
WBGene00012549	4.04304	3.16745
WBGene00010254	4.03971	3.10122
WBGene00007610	4.03882	2.79659
WBGene00008313	4.03469	3.05279
WBGene00016707	4.03344	2.94359
WBGene00014240	4.03332	2.88483
WBGene00269394	4.03274	3.25442
WBGene00009681	4.0293	2.92627
WBGene00005012	4.02713	2.63484
WBGene00194715	4.027	4.40719
WBGene00044475	4.02145	3.31188
WBGene00006631	4.02087	4.39106
WBGene00009714	4.02028	3.22726
WBGene00019920	4.02006	2.83588
WBGene00194787	4.01947	2.95256
WBGene00077582	4.01654	4.38152
WBGene00015929	4.01348	2.91731
WBGene00014102	4.01203	2.99868
WBGene00219326	4.01133	2.89443
WBGene00013956	4.00817	3.06387
WBGene00003449	4.00791	2.66147
WBGene00016161	4.00455	2.56496
WBGene00010241	4.00448	2.89753
WBGene00000719	4.00329	3.72881
WBGene00018895	4.00151	3.04596
WBGene00015246	3.99863	2.27032
WBGene00012123	3.99605	1.98419
WBGene00045508	3.99368	4.36341
WBGene00007156	3.99087	3.03671
WBGene00011176	3.9892	3.15153
WBGene00015198	3.98868	4.43118
WBGene00007478	3.98532	3.38481
WBGene00011214	3.98517	2.95264
WBGene00050915	3.98391	2.62831
WBGene00016950	3.98196	4.34605
WBGene00008661	3.98097	2.27752
WBGene00022143	3.97823	3.38492
WBGene00018631	3.97823	3.10058
WBGene00012087	3.97769	2.65904
WBGene00014201	3.97635	2.56868
WBGene00011120	3.9699	3.02069
WBGene00011290	3.96764	2.31991
WBGene00022652	3.96584	2.47111
WBGene00000694	3.96364	3.24193
WBGene00012169	3.96328	2.85205
WBGene00009684	3.96319	2.89705
WBGene00015572	3.95907	2.7568
WBGene00013474	3.95607	2.65761
WBGene00043743	3.95579	3.14212
WBGene00008772	3.94552	3.8557
WBGene00022006	3.94389	2.52345
WBGene00022007	3.94389	2.52345
WBGene00020435	3.94336	2.59338
WBGene00016414	3.94291	2.53992
WBGene00012159	3.94246	4.31041
WBGene00017729	3.94049	2.38638
WBGene00018135	3.93945	2.75093
WBGene00015034	3.93818	3.44639
WBGene00021398	3.93505	2.92185
WBGene00020873	3.93263	1.89982
WBGene00003443	3.92976	2.94378
WBGene00016327	3.92969	2.69458
WBGene00003463	3.92723	2.44103
WBGene00010574	3.92567	3.03702
WBGene00012012	3.92429	2.71734
WBGene00000718	3.92334	3.99971
WBGene00018296	3.92134	2.76062
WBGene00006040	3.91957	2.43044
WBGene00008235	3.91558	2.75313
WBGene00020986	3.91369	1.57585
WBGene00007190	3.91037	2.59919
WBGene00014174	3.90763	3.45801
WBGene00016440	3.90514	2.81714
WBGene00003458	3.90148	1.51525
WBGene00017636	3.90083	2.3525
WBGene00022090	3.90068	2.86323
WBGene00019430	3.89922	3.0144
WBGene00009581	3.89801	3.1038
WBGene00019081	3.89439	3.62871
WBGene00011114	3.89315	2.56297
WBGene00010249	3.89262	2.91282
WBGene00010123	3.88983	2.46562
WBGene00012379	3.88977	2.56051
WBGene00010014	3.88883	3.81288
WBGene00016399	3.8884	2.75304
WBGene00018563	3.88757	2.67032
WBGene00010900	3.88701	2.72051
WBGene00007335	3.88069	1.87676
WBGene00008063	3.87963	3.20244
WBGene00014857	3.87942	2.6348
WBGene00002186	3.878	2.44194
WBGene00044744	3.87638	2.77687
WBGene00016577	3.8746	2.04245
WBGene00044476	3.87076	3.1957
WBGene00007584	3.8701	2.67184
WBGene00021579	3.86979	2.90369
WBGene00021537	3.86977	2.71769
WBGene00045306	3.86775	3.61366
WBGene00044633	3.86106	2.57348
WBGene00195227	3.8602	2.64439
WBGene00017853	3.85851	2.85326
WBGene00016680	3.85622	2.69904
WBGene00011027	3.85583	2.68569
WBGene00007461	3.85329	2.09355
WBGene00020659	3.85255	2.16996
WBGene00008433	3.85142	2.96942
WBGene00003446	3.85061	2.39528
WBGene00008724	3.84911	2.87426
WBGene00013192	3.84576	2.80468
WBGene00012595	3.83975	2.95657
WBGene00003470	3.83851	3.10085
WBGene00007081	3.83848	2.82433
WBGene00010265	3.83411	2.36154
WBGene00016420	3.83077	3.18777
WBGene00012937	3.82972	3.22611
WBGene00008154	3.82893	2.29441
WBGene00012679	3.82792	1.55189
WBGene00011134	3.82771	2.21601
WBGene00011462	3.82526	3.07896
WBGene00011795	3.82216	2.8556
WBGene00019561	3.81829	2.3404
WBGene00000655	3.81489	3.22477
WBGene00007179	3.81483	2.08483
WBGene00019119	3.81323	3.61386
WBGene00013148	3.81288	3.30216
WBGene00194703	3.81146	2.83474
WBGene00018652	3.8089	4.27035
WBGene00014247	3.80807	2.95592
WBGene00021996	3.80681	2.70811
WBGene00007448	3.80421	2.74402
WBGene00014007	3.80365	2.82012
WBGene00018122	3.80196	2.58393
WBGene00044388	3.79887	3.17121
WBGene00022507	3.78974	2.90652
WBGene00019626	3.7872	3.00603
WBGene00017902	3.78352	3.22005
WBGene00004909	3.78207	2.28502
WBGene00014660	3.77811	2.459
WBGene00016288	3.77568	2.87976
WBGene00022094	3.77163	4.73861
WBGene00016053	3.77083	2.58672
WBGene00013723	3.76645	2.67669
WBGene00016481	3.7647	4.47665
WBGene00006449	3.7641	2.73512
WBGene00006056	3.7623	2.85675
WBGene00011336	3.75708	2.34534
WBGene00020356	3.75707	2.65093
WBGene00006050	3.75628	2.21579
WBGene00015305	3.75538	2.98597
WBGene00018301	3.75461	2.67858
WBGene00019406	3.75384	3.07484
WBGene00194894	3.74854	2.85403
WBGene00008124	3.74718	4.02544
WBGene00044122	3.74649	2.94939
WBGene00015917	3.7455	3.25467
WBGene00017114	3.74443	2.1558
WBGene00009548	3.74133	2.93095
WBGene00020840	3.7412	2.90914
WBGene00013138	3.73921	1.8357
WBGene00014996	3.73778	3.22521
WBGene00014104	3.73548	2.64948
WBGene00086554	3.73535	3.32432
WBGene00020223	3.73375	2.52177
WBGene00020414	3.73344	2.92218
WBGene00013089	3.73219	4.09771
WBGene00022707	3.72799	2.94245
WBGene00008725	3.72784	3.78875
WBGene00017387	3.72778	2.7426
WBGene00013696	3.7251	2.95927
WBGene00013473	3.72408	2.79868
WBGene00000771	3.72217	2.01499
WBGene00007323	3.72097	2.7504
WBGene00194869	3.71846	2.20126
WBGene00011467	3.71678	2.27711
WBGene00007159	3.71579	2.7514
WBGene00020072	3.70958	3.09458
WBGene00010091	3.70692	2.80293
WBGene00020713	3.70529	2.67285
WBGene00008556	3.70344	2.74538
WBGene00015210	3.70284	2.59175
WBGene00019086	3.7028	2.49358
WBGene00006038	3.69927	2.74696
WBGene00077563	3.6938	2.68492
WBGene00018380	3.69211	2.77389
WBGene00017851	3.69089	3.04673
WBGene00016312	3.68897	2.60959
WBGene00003464	3.68194	2.44649
WBGene00011910	3.6819	2.55552
WBGene00007301	3.67939	2.67852
WBGene00022890	3.67486	2.94972
WBGene00044474	3.67484	2.61315
WBGene00019267	3.6734	2.409
WBGene00007169	3.67312	2.43491
WBGene00001703	3.67239	3.49348
WBGene00007613	3.671	2.34036
WBGene00020353	3.67004	2.71854
WBGene00018178	3.66958	2.71536
WBGene00004084	3.66537	3.0096
WBGene00011619	3.65304	3.28392
WBGene00000698	3.65071	1.1157
WBGene00020913	3.64954	2.14452
WBGene00013290	3.64804	2.65432
WBGene00022888	3.64496	2.51976
WBGene00011378	3.64424	2.27696
WBGene00013834	3.64422	2.99965
WBGene00007735	3.64415	1.88736
WBGene00010679	3.64235	3.2594
WBGene00017376	3.64196	1.75434
WBGene00016339	3.64181	2.73083
WBGene00015094	3.64174	2.97249
WBGene00009377	3.63846	3.07358
WBGene00020841	3.63791	3.12782
WBGene00044810	3.63548	1.97064
WBGene00018525	3.63431	2.82508
WBGene00018530	3.63431	2.82508
WBGene00016388	3.63256	3.07261
WBGene00022541	3.62851	2.61355
WBGene00008074	3.62757	2.56653
WBGene00009708	3.62453	2.5316
WBGene00015931	3.62446	2.57818
WBGene00017955	3.62357	3.14028
WBGene00022778	3.62346	2.50308
WBGene00003465	3.62299	2.48653
WBGene00012741	3.62201	3.2352
WBGene00012781	3.62055	2.2604
WBGene00018580	3.61825	1.79875
WBGene00000735	3.61595	3.76088
WBGene00007503	3.61517	1.95667
WBGene00050956	3.61364	2.74201
WBGene00010486	3.61292	2.98895
WBGene00018158	3.61171	2.24251
WBGene00010763	3.60836	2.63868
WBGene00015907	3.60709	3.06949
WBGene00014169	3.59894	2.485
WBGene00007457	3.59716	2.70504
WBGene00012174	3.59628	3.97331
WBGene00019540	3.59256	1.87938
WBGene00017055	3.59165	3.22179
WBGene00011379	3.5899	2.78525
WBGene00016322	3.58765	2.80949
WBGene00014129	3.58623	3.13435
WBGene00016512	3.58328	3.21787
WBGene00013713	3.57977	2.6526
WBGene00000710	3.57896	2.18311
WBGene00014048	3.57875	2.26429
WBGene00009079	3.5751	2.64019
WBGene00016523	3.57357	3.53071
WBGene00018235	3.57279	2.2796
WBGene00003468	3.57172	2.43727
WBGene00000733	3.56717	1.10637
WBGene00012250	3.5662	3.6277
WBGene00020105	3.56083	2.93422
WBGene00007601	3.55908	2.83912
WBGene00011748	3.55887	2.71253
WBGene00007080	3.55791	3.09744
WBGene00008541	3.55549	2.7375
WBGene00021908	3.55432	2.5997
WBGene00005013	3.55154	2.31005
WBGene00014130	3.55117	3.52869
WBGene00044634	3.54972	2.44277
WBGene00006630	3.5487	5.3519
WBGene00044674	3.54784	2.77337
WBGene00021650	3.54658	2.7335
WBGene00003448	3.5455	2.20298
WBGene00010466	3.54408	2.66368
WBGene00000722	3.54363	2.80701
WBGene00007778	3.54073	3.01055
WBGene00013476	3.54051	3.34605
WBGene00021878	3.53892	2.24256
WBGene00019169	3.53337	3.10197
WBGene00018336	3.53051	2.38707
WBGene00011466	3.5253	2.38254
WBGene00012979	3.52295	2.9532
WBGene00007248	3.51994	2.56047
WBGene00016286	3.51242	2.91736
WBGene00044639	3.5104	3.11896
WBGene00017112	3.50533	2.5391
WBGene00018930	3.50515	3.04319
WBGene00014158	3.50447	2.67015
WBGene00013524	3.50075	2.18514
WBGene00007239	3.49979	2.78092
WBGene00001725	3.49954	3.01809
WBGene00022876	3.4955	2.64621
WBGene00009695	3.48917	3.18371
WBGene00012357	3.48898	2.65306
WBGene00011895	3.48685	3.29714
WBGene00020991	3.48597	1.99363
WBGene00050916	3.47549	5.70732
WBGene00022709	3.47449	2.04982
WBGene00021454	3.47373	3.9207
WBGene00021720	3.47116	2.83926
WBGene00018031	3.47098	2.32366
WBGene00077519	3.4709	2.64717
WBGene00010760	3.46933	2.92633
WBGene00009185	3.46602	2.61952
WBGene00017384	3.46511	2.60139
WBGene00012173	3.46365	2.95186
WBGene00018332	3.4616	3.08842
WBGene00013186	3.46064	2.69295
WBGene00010869	3.46051	2.98204
WBGene00012905	3.45885	2.4456
WBGene00044679	3.4576	1.72276
WBGene00015892	3.45666	3.15581
WBGene00010992	3.45446	2.98928
WBGene00003445	3.45289	2.13181
WBGene00019530	3.45065	2.91113
WBGene00007793	3.45059	2.83545
WBGene00010366	3.45025	2.58394
WBGene00001424	3.4497	2.62896
WBGene00008029	3.4472	2.29865
WBGene00015230	3.44276	3.83938
WBGene00015630	3.43958	3.08032
WBGene00011911	3.43931	2.80275
WBGene00011954	3.43841	2.48571
WBGene00000723	3.43329	1.61865
WBGene00011478	3.43097	2.28457
WBGene00010246	3.42685	2.43815
WBGene00007230	3.42406	2.49554
WBGene00015696	3.42286	2.60922
WBGene00022162	3.42261	2.42438
WBGene00016730	3.42023	2.05245
WBGene00000666	3.42019	4.25759
WBGene00008659	3.41611	2.72978
WBGene00022079	3.41366	3.27226
WBGene00017808	3.41279	2.66353
WBGene00017069	3.41185	3.42356
WBGene00020054	3.40769	2.01014
WBGene00018526	3.40709	3.10407
WBGene00018163	3.40681	3.02532
WBGene00009942	3.40386	2.18188
WBGene00008299	3.40279	2.33284
WBGene00004965	3.40059	2.87859
WBGene00020661	3.40039	2.42441
WBGene00016516	3.39896	3.28387
WBGene00009492	3.3988	2.36007
WBGene00013087	3.39848	2.6396
WBGene00010324	3.3931	3.32448
WBGene00013296	3.39268	2.41043
WBGene00018538	3.39119	2.14966
WBGene00012627	3.38956	3.05064
WBGene00003451	3.38914	2.08459
WBGene00194886	3.38771	4.6579
WBGene00020987	3.38652	2.84758
WBGene00016085	3.38535	2.77337
WBGene00016054	3.3844	2.19645
WBGene00009313	3.38279	3.01705
WBGene00007794	3.38094	2.55455
WBGene00003452	3.38013	2.45009
WBGene00012223	3.37977	2.98328
WBGene00019084	3.37971	2.8001
WBGene00019534	3.37909	2.47608
WBGene00014179	3.3778	2.52401
WBGene00019090	3.37758	2.133
WBGene00020890	3.37594	2.38841
WBGene00043147	3.37485	2.76732
WBGene00014197	3.3696	2.41311
WBGene00009039	3.36799	3.13298
WBGene00019151	3.36373	3.09062
WBGene00009605	3.36302	2.04074
WBGene00021273	3.36238	3.29607
WBGene00021969	3.36067	2.9416
WBGene00013478	3.35709	2.26287
WBGene00019517	3.35629	3.41042
WBGene00022002	3.35576	2.56915
WBGene00020802	3.34933	2.28296
WBGene00013811	3.34654	2.42989
WBGene00010035	3.34617	2.28778
WBGene00013988	3.34235	2.53426
WBGene00019410	3.34125	2.8977
WBGene00012926	3.3401	2.07174
WBGene00012754	3.3398	2.80928
WBGene00007082	3.33846	2.72859
WBGene00011173	3.33503	2.56027
WBGene00017279	3.33455	2.73069
WBGene00021619	3.33197	2.59533
WBGene00000665	3.33099	2.89324
WBGene00011297	3.32726	2.87107
WBGene00013515	3.31452	1.92985
WBGene00020156	3.31403	1.45142
WBGene00020084	3.31291	2.96166
WBGene00044177	3.31253	2.64479
WBGene00017817	3.31158	2.02956
WBGene00020653	3.31089	2.40636
WBGene00000700	3.30961	2.5255
WBGene00000701	3.30961	2.5255
WBGene00006047	3.30693	1.9324
WBGene00014238	3.30375	2.34782
WBGene00012273	3.30278	1.97098
WBGene00009458	3.29816	2.69291
WBGene00010611	3.29754	3.27836
WBGene00022674	3.29733	3.11119
WBGene00017975	3.29638	2.68844
WBGene00015422	3.29433	2.4063
WBGene00021115	3.2941	2.92568
WBGene00206479	3.29099	2.87745
WBGene00001605	3.29034	1.74634
WBGene00016416	3.28992	2.53948
WBGene00016180	3.28974	2.67985
WBGene00018531	3.28969	2.88926
WBGene00009956	3.28961	2.31986
WBGene00002088	3.28622	1.33389
WBGene00012642	3.28117	2.55166
WBGene00009959	3.28041	2.54866
WBGene00007269	3.27937	2.96263
WBGene00007249	3.27832	2.66845
WBGene00003460	3.27736	2.62418
WBGene00011001	3.27705	3.69878
WBGene00020187	3.27534	2.42088
WBGene00021880	3.27505	2.68656
WBGene00044684	3.27431	2.91424
WBGene00015032	3.27174	1.96278
WBGene00022628	3.27156	2.07927
WBGene00010829	3.26988	2.74313
WBGene00195178	3.26903	2.22252
WBGene00007512	3.26475	2.22551
WBGene00006645	3.26055	3.36141
WBGene00006886	3.26014	1.53329
WBGene00006058	3.25773	3.04192
WBGene00008245	3.25694	2.01578
WBGene00009459	3.25614	2.42722
WBGene00009683	3.25522	2.28387
WBGene00017910	3.25186	3.00365
WBGene00008508	3.24888	2.5876
WBGene00235106	3.24671	3.26646
WBGene00007777	3.24621	2.65101
WBGene00019785	3.24486	2.38912
WBGene00012689	3.238	2.31422
WBGene00009401	3.23762	2.12401
WBGene00015908	3.23566	2.56295
WBGene00012010	3.23406	2.93301
WBGene00021625	3.23178	3.44015
WBGene00015467	3.23037	2.36797
WBGene00050940	3.22783	2.12694
WBGene00018496	3.22581	5.39819
WBGene00012840	3.22347	2.129
WBGene00017175	3.2229	3.33974
WBGene00010634	3.22197	2.00882
WBGene00014182	3.22191	5.43144
WBGene00014188	3.22191	5.43144
WBGene00008554	3.22128	1.45737
WBGene00013052	3.22114	4.00452
WBGene00014116	3.21902	2.86718
WBGene00015106	3.21676	2.07012
WBGene00017213	3.2163	2.2056
WBGene00019015	3.21623	2.63192
WBGene00018792	3.21535	2.35991
WBGene00000752	3.21377	1.43495
WBGene00009938	3.21356	1.50295
WBGene00009592	3.21324	3.09376
WBGene00000593	3.20834	2.13953
WBGene00008854	3.20803	1.63969
WBGene00020042	3.20572	3.3603
WBGene00022767	3.19611	1.85981
WBGene00004964	3.19591	2.35388
WBGene00002208	3.19287	2.18542
WBGene00007415	3.18953	2.22719
WBGene00044912	3.18748	3.3329
WBGene00022849	3.18464	2.19391
WBGene00017559	3.18365	2.26997
WBGene00008259	3.17762	2.56317
WBGene00016410	3.17156	2.33415
WBGene00007633	3.17054	2.29955
WBGene00015896	3.16355	2.44184
WBGene00044243	3.16303	2.83343
WBGene00009685	3.16207	2.18707
WBGene00019810	3.16061	2.82691
WBGene00016040	3.15961	2.76044
WBGene00013475	3.15926	2.58724
WBGene00012727	3.15477	1.72487
WBGene00012831	3.15242	2.32243
WBGene00010515	3.14827	1.66985
WBGene00013459	3.14656	1.40321
WBGene00009759	3.14196	3.17105
WBGene00006553	3.13829	2.96652
WBGene00013279	3.13648	1.82615
WBGene00022617	3.12934	3.18499
WBGene00013489	3.12374	1.53401
WBGene00013879	3.11486	2.67784
WBGene00007320	3.11463	2.76469
WBGene00013496	3.11386	2.4385
WBGene00010728	3.11348	2.3275
WBGene00194864	3.11108	2.89243
WBGene00019783	3.11093	2.7795
WBGene00022093	3.10908	1.2064
WBGene00015516	3.10442	2.93878
WBGene00018841	3.10436	2.50903
WBGene00016612	3.10429	2.65696
WBGene00016605	3.10399	2.45239
WBGene00019063	3.10343	3.32681
WBGene00018379	3.09965	2.02709
WBGene00016356	3.09769	2.31574
WBGene00012486	3.091	2.49148
WBGene00019667	3.08955	1.92802
WBGene00013801	3.08822	2.52804
WBGene00018347	3.08588	2.33678
WBGene00016825	3.0857	2.82527
WBGene00004455	3.0846	3.08213
WBGene00008495	3.0845	2.36721
WBGene00016963	3.07896	2.58777
WBGene00021007	3.07173	2.65274
WBGene00006409	3.07128	2.38264
WBGene00000742	3.06439	3.21511
WBGene00013069	3.06151	2.87959
WBGene00019425	3.06115	2.46745
WBGene00022680	3.06099	3.5686
WBGene00018134	3.05993	2.14219
WBGene00011808	3.05981	1.96936
WBGene00194711	3.05805	2.53502
WBGene00016954	3.05655	2.17961
WBGene00206357	3.05233	1.92461
WBGene00012177	3.04554	3.06458
WBGene00022008	3.04075	3.04325
WBGene00000678	3.03969	2.30431
WBGene00011548	3.03933	3.48114
WBGene00007733	3.03572	2.61547
WBGene00001483	3.0355	2.43603
WBGene00013523	3.03237	2.06302
WBGene00010300	3.02952	2.49075
WBGene00003450	3.02939	2.18031
WBGene00018143	3.0273	2.8257
WBGene00015084	3.02222	2.53219
WBGene00044434	3.02196	2.32656
WBGene00017613	3.01934	1.43823
WBGene00023424	3.01905	3.85669
WBGene00009308	3.01863	2.43112
WBGene00010544	3.01757	2.1635
WBGene00003444	3.01202	2.01806
WBGene00009429	3.0094	2.67327
WBGene00011046	3.00759	2.63591
WBGene00009030	3.00401	1.45402
WBGene00019216	2.99805	1.9706
WBGene00016662	2.99569	2.07028
WBGene00011708	2.9949	1.23003
WBGene00002193	2.99227	2.52181
WBGene00019950	2.98895	1.41979
WBGene00044268	2.98667	2.17342
WBGene00000730	2.98602	2.17395
WBGene00009449	2.98597	2.60162
WBGene00012784	2.98147	3.12336
WBGene00007446	2.98077	2.01645
WBGene00022444	2.97992	1.89083
WBGene00011203	2.97787	2.04526
WBGene00010046	2.97483	2.43127
WBGene00011789	2.97157	3.27211
WBGene00012785	2.96932	2.46688
WBGene00007450	2.967	1.76291
WBGene00019248	2.96494	1.2347
WBGene00015049	2.96434	2.61775
WBGene00003906	2.96256	2.83453
WBGene00007948	2.96077	2.95601
WBGene00194816	2.96021	3.20107
WBGene00014154	2.95888	2.99502
WBGene00017802	2.95865	2.10982
WBGene00020531	2.95818	2.46144
WBGene00021386	2.95262	2.52006
WBGene00015229	2.95026	3.92832
WBGene00000647	2.94924	2.25981
WBGene00016753	2.94725	2.08885
WBGene00006625	2.94539	2.8529
WBGene00009149	2.94434	2.50319
WBGene00009755	2.93869	2.31783
WBGene00045390	2.938	2.27552
WBGene00010136	2.93118	2.64316
WBGene00020293	2.92952	2.22264
WBGene00001245	2.92466	3.2347
WBGene00013700	2.9246	2.07121
WBGene00011164	2.92458	2.46024
WBGene00004971	2.9214	3.41027
WBGene00020988	2.91833	1.62227
WBGene00022753	2.91787	2.69949
WBGene00008797	2.91465	2.84955
WBGene00022443	2.90934	2.22976
WBGene00000672	2.90755	2.88089
WBGene00019229	2.90087	2.73868
WBGene00012636	2.89443	3.11867
WBGene00014121	2.89024	2.35527
WBGene00007378	2.88692	1.45141
WBGene00022622	2.88617	3.77207
WBGene00000251	2.88147	4.1613
WBGene00011262	2.87983	2.41557
WBGene00021968	2.87446	2.83722
WBGene00018121	2.87042	2.54834
WBGene00044777	2.86747	3.82999
WBGene00000759	2.86466	2.39251
WBGene00022649	2.86233	2.2614
WBGene00194700	2.85129	2.65735
WBGene00016433	2.84819	2.2299
WBGene00022512	2.84744	1.76523
WBGene00007381	2.84677	2.67993
WBGene00010874	2.84422	3.00125
WBGene00015937	2.84387	2.35341
WBGene00008743	2.84386	2.16349
WBGene00219315	2.83906	1.98706
WBGene00018999	2.83215	2.08652
WBGene00021608	2.83111	1.80458
WBGene00002055	2.83071	2.52973
WBGene00016807	2.8267	2.60725
WBGene00009028	2.82417	1.19168
WBGene00012913	2.82345	1.61996
WBGene00000720	2.82249	3.38817
WBGene00010933	2.82202	2.86369
WBGene00017550	2.81806	3.62263
WBGene00010719	2.81747	2.54601
WBGene00016346	2.814	1.78227
WBGene00013987	2.81162	2.76417
WBGene00044175	2.81072	2.35248
WBGene00017621	2.81018	1.43026
WBGene00000711	2.80794	2.62296
WBGene00017922	2.8069	2.59416
WBGene00015111	2.79969	1.55342
WBGene00022467	2.79945	2.89298
WBGene00003771	2.79846	1.44129
WBGene00194912	2.79728	2.16202
WBGene00008912	2.79727	2.42539
WBGene00010124	2.79621	2.10812
WBGene00016742	2.79146	2.64152
WBGene00000389	2.79075	2.67381
WBGene00000616	2.78887	2.84626
WBGene00013588	2.78324	1.37573
WBGene00000683	2.78295	3.20043
WBGene00009416	2.78283	2.06994
WBGene00009754	2.7811	2.90895
WBGene00011870	2.77788	2.64292
WBGene00007977	2.77648	2.39594
WBGene00000702	2.77645	3.27968
WBGene00009143	2.7746	2.78606
WBGene00022003	2.77283	2.66549
WBGene00021381	2.75754	2.38948
WBGene00008841	2.75665	2.35187
WBGene00018083	2.75521	2.40675
WBGene00017215	2.75358	2.43726
WBGene00018096	2.75196	1.97302
WBGene00000611	2.75151	1.50014
WBGene00007537	2.75007	3.14079
WBGene00019431	2.74997	2.49353
WBGene00015992	2.74834	2.07343
WBGene00019255	2.74591	2.23283
WBGene00010378	2.74563	2.68338
WBGene00022706	2.74253	1.64464
WBGene00016491	2.73734	2.19522
WBGene00019773	2.73445	2.01076
WBGene00016946	2.72785	1.57859
WBGene00018575	2.72783	2.14675
WBGene00011749	2.72601	2.46356
WBGene00022708	2.72566	2.40992
WBGene00012827	2.72561	2.75748
WBGene00000601	2.72263	2.80965
WBGene00010578	2.72226	1.99589
WBGene00011405	2.72137	2.9169
WBGene00017393	2.7189	1.93971
WBGene00022632	2.7137	2.03435
WBGene00015006	2.7137	2.49376
WBGene00000677	2.71181	1.51971
WBGene00017021	2.71115	1.60097
WBGene00003816	2.70987	3.08945
WBGene00020707	2.70921	2.18407
WBGene00009473	2.70716	3.10803
WBGene00044003	2.70708	2.9488
WBGene00007541	2.70228	3.11863
WBGene00019405	2.70214	3.22136
WBGene00007823	2.70112	2.85331
WBGene00001839	2.69696	2.64182
WBGene00007517	2.69526	1.76698
WBGene00004903	2.69343	3.01739
WBGene00020394	2.69295	1.24586
WBGene00007305	2.69183	2.06776
WBGene00011322	2.69129	3.58492
WBGene00019260	2.68709	2.36231
WBGene00018303	2.68613	2.65369
WBGene00015193	2.68456	2.91919
WBGene00022440	2.68396	2.0158
WBGene00013495	2.68162	2.02583
WBGene00011918	2.67841	2.31593
WBGene00235363	2.67692	2.69324
WBGene00011394	2.67648	2.2982
WBGene00012731	2.67568	2.0639
WBGene00015634	2.67369	1.99238
WBGene00019912	2.67238	2.2063
WBGene00195226	2.67188	4.93381
WBGene00045247	2.66957	1.50352
WBGene00013318	2.66322	1.98894
WBGene00008801	2.6628	1.86143
WBGene00017501	2.66117	1.59414
WBGene00013304	2.6606	1.37129
WBGene00000636	2.65549	2.93008
WBGene00016362	2.65087	1.14667
WBGene00012172	2.65059	2.73099
WBGene00021641	2.64719	2.60983
WBGene00008185	2.64526	3.47476
WBGene00013175	2.64399	2.03715
WBGene00007763	2.6429	2.31532
WBGene00007999	2.64236	2.28609
WBGene00010915	2.63688	3.28726
WBGene00017554	2.63631	2.65129
WBGene00016382	2.63471	2.70504
WBGene00013053	2.62795	1.72476
WBGene00044512	2.6275	1.68087
WBGene00021472	2.62746	2.58885
WBGene00009310	2.62069	1.86535
WBGene00044447	2.61662	2.11089
WBGene00021110	2.61418	2.64638
WBGene00194691	2.61406	1.74678
WBGene00009471	2.61282	1.81181
WBGene00022634	2.61272	1.96633
WBGene00011683	2.61049	2.31202
WBGene00020862	2.60869	2.17607
WBGene00009195	2.60592	2.3374
WBGene00011008	2.60549	3.39521
WBGene00086567	2.60496	1.45135
WBGene00016596	2.60446	2.86997
WBGene00235364	2.59886	2.35163
WBGene00016761	2.59681	1.6238
WBGene00018097	2.59661	1.63954
WBGene00019257	2.58922	2.02591
WBGene00011617	2.58763	3.19224
WBGene00017413	2.58716	1.0789
WBGene00077569	2.58535	2.46269
WBGene00020567	2.57641	1.54749
WBGene00006039	2.57575	1.48109
WBGene00009884	2.57402	1.98714
WBGene00012120	2.57164	1.92133
WBGene00009513	2.57138	2.36124
WBGene00045355	2.57083	1.95947
WBGene00020117	2.56751	1.87856
WBGene00185097	2.56474	3.75027
WBGene00017246	2.56194	1.66079
WBGene00007688	2.55453	2.24876
WBGene00020372	2.54932	3.42799
WBGene00004173	2.54817	2.93028
WBGene00021265	2.54557	1.73786
WBGene00007715	2.54266	3.44542
WBGene00017015	2.54214	1.43218
WBGene00010692	2.54087	2.22682
WBGene00014663	2.54007	1.83963
WBGene00004966	2.53724	2.80199
WBGene00009388	2.53696	1.6196
WBGene00022670	2.53291	2.77282
WBGene00011072	2.53285	1.12427
WBGene00010226	2.53187	1.64437
WBGene00022505	2.53088	1.64603
WBGene00009097	2.52837	1.96979
WBGene00013105	2.5262	2.12681
WBGene00011724	2.52008	2.18353
WBGene00008153	2.51594	3.29023
WBGene00018980	2.5118	2.37777
WBGene00194839	2.50985	3.20683
WBGene00007888	2.50841	2.13495
WBGene00016951	2.50772	2.28387
WBGene00008030	2.49366	1.48186
WBGene00017573	2.49084	1.59576
WBGene00003536	2.48464	2.44875
WBGene00020778	2.48255	1.01468
WBGene00011929	2.48216	2.00184
WBGene00044062	2.48044	2.36487
WBGene00044159	2.46899	1.55995
WBGene00016898	2.46832	2.20327
WBGene00018878	2.46788	2.34555
WBGene00000743	2.46228	4.15063
WBGene00010865	2.45955	1.36043
WBGene00010147	2.45734	1.55269
WBGene00020265	2.45625	2.91208
WBGene00012778	2.45364	1.21987
WBGene00017265	2.45255	1.53202
WBGene00011900	2.45084	1.71846
WBGene00219375	2.45062	1.91212
WBGene00235114	2.45014	2.28099
WBGene00010745	2.44424	2.06764
WBGene00013947	2.44002	2.10104
WBGene00014085	2.43985	2.15307
WBGene00000746	2.439	2.02351
WBGene00018945	2.43876	2.14466
WBGene00015847	2.43691	1.88371
WBGene00018250	2.43131	2.00684
WBGene00001070	2.4311	1.93253
WBGene00023484	2.43006	1.55634
WBGene00014246	2.42849	1.76261
WBGene00000753	2.42636	2.73866
WBGene00021478	2.42441	3.2483
WBGene00008662	2.42307	3.95206
WBGene00011191	2.42266	2.66973
WBGene00235295	2.42218	2.26914
WBGene00008707	2.42083	1.60269
WBGene00269421	2.41922	1.99579
WBGene00007354	2.4122	2.15235
WBGene00010289	2.41156	2.31368
WBGene00008660	2.4111	2.05004
WBGene00013125	2.41074	2.0015
WBGene00015093	2.41033	2.25502
WBGene00008201	2.40785	1.79669
WBGene00022679	2.40748	2.91317
WBGene00016765	2.39949	1.87944
WBGene00003551	2.39946	2.08877
WBGene00008298	2.3977	2.22131
WBGene00007986	2.39612	2.64012
WBGene00010650	2.3948	3.19699
WBGene00020033	2.39204	3.0879
WBGene00020370	2.389	2.05486
WBGene00015500	2.38096	2.45614
WBGene00010323	2.38013	1.80341
WBGene00000016	2.37626	1.70518
WBGene00017218	2.37581	2.52918
WBGene00000749	2.37578	1.99718
WBGene00016429	2.37175	1.38171
WBGene00022700	2.37085	1.67968
WBGene00010526	2.36931	1.421
WBGene00009859	2.36823	1.73134
WBGene00013120	2.36819	1.62817
WBGene00008231	2.36519	1.57163
WBGene00010946	2.36386	1.6231
WBGene00010531	2.35871	1.95986
WBGene00022102	2.35636	1.81822
WBGene00044998	2.35546	2.1442
WBGene00008202	2.35404	1.60273
WBGene00020067	2.35304	1.89805
WBGene00235280	2.35267	1.9138
WBGene00017322	2.35225	1.36235
WBGene00008529	2.35014	2.00806
WBGene00000023	2.34978	1.3596
WBGene00009982	2.3476	2.27365
WBGene00001783	2.34582	1.56216
WBGene00018732	2.34333	2.02795
WBGene00009749	2.34283	2.44279
WBGene00015236	2.34197	2.78556
WBGene00005644	2.33814	1.20404
WBGene00000017	2.33575	1.78012
WBGene00045382	2.32969	1.57149
WBGene00009549	2.32878	1.99454
WBGene00018098	2.32823	2.47696
WBGene00022508	2.32731	1.18839
WBGene00235293	2.32628	3.46153
WBGene00011284	2.32408	2.42494
WBGene00021532	2.32393	1.12334
WBGene00219374	2.32162	1.67803
WBGene00011289	2.32108	1.1856
WBGene00009893	2.31856	3.49257
WBGene00012947	2.31776	1.4334
WBGene00022228	2.31662	1.99271
WBGene00010885	2.31648	1.79718
WBGene00016459	2.3135	2.0368
WBGene00012039	2.31089	2.40517
WBGene00002114	2.3104	1.61589
WBGene00010712	2.30765	2.08585
WBGene00010563	2.30419	2.11874
WBGene00219234	2.30117	3.27175
WBGene00018745	2.30026	2.26569
WBGene00016212	2.29701	1.71296
WBGene00012786	2.29594	2.39725
WBGene00022445	2.29516	2.25614
WBGene00011556	2.29493	1.28559
WBGene00012728	2.29478	2.10789
WBGene00235365	2.29281	1.69628
WBGene00194801	2.29136	1.76605
WBGene00008477	2.29025	1.88142
WBGene00235368	2.28788	1.67763
WBGene00015345	2.28665	2.14332
WBGene00011070	2.28386	2.47277
WBGene00015544	2.28056	2.16301
WBGene00009043	2.28046	2.47742
WBGene00022013	2.27926	1.93434
WBGene00020019	2.2772	2.71957
WBGene00002120	2.27372	2.3736
WBGene00044449	2.26815	1.7282
WBGene00017791	2.26712	1.33616
WBGene00000603	2.26554	2.00286
WBGene00008175	2.26362	1.4534
WBGene00010513	2.26283	1.08429
WBGene00021268	2.26147	1.59672
WBGene00021214	2.26114	1.65375
WBGene00269379	2.25983	2.72322
WBGene00020377	2.25959	1.09199
WBGene00012721	2.25901	2.95162
WBGene00009160	2.25084	2.33903
WBGene00020945	2.25071	1.33152
WBGene00013586	2.24584	3.14822
WBGene00018783	2.24582	1.51766
WBGene00004352	2.24581	1.1245
WBGene00017647	2.24167	1.91071
WBGene00017444	2.23913	1.62838
WBGene00010332	2.2389	1.42521
WBGene00015857	2.23764	1.90287
WBGene00010181	2.23513	2.54275
WBGene00010906	2.23391	2.63411
WBGene00194933	2.23201	2.22397
WBGene00001456	2.23193	1.34409
WBGene00017227	2.22772	2.02074
WBGene00044222	2.2256	1.5326
WBGene00013933	2.22151	1.43317
WBGene00194714	2.22046	1.96826
WBGene00012500	2.21918	1.71512
WBGene00007604	2.21914	1.09861
WBGene00017183	2.21845	1.61051
WBGene00009457	2.21735	1.89599
WBGene00044763	2.21653	2.20997
WBGene00016800	2.21338	1.85564
WBGene00019605	2.21064	1.98029
WBGene00003549	2.21025	2.07044
WBGene00045177	2.20727	1.29768
WBGene00015982	2.2039	2.6634
WBGene00010940	2.19558	1.46755
WBGene00015860	2.19292	1.94132
WBGene00017106	2.19195	2.01779
WBGene00012924	2.19035	1.6826
WBGene00015655	2.18894	1.63877
WBGene00018049	2.18796	2.00451
WBGene00015805	2.18526	1.87487
WBGene00017032	2.18352	2.37214
WBGene00235300	2.18205	1.58535
WBGene00011685	2.17601	2.21716
WBGene00022383	2.17442	1.9737
WBGene00044520	2.1743	1.68252
WBGene00015605	2.16871	2.0868
WBGene00021633	2.16769	1.82254
WBGene00011493	2.16671	1.73854
WBGene00015710	2.16602	1.38052
WBGene00044377	2.16473	1.82857
WBGene00003057	2.16359	1.92177
WBGene00017433	2.16257	1.53649
WBGene00009746	2.16169	1.5575
WBGene00017060	2.15715	1.09709
WBGene00013142	2.15421	2.48497
WBGene00015756	2.15344	1.13722
WBGene00017407	2.15145	1.30194
WBGene00022892	2.15097	1.35852
WBGene00017247	2.14955	1.65372
WBGene00016283	2.14938	1.00686
WBGene00006644	2.14727	2.35795
WBGene00016485	2.147	1.019
WBGene00004154	2.14558	1.5549
WBGene00007590	2.14227	1.48099
WBGene00044260	2.14169	1.91687
WBGene00013121	2.14148	3.09352
WBGene00009383	2.13893	2.13435
WBGene00000704	2.13775	2.89399
WBGene00008634	2.13698	2.19063
WBGene00000799	2.13649	1.58001
WBGene00009324	2.13586	2.41506
WBGene00009846	2.13542	1.40789
WBGene00045242	2.13336	1.77256
WBGene00013799	2.13297	1.22953
WBGene00017139	2.13123	1.3066
WBGene00018047	2.1306	1.64979
WBGene00020289	2.13017	2.49487
WBGene00044005	2.1277	2.20268
WBGene00044366	2.12734	1.66535
WBGene00044392	2.12696	2.4658
WBGene00002348	2.12252	1.48023
WBGene00012296	2.12212	1.95408
WBGene00013928	2.12174	1.32907
WBGene00020995	2.12136	1.74843
WBGene00019689	2.12083	1.46978
WBGene00009384	2.12029	2.14696
WBGene00000741	2.11967	2.39518
WBGene00015759	2.11242	1.34342
WBGene00009857	2.10775	1.32449
WBGene00008907	2.10362	3.16004
WBGene00009129	2.10267	2.28319
WBGene00000627	2.10033	1.38423
WBGene00013609	2.09804	1.4865
WBGene00016781	2.09729	2.07981
WBGene00044174	2.09706	2.74008
WBGene00013190	2.09516	1.86278
WBGene00009154	2.09342	1.47706
WBGene00018025	2.09282	1.87216
WBGene00016534	2.09023	1.00107
WBGene00014225	2.08786	2.93766
WBGene00020413	2.08412	1.44621
WBGene00015089	2.08032	2.36914
WBGene00016667	2.07891	2.45815
WBGene00013637	2.07415	1.64056
WBGene00000615	2.07388	2.33345
WBGene00005058	2.07229	1.46838
WBGene00012925	2.0719	2.63248
WBGene00044702	2.07136	1.27477
WBGene00009962	2.07098	2.21879
WBGene00010314	2.06961	1.38232
WBGene00001451	2.05653	1.12304
WBGene00010886	2.05051	1.32744
WBGene00022282	2.05034	1.88955
WBGene00019335	2.04962	1.06618
WBGene00119204	2.046	2.02968
WBGene00015511	2.04503	1.34596
WBGene00021730	2.04479	1.07106
WBGene00013076	2.04152	1.63382
WBGene00019772	2.03993	2.03333
WBGene00022886	2.03569	1.52888
WBGene00000641	2.03439	3.39691
WBGene00021585	2.03196	1.36224
WBGene00018048	2.02647	1.48941
WBGene00018706	2.02443	2.69976
WBGene00017556	2.02332	1.58096
WBGene00009897	2.01998	1.18251
WBGene00017648	2.01248	1.18517
WBGene00018773	2.01138	2.2681
WBGene00009577	2.01041	1.06344
WBGene00021797	2.0036	1.56231
WBGene00010082	2.00308	1.87891
WBGene00011425	2.00285	1.26827
WBGene00006979	2.0027	1.11718
WBGene00008423	2.00027	1.42591
WBGene00010485	1.99598	2.12953
WBGene00044450	1.99284	1.4461
WBGene00077696	1.99007	1.95226
WBGene00008761	1.98995	1.62785
WBGene00020747	1.98988	1.8333
WBGene00019232	1.98962	1.38805
WBGene00018196	1.98764	1.67934
WBGene00008794	1.98263	1.82627
WBGene00004119	1.9786	1.67385
WBGene00017707	1.97682	1.75386
WBGene00010092	1.97519	2.44317
WBGene00000819	1.9747	1.85762
WBGene00007771	1.97444	1.40806
WBGene00012492	1.97419	1.01307
WBGene00019684	1.97314	1.19248
WBGene00013152	1.97205	2.6302
WBGene00005061	1.97195	2.0842
WBGene00008584	1.97058	1.44883
WBGene00044249	1.96831	3.0571
WBGene00011241	1.96657	2.06648
WBGene00185006	1.96345	2.59286
WBGene00011342	1.9629	1.01346
WBGene00019586	1.9609	1.77599
WBGene00013979	1.95924	2.05635
WBGene00022813	1.95916	1.03918
WBGene00016179	1.95453	1.44194
WBGene00021010	1.95361	1.31633
WBGene00017567	1.95323	2.93455
WBGene00008620	1.95205	1.31444
WBGene00011438	1.94681	1.79022
WBGene00013299	1.94307	1.39724
WBGene00019150	1.94279	2.43325
WBGene00003514	1.93984	1.0709
WBGene00007138	1.9385	2.437
WBGene00009628	1.93664	1.69697
WBGene00013927	1.93508	1.56396
WBGene00044554	1.93469	2.3271
WBGene00014229	1.93288	1.74267
WBGene00008871	1.9327	1.8305
WBGene00006629	1.93171	1.38808
WBGene00019856	1.9299	2.01655
WBGene00020116	1.92965	1.90677
WBGene00000634	1.92502	1.50843
WBGene00044030	1.92296	2.18779
WBGene00009005	1.91727	1.94024
WBGene00013158	1.91651	2.0463
WBGene00045275	1.91244	3.33529
WBGene00138715	1.90867	1.60437
WBGene00007817	1.90848	2.05871
WBGene00005904	1.90749	2.84908
WBGene00020635	1.90371	1.94862
WBGene00015197	1.9027	1.3323
WBGene00019917	1.90267	1.10222
WBGene00010953	1.90251	1.54007
WBGene00018616	1.90005	2.06689
WBGene00016677	1.89867	1.54237
WBGene00012138	1.89815	1.11483
WBGene00015004	1.89617	2.41285
WBGene00189937	1.89586	1.32264
WBGene00021142	1.89166	1.37874
WBGene00013104	1.88844	1.18958
WBGene00002101	1.87617	1.3337
WBGene00000620	1.8731	2.07007
WBGene00015058	1.87181	1.67704
WBGene00001246	1.86793	2.70943
WBGene00017354	1.86702	1.5877
WBGene00010155	1.86308	1.43387
WBGene00004165	1.86141	1.32369
WBGene00001414	1.85778	1.26039
WBGene00021382	1.85538	1.15084
WBGene00011373	1.85114	1.38114
WBGene00014006	1.84593	2.25891
WBGene00020388	1.84271	2.10149
WBGene00007563	1.83174	1.71456
WBGene00044261	1.83053	1.78929
WBGene00194855	1.83025	1.56856
WBGene00044389	1.82879	1.43025
WBGene00013165	1.82353	2.63075
WBGene00044536	1.82165	1.08279
WBGene00009096	1.82128	1.84598
WBGene00018393	1.82066	1.39009
WBGene00015558	1.82009	1.68299
WBGene00018127	1.81827	1.94856
WBGene00000287	1.81706	2.19689
WBGene00010575	1.81665	1.1786
WBGene00000544	1.81658	1.55107
WBGene00000232	1.81643	1.94959
WBGene00050881	1.81579	2.39063
WBGene00017068	1.81562	3.62755
WBGene00219725	1.81223	3.72377
WBGene00012301	1.80802	1.06713
WBGene00022416	1.80752	1.26423
WBGene00018605	1.80519	1.14629
WBGene00016086	1.80469	1.40181
WBGene00000745	1.8042	2.39198
WBGene00018822	1.79908	1.46411
WBGene00013074	1.79601	1.31185
WBGene00044192	1.7907	1.62952
WBGene00004023	1.79061	1.09339
WBGene00020918	1.78915	1.44493
WBGene00009468	1.78601	1.36076
WBGene00007639	1.78248	2.55501
WBGene00013409	1.77809	2.26405
WBGene00017660	1.77653	1.05557
WBGene00007841	1.77628	1.06655
WBGene00020966	1.77449	1.08138
WBGene00009751	1.77416	1.63566
WBGene00009216	1.77362	1.59056
WBGene00012648	1.77284	1.52783
WBGene00009487	1.76883	1.71127
WBGene00009171	1.76827	1.43086
WBGene00015097	1.76388	1.59307
WBGene00044205	1.76338	1.83989
WBGene00005652	1.75333	2.2608
WBGene00012965	1.75194	1.53799
WBGene00012664	1.74922	1.74917
WBGene00011277	1.74879	1.53573
WBGene00016474	1.74543	1.57448
WBGene00044697	1.74448	1.45601
WBGene00007384	1.74105	1.31668
WBGene00044547	1.73965	1.82749
WBGene00010000	1.73456	1.00109
WBGene00020954	1.73325	1.36684
WBGene00004122	1.73268	1.28596
WBGene00017788	1.73243	1.07203
WBGene00015788	1.72533	1.58047
WBGene00018378	1.72328	1.67881
WBGene00009056	1.72246	1.33039
WBGene00021016	1.72059	1.61376
WBGene00013568	1.71993	1.24446
WBGene00012307	1.71421	1.19865
WBGene00008027	1.71267	1.84174
WBGene00015865	1.71135	1.21252
WBGene00008651	1.71032	2.00232
WBGene00009705	1.69894	1.40711
WBGene00007117	1.6978	1.76622
WBGene00008598	1.69706	1.15437
WBGene00009115	1.69295	1.7805
WBGene00000878	1.69063	1.27742
WBGene00016259	1.68916	1.98732
WBGene00008304	1.68697	1.65993
WBGene00012115	1.68602	1.37927
WBGene00018324	1.68516	1.45613
WBGene00022298	1.67915	1.73859
WBGene00002212	1.67333	1.20628
WBGene00022815	1.67187	1.71306
WBGene00021471	1.67173	1.67227
WBGene00013033	1.67089	2.43349
WBGene00009748	1.67014	1.87866
WBGene00001068	1.66992	2.13252
WBGene00020887	1.66903	1.55371
WBGene00018297	1.66718	2.75385
WBGene00022650	1.66481	1.48378
WBGene00015765	1.66451	1.66176
WBGene00009572	1.66361	2.12682
WBGene00044683	1.66327	1.43948
WBGene00022761	1.65632	1.68384
WBGene00019512	1.64554	1.68992
WBGene00006583	1.64124	1.67574
WBGene00007489	1.63855	1.86759
WBGene00007649	1.6377	1.08054
WBGene00008891	1.63688	1.24788
WBGene00019506	1.63477	1.43328
WBGene00011103	1.63319	1.31082
WBGene00011919	1.63245	1.33627
WBGene00015593	1.63217	1.40131
WBGene00021740	1.6315	1.42639
WBGene00000003	1.62935	1.89197
WBGene00043952	1.62588	1.94267
WBGene00021583	1.62583	1.86519
WBGene00013853	1.62187	1.57151
WBGene00011019	1.6212	1.47388
WBGene00044180	1.61916	1.35885
WBGene00009238	1.61513	1.31517
WBGene00013055	1.61278	1.49531
WBGene00012432	1.61076	1.03473
WBGene00022834	1.59879	1.78909
WBGene00013303	1.59462	1.25806
WBGene00011741	1.58929	1.00197
WBGene00016461	1.58811	2.02919
WBGene00008825	1.58586	1.05
WBGene00009916	1.58584	1.57804
WBGene00018207	1.58189	1.21492
WBGene00014082	1.57961	2.29178
WBGene00010750	1.578	1.09506
WBGene00021358	1.57769	1.96326
WBGene00009075	1.57266	2.04386
WBGene00008537	1.5724	1.08903
WBGene00016246	1.57204	1.09065
WBGene00003554	1.56885	1.61832
WBGene00010228	1.56418	1.09443
WBGene00012720	1.54688	1.55303
WBGene00022140	1.54238	1.17364
WBGene00000262	1.53546	1.00107
WBGene00185117	1.53513	1.60438
WBGene00015856	1.53481	2.25902
WBGene00015247	1.53253	1.33926
WBGene00017499	1.52803	1.06662
WBGene00016083	1.51856	1.24859
WBGene00018318	1.51767	1.10085
WBGene00016684	1.51699	1.13002
WBGene00000019	1.51513	1.25694
WBGene00020730	1.5112	1.53015
WBGene00017418	1.51062	1.33037
WBGene00021678	1.50944	1.91559
WBGene00014223	1.50008	1.50341
WBGene00008460	1.49156	1.42328
WBGene00017026	1.47806	1.38992
WBGene00016273	1.4727	2.15559
WBGene00021853	1.47158	1.14447
WBGene00019812	1.46919	1.78462
WBGene00021335	1.46736	2.12846
WBGene00044529	1.46579	1.26496
WBGene00044312	1.46515	1.78753
WBGene00019858	1.46153	1.84789
WBGene00018946	1.45766	2.25774
WBGene00001463	1.45595	1.00322
WBGene00008994	1.45079	1.76517
WBGene00018068	1.45001	1.34049
WBGene00015845	1.44806	1.84895
WBGene00195072	1.44789	2.24325
WBGene00012605	1.44685	1.05023
WBGene00016181	1.44507	1.10944
WBGene00016320	1.44161	1.61649
WBGene00003742	1.43949	1.2005
WBGene00022860	1.43574	1.21788
WBGene00019819	1.43427	1.21604
WBGene00012482	1.43422	1.47332
WBGene00009518	1.43307	1.25726
WBGene00021117	1.42839	1.3662
WBGene00013556	1.42673	1.17169
WBGene00009386	1.42632	1.74461
WBGene00043998	1.4232	1.33149
WBGene00004006	1.42317	1.3403
WBGene00045276	1.42062	2.32496
WBGene00003562	1.40922	1.3905
WBGene00018789	1.40353	1.5206
WBGene00020003	1.40005	1.43388
WBGene00015076	1.38964	1.35435
WBGene00019064	1.38913	1.05594
WBGene00044433	1.38716	1.52336
WBGene00007903	1.38383	2.07089
WBGene00012387	1.38266	1.45423
WBGene00020898	1.37934	1.64985
WBGene00021645	1.37451	1.30336
WBGene00010472	1.37187	1.0947
WBGene00022108	1.36274	1.24672
WBGene00007376	1.36047	1.32243
WBGene00016010	1.35946	1.9011
WBGene00000008	1.35898	1.133
WBGene00019289	1.35642	1.38661
WBGene00019105	1.35617	1.37897
WBGene00018851	1.35204	1.39232
WBGene00044445	1.34966	1.26722
WBGene00020904	1.34907	1.90465
WBGene00006586	1.34009	1.12937
WBGene00013590	1.33808	1.42046
WBGene00000731	1.33584	1.45227
WBGene00013930	1.33553	1.53778
WBGene00014516	1.33395	1.08607
WBGene00016363	1.3338	1.4688
WBGene00017824	1.33307	1.24823
WBGene00010920	1.33286	1.47449
WBGene00017737	1.31686	1.09091
WBGene00022032	1.31621	1.77057
WBGene00009493	1.30684	2.43699
WBGene00011320	1.30255	1.09201
WBGene00009237	1.29651	1.01395
WBGene00011112	1.2937	1.83026
WBGene00003511	1.29082	1.67379
WBGene00011951	1.28922	1.51711
WBGene00019316	1.28603	1.33742
WBGene00009146	1.28479	1.12992
WBGene00011689	1.28403	1.00865
WBGene00015244	1.28221	2.10421
WBGene00004972	1.27147	1.48488
WBGene00012345	1.25129	1.53404
WBGene00021639	1.24921	1.49984
WBGene00022155	1.24229	1.30377
WBGene00000740	1.24224	2.33337
WBGene00006952	1.24038	2.33867
WBGene00011869	1.23586	1.6878
WBGene00021235	1.23028	2.04349
WBGene00013602	1.22913	2.07702
WBGene00015676	1.22373	1.26363
WBGene00017784	1.21621	1.26187
WBGene00008628	1.21302	1.41726
WBGene00009629	1.2103	1.19725
WBGene00013644	1.21023	1.18395
WBGene00003569	1.20488	1.14792
WBGene00008759	1.19143	2.0168
WBGene00006441	1.19088	1.15633
WBGene00017475	1.1896	1.12559
WBGene00044687	1.17454	2.39926
WBGene00195070	1.17012	1.0462
WBGene00004000	1.16503	1.78101
WBGene00016659	1.15567	1.12943
WBGene00018360	1.14881	2.22114
WBGene00001699	1.14842	1.69221
WBGene00022589	1.14216	1.6775
WBGene00008079	1.13915	1.01139
WBGene00004773	1.13828	1.02513
WBGene00017673	1.13365	2.31582
WBGene00017841	1.13144	1.99054
WBGene00007278	1.13136	1.14788
WBGene00011498	1.11476	1.0435
WBGene00045036	1.11411	2.16237
WBGene00021503	1.10673	1.04241
WBGene00017264	1.10333	1.92321
WBGene00004114	1.09753	1.21335
WBGene00020040	1.09044	2.36546
WBGene00013107	1.08069	1.4162
WBGene00020283	1.079	1.229
WBGene00001730	1.06655	2.17013
WBGene00022288	1.0512	1.1798
WBGene00017416	1.04739	1.2031
WBGene00007060	1.03834	1.24921
WBGene00017658	1.03519	1.08182
WBGene00016698	1.02688	1.61374
WBGene00013567	1.02359	1.05617
WBGene00013535	1.01283	1.34326
WBGene00015692	1.01006	1.04644
WBGene00004958	1.00772	1.52613
WBGene00007605	1.00618	1.4637
WBGene00020583	1.00581	1.10323

## Sheet: simr-1 25C gen7 down
Supplementary File 5, Sheet 8: mRNAs significantly down-regulated 2 fold or greater in simr-1 mutant animals at 25ºC for seven generations.
Gene name	log2FoldChange (relative to wt gen1)	log2FoldChange (relative to wt gen7)
WBGene00010461	-7.2892	-3.65333
WBGene00007682	-7.26219	-2.30964
WBGene00013900	-7.22654	-2.09937
WBGene00044772	-7.0096	-2.992
WBGene00044719	-6.47339	-1.70086
WBGene00020326	-6.34587	-1.67743
WBGene00010790	-6.30553	-1.54053
WBGene00010062	-6.24935	-1.39958
WBGene00014067	-6.23693	-2.74036
WBGene00015599	-5.81365	-2.01069
WBGene00011508	-5.80923	-2.62353
WBGene00044379	-5.79434	-2.47553
WBGene00010285	-5.74062	-3.19023
WBGene00007758	-5.73005	-1.82513
WBGene00009041	-5.65381	-2.73888
WBGene00011596	-5.64511	-1.36967
WBGene00016923	-5.6429	-1.48614
WBGene00019699	-5.58074	-2.33723
WBGene00000738	-5.53347	-3.64597
WBGene00009526	-5.4165	-2.0315
WBGene00044024	-5.35771	-2.47278
WBGene00000650	-5.30007	-2.99186
WBGene00011672	-5.00304	-2.4298
WBGene00012540	-4.95817	-2.23761
WBGene00011957	-4.94175	-1.27317
WBGene00017307	-4.93248	-2.63052
WBGene00009261	-4.92292	-1.89972
WBGene00003473	-4.63046	-1.25362
WBGene00007560	-4.62443	-1.9335
WBGene00014698	-4.52232	-2.76527
WBGene00017421	-4.28121	-1.83236
WBGene00012673	-4.2795	-4.48082
WBGene00019839	-4.21194	-2.40643
WBGene00016568	-4.20112	-1.06474
WBGene00002015	-4.17662	-1.7511
WBGene00018568	-4.15919	-1.3655
WBGene00019732	-4.08765	-1.10922
WBGene00016247	-3.94245	-1.42493
WBGene00004174	-3.91426	-2.37901
WBGene00009213	-3.90007	-1.20526
WBGene00000893	-3.88421	-3.13284
WBGene00019154	-3.85184	-1.88529
WBGene00022083	-3.80457	-1.9461
WBGene00008851	-3.80084	-2.25543
WBGene00020613	-3.79968	-1.46512
WBGene00044807	-3.77751	-1.09694
WBGene00012878	-3.77727	-1.12512
WBGene00007365	-3.74742	-1.47188
WBGene00000009	-3.7364	-1.56563
WBGene00022096	-3.6835	-1.58413
WBGene00007459	-3.66412	-1.27991
WBGene00020976	-3.64968	-1.6826
WBGene00008392	-3.6072	-1.02105
WBGene00002019	-3.58282	-1.131
WBGene00002020	-3.58282	-1.131
WBGene00017539	-3.51415	-1.02448
WBGene00008357	-3.42193	-1.17269
WBGene00019921	-3.38187	-2.46502
WBGene00202501	-3.31853	-1.37782
WBGene00021002	-3.31169	-1.38525
WBGene00019662	-3.3057	-1.87142
WBGene00077490	-3.29549	-1.26244
WBGene00009724	-3.29478	-1.62745
WBGene00001055	-3.2869	-1.39053
WBGene00003968	-3.26345	-1.23428
WBGene00006948	-3.21201	-1.79174
WBGene00006947	-3.14218	-1.09554
WBGene00008621	-3.09743	-2.37514
WBGene00016953	-3.06389	-2.81849
WBGene00001564	-3.02251	-1.15066
WBGene00021079	-3.02125	-1.12092
WBGene00016805	-3.01953	-1.21702
WBGene00001119	-3.00058	-3.61639
WBGene00008359	-2.95054	-1.3217
WBGene00005003	-2.94281	-1.17331
WBGene00020626	-2.90816	-1.27863
WBGene00019868	-2.89884	-1.97732
WBGene00001075	-2.86239	-2.20275
WBGene00019436	-2.85185	-1.04775
WBGene00020554	-2.83455	-1.32744
WBGene00007398	-2.82031	-1.08126
WBGene00022165	-2.81485	-1.64728
WBGene00008358	-2.8083	-1.13072
WBGene00000695	-2.77478	-2.19498
WBGene00008360	-2.76453	-1.06262
WBGene00010768	-2.66754	-2.41155
WBGene00000785	-2.65321	-1.00182
WBGene00021263	-2.60265	-1.10997
WBGene00001858	-2.59029	-1.41967
WBGene00018772	-2.47299	-2.07705
WBGene00017153	-2.46361	-2.43194
WBGene00077558	-2.45832	-1.98976
WBGene00021025	-2.3933	-1.5442
WBGene00017484	-2.37767	-1.124
WBGene00011175	-2.35163	-1.67086
WBGene00000463	-2.35036	-1.33701
WBGene00021986	-2.3402	-2.85272
WBGene00016866	-2.31919	-1.19072
WBGene00008102	-2.31189	-2.10143
WBGene00000556	-2.30578	-1.91553
WBGene00001108	-2.27103	-1.78711
WBGene00015613	-2.25368	-1.2466
WBGene00189956	-2.24819	-1.1102
WBGene00044901	-2.19503	-1.42103
WBGene00015781	-2.18234	-1.4941
WBGene00021525	-2.17693	-2.15699
WBGene00010184	-2.17587	-1.03417
WBGene00001069	-2.13441	-2.29024
WBGene00010209	-2.10315	-1.12516
WBGene00015178	-2.08736	-1.19871
WBGene00019094	-2.07705	-1.18676
WBGene00189952	-2.06944	-1.14353
WBGene00008221	-2.04905	-1.18734
WBGene00044799	-2.03547	-1.50422
WBGene00021416	-2.02744	-1.51908
WBGene00012867	-2.01469	-1.86356
WBGene00019514	-2.00027	-1.74686
WBGene00003385	-1.99962	-1.18935
WBGene00004150	-1.98972	-1.12909
WBGene00010005	-1.97964	-1.68633
WBGene00021701	-1.95652	-1.9069
WBGene00000455	-1.94106	-1.12884
WBGene00004052	-1.94047	-1.2299
WBGene00012197	-1.90663	-1.02658
WBGene00014178	-1.87607	-1.2908
WBGene00018215	-1.85213	-1.16821
WBGene00011610	-1.84537	-1.73453
WBGene00001076	-1.83233	-1.75568
WBGene00011383	-1.75659	-1.35597
WBGene00269433	-1.70049	-1.52515
WBGene00000558	-1.70044	-1.71921
WBGene00010295	-1.6902	-1.16295
WBGene00006956	-1.67848	-1.16376
WBGene00012191	-1.66554	-1.05793
WBGene00235353	-1.64827	-1.00506
WBGene00000928	-1.60001	-1.67661
WBGene00015504	-1.59607	-2.89552
WBGene00009877	-1.5786	-1.10878
WBGene00005018	-1.53522	-1.49669
WBGene00022730	-1.51646	-2.13524
WBGene00022020	-1.51229	-1.47375
WBGene00006616	-1.47901	-1.10343
WBGene00013531	-1.47733	-1.26348
WBGene00018547	-1.46846	-1.37557
WBGene00001064	-1.4538	-1.31554
WBGene00011435	-1.37818	-1.29575
WBGene00007375	-1.32103	-1.67019
WBGene00021808	-1.31565	-1.3958
WBGene00020183	-1.29715	-2.02984
WBGene00010573	-1.2143	-1.21349
WBGene00010212	-1.18787	-1.02425
WBGene00009156	-1.17017	-1.69788
WBGene00015403	-1.15018	-1.45469
WBGene00001791	-1.13589	-1.06576
WBGene00021529	-1.07845	-1.59405

## Sheet: simr-1 25C gen7 up
Supplementary File 5, Sheet 9: mRNAs significantly up-regulated 2 fold or greater in simr-1 mutant animals at 25ºC for seven generations.
Gene name	log2FoldChange (relative to wt gen1)	log2FoldChange (relative to wt gen7)
WBGene00007872	8.61565	3.04058
WBGene00018708	7.69605	2.83226
WBGene00021731	7.40991	3.07252
WBGene00016299	6.82253	4.52464
WBGene00004144	6.72005	2.90991
WBGene00016885	6.25549	1.13002
WBGene00020306	6.1139	1.68409
WBGene00008028	6.06281	1.61244
WBGene00018202	5.83815	2.28467
WBGene00017629	5.77725	3.77978
WBGene00017729	5.71495	3.75646
WBGene00009572	5.58278	5.83672
WBGene00020666	5.55675	2.51049
WBGene00011172	5.43823	4.88496
WBGene00019267	5.26507	3.53233
WBGene00007876	5.18383	1.8812
WBGene00015879	5.17542	2.37991
WBGene00015573	5.1744	1.74965
WBGene00016072	5.17145	3.27036
WBGene00008575	4.96427	4.00565
WBGene00044639	4.91345	3.80816
WBGene00017501	4.86765	1.52072
WBGene00022674	4.83124	3.24154
WBGene00007231	4.78381	3.2114
WBGene00014130	4.78092	2.48494
WBGene00010474	4.76576	1.70071
WBGene00206464	4.71525	3.37562
WBGene00019459	4.68565	1.98186
WBGene00019517	4.57382	2.30692
WBGene00018543	4.54172	1.28292
WBGene00014663	4.53519	2.2725
WBGene00044249	4.53251	6.1882
WBGene00018497	4.48535	2.85153
WBGene00009824	4.48162	1.2371
WBGene00016180	4.46004	2.28374
WBGene00018878	4.44792	4.45645
WBGene00015331	4.43006	2.18246
WBGene00011262	4.3697	1.84617
WBGene00016658	4.33642	1.69662
WBGene00017949	4.27855	3.34599
WBGene00000133	4.23587	1.87502
WBGene00044056	4.21539	4.07953
WBGene00219725	4.11513	2.24854
WBGene00044268	4.03307	1.48719
WBGene00007240	4.00991	2.70253
WBGene00008001	4.00653	1.90789
WBGene00011841	3.99875	4.85899
WBGene00007232	3.92152	3.3351
WBGene00009326	3.89882	5.34274
WBGene00017471	3.88652	1.73245
WBGene00000232	3.87101	4.30251
WBGene00020598	3.87025	2.84166
WBGene00019739	3.75981	2.45584
WBGene00000707	3.7372	1.26825
WBGene00009706	3.64249	1.2073
WBGene00045202	3.63943	4.42001
WBGene00016346	3.59075	1.32882
WBGene00013152	3.49497	4.77251
WBGene00018851	3.44909	2.84486
WBGene00000734	3.44851	1.63765
WBGene00015890	3.43192	2.01757
WBGene00016951	3.31976	2.39224
WBGene00015230	3.29377	4.06385
WBGene00019540	3.29344	1.52757
WBGene00020961	3.2832	2.78231
WBGene00004054	3.25941	3.46628
WBGene00020054	3.24962	1.04277
WBGene00014239	3.24013	2.07774
WBGene00017069	3.23859	2.24574
WBGene00018496	3.2362	4.96261
WBGene00021627	3.19858	1.71832
WBGene00022705	3.19732	2.30819
WBGene00020669	3.19103	2.48984
WBGene00044436	3.18119	1.2883
WBGene00007771	3.15933	1.00352
WBGene00018648	3.13689	5.00777
WBGene00016595	3.12062	1.32286
WBGene00022163	3.12024	1.76711
WBGene00017246	3.09809	1.07131
WBGene00010682	3.09316	1.73035
WBGene00009104	3.09169	1.47827
WBGene00077603	3.08305	3.461
WBGene00044541	3.0613	4.38225
WBGene00008495	3.06085	1.22001
WBGene00022223	3.03436	3.41064
WBGene00021797	3.02679	2.80026
WBGene00000606	3.02561	1.20078
WBGene00007867	3.02199	1.78233
WBGene00009622	3.0106	1.38897
WBGene00008584	3.00873	1.93542
WBGene00010377	2.99212	1.24528
WBGene00013888	2.99212	1.24528
WBGene00010726	2.98898	1.52414
WBGene00022416	2.95554	1.41017
WBGene00019070	2.91851	4.1054
WBGene00004394	2.90269	1.72311
WBGene00013651	2.90126	2.37935
WBGene00235367	2.89692	5.01733
WBGene00001483	2.89399	1.81713
WBGene00022433	2.89202	3.50542
WBGene00007693	2.88768	1.52975
WBGene00004119	2.87171	1.49497
WBGene00185077	2.87162	1.652
WBGene00019858	2.86395	3.3541
WBGene00015229	2.86149	3.36699
WBGene00009384	2.85501	1.30569
WBGene00016358	2.85419	1.63093
WBGene00016273	2.84896	2.56429
WBGene00000639	2.84438	1.88601
WBGene00007473	2.83272	1.91017
WBGene00019026	2.80983	1.60407
WBGene00022505	2.80632	1.21658
WBGene00018850	2.782	2.76979
WBGene00009413	2.78149	2.39786
WBGene00010612	2.77526	1.48631
WBGene00003574	2.76234	2.36707
WBGene00015236	2.751	2.51388
WBGene00010928	2.7458	1.18884
WBGene00000989	2.74346	2.0081
WBGene00016781	2.73391	1.20366
WBGene00013779	2.7302	1.12268
WBGene00010883	2.72808	1.88796
WBGene00008754	2.71984	1.79221
WBGene00000657	2.71918	1.30602
WBGene00015572	2.6963	1.65234
WBGene00018537	2.67128	2.34545
WBGene00011401	2.63734	1.75326
WBGene00002006	2.63306	1.09153
WBGene00009890	2.62302	1.43111
WBGene00015435	2.62224	1.42932
WBGene00000602	2.60114	1.3888
WBGene00011870	2.57646	1.40744
WBGene00235295	2.57638	2.05687
WBGene00005061	2.56216	1.05578
WBGene00013409	2.56029	3.77057
WBGene00000256	2.55731	1.71263
WBGene00013157	2.55293	2.2099
WBGene00000649	2.54593	2.27737
WBGene00017247	2.54069	1.17318
WBGene00009048	2.5388	1.07851
WBGene00015629	2.52797	1.58884
WBGene00008448	2.52625	1.54191
WBGene00013400	2.50057	1.22233
WBGene00009269	2.48383	1.89533
WBGene00010989	2.48347	1.69161
WBGene00018528	2.48	4.24322
WBGene00001074	2.47728	1.84476
WBGene00013153	2.47623	2.01818
WBGene00020659	2.46778	1.25162
WBGene00010595	2.45896	1.28932
WBGene00011556	2.43649	1.06463
WBGene00009470	2.43547	1.71119
WBGene00007509	2.42872	2.69572
WBGene00003424	2.42278	1.84771
WBGene00004901	2.41992	1.50902
WBGene00050915	2.41643	1.95356
WBGene00006052	2.40998	1.09465
WBGene00014998	2.4025	1.54214
WBGene00001456	2.40156	1.50767
WBGene00020674	2.3991	1.50121
WBGene00018647	2.39741	1.16376
WBGene00002348	2.39717	1.12514
WBGene00008841	2.39516	1.17718
WBGene00011491	2.38812	1.49127
WBGene00018838	2.37531	2.09862
WBGene00012374	2.37294	1.66382
WBGene00002063	2.36242	2.40692
WBGene00018119	2.35626	1.58484
WBGene00000016	2.3427	1.6343
WBGene00007337	2.34243	1.81309
WBGene00010114	2.33483	1.67901
WBGene00016898	2.33352	1.04232
WBGene00003431	2.33203	1.86294
WBGene00022890	2.32576	2.54056
WBGene00009429	2.32408	2.20806
WBGene00020140	2.31657	1.55337
WBGene00018303	2.31378	1.51028
WBGene00017978	2.31356	1.60147
WBGene00016327	2.30744	1.41013
WBGene00016447	2.30148	1.67912
WBGene00013449	2.28964	2.307
WBGene00007308	2.28947	1.56635
WBGene00018359	2.28729	1.31165
WBGene00008010	2.28475	4.30905
WBGene00004904	2.27449	1.3118
WBGene00002227	2.27402	1.82609
WBGene00044272	2.26553	2.04312
WBGene00002204	2.25567	2.23062
WBGene00004173	2.25546	1.39078
WBGene00010472	2.25254	1.03513
WBGene00010124	2.24853	2.15267
WBGene00003442	2.24722	1.91315
WBGene00007306	2.24686	1.78416
WBGene00001066	2.24388	1.19276
WBGene00010547	2.23551	1.38088
WBGene00017032	2.22352	1.65966
WBGene00014006	2.21527	2.07583
WBGene00016398	2.20975	1.51572
WBGene00012727	2.19769	1.94444
WBGene00016523	2.19738	1.44234
WBGene00010067	2.19226	2.45407
WBGene00013999	2.19129	1.99816
WBGene00013887	2.15889	1.56869
WBGene00008554	2.14622	1.1905
WBGene00013854	2.14486	1.66895
WBGene00006509	2.13563	1.47542
WBGene00008230	2.13553	2.17721
WBGene00007156	2.13083	1.88542
WBGene00019991	2.12873	1.85843
WBGene00000262	2.1282	1.0105
WBGene00011046	2.12589	1.27193
WBGene00013771	2.12306	1.56161
WBGene00077670	2.12119	2.17356
WBGene00017059	2.11987	2.06336
WBGene00009682	2.1195	1.3117
WBGene00003514	2.11509	1.10309
WBGene00044471	2.11317	3.1034
WBGene00016843	2.11059	2.10477
WBGene00013474	2.10981	1.49504
WBGene00012294	2.10656	1.17644
WBGene00009383	2.10353	1.7108
WBGene00021993	2.0975	1.60231
WBGene00019090	2.09614	1.14345
WBGene00022849	2.09558	1.23049
WBGene00020611	2.09397	2.22893
WBGene00016161	2.08974	2.00128
WBGene00021948	2.08903	1.9228
WBGene00012012	2.08484	2.15766
WBGene00009079	2.08338	1.72214
WBGene00011683	2.07887	1.10804
WBGene00009247	2.07123	3.31848
WBGene00020715	2.06633	1.42272
WBGene00006051	2.06452	1.1961
WBGene00003434	2.06406	1.53932
WBGene00007274	2.06355	1.65376
WBGene00021787	2.0627	1.57905
WBGene00001067	2.05961	2.23289
WBGene00010634	2.05838	1.91003
WBGene00019920	2.04901	1.89517
WBGene00000638	2.04538	1.1908
WBGene00019772	2.04297	1.31366
WBGene00006048	2.03801	1.53373
WBGene00014902	2.03759	2.89513
WBGene00015051	2.03291	1.17661
WBGene00003435	2.03261	1.63891
WBGene00003432	2.02999	1.71807
WBGene00044122	2.02514	2.48781
WBGene00009602	2.01347	3.33915
WBGene00003438	2.01347	1.59258
WBGene00022079	2.01259	1.7567
WBGene00007507	2.00178	2.19632
WBGene00004084	1.99357	2.45916
WBGene00016752	1.99345	1.96494
WBGene00014240	1.99179	2.00589
WBGene00001603	1.98693	1.53538
WBGene00021720	1.98543	2.42357
WBGene00012547	1.97991	2.49903
WBGene00012207	1.97973	1.71535
WBGene00018563	1.96923	1.42796
WBGene00015917	1.96842	2.09038
WBGene00010900	1.96598	1.4753
WBGene00017542	1.96135	1.32823
WBGene00014665	1.95979	1.83631
WBGene00008838	1.95289	1.39188
WBGene00017325	1.95133	1.69491
WBGene00012627	1.94941	1.79901
WBGene00010574	1.94856	1.53172
WBGene00015627	1.94826	1.61662
WBGene00011394	1.94409	1.42786
WBGene00015908	1.94347	1.77941
WBGene00003446	1.94332	1.70526
WBGene00015024	1.93945	1.81148
WBGene00019024	1.93858	2.20122
WBGene00008681	1.93561	1.66432
WBGene00015348	1.93481	1.92995
WBGene00007987	1.93108	1.51347
WBGene00012638	1.92985	1.35464
WBGene00008298	1.92631	1.24685
WBGene00012947	1.92602	1.93813
WBGene00011244	1.92361	1.26366
WBGene00001638	1.92145	1.11258
WBGene00008383	1.90071	2.10901
WBGene00012040	1.90031	1.29275
WBGene00016782	1.89729	1.3902
WBGene00043990	1.89379	2.5608
WBGene00007079	1.89379	2.5608
WBGene00016541	1.89235	1.44029
WBGene00008027	1.89049	1.53573
WBGene00011466	1.88944	1.76084
WBGene00016680	1.8871	1.44802
WBGene00009344	1.88657	1.53078
WBGene00017185	1.88034	5.1235
WBGene00021106	1.88034	5.1235
WBGene00009938	1.87699	1.83884
WBGene00005012	1.87624	1.44299
WBGene00018918	1.87602	2.55335
WBGene00020990	1.86186	1.53566
WBGene00009581	1.85983	1.47195
WBGene00019069	1.8585	2.44938
WBGene00018895	1.85324	2.1018
WBGene00002186	1.8506	1.58083
WBGene00010241	1.84636	1.77003
WBGene00013858	1.8462	1.75274
WBGene00003457	1.84281	1.56337
WBGene00017386	1.84097	1.54371
WBGene00010254	1.83995	1.33614
WBGene00016462	1.83875	1.26723
WBGene00008590	1.83854	1.27928
WBGene00016414	1.82661	1.54132
WBGene00003957	1.8233	1.19872
WBGene00008235	1.82231	2.084
WBGene00020593	1.81632	1.02324
WBGene00003443	1.80962	1.62903
WBGene00219326	1.80645	1.50625
WBGene00020356	1.80491	1.76669
WBGene00004123	1.80427	1.51633
WBGene00020860	1.78159	1.31708
WBGene00015805	1.7815	1.77893
WBGene00011467	1.7761	1.61394
WBGene00013696	1.77568	1.69764
WBGene00015422	1.77201	2.44892
WBGene00003463	1.77008	1.36399
WBGene00018852	1.76635	1.55983
WBGene00010366	1.7658	1.18025
WBGene00255375	1.76479	1.79497
WBGene00012087	1.76218	1.20298
WBGene00022445	1.76165	1.86728
WBGene00021113	1.75822	1.72509
WBGene00022440	1.75731	1.53558
WBGene00022707	1.75723	1.31744
WBGene00016053	1.75658	1.2882
WBGene00003470	1.75626	2.13933
WBGene00009047	1.74815	1.26728
WBGene00003469	1.74787	1.74105
WBGene00012169	1.74778	1.51162
WBGene00007610	1.74681	1.76719
WBGene00020070	1.74101	2.03462
WBGene00020526	1.74101	1.54633
WBGene00007794	1.73537	1.27072
WBGene00011462	1.73478	1.90843
WBGene00017636	1.73196	1.24285
WBGene00009321	1.72765	1.51861
WBGene00012595	1.72664	1.43722
WBGene00020905	1.72335	1.64948
WBGene00003569	1.72296	1.63608
WBGene00020862	1.71945	1.1042
WBGene00019081	1.71738	2.61873
WBGene00004965	1.71718	1.80699
WBGene00001863	1.71478	1.35242
WBGene00269379	1.71475	1.41523
WBGene00022754	1.70973	1.37558
WBGene00009695	1.70331	2.3131
WBGene00044633	1.70044	2.37516
WBGene00017264	1.69801	1.76529
WBGene00011968	1.6966	1.24749
WBGene00009548	1.69205	1.61893
WBGene00010633	1.6906	1.22226
WBGene00008541	1.68808	1.20102
WBGene00020223	1.68263	1.60765
WBGene00044175	1.68164	1.33291
WBGene00018135	1.67885	1.27477
WBGene00018158	1.67635	2.23776
WBGene00003426	1.67539	1.86219
WBGene00011132	1.67462	2.2692
WBGene00015666	1.67039	1.17361
WBGene00007307	1.66843	1.52273
WBGene00018548	1.66749	1.50902
WBGene00008508	1.66456	1.98824
WBGene00011214	1.6606	1.72044
WBGene00006038	1.6589	1.49822
WBGene00016677	1.65877	1.96262
WBGene00003429	1.65395	1.10248
WBGene00018301	1.65392	1.79049
WBGene00016357	1.65134	1.80857
WBGene00022751	1.65089	1.73512
WBGene00007875	1.64882	1.10568
WBGene00017336	1.64877	1.08319
WBGene00007733	1.64759	1.02259
WBGene00014247	1.64708	1.51025
WBGene00019406	1.64459	1.38876
WBGene00010265	1.64451	1.09896
WBGene00003467	1.63763	1.07107
WBGene00044586	1.6359	2.3272
WBGene00016714	1.63584	1.18765
WBGene00017112	1.63236	1.44472
WBGene00011712	1.62951	2.65216
WBGene00022090	1.62821	1.58513
WBGene00006057	1.62809	1.53755
WBGene00015688	1.62802	1.33344
WBGene00014992	1.62752	1.73743
WBGene00022224	1.6217	2.41785
WBGene00009016	1.62027	1.66409
WBGene00016605	1.6175	2.17418
WBGene00017114	1.61672	1.48855
WBGene00012689	1.61532	1.90547
WBGene00012809	1.61477	1.38113
WBGene00008074	1.61084	2.00956
WBGene00011120	1.60845	1.68913
WBGene00012937	1.60629	1.70549
WBGene00016054	1.60492	1.43173
WBGene00018608	1.59954	1.09938
WBGene00011795	1.59895	1.77534
WBGene00018258	1.59866	1.43425
WBGene00007133	1.59362	1.68806
WBGene00013956	1.59318	1.28989
WBGene00043988	1.5931	2.87093
WBGene00007075	1.5931	2.87093
WBGene00017322	1.59138	1.32876
WBGene00015855	1.59062	1.36456
WBGene00018792	1.58499	2.10615
WBGene00008313	1.58409	2.05859
WBGene00020451	1.58389	2.00119
WBGene00021996	1.5836	1.45712
WBGene00016637	1.58046	2.63833
WBGene00009031	1.57997	1.40383
WBGene00013723	1.57646	1.14054
WBGene00016440	1.57542	1.39961
WBGene00017955	1.57515	1.30316
WBGene00022431	1.5713	1.55097
WBGene00020713	1.57032	1.58765
WBGene00009684	1.56995	1.45831
WBGene00015456	1.56899	2.41991
WBGene00235090	1.56424	4.89487
WBGene00269421	1.56311	1.60775
WBGene00015929	1.56078	1.64678
WBGene00011173	1.56056	1.78945
WBGene00009896	1.5563	1.87465
WBGene00022888	1.55514	1.69581
WBGene00019086	1.55472	1.29158
WBGene00010651	1.55177	1.32563
WBGene00020841	1.54964	1.99295
WBGene00009492	1.54155	1.76495
WBGene00018336	1.53839	1.65609
WBGene00020567	1.53328	1.41333
WBGene00007341	1.52807	1.06414
WBGene00018134	1.51766	1.42866
WBGene00022246	1.51745	1.0737
WBGene00007517	1.51679	1.01507
WBGene00008483	1.51666	1.08636
WBGene00016076	1.51644	1.70589
WBGene00194703	1.51389	1.67754
WBGene00014129	1.51386	2.01213
WBGene00019912	1.51305	2.28032
WBGene00020350	1.50848	1.31415
WBGene00004966	1.49803	1.78816
WBGene00015907	1.49707	2.0039
WBGene00007159	1.49464	1.48401
WBGene00021398	1.49292	1.6199
WBGene00007778	1.48794	1.13865
WBGene00010035	1.48491	1.0357
WBGene00012898	1.48451	1.8388
WBGene00020414	1.48435	1.4391
WBGene00014169	1.48061	1.25896
WBGene00009185	1.48045	1.32472
WBGene00014085	1.48012	1.66755
WBGene00016351	1.47399	1.86242
WBGene00044998	1.47174	2.21899
WBGene00009458	1.47039	1.60569
WBGene00019430	1.46943	1.39803
WBGene00022815	1.46786	1.91139
WBGene00009480	1.46392	1.20114
WBGene00015931	1.45875	1.46699
WBGene00016288	1.45743	1.69105
WBGene00010874	1.45716	2.87142
WBGene00009681	1.45091	1.33004
WBGene00013473	1.44672	1.26482
WBGene00000287	1.44319	1.6908
WBGene00044655	1.44113	1.37003
WBGene00019214	1.4386	1.07907
WBGene00013155	1.43376	2.91346
WBGene00017851	1.4325	1.66729
WBGene00003465	1.43122	1.40869
WBGene00009605	1.42066	1.64311
WBGene00044674	1.41767	1.84682
WBGene00006053	1.41693	1.12919
WBGene00016753	1.41579	1.42828
WBGene00010091	1.41212	1.55137
WBGene00000544	1.41135	1.17408
WBGene00014186	1.40965	1.57595
WBGene00011910	1.40849	1.31422
WBGene00016416	1.40802	1.86689
WBGene00003464	1.40684	1.39362
WBGene00007457	1.40488	1.35162
WBGene00019785	1.40203	1.65492
WBGene00014197	1.39597	1.6872
WBGene00007097	1.39412	1.84228
WBGene00009149	1.39247	2.19279
WBGene00007190	1.38503	1.26205
WBGene00014238	1.37974	1.36509
WBGene00014857	1.37953	1.21502
WBGene00008724	1.3782	1.32415
WBGene00013700	1.37792	1.85216
WBGene00020661	1.37535	1.13425
WBGene00006449	1.36892	1.3118
WBGene00016040	1.36612	1.23557
WBGene00021579	1.36576	1.26542
WBGene00015634	1.36335	1.04845
WBGene00016399	1.35994	1.65449
WBGene00008259	1.35716	1.58501
WBGene00004398	1.35675	1.38874
WBGene00009377	1.34901	1.46325
WBGene00013459	1.34774	1.07451
WBGene00010953	1.346	2.1136
WBGene00021969	1.33765	1.90844
WBGene00077519	1.33711	1.62661
WBGene00043989	1.33285	2.60364
WBGene00007076	1.33285	2.60364
WBGene00010750	1.33059	1.16172
WBGene00011954	1.3261	1.4178
WBGene00007301	1.3242	1.63365
WBGene00009956	1.3174	1.24651
WBGene00018732	1.31317	1.68894
WBGene00016491	1.31282	1.13669
WBGene00010869	1.31193	1.41081
WBGene00007305	1.31109	1.30669
WBGene00009459	1.31068	1.72287
WBGene00001399	1.30793	1.53923
WBGene00006979	1.30406	1.33492
WBGene00017498	1.30317	1.60586
WBGene00010486	1.29873	1.15668
WBGene00013234	1.29576	1.30127
WBGene00021650	1.29025	1.23473
WBGene00021343	1.28828	1.11395
WBGene00014116	1.28816	1.9659
WBGene00008743	1.28781	1.10708
WBGene00016512	1.28418	1.31883
WBGene00011378	1.27695	1.87785
WBGene00006056	1.26942	1.76461
WBGene00043743	1.26903	1.83236
WBGene00016322	1.25247	1.9828
WBGene00010451	1.25175	2.21175
WBGene00014158	1.24988	1.26238
WBGene00003448	1.2459	1.21988
WBGene00013158	1.23774	1.31179
WBGene00008063	1.23172	2.43144
WBGene00007584	1.23157	1.46268
WBGene00009324	1.2286	1.64892
WBGene00011869	1.22664	1.40423
WBGene00000799	1.22641	1.02068
WBGene00022298	1.2142	1.10726
WBGene00023284	1.21409	1.08077
WBGene00011176	1.20474	1.66889
WBGene00020840	1.19694	1.63584
WBGene00009846	1.19641	1.30179
WBGene00018879	1.18691	1.81745
WBGene00022002	1.18335	1.93866
WBGene00012781	1.17903	1.10969
WBGene00020887	1.17616	2.00211
WBGene00020413	1.17496	1.59391
WBGene00019316	1.17089	1.11008
WBGene00015094	1.16799	1.34372
WBGene00009386	1.16536	1.33055
WBGene00008033	1.16152	1.0283
WBGene00017613	1.15144	1.10906
WBGene00018523	1.14916	1.31812
WBGene00021007	1.14799	1.33228
WBGene00013853	1.14787	1.11036
WBGene00015937	1.14379	1.86015
WBGene00007793	1.1406	1.72559
WBGene00009075	1.13794	1.53914
WBGene00017573	1.13506	1.15856
WBGene00004245	1.1349	1.21904
WBGene00001414	1.12484	1.38187
WBGene00001032	1.1246	1.56571
WBGene00015795	1.12393	1.48492
WBGene00012811	1.1157	1.05217
WBGene00017621	1.11391	1.29399
WBGene00022649	1.11172	1.68514
WBGene00007138	1.10882	1.66132
WBGene00044177	1.10398	1.85603
WBGene00012926	1.09704	1.70515
WBGene00016474	1.09618	1.44094
WBGene00017060	1.0916	1.24416
WBGene00009884	1.0874	1.20698
WBGene00000653	1.07968	1.50981
WBGene00010289	1.07858	1.08567
WBGene00014814	1.0737	1.5244
WBGene00016800	1.07219	1.46382
WBGene00013713	1.05735	1.25677
WBGene00011929	1.05226	1.46042
WBGene00007751	1.05197	1.01264
WBGene00014643	1.04799	1.25236
WBGene00013535	1.0383	2.53727
WBGene00044316	1.03067	2.16576
WBGene00014179	1.01754	1.16365
WBGene00006436	1.01659	1.52203
WBGene00014672	1.01596	1.25075
WBGene00011706	1.00246	1.12988
WBGene00019410	1.00035	1.50898

## Sheet: simr-1 25C gen10 down
Supplementary File 5, Sheet 10: mRNAs significantly down-regulated 2 fold or greater in simr-1 mutant animals at 25ºC for 10 generations.
Gene name	log2FoldChange (relative to wt gen1)	log2FoldChange (relative to wt gen10)
WBGene00016017	-7.54088	-2.15735
WBGene00018913	-7.00897	-2.29559
WBGene00010790	-6.67917	-1.71813
WBGene00001477	-6.67602	-1.89446
WBGene00044719	-6.57534	-2.05242
WBGene00009778	-6.05727	-1.79336
WBGene00012070	-5.92758	-2.23255
WBGene00014046	-5.80905	-1.04665
WBGene00007758	-5.80099	-1.10428
WBGene00011677	-5.70192	-2.69554
WBGene00009261	-5.48024	-3.62894
WBGene00011427	-5.31865	-2.81402
WBGene00044242	-5.28524	-1.70085
WBGene00008295	-5.19321	-1.44808
WBGene00002102	-5.18351	-4.77915
WBGene00005228	-5.0705	-2.36575
WBGene00000893	-5.01346	-4.14271
WBGene00007560	-4.9429	-3.12272
WBGene00012540	-4.93703	-2.80915
WBGene00012673	-4.91949	-3.84507
WBGene00020250	-4.91843	-4.79877
WBGene00022577	-4.72385	-3.65205
WBGene00019699	-4.71707	-1.06731
WBGene00010285	-4.58016	-2.59533
WBGene00017018	-4.54574	-4.22881
WBGene00022024	-4.50937	-2.84553
WBGene00007203	-4.49527	-1.21621
WBGene00044024	-4.47363	-1.611
WBGene00011508	-4.37695	-1.04279
WBGene00016923	-4.37182	-1.15687
WBGene00018295	-4.25622	-3.49772
WBGene00007264	-4.25444	-2.83059
WBGene00013761	-4.25419	-4.31537
WBGene00077558	-4.22288	-2.67181
WBGene00019184	-4.17521	-2.47877
WBGene00015599	-4.17195	-1.817
WBGene00044772	-4.13266	-2.18214
WBGene00001119	-4.08496	-3.63336
WBGene00007682	-4.06478	-2.46128
WBGene00000705	-4.03857	-4.59346
WBGene00009355	-4.03493	-2.88977
WBGene00004998	-4.00574	-3.42692
WBGene00044807	-3.91788	-1.24984
WBGene00015993	-3.89693	-1.91221
WBGene00022038	-3.88491	-3.08539
WBGene00012878	-3.79858	-1.42499
WBGene00003473	-3.77695	-1.16203
WBGene00017307	-3.77065	-2.55766
WBGene00011997	-3.76563	-1.77859
WBGene00011596	-3.76051	-1.318
WBGene00022415	-3.68578	-3.54719
WBGene00021491	-3.64512	-1.0918
WBGene00016953	-3.57648	-2.28437
WBGene00019154	-3.56366	-2.5288
WBGene00012448	-3.53638	-1.34654
WBGene00007365	-3.4793	-1.05391
WBGene00007957	-3.42412	-1.42957
WBGene00235268	-3.37796	-2.79559
WBGene00001055	-3.35822	-1.47509
WBGene00023501	-3.32311	-1.88442
WBGene00007883	-3.31633	-1.0928
WBGene00021002	-3.25019	-1.23029
WBGene00020613	-3.22651	-1.36215
WBGene00007459	-3.22341	-1.36835
WBGene00010184	-3.14053	-1.84863
WBGene00000690	-3.09748	-1.1799
WBGene00008597	-3.07729	-1.41378
WBGene00006775	-3.05548	-2.39455
WBGene00018750	-3.05541	-2.3139
WBGene00010768	-3.02423	-1.4943
WBGene00017421	-3.00988	-2.38715
WBGene00000535	-2.97116	-1.26881
WBGene00021703	-2.94822	-1.48321
WBGene00008359	-2.94453	-2.13116
WBGene00001714	-2.91315	-2.30578
WBGene00001716	-2.88894	-3.61188
WBGene00018748	-2.87431	-2.68042
WBGene00001724	-2.8663	-1.49481
WBGene00007210	-2.81856	-2.10309
WBGene00008357	-2.79987	-1.57777
WBGene00006947	-2.7977	-1.81501
WBGene00015340	-2.78308	-1.29243
WBGene00019113	-2.77446	-1.387
WBGene00006980	-2.7429	-1.07474
WBGene00001564	-2.74134	-1.15328
WBGene00006948	-2.73029	-3.15496
WBGene00010223	-2.7263	-1.00502
WBGene00016805	-2.7228	-1.63388
WBGene00019314	-2.72094	-1.90482
WBGene00010835	-2.68598	-1.98815
WBGene00011437	-2.64358	-1.19776
WBGene00019840	-2.63384	-1.94695
WBGene00045208	-2.61582	-2.39325
WBGene00018242	-2.61252	-2.65514
WBGene00019368	-2.58538	-1.22302
WBGene00006665	-2.58322	-2.80382
WBGene00017991	-2.58115	-3.57575
WBGene00019839	-2.57204	-1.57215
WBGene00021389	-2.54566	-1.83424
WBGene00016193	-2.49756	-1.37594
WBGene00011927	-2.49673	-1.1292
WBGene00017340	-2.49586	-1.2115
WBGene00012783	-2.47635	-1.12715
WBGene00045067	-2.47514	-1.74908
WBGene00007288	-2.46231	-1.17105
WBGene00017153	-2.46185	-1.59893
WBGene00017306	-2.45102	-1.57017
WBGene00019623	-2.45055	-2.66427
WBGene00008851	-2.44803	-1.44425
WBGene00008655	-2.44634	-1.58862
WBGene00008360	-2.44591	-1.3869
WBGene00077490	-2.44562	-2.15838
WBGene00008621	-2.4421	-1.27412
WBGene00077444	-2.4177	-2.48798
WBGene00016403	-2.40901	-2.45103
WBGene00189956	-2.39109	-1.02654
WBGene00015339	-2.38299	-2.29471
WBGene00008522	-2.3737	-1.36171
WBGene00016795	-2.36839	-1.83065
WBGene00015781	-2.36621	-2.17378
WBGene00009700	-2.3605	-1.19226
WBGene00044350	-2.35138	-1.04978
WBGene00002016	-2.33511	-1.15863
WBGene00010723	-2.31632	-1.74494
WBGene00018005	-2.30643	-1.94584
WBGene00010267	-2.30536	-2.1816
WBGene00013899	-2.30074	-1.12145
WBGene00017267	-2.30046	-1.14158
WBGene00017270	-2.30046	-1.14158
WBGene00000013	-2.29138	-1.55871
WBGene00007916	-2.28844	-1.91083
WBGene00013891	-2.28341	-1.85531
WBGene00017654	-2.26376	-1.33981
WBGene00044283	-2.25328	-1.10496
WBGene00044623	-2.2527	-2.86089
WBGene00045183	-2.23668	-2.07536
WBGene00013852	-2.23562	-2.64223
WBGene00002018	-2.22065	-1.25628
WBGene00010320	-2.22022	-1.51389
WBGene00017998	-2.1929	-2.39976
WBGene00195209	-2.18632	-1.60658
WBGene00003850	-2.17823	-1.67128
WBGene00021263	-2.16919	-1.16821
WBGene00018297	-2.15738	-1.75303
WBGene00013146	-2.15722	-1.32158
WBGene00001989	-2.14322	-1.932
WBGene00008358	-2.12395	-1.5776
WBGene00017127	-2.1186	-1.09002
WBGene00013585	-2.11181	-1.16715
WBGene00009724	-2.10846	-1.88081
WBGene00017225	-2.10105	-2.22954
WBGene00006611	-2.09241	-1.71857
WBGene00021986	-2.07661	-2.3318
WBGene00021978	-2.06231	-1.66213
WBGene00011643	-2.06121	-1.52113
WBGene00012032	-2.04159	-1.74995
WBGene00003385	-2.0398	-1.07875
WBGene00014055	-2.03803	-1.03991
WBGene00010262	-2.02133	-1.31202
WBGene00007495	-2.01973	-1.58881
WBGene00008462	-2.00833	-1.40084
WBGene00004236	-1.99492	-1.93841
WBGene00016329	-1.98575	-1.94711
WBGene00020976	-1.98499	-1.59645
WBGene00008150	-1.97371	-1.97561
WBGene00019750	-1.93946	-1.48369
WBGene00015476	-1.92641	-1.27519
WBGene00002087	-1.92305	-1.57162
WBGene00010958	-1.92212	-1.64371
WBGene00022283	-1.918	-1.29514
WBGene00006636	-1.9133	-1.15815
WBGene00015178	-1.89695	-2.5537
WBGene00023416	-1.89565	-1.56391
WBGene00007006	-1.89321	-2.18409
WBGene00020125	-1.89093	-2.02046
WBGene00006522	-1.87431	-1.66262
WBGene00017484	-1.85717	-1.4831
WBGene00012867	-1.84996	-1.38664
WBGene00008760	-1.84332	-1.1143
WBGene00018737	-1.84048	-1.90569
WBGene00044779	-1.82363	-1.23622
WBGene00015934	-1.81763	-1.2715
WBGene00016146	-1.81554	-1.73123
WBGene00019520	-1.81037	-2.18999
WBGene00044901	-1.80451	-1.51141
WBGene00017535	-1.79501	-1.83076
WBGene00020554	-1.78192	-1.93941
WBGene00008215	-1.77259	-1.68541
WBGene00022797	-1.75671	-1.25141
WBGene00008858	-1.74288	-1.06404
WBGene00219208	-1.7176	-1.23337
WBGene00017716	-1.71326	-1.50866
WBGene00003029	-1.70444	-1.63624
WBGene00000969	-1.68764	-1.08609
WBGene00007890	-1.68362	-1.63119
WBGene00023486	-1.68003	-1.30389
WBGene00009239	-1.66734	-1.06683
WBGene00044553	-1.66312	-1.06265
WBGene00011530	-1.64409	-1.96915
WBGene00020033	-1.64359	-1.27799
WBGene00019426	-1.63271	-1.89472
WBGene00015231	-1.61652	-1.09012
WBGene00019472	-1.60722	-1.10401
WBGene00001069	-1.60021	-3.05448
WBGene00006538	-1.59377	-1.3811
WBGene00004052	-1.5738	-1.16634
WBGene00000170	-1.55585	-1.04014
WBGene00016468	-1.54125	-1.47635
WBGene00010175	-1.54006	-1.29262
WBGene00015294	-1.53427	-1.45859
WBGene00012255	-1.53333	-2.8342
WBGene00009304	-1.52962	-1.31797
WBGene00008543	-1.52477	-1.41779
WBGene00013516	-1.52372	-1.02916
WBGene00011328	-1.52332	-1.98155
WBGene00000463	-1.5177	-1.4995
WBGene00018215	-1.50146	-1.93308
WBGene00021094	-1.50012	-1.48691
WBGene00017429	-1.49371	-1.35387
WBGene00014053	-1.4917	-1.18922
WBGene00008519	-1.48647	-1.57905
WBGene00077775	-1.48643	-1.39658
WBGene00006983	-1.4823	-1.29353
WBGene00017292	-1.48104	-1.02014
WBGene00017597	-1.48025	-1.40533
WBGene00007112	-1.47664	-1.01797
WBGene00013499	-1.47527	-1.2394
WBGene00016009	-1.47215	-1.06605
WBGene00006852	-1.46896	-1.20578
WBGene00020047	-1.46671	-1.07552
WBGene00022730	-1.46221	-2.08979
WBGene00018787	-1.45061	-1.41698
WBGene00045253	-1.44864	-1.01548
WBGene00017637	-1.4408	-1.14557
WBGene00001064	-1.43746	-2.90033
WBGene00010742	-1.436	-1.56145
WBGene00019597	-1.43526	-1.28924
WBGene00045238	-1.43396	-1.49735
WBGene00019968	-1.43038	-1.44637
WBGene00017838	-1.42272	-1.11832
WBGene00015002	-1.42133	-1.20561
WBGene00011018	-1.42065	-2.14827
WBGene00009100	-1.41342	-1.30257
WBGene00018403	-1.41112	-1.04027
WBGene00008886	-1.40508	-1.51169
WBGene00003031	-1.37823	-1.11672
WBGene00003675	-1.37698	-1.67975
WBGene00007430	-1.36652	-1.10313
WBGene00018261	-1.36567	-1.01804
WBGene00010966	-1.36442	-1.60283
WBGene00000599	-1.35352	-2.35716
WBGene00017938	-1.35329	-1.64185
WBGene00000928	-1.3529	-3.04169
WBGene00011428	-1.34528	-1.22082
WBGene00016071	-1.34341	-1.50875
WBGene00016003	-1.34196	-1.19603
WBGene00012257	-1.33711	-2.91661
WBGene00044035	-1.30682	-1.57327
WBGene00016359	-1.30039	-1.19707
WBGene00015729	-1.29517	-1.44378
WBGene00043994	-1.28663	-1.18803
WBGene00009723	-1.28223	-1.50898
WBGene00017193	-1.27805	-1.45303
WBGene00001791	-1.27275	-1.10062
WBGene00011812	-1.25848	-1.70852
WBGene00012880	-1.25765	-1.03937
WBGene00008233	-1.25755	-1.82728
WBGene00004264	-1.25265	-1.98132
WBGene00015592	-1.25224	-1.30973
WBGene00001242	-1.25095	-1.02151
WBGene00012433	-1.24842	-1.18835
WBGene00002030	-1.2347	-1.24271
WBGene00004359	-1.2209	-1.40847
WBGene00000950	-1.21038	-1.44996
WBGene00007515	-1.20846	-2.15209
WBGene00019655	-1.20591	-1.49454
WBGene00005018	-1.19832	-1.71377
WBGene00019495	-1.19304	-1.81759
WBGene00000739	-1.18926	-1.35322
WBGene00006956	-1.1837	-2.56549
WBGene00000720	-1.16882	-1.9588
WBGene00010931	-1.16828	-1.63846
WBGene00010573	-1.16768	-1.60167
WBGene00013008	-1.16228	-1.90662
WBGene00015504	-1.15792	-1.84955
WBGene00011383	-1.15486	-1.33534
WBGene00016088	-1.15119	-1.62785
WBGene00077593	-1.14917	-1.2348
WBGene00011763	-1.14382	-1.48289
WBGene00004232	-1.13102	-1.86291
WBGene00020566	-1.12108	-1.25159
WBGene00012185	-1.11885	-1.44363
WBGene00007304	-1.09799	-1.04355
WBGene00010957	-1.09486	-1.41305
WBGene00011235	-1.08609	-1.3243
WBGene00003747	-1.08125	-1.02334
WBGene00016914	-1.07596	-1.25472
WBGene00009929	-1.07144	-1.32666
WBGene00000740	-1.0713	-2.53572
WBGene00009349	-1.05956	-1.38853
WBGene00000681	-1.05935	-1.5759
WBGene00007347	-1.05086	-1.01911
WBGene00001432	-1.04117	-1.0327
WBGene00008605	-1.02828	-1.88764
WBGene00001475	-1.0135	-1.54541
WBGene00019300	-1.00614	-1.1324
WBGene00018561	-1.00401	-1.05979

[truncated: 5 more sheets: simr-1 25C gen10 up, mut-16 20C down, mut-16 20C up, simr-1 exclusively gen10 down, simr-1 exclusively gen10 up]
