# Supplementary material for: A tudor domain protein, SIMR-1, promotes siRNA production at piRNA-targeted mRNAs in C. elegans
Source: eLife. 2020 Apr 27;9:e56731. doi: 10.7554/eLife.56731 (PMC7255803; doi:10.7554/eLife.56731)
Supplement: Supplementary file 6. [file elife-56731-supp6.xlsx]

## Sheet: Key resources
Supplementary File 6. Key resources table.
Reagent type (species) or resource	Designation	Source or reference	Identifiers	Additional Information
strain, strain background (C. elegans)	wild-type		N2
strain, strain background (C. elegans)	mut-16::gfp or mut-16::gfp::3xFLAG	Uebel et al, 2018	USC717	mut-16(cmp3[mut-16::gfp::3xFLAG + loxP]) I
strain, strain background (C. elegans)	math-33::mCherry	This paper	USC771	mut-16(cmp3[mut-16::gfp::3xFLAG + loxP]) I; unc-119(ed3) III; math-33(cmp12[math-33::mCherry::2xHA + loxP Cbr-unc-119(+) loxP]) V
strain, strain background (C. elegans)	simr-1::mCherry	This paper	USC774	simr-1(cmp15[simr-1::mCherry::2xHA loxP Cbr-unc-119 loxP]) mut-16(cmp3[mut-16::gfp::3xFLAG + loxP]) I; unc-119(ed3) III
strain, strain background (C. elegans)	C33G3.6::mCherry	This paper	USC777	mut-16(cmp3[mut-16::gfp::3xFLAG + loxP]) I; unc-119(ed3) III; C33G3.6(cmp18[C33G3.6::mCherry::2xHA + loxP Cbr-unc-119(+) loxP]) X
strain, strain background (C. elegans)	F37C4.5::mCherry	This paper	USC779	mut-16(cmp3[mut-16::gfp::3xFLAG + loxP]) I; unc-119(ed3) III; F37C4.5(cmp20[F37C4.5::mCherry::2xHA + loxP Cbr-unc-119(+) loxP]) IV
strain, strain background (C. elegans)	hgo-1::mCherry	This paper	USC781	hgo-1(cmp22[hgo-1::mCherry::2xHA + loxP Cbr-unc-119(+) loxP]) mut-16(cmp3[mut-16::gfp::3xFLAG + loxP]) I; unc-119(ed3) III
strain, strain background (C. elegans)	Y57G11C.3::mCherry	This paper	USC784	mut-16(cmp3[mut-16::gfp::3xFLAG + loxP]) I; unc-119(ed3) III; Y57G11C.3(cmp25[Y57G11C.3::mCherry::2xHA + loxP Cbr-unc-119(+) loxP]) IV
strain, strain background (C. elegans)	hpo-40::mCherry	This paper	USC787	mut-16(cmp3[mut-16::gfp::3xFLAG + loxP]) I; unc-119(ed3) III; hpo-40(cmp28)[hpo-40::mCherry::2xHA + loxP Cbr-unc-119(+) loxP]) V
strain, strain background (C. elegans)	rsd-2::mCherry	This paper	USC898	mut-16(cmp3[mut-16::gfp::3xFLAG + loxP]) I; rsd-2(cmp55[rsd-2::mCherry::2xHA + loxP]) IV
strain, strain background (C. elegans)	simr-1::mCherry; mut-16	This paper	USC818	simr-1(cmp15[simr-1::mCherry::2xHA loxP Cbr-unc-119 loxP]) mut-16 (pk710) I; unc-119(ed3) III
strain, strain background (C. elegans)	simr-1; mut-16::gfp; hpo-40	This paper	USC1018	simr-1(cmp36) mut-16(cmp3[mut-16::gfp::3xFLAG + loxP]) I; hpo-40(cmp46) V
strain, strain background (C. elegans)	wago-1	National Bioresource Project (Japan)	FX01414	wago-1 (tm1414) I (4x outcrossed)
strain, strain background (C. elegans)	rde-8	National Bioresource Project (Japan)	FX02252	rde-8(tm2252) IV (4x outcrossed)
strain, strain background (C. elegans)	hgo-1	National BioResource Project (Japan)	FX18469	hgo-1(tm4989) I (4x outcrossed)
strain, strain background (C. elegans)	mut-16	Caenorhabditis Genetics Center (CGC) and Vastenhouw et al, 2003	NL1810	mut-16(pk710) I (4x outcrossed)
strain, strain background (C. elegans)	rsd-2	Caenorhabditis Genetics Center (CGC)	NL3307	rsd-2(pk3307) IV (4x outcrossed)
strain, strain background (C. elegans)	math-33	Caenorhabditis Genetics Center (CGC)	RB2194	math-33(ok2974) V (3x outcrossed)
strain, strain background (C. elegans)	F37C4.5	Caenorhabditis Genetics Center (CGC)	RB2494	F37C4.5(ok3454) IV (4x outcrossed)
strain, strain background (C. elegans)	C33G3.6	This paper	USC855	C33G3.6(cmp44) X
strain, strain background (C. elegans)	Y57G11C.3	This paper	USC867	Y57G11C.3(cmp47) IV
strain, strain background (C. elegans)	simr-1	This paper	USC863	simr-1(cmp36) I
strain, strain background (C. elegans)	hpo-40	This paper	USC864	hpo-40(cmp46) V
strain, strain background (C. elegans)	simr-1; hpo-40	This paper	USC862	simr-1(cmp36) I; hpo-40(cmp46) V
strain, strain background (C. elegans)	nyn-2; nyn-1	This paper	USC880	nyn-2(tm4844) I; nyn-1(tm5004) IV (4x outcrossed)
strain, strain background (C. elegans)	fog-2	Caenorhabditis Genetics Center (CGC)	BS553	fog-2(oz40) V
strain, strain background (C. elegans)	pgl-1::gfp	Andralojc et al, 2017	DUP75	pgl-1(sam33[pgl-1::gfp::3xFLAG]) IV
strain, strain background (C. elegans)	ced-1::gfp	Caenorhabditis Genetics Center (CGC) and Schumacher et al, 2005	MD701	bcls39(lim-7p::ced-1::GFP; lin-15(+)) V
strain, strain background (C. elegans)	simr-1; ced-1::gfp	This paper	USC1256	simr-1(cmp36) I; bcls39(lim-7p::ced-1::GFP; lin-15(+)) V
strain, strain background (C. elegans)	piRNA sensor; henn-1	de Albuquerque et al, 2014	RFK47	mjIs144[unc-119(+); Pmex-5::GFP::his-58::21UR-1_as::tbb-2 3’UTR] II; henn-1(pk2295) III
strain, strain background (C. elegans)	simr-1[R159C]; piRNA sensor; henn-1	This paper	RFK1224	simr-1(xf19[R159C]) I; mjIs144[unc-119(+); Pmex-5::GFP::his-58::21UR-1_as::tbb-2 3’UTR] II; henn-1(pk2295) III
strain, strain background (C. elegans)	simr-1[A11V]; piRNA sensor; henn-1	This paper	RFK1225	simr-1(xf22[A11V]) I; mjIs144[unc-119(+); Pmex-5::GFP::his-58::21UR-1_as::tbb-2 3’UTR] II; henn-1(pk2295) III
strain, strain background (C. elegans)	piRNA sensor	Bagijn et al, 2012	SX1316	mjIs144[unc-119(+); Pmex-5::GFP::his-58::21UR-1_as::tbb-2 3’UTR] II; unc-119(ed3) III
strain, strain background (C. elegans)	simr-1; piRNA sensor	This paper	USC1345	simr-1(cmp36) I; mjIs144[unc-119(+); Pmex-5::GFP::his-58::21UR-1_as::tbb-2 3’UTR] II; unc-119(ed3) III
strain, strain background (C. elegans)	mut-16; piRNA sensor	This paper	USC1330	mut-16(pk710) I; mjIs144[unc-119(+); Pmex-5::GFP::his-58::21UR-1_as::tbb-2 3’UTR] II; unc-119(ed3) III
strain, strain background (C. elegans)	22G-siR1 sensor	Montgomery et al, 2012	GR1720	unc-119(ed3) III; mgSi4[ubl-1p::GFP::siR-1-sensor-ubl-1-3'UTR Cbr-unc-119(+))] IV
strain, strain background (C. elegans)	simr-1; 22G-siR1 sensor	This paper	USC834	simr-1(cmp36) I ; unc-119(ed3) III ; mgSi4[ubl-1p::GFP::siR-1-sensor-ubl-1-3'UTR Cbr-unc-119(+))] IV
strain, strain background (C. elegans)	mut-16; 22G-siR1 sensor	Phillips et al, 2014	GR1963	mut-16(pk710) I; unc-119(ed3) III; mgSi4[ubl-1p::GFP::siR-1-sensor-ubl-1-3'UTR Cbr-unc-119(+))] IV
strain, strain background (C. elegans)	eri-7	Fischer et al, 2008	GR1814	eri-7(mg369) I
strain, strain background (C. elegans)	simr-1::gfp or simr-1::gfp::3xFLAG	This paper	USC1022	simr-1(cmp112[simr-1::GFP + loxP + 3xFLAG]) I
strain, strain background (C. elegans)	simr-1[R159C]::gfp or simr-1[R159C]::gfp::3xFLAG	This paper	USC1363	simr-1(cmp112 cmp260[simr-1[R159C]::GFP + loxP + 3xFLAG]) I
strain, strain background (C. elegans)	mut-14 smut-1	Phillips et al, 2014	GR1948	mut-14(mg464) smut-1(tm1301) V
strain, strain background (C. elegans)	mut-7 unc-119	Phillips et al, 2015	GR2108	mut-7(pk720) unc-119(ed3) III
strain, strain background (C. elegans)	simr-1; mut-14 smut-1	This paper	USC1368	simr-1(cmp36) I; mut-14(mg464) smut-1(tm1301) V
strain, strain background (C. elegans)	simr-1; mut-7 unc-119	This paper	USC1369	simr-1(cmp36) I; mut-7(pk720) unc-119(ed3) III
strain, strain background (C. elegans)	prg-1; mut-14 smut-1	Phillips et al, 2015	GR2070	prg-1(n4357) I; mut-14(mg464) smut-1(tm1301) V
strain, strain background (C. elegans)	prg-1; mut-7 unc-119	Phillips et al, 2015	GR2109	prg-1(n4357) I; mut-7(pk720) unc-119(ed3) III
strain, strain background (C. elegans)	simr-1::gfp; rsd-2::mCherry	This paper	USC1055	simr-1(cmp112[simr-1::GFP + loxP + 3xFLAG]) I; rsd-2(cmp55[rsd-2::mCherry::2xHA + loxP]) IV
strain, strain background (C. elegans)	simr-1::gfp; tagRFP::znfx-1	This paper	USC1229	simr-1(cmp112[simr-1::GFP + loxP + 3xFLAG]) I; znfx-1(gg634[HA::tagRFP::znfx-1] II
strain, strain background (C. elegans)	simr-1::gfp; mKate2::prg-1	This paper	USC1370	simr-1(cmp112[simr-1::GFP + loxP + 3xFLAG]) prg-1(cmp220[mKate2 loxP 3xMyc::prg-1]) I
strain, strain background (C. elegans)	simr-1 mKate2::prg-1	This paper	USC1371	simr-1(cmp36) prg-1(cmp220[mKate2 loxP 3xMyc::prg-1]) I
strain, strain background (C. elegans)	simr-1::gfp prg-1	This paper	USC1373	simr-1(cmp112[simr-1::GFP + loxP + 3xFLAG]) prg-1(n4357) I
strain, strain background (C. elegans)	mKate2::prg-1 or mKate2::3xMyc::prg-1	This paper	USC1232	prg-1(cmp220[mKate2 loxP 3xMyc::prg-1]) I
strain, strain background (C. elegans)	unc-119	Caenorhabditis Genetics Center (CGC)	HT1593	unc-119(ed3) III
strain, strain background (C. elegans)	mut-16; unc-119	This paper	USC715	mut-16(cmp3[mut-16::gfp::3xFLAG + loxP]) I; unc-119(ed3) III
strain, strain background (C. elegans)	simr-1; unc-119	This paper	USC791	simr-1(cmp36) I; unc-119(ed3) III
genetic reagent (E. coli)	pos-1	Kamath et al. 2003	Ahringer RNAi library	WBGene00004078
genetic reagent (E. coli)	lin-29	Kamath et al. 2003	Ahringer RNAi library	WBGene00003015
genetic reagent (E. coli)	nhr-23	Kamath et al. 2003	Ahringer RNAi library	WBGene00003622
genetic reagent (E. coli)	lir-1	Kamath et al. 2003	Ahringer RNAi library	WBGene00003044
genetic reagent (E. coli)	hmr-1	Kamath et al. 2003	Ahringer RNAi library	WBGene00001980
genetic reagent (E. coli)	dpy-13	Kamath et al. 2003	Ahringer RNAi library	WBGene00001074
antibody	Anti-FLAG M2 (Mouse monoclonal)	Sigma Aldrich	Cat# F1804, RRID:AB_262044	IF (1:1000), Western (1:1000)
antibody	Anti-HA 3F10 (Rat monoclonal)	Roche	Cat# 11867423001, RRID:AB_390918	IF (1:500)
antibody	Anit-PGL-1 (Mouse monoclonal)	DSHB	Cat# K76, RRID:AB_531836	IF (1:100)
antibody	Goat anti-mouse IgG Alexa Fluor 488	Thermo Fisher	Cat# A-11029, RRID:AB_138404	IF (1:1000)
antibody	Goat anti-Rat IgG Alexa Fluor 555	Thermo Fisher	Cat# A-21434, RRID:AB_2535855	IF (1:1000)
antibody	Goat anti-mouse IgM Alexa Fluor 647	Thermo Fisher	Cat# A21238, RRID:AB_1500930	IF (1:500)
antibody	Anti-actin IgG (Mouse monoclonal)	Abcam	Cat# ab3280, RRID:AB_303668	Western (1:10,000)
antibody	Anti-Myc 9E10 IgG (Mouse monoclonal)	Thermo Fisher	Cat# 13-2500, RRID:AB_2533008	Western(1:1000)
antibody	Goat anti-mouse IgG Secondary HRP	Thermo Fisher	Cat# A16078, RRID:AB_2534751	Western (1:10,000)
recombinant DNA reagent	pDD282	Dickinson et al. 2015	RRID:Addgene_66823
recombinant DNA reagent	pDD287	Dickinson et al. 2015	RRID:Addgene_70685
recombinant DNA reagent	pRB1017	Arribere et al. 2014	RRID:Addgene_59936
recombinant DNA reagent	Peft-3::cas9-SV40_NLS::tbb-2 3'UTR (plasmid)	Dickinson et al. 2015	RRID:Addgene_46168
recombinant DNA reagent	pJW1259	Ward et al. 2014	RRID:Addgene_61251
recombinant DNA reagent	pMA122 (plasmid)	Frokjaer-Jensen et al. 2012	RRID:Addgene_34873
recombinant DNA reagent	pDD104	Dickinson et al. 2015	RRID:Addgene_47551
commercial assay or kit	RNaseOUT Recombinant Ribonuclease Inhibitor	Thermo Fisher	Cat# 10777019
commercial assay or kit	cOmplete, Mini EDTA-free Protease Inhibitor Cocktail	Sigma Aldrich	Cat# 04693159001
commercial assay or kit	Anti-GFP mAB- Agarose (Monoclonal antibody)	MBL International	Cat# D153-8, RRID:AB_591815
commercial assay or kit	Anti-FLAG M2 Affinity Gel	Sigma Aldrich	Cat# A2220, RRID:AB_10063035
commercial assay or kit	ProteoExtract Protein Precipitation Kit	EMD Millipore	Cat# 539180
commercial assay or kit	TransFluoSpheres, 0.04um	Thermo Fisher	Cat# T10711
commercial assay or kit	NuPage 4-12% Bis-Tris Mini Protein Gel	Thermo Fisher	Cat# NP0322BOX
commercial assay or kit	15% Criterion TBE-Urea Polyacrylamide Gel	Bio-Rad	Cat# 3450091
commercial assay or kit	RNA 5’ Polyphosphatase	EpiCentre	Cat# RP8092H
commercial assay or kit	T4 RNA Ligase 2, truncated KQ	New England Biolabs	Cat# M0373L
commercial assay or kit	T4 RNA Ligase 1	New England Biolabs	Cat# M0204L
commercial assay or kit	SuperScript III	Thermo Fisher	Cat# 18080-051
commercial assay or kit	Q5 High Fidelity DNA Polymerase	New England Biolabs	Cat# M0491L
commercial assay or kit	10% Criterion TBE Polyacrylamide Gel	Bio-Rad	Cat# 3450051
commercial assay or kit	Dynabeads mRNA Purification Kit	Thermo Fisher	Cat# 61006
commercial assay or kit	NEBNext Ultra II Directional RNA Library Prep Kit	New England Biolabs	Cat# E7760S
commercial assay or kit	NEBNext Multiplex Oligos	New England Biolabs	Cat# E7335S
commercial assay or kit	Qubit 1x dsDNA HS Assay Kit	Thermo Fisher	Cat# Q33231
Software, algorithm	SoftWoRx	GE Healthcare
Software, algorithm	Adobe Photoshop	Adobe	RRID:SCR_014199
Software, algorithm	Adobe Illustrator	Adobe	RRID:SCR_014199
Software, algorithm	ImageJ	ImageJ Mosaic Plug-in	RRID:SCR_001935
Software, algorithm	Evolview V3	Subramanian et al. 2019
Software, algorithm	HHpred	Söding et al. 2005	RRID:SCR_010276
Software, algorithm	Clustal Omega	Sievers et al. 2011	RRID:SCR_001591
Software, algorithm	FASTX-Toolkit	Hannon Lab - CSHL	RRID:SCR_005534
Software, algorithm	Bowtie2	Langmead and Salzberg 2012	RRID:SCR_005476	Version 2.2.2
Software, algorithm	Subread	Liao et al. 2014;2013	RRID:SCR_009803	Version 1.5.1
Software, algorithm	Cutadapt	Martin 2011	RRID:SCR_011841	Version 1.18
Software, algorithm	HiSAT2	Kim et al. 2015	RRID:SCR_015530	Version 2.1.0
Software, algorithm	Salmon	Patro et al. 2017	RRID:SCR_017036	Version 0.14.1
Software, algorithm	DESeq2	Love et al. 2014	RRID:SCR_015687	Version 1.22.2
Software, algorithm	BioVenn	Hulsen et al. 2008
Software, algorithm	Integrated Genomics Viewer	Robinson et al. 2011	RRID:SCR_011793
Software, algorithm	WIG files for IGV	This paper	Source code 1	Python script to generate WIG files for visualization of tracks in IGV (used for Figure 5-figure supplement 1B and Figure 6-figure supplement 1C-E)
Software, algorithm	RPM for genomic regions	This paper	Source code 2	Python script to calculate reads per million (RPM) over a table of genomic regions (used for Figure 6A)
