# Supplementary material for: A tudor domain protein, SIMR-1, promotes siRNA production at piRNA-targeted mRNAs in C. elegans
Source: eLife. 2020 Apr 27;9:e56731. doi: 10.7554/eLife.56731 (PMC7255803; doi:10.7554/eLife.56731)
Supplement: Supplementary file 7. [file elife-56731-supp7.xlsx]

## Sheet: primers
Supplementary File 7. Oligonucleotides sequences used in this study.
Reagent type (species) or resource	Designation	Source or reference	Identifiers	Additional Information
sequence-based reagent	mCherry with C-term 2xHA and internal Floxed Cbr-unc-119 - F	Uebel et al, 2018	PCR primer	GTCTCAAAGGGCGAAGAAGATAAC
sequence-based reagent	mCherry with C-term 2xHA and internal Floxed Cbr-unc-119 - R	Uebel et al, 2018	PCR primer	AGCGTAGTCTGGAACGTCG
sequence-based reagent	math-33::mcherry::2xHA - 5' homology arm - F	This paper	PCR primer	GTACTCATCTGGACACGTGTG
sequence-based reagent	math-33::mcherry::2xHA - 5' homology arm - R	This paper	PCR primer	GTTCAAGATTCGGATGGCAG
sequence-based reagent	math-33::mcherry::2xHA - 3' homology arm - F	This paper	PCR primer	TGATTCAAACGGTTGTTATGATCG
sequence-based reagent	math-33::mcherry::2xHA - 3' homology arm - R	This paper	PCR primer	TGGAAGATTCGATGAGTGCC
sequence-based reagent	math-33 - 3' guide RNA - F	This paper	guide RNA oligo	tcttGCTACATTGCCGCCTTGAGG
sequence-based reagent	math-33 - 3' guide RNA - R	This paper	guide RNA oligo	aaacCCTCAAGGCGGCAATGTAGC
sequence-based reagent	math-33::mcherry::2xHA - site-directed mutagenesis of guide RNA target site	This paper	site-directed mutagenesis primer	CTACATTGCCGCCTTGAGGAAGTTCCGATTGACGAATTAG
sequence-based reagent	math-33::mcherry::2xHA - site-directed mutagenesis of guide RNA target site	This paper	site-directed mutagenesis primer	CTAATTCGTCAATCGGAACTTCCTCAAGGCGGCAATGTAG
sequence-based reagent	simr-1::mcherry::2xHA - 5' homology arm - F	This paper	PCR primer	GCCAGTTGTAACTATCTCGAGG
sequence-based reagent	simr-1::mcherry::2xHA - 5' homology arm - R	This paper	PCR primer	ATTGAATCCTTCCGCCAGTG
sequence-based reagent	simr-1::mcherry::2xHA - 3' homology arm - F	This paper	PCR primer	TAGAGACATTTCTTGTATGACTTTCG
sequence-based reagent	simr-1::mcherry::2xHA - 3' homology arm - R	This paper	PCR primer	GCTCCGATCTTGAAAATCCTG
sequence-based reagent	simr-1 - 3' guide RNA - F	This paper	guide RNA oligo	tcttGGCAGAGGCGAAATCACTGG
sequence-based reagent	simr-1 - 3' guide RNA - R	This paper	guide RNA oligo	aaacCCAGTGATTTCGCCTCTGCC
sequence-based reagent	simr-1::mcherry::2xHA - site-directed mutagenesis of guide RNA target site	This paper	site-directed mutagenesis primer	GCAGAGGCGAAATCACTGGCTGAAGGATTCAAT
sequence-based reagent	simr-1::mcherry::2xHA - site-directed mutagenesis of guide RNA target site	This paper	site-directed mutagenesis primer	ATTGAATCCTTCAGCCAGTGATTTCGCCTCTGC
sequence-based reagent	C33G3.6::mcherry::2xHA - 5' homology arm - F	This paper	PCR primer	CTCATACAATCCATACCCTG
sequence-based reagent	C33G3.6::mcherry::2xHA - 5' homology arm - R	This paper	PCR primer	ATTTCCTTCGTCACTGTTC
sequence-based reagent	C33G3.6::mcherry::2xHA - 3' homology arm - F	This paper	PCR primer	TGATATATTTCCAATATTTATGACTTG
sequence-based reagent	C33G3.6::mcherry::2xHA - 3' homology arm - R	This paper	PCR primer	GGTCTGAAAATGTTTTACGTC
sequence-based reagent	C33G3.6 - 3' guide RNA - F	This paper	guide RNA oligo	tcttGAGTCATCTTGTGAAATGCG
sequence-based reagent	C33G3.6 - 3' guide RNA - R	This paper	guide RNA oligo	aaacCGCATTTCACAAGATGACTC
sequence-based reagent	C33G3.6::mcherry::2xHA - site-directed mutagenesis of guide RNA target site	This paper	site-directed mutagenesis primer	GTCATCTTGTGAAATGCGAAGACGATGAGTTCCG
sequence-based reagent	C33G3.6::mcherry::2xHA - site-directed mutagenesis of guide RNA target site	This paper	site-directed mutagenesis primer	CGGAACTCATCGTCTTCGCATTTCACAAGATGAC
sequence-based reagent	F37C4.5::mcherry::2xHA - 5' homology arm - F	This paper	PCR primer	ACCATCACCTACCAAGTGAAC
sequence-based reagent	F37C4.5::mcherry::2xHA - 5' homology arm - R	This paper	PCR primer	GAACTTCTCCTCATAGCGAATTTG
sequence-based reagent	F37C4.5::mcherry::2xHA - 3' homology arm - F	This paper	PCR primer	TGAAGTGCTTATGCGATGATTTTTC
sequence-based reagent	F37C4.5::mcherry::2xHA - 3' homology arm - R	This paper	PCR primer	CATGCTAATCTTGTGGCTCG
sequence-based reagent	F37C4.5 - 3' guide RNA - F	This paper	guide RNA oligo	tcttGATCTTCTCCGGAGTGATGG
sequence-based reagent	F37C4.5 - 3' guide RNA - R	This paper	guide RNA oligo	aaacCCATCACTCCGGAGAAGATC
sequence-based reagent	F37C4.5::mcherry::2xHA - site-directed mutagenesis of guide RNA target site	This paper	site-directed mutagenesis primer	GCCAACCGTCGGAGCTGCCATCACTCCGGAG
sequence-based reagent	F37C4.5::mcherry::2xHA - site-directed mutagenesis of guide RNA target site	This paper	site-directed mutagenesis primer	CTCCGGAGTGATGGCAGCTCCGACGGTTGGC
sequence-based reagent	hgo-1::mcherry::2xHA - 5' homology arm - F	This paper	PCR primer	CTGCTCGTTAATCCACAAGAG
sequence-based reagent	hgo-1::mcherry::2xHA - 5' homology arm - R	This paper	PCR primer	TTTAGGCATTGTGAAATGTTTCTTG
sequence-based reagent	hgo-1::mcherry::2xHA - 3' homology arm - F	This paper	PCR primer	TAATTCCAAAATATTTGATTTTGC
sequence-based reagent	hgo-1::mcherry::2xHA - 3' homology arm - R	This paper	PCR primer	GAACTATTAGCATTTGGTGC
sequence-based reagent	hgo-1 - 3' guide RNA - F	This paper	guide RNA oligo	tcttGGAGGATTCAAGCCAGGTGG
sequence-based reagent	hgo-1 - 3' guide RNA - R	This paper	guide RNA oligo	aaacCCACCTGGCTTGAATCCTCC
sequence-based reagent	hgo-1::mcherry::2xHA - site-directed mutagenesis of guide RNA target site	This paper	site-directed mutagenesis primer	GCTATGAAGCAAAAGAAGGAGGTTTTAAACCTGGAGGTGGTTCCCTTCATTCAATG
sequence-based reagent	hgo-1::mcherry::2xHA - site-directed mutagenesis of guide RNA target site	This paper	site-directed mutagenesis primer	CATTGAATGAAGGGAACCACCTCCAGGTTTAAAACCTCCTTCTTTTGCTTCATAGC
sequence-based reagent	Y57G11C.3::mcherry::2xHA - 5' homology arm - F	This paper	PCR primer	CTCAATAAACTGGGCGCGCATG
sequence-based reagent	Y57G11C.3::mcherry::2xHA - 5' homology arm - R	This paper	PCR primer	TCCGTCAAACGGTGGAGGAG
sequence-based reagent	Y57G11C.3::mcherry::2xHA - 3' homology arm - F	This paper	PCR primer	TGAGCAGCATCTTGTGTGATAT
sequence-based reagent	Y57G11C.3::mcherry::2xHA - 3' homology arm - R	This paper	PCR primer	ATCTCACTTCTCAGCAGTACC
sequence-based reagent	Y57G11C.3 - 3' guide RNA - F	This paper	guide RNA oligo	tcttGcTCATCCGTCAAACGGTGG
sequence-based reagent	Y57G11C.3 - 3' guide RNA - R	This paper	guide RNA oligo	aaacCCACCGTTTGACGGATGAgC
sequence-based reagent	Y57G11C.3::mcherry::2xHA - site-directed mutagenesis of guide RNA target site	This paper	site-directed mutagenesis primer	GGATTCTGACTCTCCTCCGCCATTCGATGGCGTCTCAAAGGGCGAAGAAGATAAC
sequence-based reagent	Y57G11C.3::mcherry::2xHA - site-directed mutagenesis of guide RNA target site	This paper	site-directed mutagenesis primer	GTTATCTTCTTCGCCCTTTGAGACGCCATCGAATGGCGGAGGAGAGTCAGAATCC
sequence-based reagent	hpo-40::mcherry::2xHA - 5' homology arm - F	This paper	PCR primer	AATTTGGTCGCCAGATTTCGCC
sequence-based reagent	hpo-40::mcherry::2xHA - 5' homology arm - R	This paper	PCR primer	GTCGAACGCGGCTTCCAACTTC
sequence-based reagent	hpo-40::mcherry::2xHA - 3' homology arm - F	This paper	PCR primer	TAGTATTATTTCATTAATATTTTTTATGTC
sequence-based reagent	hpo-40::mcherry::2xHA - 3' homology arm - R	This paper	PCR primer	GGATAAGAATGAAAAAGTAGGC
sequence-based reagent	hpo-40 - 3' guide RNA - F	This paper	guide RNA oligo	tcttGTGGAAAATGAAAATTGTGG
sequence-based reagent	hpo-40 - 3' guide RNA - R	This paper	guide RNA oligo	aaacCCACAATTTTCATTTTCCAC
sequence-based reagent	hpo-40::mcherry::2xHA - site-directed mutagenesis of guide RNA target site	This paper	site-directed mutagenesis primer	GCGCTTTTGGAAAATGAAAATTGTGGAAGCTAGGAAGTTGGAAGCCGCG
sequence-based reagent	hpo-40::mcherry::2xHA - site-directed mutagenesis of guide RNA target site	This paper	site-directed mutagenesis primer	CGCGGCTTCCAACTTCCTAGCTTCCACAATTTTCATTTTCCAAAAGCGC
sequence-based reagent	rsd-2::mcherry::2xHA - 5' homology arm - F	This paper	PCR primer	GCATTATTCGGAAATGTCGAACG
sequence-based reagent	rsd-2::mcherry::2xHA - 5' homology arm - R	This paper	PCR primer	GTTCCCGTACTTTTCGTAATAATGAC
sequence-based reagent	rsd-2::mcherry::2xHA - 3' homology arm - F	This paper	PCR primer	TAAAGGATCATTGACTAACAGTTTAC
sequence-based reagent	rsd-2::mcherry::2xHA - 3' homology arm - R	This paper	PCR primer	TGAAAACCAATTAATACAGGGC
sequence-based reagent	rsd-2 - 3' guide RNA - F	This paper	guide RNA oligo	tcttGTCATTATTACGAAAAGTAC
sequence-based reagent	rsd-2 - 3' guide RNA - R	This paper	guide RNA oligo	aaacGTACTTTTCGTAATAATGAC
sequence-based reagent	rsd-2::mcherry::2xHA - site-directed mutagenesis of guide RNA target site	This paper	site-directed mutagenesis primer	GCGTCATTATTACGAAAAGTACGGAAACGTCTCAAAGGGCGAAGAAG
sequence-based reagent	rsd-2::mcherry::2xHA - site-directed mutagenesis of guide RNA target site	This paper	site-directed mutagenesis primer	CTTCTTCGCCCTTTGAGACGTTTCCGTACTTTTCGTAATAATGACGC
sequence-based reagent	Floxed Cbr-unc-119 - F	This paper	PCR primer	TTACAGTGACGCAAGACTCAAG
sequence-based reagent	Floxed Cbr-unc-119 - R	This paper	PCR primer	AAATTCTCCATCTTGGAGGCTG
sequence-based reagent	simr-1 deletion (2542 bp) - 5' homology arm - F	This paper	PCR primer	ACTATATTCTCCACGTCAGTGAAGGG
sequence-based reagent	simr-1 deletion (2542 bp) - 5' homology arm - R	This paper	PCR primer	GGGCCTTTGCTAGATTGCGAATG
sequence-based reagent	simr-1 deletion (2542 bp) - 3' homology arm - F	This paper	PCR primer	GGATTCAATTAGAGACATTTCTTGTATG
sequence-based reagent	simr-1 deletion (2542 bp) - 3' homology arm - R	This paper	PCR primer	GCTCCGATCTTGAAAATCCTG
sequence-based reagent	simr-1 - 5' guide RNA - F	This paper	guide RNA oligo	tcttGTTATTTGAATTAATATAGG
sequence-based reagent	simr-1 - 5' guide RNA - R	This paper	guide RNA oligo	aaacCCTATATTAATTCAAATAAC
sequence-based reagent	hpo-40 deletion (3019 bp) - 5' homology arm - F	This paper	PCR primer	CAATTACTCTTGCGACATTCGAAG
sequence-based reagent	hpo-40 deletion (3019 bp) - 5' homology arm - R	This paper	PCR primer	TGTTTTTCTGATTCCTAAAACTAGAACTG
sequence-based reagent	hpo-40 deletion (3019 bp) - 3' homology arm - F	This paper	PCR primer	CTAGGAAGTTGGAAGCCGCG
sequence-based reagent	hpo-40 deletion (3019 bp) - 3' homology arm - R	This paper	PCR primer	GGCGTATACGAGCAAGTGAATGAG
sequence-based reagent	Y57G11C.3 deletion (854 bp) - 5' homology arm - F	This paper	PCR primer	GTGGAAGTCGTCGAAGAAATCC
sequence-based reagent	Y57G11C.3 deletion (854 bp) - 5' homology arm - R	This paper	PCR primer	TGATATTCTCCACGGAATGAGCG
sequence-based reagent	Y57G11C.3 deletion (854 bp) - 3' homology arm - F	This paper	PCR primer	GACGGATGAGCAGCATCTTG
sequence-based reagent	Y57G11C.3 deletion (854 bp) - 3' homology arm - R	This paper	PCR primer	AGACGATGGATGACCGGTAAC
sequence-based reagent	C33G3.6 deletion (3838 bp) - 5' homology arm - F	This paper	PCR primer	CAGTGAGAAACGGTGAGGACTC
sequence-based reagent	C33G3.6 deletion (3838 bp) - 5' homology arm - R	This paper	PCR primer	TGGAAGCTATGGAGGAACAAGG
sequence-based reagent	C33G3.6 deletion (3838 bp) - 3' homology arm - F	This paper	PCR primer	GCTTGCTAGATCAATATTGTTAAG
sequence-based reagent	C33G3.6 deletion (3838 bp) - 3' homology arm - R	This paper	PCR primer	GGTCTGAAAATGTTTTACGTC
sequence-based reagent	simr-1::gfp::3xFLAG - 5' homology arm - F	This paper	PCR primer	GCCAGTTGTAACTATCTCGAG
sequence-based reagent	simr-1::gfp::3xFLAG - 5' homology arm - R	This paper	PCR primer	ATTGAATCCTTCaGCCAGTGATTTCG
sequence-based reagent	simr-1::gfp::3xFLAG - 3' homology arm - F	This paper	PCR primer	TAGAGACATTTCTTGTATGACTTTCG
sequence-based reagent	simr-1::gfp::3xFLAG - 3' homology arm - R	This paper	PCR primer	GCTCCGATCTTGAAAATCCTG
sequence-based reagent	mKate2::3xMyc::prg-1 - 5' homology arm - F	This paper	PCR primer	AGATAGAAGGGCAAGCGTCG
sequence-based reagent	mKate2::3xMyc::prg-1 - 5' homology arm - R	This paper	PCR primer	TATTACCTGAAAAATATTATAGAAAAC
sequence-based reagent	mKate2::3xMyc::prg-1 - 3' homology arm - F	This paper	PCR primer	ATGGCATCTGGAAGTGGTCG
sequence-based reagent	mKate2::3xMyc::prg-1 - 3' homology arm - R	This paper	PCR primer	TTGTGGATTGTTCTGGCACG
sequence-based reagent	mKate2::3xMyc::prg-1 - guide RNA - F	This paper	guide RNA oligo	tcttGTTCAGGTAATAATGGCATC
sequence-based reagent	mKate2::3xMyc::prg-1 - guide RNA - R	This paper	guide RNA oligo	aaacGATGCCATTATTACCTGAAC
sequence-based reagent	R159C into simr-1::gfp::3xFLAG - repair template	This paper	repair template	GTCCTACTGAAGCCGAAATCACCCCTGGCACCATCTATATCTTCAAGCAtCGAGATAACAAGTGTTATtGCTGCGTaATatTATTTGAAGATGGAGACAACAACGTTTCAGACGCTGATCGCAAATACATG
sequence-based reagent	R159C into simr-1::gfp::3xFLAG - crRNA	This paper	crRNA	AGCGAUAACACUUGUUAUCUGUUUUAGAGCUAUGCU
sequence-based reagent	dpy-10(cn64) - repair template	Arribere et al, 2014	repair template	CACTTGAACTTCAATACGGCAAGATGAGAATGACTGGAAACCGTACCGCATGCGGTGCCTATGGTAGCGGAGCTTCACATGGCTTCAGACCAACAGCCTAT
sequence-based reagent	dpy-10(cn64) - crRNA	This paper	crRNA	GCUACCAUAGGCACCACGAGGUUUUAGAGCUAUGCU
