# Supplementary material for: A tudor domain protein, SIMR-1, promotes siRNA production at piRNA-targeted mRNAs in C. elegans
Source: eLife. 2020 Apr 27;9:e56731. doi: 10.7554/eLife.56731 (PMC7255803; doi:10.7554/eLife.56731)
Supplement: Supplementary file 8. [file elife-56731-supp8.xlsx]

## Sheet: Sheet1
Supplementary File 8. Statistical analysis.
Experiment	Condition	Statistical test	Mean 1	Mean 2	p-value
Fig. 3A wild-type vs simr-1 brood size	20°C	t-test	286.5	265.5	0.2103
Fig. 3A wild-type vs simr-1 brood size	25°C generation 1	t-test	170.9	108.8	2.72e-05
Fig. 3A wild-type vs simr-1 brood size	25°C generation 2	t-test	192.1	103.5	0.000196
Fig. 3A wild-type vs simr-1 brood size	25°C generation 3	t-test	151.2	75.5	0.00127
Fig. 3A wild-type vs simr-1 brood size	25°C generation 4	t-test	143.6	56.9	5.55e-05
Fig. 3A wild-type vs simr-1 brood size	25°C generation 5	t-test	132.9	40.6	0.000306
Fig. 3A wild-type vs simr-1 brood size	25°C generation 6	t-test	130.9	18.8	8.85e-09
Fig. 3A wild-type vs simr-1 brood size	25°C generation 7	t-test	122.1	24.4	1.39e-07
Fig. 3A wild-type vs simr-1 brood size	25°C generation 8	t-test	146.3	30.8	4.5e-05
Fig. 3A wild-type vs simr-1 brood size	25°C generation 9	t-test	139.8	40.3	0.000374
Fig. 3A wild-type vs simr-1 brood size	25°C generation 10	t-test	121.5	15.6	0.000698
Fig. 3A wild-type vs simr-1 brood size	25°C generation 11	t-test	119	0	9.382e-05
Fig. 3A wild-type vs mut-16 brood size	20°C	t-test	286.5	150.1	0.000273
Fig. 3A wild-type vs mut-16 brood size	25°C generation 1	t-test	170.9	7.1	9.661e-11
Fig. 3A wild-type vs mut-16 brood size	25°C generation 2	t-test	192.1	0	1.863e-08
Fig. 3B wild-type vs simr-1 brood size	25°C generation 10	t-test	121.5	15.6	0.000698
Fig. 3B wild-type vs simr-1 brood size	20°C generation 11	t-test	212.6	180.2	0.196
Fig. 3B wild-type vs simr-1 brood size	20°C generation 12	t-test	257.1	85.1	2.45e-05
Fig. 3B wild-type vs simr-1 brood size	20°C generation 13	t-test	284	153.6	0.000307
Fig. 3B wild-type vs simr-1 brood size	20°C generation 14	t-test	243.6	193.3	0.0858
Fig. 3B wild-type vs simr-1 brood size	20°C generation 15	t-test	247.1	146.9	0.00595
Fig. 3B wild-type vs simr-1 brood size	20°C generation 16	t-test	256	176.4	0.0504
Fig. 3B wild-type vs simr-1 brood size	20°C generation 17	t-test	227.7	180.2	0.00769
Fig. 3B wild-type vs simr-1 brood size	20°C generation 18	t-test	222.4	169.8	0.0113
Fig. 3B wild-type vs simr-1 brood size	20°C generation 19	t-test	228.8	169.7	0.0153
Fig. 3B wild-type vs simr-1 brood size	20°C generation 20	t-test	216.3	130.8	0.00525
Fig. 3C wild-type vs. simr-1 males x fog-2 females	20°C	t-test	467.8	407.4	0.0738
Fig. 3C wild-type vs. simr-1 males x fog-2 females	25°C generation 1	t-test	167	59.3333	0.0614
Fig. 3C wild-type vs. simr-1 males x fog-2 females	25°C generation 10	t-test	144.2	8.9	0.0006
Fig. 3D pgl-1::gfp males x wild-type vs simr-1 hermaphrodites	20°C	t-test	375.6	336.9	0.0891
Fig. 3D pgl-1::gfp males x wild-type vs simr-1 hermaphrodites	25°C generation 1	t-test	273	221.4	0.0526
Fig. 3D pgl-1::gfp males x wild-type vs simr-1 hermaphrodites	25°C generation 10	t-test	289	18.1111	0.0008
Fig. 3E apoptotic cells per gonad arm in wild-type vs. simr-1	20°C	t-test	5.0625	4.96774	0.44
Fig. 3E apoptotic cells per gonad arm in wild-type vs. simr-1	25°C generation 1	t-test	28.8571	22.0476	0.0108
Fig. 3E apoptotic cells per gonad arm in wild-type vs. simr-1	25°C generation 2	t-test	9.14286	11.1429	0.0369
Fig. 3E apoptotic cells per gonad arm in wild-type vs. simr-1	25°C generation 4	t-test	18.9091	17.45	0.279
Fig. 3E apoptotic cells per gonad arm in wild-type vs. simr-1	25°C generation 7	t-test	16	18.4348	0.1
Fig. 3E apoptotic cells per gonad arm in wild-type vs. simr-1	25°C generation 10	t-test	14.8636	23.7727	1.14e-05
Fig. 3E apoptotic cells per gonad arm in wild-type vs. simr-1	25°C generation 11	t-test	15.7619	24.85	4.2e-07
Fig S3A wild-type vs simr-1; hpo-40 brood size	20°C	t-test	286.5	239.8	0.0558
Fig S3A wild-type vs simr-1; hpo-40 brood size	25°C generation 1	t-test	170.9	95.8	1.387e-06
Fig S3A wild-type vs simr-1; hpo-40 brood size	25°C generation 2	t-test	192.1	121.1	4.944e-05
Fig S3A wild-type vs simr-1; hpo-40 brood size	25°C generation 3	t-test	151.2	78.7	0.00121
Fig S3A wild-type vs simr-1; hpo-40 brood size	25°C generation 4	t-test	143.6	42.5	9.42e-06
Fig S3A wild-type vs simr-1; hpo-40 brood size	25°C generation 5	t-test	132.9	29	9.54e-05
Fig S3A wild-type vs simr-1; hpo-40 brood size	25°C generation 6	t-test	130.9	14.4	2.07e-09
Fig S3A wild-type vs simr-1; hpo-40 brood size	25°C generation 7	t-test	122.1	14.6	1.59e-09
Fig S3A wild-type vs simr-1; hpo-40 brood size	25°C generation 8	t-test	146.3	42.8	0.000102
Fig S3A wild-type vs simr-1; hpo-40 brood size	25°C generation 9	t-test	139.8	23	0.000102
Fig S3A wild-type vs simr-1; hpo-40 brood size	25°C generation 10	t-test	121.5	8.3	0.000446
Fig S3A wild-type vs simr-1; hpo-40 brood size	25°C generation 11	t-test	119	6.5	0.000107
Fig S3A wild-type vs hpo-40 brood size	20°C	t-test	286.5	252.9	0.0727
Fig S3A wild-type vs hpo-40 brood size	25°C generation 1	t-test	170.9	162.7	0.326
Fig S3A wild-type vs hpo-40 brood size	25°C generation 2	t-test	192.1	152.1	0.0266
Fig S3A wild-type vs hpo-40 brood size	25°C generation 3	t-test	151.2	157	0.391
Fig S3A wild-type vs hpo-40 brood size	25°C generation 4	t-test	143.6	118.8	0.13
Fig S3A wild-type vs hpo-40 brood size	25°C generation 5	t-test	132.9	131.7	0.48
Fig S3A wild-type vs hpo-40 brood size	25°C generation 6	t-test	130.9	86.7	0.0336
Fig S3A wild-type vs hpo-40 brood size	25°C generation 7	t-test	122.1	106.8	0.178
Fig S3A wild-type vs hpo-40 brood size	25°C generation 8	t-test	146.3	139.6	0.41
Fig S3A wild-type vs hpo-40 brood size	25°C generation 9	t-test	139.8	127.2	0.306
Fig S3A wild-type vs hpo-40 brood size	25°C generation 10	t-test	121.5	101.4	0.269
Fig S3A wild-type vs hpo-40 brood size	25°C generation 11	t-test	119	121.3	0.463
Fig. 5B log2(fold change) siRNA abundance (simr-1/wildtype) - 20°C	all siRNA targets vs. CSR-1 targets	t-test			1.9e-127
Fig. 5B log2(fold change) siRNA abundance (simr-1/wildtype) - 20°C	all siRNA targets vs. Mutator targets	t-test			8.1e-102
Fig. 5B log2(fold change) siRNA abundance (simr-1/wildtype) - 20°C	all siRNA targets vs. piRNA targets	t-test			1.3e-116
Fig. 5B log2(fold change) siRNA abundance (simr-1/wildtype) - 20°C	all siRNA targets vs. ERGO-1 targets	t-test			2.5e-08
Fig. 5B log2(fold change) siRNA abundance (simr-1/wildtype) - 20°C	all siRNA targets vs. PRG-1-independent Mutator targets	t-test			0.8
Fig. 5B log2(fold change) siRNA abundance (simr-1/wildtype) - 20°C	Mutator targets vs. PRG-1-independent Mutator targets	t-test			1.8e-24
Fig. 5B log2(fold change) siRNA abundance (simr-1/wildtype) - 20°C	piRNA targets vs. PRG-1-independent Mutator targets	t-test			1.1e-30
Fig. 5E piRNA Read per million in wild-type vs. simr-1	20°C	t-test	31201	29477	0.461133
Fig. 5E piRNA Read per million in wild-type vs. simr-1	25°C generation 1	t-test	6543.36	8163.34	0.235864
Fig. S5A log2(fold change) siRNA abundance (simr-1/wildtype) - 25°C	all siRNA targets vs. CSR-1 targets	t-test			0
Fig. S5A log2(fold change) siRNA abundance (simr-1/wildtype) - 25°C	all siRNA targets vs. Mutator targets	t-test			4e-246
Fig. S5A log2(fold change) siRNA abundance (simr-1/wildtype) - 25°C	all siRNA targets vs. piRNA targets	t-test			1.4e-17
Fig. S5A log2(fold change) siRNA abundance (simr-1/wildtype) - 25°C	all siRNA targets vs. ERGO-1 targets	t-test			4.1e-39
Fig. S5A log2(fold change) siRNA abundance (simr-1/wildtype) - 25°C	all siRNA targets vs. PRG-1-independent Mutator targets	t-test			9e-26
Fig. S5A log2(fold change) siRNA abundance (simr-1/wildtype) - 25°C	Mutator targets vs. PRG-1-independent Mutator targets	t-test			1.8e-08
Fig. S5A log2(fold change) siRNA abundance (simr-1/wildtype) - 25°C	piRNA targets vs. PRG-1-independent Mutator targets	t-test			5.3e-06
Fig. S5D log2(fold change) siRNA abundance (simr-1/wildtype) - piRNA targets	simr-1 20°C vs. simr-1 25°C gen 1	t-test			5.75e-11
Fig. S5D log2(fold change) siRNA abundance (simr-1/wildtype) - piRNA targets	simr-1 25°C gen 1 vs. simr-1 25°C gen 2	t-test			0.66514
Fig. S5D log2(fold change) siRNA abundance (simr-1/wildtype) - piRNA targets	simr-1 25°C gen 2 vs. simr-1 25°C gen 7	t-test			3.99e-10
Fig. S5D log2(fold change) siRNA abundance (simr-1/wildtype) - piRNA targets	simr-1 25°C gen 7 vs. simr-1 25°C gen 10	t-test			0.00167776
Fig. S5D log2(fold change) siRNA abundance (simr-1/wildtype) - piRNA targets	simr-1 25°C gen 1 vs. simr-1 25°C gen 10	t-test			3.98e-20
Fig. 6D log2(fold change) histone siRNA abundance (mutant/wildtype)	simr-1 vs. mut-16 - 20°C	t-test			4.4e-10
Fig. 6D log2(fold change) histone siRNA abundance (mutant/wildtype)	simr-1 vs. prg-1 - 20°C	t-test			9.5e-11
Fig. 6D log2(fold change) histone siRNA abundance (mutant/wildtype)	simr-1 gen 1 vs. mut-16 - 25°C	t-test			4.4e-11
Fig. 6D log2(fold change) histone siRNA abundance (mutant/wildtype)	simr-1 gen 2 vs. mut-16 - 25°C	t-test			2.3e-10
Fig. 6D log2(fold change) histone siRNA abundance (mutant/wildtype)	simr-1 gen 7 vs. mut-16 - 25°C	t-test			9.9e-07
Fig. 6D log2(fold change) histone siRNA abundance (mutant/wildtype)	simr-1 gen 10 vs. mut-16 - 25°C	t-test			0.00094
Fig. 6G enrichment analysis of up and down-regulated genes in simr-1 mutant	simr-1 20°C up-regulated vs. CSR-1 targets	Fisher exact test			0.99998
Fig. 6G enrichment analysis of up and down-regulated genes in simr-1 mutant	simr-1 20°C up-regulated vs. mutator targets	Fisher exact test			7.9572e-11
Fig. 6G enrichment analysis of up and down-regulated genes in simr-1 mutant	simr-1 20°C up-regulated vs. PRG-1 targets	Fisher exact test			3.52094e-07
Fig. 6G enrichment analysis of up and down-regulated genes in simr-1 mutant	simr-1 20°C up-regulated vs. ALG-3/4 targets	Fisher exact test			0.132529
Fig. 6G enrichment analysis of up and down-regulated genes in simr-1 mutant	simr-1 20°C up-regulated vs. Oogenic genes	Fisher exact test			0.880125
Fig. 6G enrichment analysis of up and down-regulated genes in simr-1 mutant	simr-1 20°C up-regulated vs. Spermatogenic genes	Fisher exact test			0.0345955
Fig. 6G enrichment analysis of up and down-regulated genes in simr-1 mutant	simr-1 20°C down-regulated vs. CSR-1 targets	Fisher exact test			0.208109
Fig. 6G enrichment analysis of up and down-regulated genes in simr-1 mutant	simr-1 20°C down-regulated vs. mutator targets	Fisher exact test			2.34277e-39
Fig. 6G enrichment analysis of up and down-regulated genes in simr-1 mutant	simr-1 20°C down-regulated vs. PRG-1 targets	Fisher exact test			3.00002e-18
Fig. 6G enrichment analysis of up and down-regulated genes in simr-1 mutant	simr-1 20°C down-regulated vs. ALG-3/4 targets	Fisher exact test			0.42274
Fig. 6G enrichment analysis of up and down-regulated genes in simr-1 mutant	simr-1 20°C down-regulated vs. Oogenic genes	Fisher exact test			0.955516
Fig. 6G enrichment analysis of up and down-regulated genes in simr-1 mutant	simr-1 20°C down-regulated vs. Spermatogenic genes	Fisher exact test			0.480401
Fig. 6G enrichment analysis of up and down-regulated genes in simr-1 mutant	simr-1 exclusive to 25°C up-regulated vs. CSR-1 targets	Fisher exact test			0.994414
Fig. 6G enrichment analysis of up and down-regulated genes in simr-1 mutant	simr-1 exclusive to 25°C up-regulated vs. mutator targets	Fisher exact test			1.83444e-51
Fig. 6G enrichment analysis of up and down-regulated genes in simr-1 mutant	simr-1 exclusive to 25°C up-regulated vs. PRG-1 targets	Fisher exact test			7.1307e-26
Fig. 6G enrichment analysis of up and down-regulated genes in simr-1 mutant	simr-1 exclusive to 25°C up-regulated vs. ALG-3/4 targets	Fisher exact test			5.72045e-16
Fig. 6G enrichment analysis of up and down-regulated genes in simr-1 mutant	simr-1 exclusive to 25°C up-regulated vs. Oogenic genes	Fisher exact test			0.91851
Fig. 6G enrichment analysis of up and down-regulated genes in simr-1 mutant	simr-1 exclusive to 25°C up-regulated vs. Spermatogenic genes	Fisher exact test			5.2454e-20
Fig. 6G enrichment analysis of up and down-regulated genes in simr-1 mutant	simr-1 exclusive to 25°C down-regulated vs. CSR-1 targets	Fisher exact test			1
Fig. 6G enrichment analysis of up and down-regulated genes in simr-1 mutant	simr-1 exclusive to 25°C down-regulated vs. mutator targets	Fisher exact test			1
Fig. 6G enrichment analysis of up and down-regulated genes in simr-1 mutant	simr-1 exclusive to 25°C down-regulated vs. PRG-1 targets	Fisher exact test			0.735034
Fig. 6G enrichment analysis of up and down-regulated genes in simr-1 mutant	simr-1 exclusive to 25°C down-regulated vs. ALG-3/4 targets	Fisher exact test			0.279943
Fig. 6G enrichment analysis of up and down-regulated genes in simr-1 mutant	simr-1 exclusive to 25°C down-regulated vs. Oogenic genes	Fisher exact test			1
Fig. 6G enrichment analysis of up and down-regulated genes in simr-1 mutant	simr-1 exclusive to 25°C down-regulated vs. Spermatogenic genes	Fisher exact test			1
Fig. 6I log2(fold change) histone mRNA abundance (mutant/wildtype)	simr-1 vs. mut-16 - 20°C	t-test			0.0001
Fig. 7 distance between SIMR-1 and neighboring foci	SIMR-1-to-RSD-2 vs. SIMR-1-to-MUT-16	t-test	0.116028	0.205076	0.00105123
Fig. 7 distance between SIMR-1 and neighboring foci	SIMR-1-to-RSD-2 vs. SIMR-1-to-ZNFX-1	t-test	0.116028	0.179733	0.0130882
Fig. 7 distance between SIMR-1 and neighboring foci	SIMR-1-to-RSD-2 vs. SIMR-1-to-PGL-1	t-test	0.116028	0.259223	2.75563e-07
Fig. 7 distance between SIMR-1 and neighboring foci	SIMR-1-to-MUT-16 vs. SIMR-1-to-ZNFX-1	t-test	0.205076	0.179733	0.439365
Fig. 7 distance between SIMR-1 and neighboring foci	SIMR-1-to-ZNFX-1 vs. SIMR-1-to-PGL-1	t-test	0.179733	0.259223	0.0121952
