# Supplementary material for: A tudor domain protein, SIMR-1, promotes siRNA production at piRNA-targeted mRNAs in C. elegans
Source: eLife. 2020 Apr 27;9:e56731. doi: 10.7554/eLife.56731 (PMC7255803; doi:10.7554/eLife.56731)
Supplement: Supplementary file 9. [file elife-56731-supp9.xlsx]

## Sheet: Sequencing Stats
Supplementary File 9. Sequencing library statistics.
Description	Type	Genotype	Stage	Total Reads	Trimmed and Quality Filtered Reads	Mapped to WS258 Reads
rsd-2 - preliminary analysis	small RNA	rsd-2(pk3307) IV	1-day-old adult	9694780	9534094	8480918
rde-8 - preliminary analysis	small RNA	rde-8(tm2252) IV	1-day-old adult	5406845	5282271	4693454
Y57G11C.3 - preliminary analysis	small RNA	Y57G11C.3(cmp47) IV	1-day-old adult	6900255	6772250	5962843
C33G3.6 - preliminary analysis	small RNA	C33G3.6(cmp44) X	1-day-old adult	5870146	5726531	5234971
simr-1; hpo-40 - preliminary analysis	small RNA	simr-1(cmp36) I; hpo-40(cmp46) V	1-day-old adult	6308958	5975390	5330643
wild-type - preliminary analysis	small RNA	wild-type	1-day-old adult	85823594	83485141	73337117
simr-1 - preliminary analysis	small RNA	simr-1(cmp36) I	1-day-old adult	4195723	4016206	3519773
wago-1 - preliminary analysis	small RNA	wago-1 (tm1414) I	1-day-old adult	10171586	9929950	8573766
hpo-40 - preliminary analysis	small RNA	hpo-40(cmp46) V	1-day-old adult	6934899	6767849	6026585
math-33 - preliminary analysis	small RNA	math-33(ok2974) V	1-day-old adult (asynchronous)	5573955	5437009	4683741
nyn-2; nyn-1 - preliminary analysis	small RNA	nyn-2(tm4844) I; nyn-1(tm5004) IV	1-day-old adult	6080185	5927167	5300648
mut-16 - preliminary analysis	small RNA	mut-16(pk710) I	1-day-old adult	5430054	5127500	4356421
hgo-1 - preliminary analysis	small RNA	hgo-1(tm4989) I	1-day-old adult	6392733	6279389	5614605
F37C4.5 - preliminary analysis	small RNA	F37C4.5(ok3454) IV	1-day-old adult	8476395	8221016	7224375
wild-type - 20°C, replicate 1	small RNA	wild-type	1-day-old adult	7515869	7212303	6469790
wild-type - 20°C, replicate 2	small RNA	wild-type	1-day-old adult	6765225	6491852	5802653
wild-type - 25°C, 1 generation, replicate 1	small RNA	wild-type	1-day-old adult	7281498	7028014	6517730
wild-type - 25°C, 1 generation, replicate 2	small RNA	wild-type	1-day-old adult	7620872	7332798	6773989
wild-type - 25°C, 2 generations, replicate 1	small RNA	wild-type	1-day-old adult	7751553	7431507	6853639
wild-type - 25°C, 2 generations, replicate 2	small RNA	wild-type	1-day-old adult	11304236	10930132	10107439
wild-type - 25°C, 7 generations, replicate 1	small RNA	wild-type	1-day-old adult	9291673	8978968	7937908
wild-type - 25°C, 7 generations, replicate 2	small RNA	wild-type	1-day-old adult	12702683	12250563	10427108
wild-type - 25°C, 10 generations, replicate 1	small RNA	wild-type	1-day-old adult	10630429	10251639	9215366
wild-type - 25°C, 10 generations, replicate 2	small RNA	wild-type	1-day-old adult	9434910	8997326	8095087
simr-1 - 20°C, replicate 1	small RNA	simr-1(cmp36) I	1-day-old adult	16080161	15622656	14045701
simr-1 - 20°C, replicate 2	small RNA	simr-1(cmp36) I	1-day-old adult	15028119	14636221	13205894
simr-1 - 25°C, 1 generation, replicate 1	small RNA	simr-1(cmp36) I	1-day-old adult	8887484	8670022	7879382
simr-1 - 25°C, 1 generation, replicate 2	small RNA	simr-1(cmp36) I	1-day-old adult	20861179	20264979	18408117
simr-1 - 25°C, 2 generations, replicate 1	small RNA	simr-1(cmp36) I	1-day-old adult	17593945	16931543	15838985
simr-1 - 25°C, 2 generations, replicate 2	small RNA	simr-1(cmp36) I	1-day-old adult	18415051	17874304	16705830
simr-1 - 25°C, 7 generations, replicate 1	small RNA	simr-1(cmp36) I	1-day-old adult	23598963	22842669	20522243
simr-1 - 25°C, 7 generations, replicate 2	small RNA	simr-1(cmp36) I	1-day-old adult	21305448	20506544	17845036
simr-1 - 25°C, 10 generations, replicate 1	small RNA	simr-1(cmp36) I	1-day-old adult	8936273	8504968	7315849
simr-1 - 25°C, 10 generations, replicate 2	small RNA	simr-1(cmp36) I	1-day-old adult	8819684	8428833	6969559
wild-type - 20°C, replicate 1	small RNA	wild-type	1-day-old adult	15664591	14019479	12553557
wild-type - 20°C, replicate 2	small RNA	wild-type	1-day-old adult	17039480	16496241	14299079
wild-type - 20°C, replicate 3	small RNA	wild-type	1-day-old adult	14664294	14118665	12051497
wild-type - 25°C, replicate 1	small RNA	wild-type	1-day-old adult	28595375	27159839	24536130
wild-type - 25°C, replicate 2	small RNA	wild-type	1-day-old adult	16765720	15795511	14127696
wild-type - 25°C, replicate 3	small RNA	wild-type	1-day-old adult	13859906	6906107	5984266
mut-16 - 20°C, replicate 1	small RNA	mut-16(pk710) I	1-day-old adult	28316986	26636431	23129843
mut-16 - 20°C, replicate 2	small RNA	mut-16(pk710) I	1-day-old adult	16673261	15200963	13333752
mut-16 - 20°C, replicate 3	small RNA	mut-16(pk710) I	1-day-old adult	15792300	14839612	13031983
mut-16 - 25°C, replicate 1	small RNA	mut-16(pk710) I	1-day-old adult	16727464	13747388	12274693
mut-16 - 25°C, replicate 2	small RNA	mut-16(pk710) I	1-day-old adult	16731680	15510037	14157683
mut-16 - 25°C, replicate 3	small RNA	mut-16(pk710) I	1-day-old adult	15096059	14372239	13110756
prg-1 - 20°C, replicate 1	small RNA	prg-1(n4357) I	1-day-old adult	24652114	24189813	17647958
prg-1 - 20°C, replicate 2	small RNA	prg-1(n4357) I	1-day-old adult	27018644	26555932	22593685
prg-1 - 20°C, replicate 3	small RNA	prg-1(n4357) I	1-day-old adult	22596357	22192002	20254537
ergo-1 - 20°C, replicate 1	small RNA	ergo-1(tm1860) V	1-day-old adult	21110685	20770814	19204531
ergo-1 - 20°C, replicate 2	small RNA	ergo-1(tm1860) V	1-day-old adult	22198187	21764683	19935565
ergo-1 - 20°C, replicate 3	small RNA	ergo-1(tm1860) V	1-day-old adult	24733347	24308121	22217412
wild-type - 20°C, replicate 1	mRNA	wild-type	1-day-old adult	25614241	25601882	23895843
wild-type - 20°C, replicate 2	mRNA	wild-type	1-day-old adult	30151450	30142494	28207470
wild-type - 20°C, replicate 3	mRNA	wild-type	1-day-old adult	12737162	12730756	11797921
wild-type - 25°C, 1 generation, replicate 1	mRNA	wild-type	1-day-old adult	31831194	31805125	29707640
wild-type - 25°C, 1 generation, replicate 2	mRNA	wild-type	1-day-old adult	23889418	23871728	22153569
wild-type - 25°C, 1 generation, replicate 3	mRNA	wild-type	1-day-old adult	26771747	26745446	24796005
wild-type - 25°C, 2 generation, replicate 1	mRNA	wild-type	1-day-old adult	46715194	46683573	45626273
wild-type - 25°C, 2 generation, replicate 2	mRNA	wild-type	1-day-old adult	28149039	28123409	26186473
wild-type - 25°C, 2 generation, replicate 3	mRNA	wild-type	1-day-old adult	35034880	35003264	34176714
wild-type - 25°C, 7 generation, replicate 1	mRNA	wild-type	1-day-old adult	41074167	41044539	40140823
wild-type - 25°C, 7 generation, replicate 2	mRNA	wild-type	1-day-old adult	51199201	51176837	50069916
wild-type - 25°C, 7 generation, replicate 3	mRNA	wild-type	1-day-old adult	47651331	47622271	46607416
wild-type - 25°C, 10 generation, replicate 1	mRNA	wild-type	1-day-old adult	25392672	25376758	23586946
wild-type - 25°C, 10 generation, replicate 2	mRNA	wild-type	1-day-old adult	28354338	28340323	26429564
wild-type - 25°C, 10 generation, replicate 3	mRNA	wild-type	1-day-old adult	24383255	24368982	22458619
simr-1 - 20°C, replicate 1	mRNA	simr-1(cmp36) I	1-day-old adult	22445988	22425876	20944222
simr-1 - 20°C, replicate 2	mRNA	simr-1(cmp36) I	1-day-old adult	17531762	17520571	16367024
simr-1 - 20°C, replicate 3	mRNA	simr-1(cmp36) I	1-day-old adult	23371441	23351308	21737603
simr-1 - 25°C, 1 generation, replicate 1	mRNA	simr-1(cmp36) I	1-day-old adult	26824532	26806741	25004060
simr-1 - 25°C, 1 generation, replicate 2	mRNA	simr-1(cmp36) I	1-day-old adult	22467829	22452222	20939971
simr-1 - 25°C, 1 generation, replicate 3	mRNA	simr-1(cmp36) I	1-day-old adult	26785197	26771914	26164490
simr-1 - 25°C, 2 generation, replicate 1	mRNA	simr-1(cmp36) I	1-day-old adult	44424137	44398695	43408658
simr-1 - 25°C, 2 generation, replicate 2	mRNA	simr-1(cmp36) I	1-day-old adult	26113007	26087132	25444742
simr-1 - 25°C, 2 generation, replicate 3	mRNA	simr-1(cmp36) I	1-day-old adult	30007006	29989416	27907397
simr-1 - 25°C, 7 generation, replicate 1	mRNA	simr-1(cmp36) I	1-day-old adult	49488522	49434094	46002766
simr-1 - 25°C, 7 generation, replicate 2	mRNA	simr-1(cmp36) I	1-day-old adult	45140044	45093328	42158759
simr-1 - 25°C, 7 generation, replicate 3	mRNA	simr-1(cmp36) I	1-day-old adult	21284148	21259209	19742993
simr-1 - 25°C, 10 generation, replicate 1	mRNA	simr-1(cmp36) I	1-day-old adult	17183373	17152988	15851350
simr-1 - 25°C, 10 generation, replicate 2	mRNA	simr-1(cmp36) I	1-day-old adult	17654930	17630777	16345946
simr-1 - 25°C, 10 generation, replicate 3	mRNA	simr-1(cmp36) I	1-day-old adult	19693935	19668666	18272225
