# Supplementary figures and images for: A tudor domain protein, SIMR-1, promotes siRNA production at piRNA-targeted mRNAs in C. elegans
Source: eLife journal article supplement (doi:10.7554/elife.56731), 2020-04-27

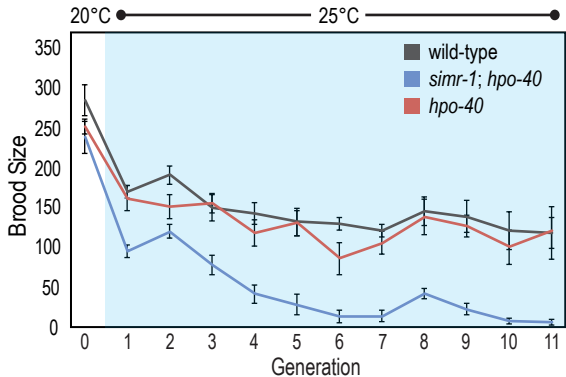

Supplement: supp [file elife_poa_e56731_Figure_3_figure_supplement_1.pdf › elife_poa_e56731_Figure_3_figure_supplement_1.pdf]

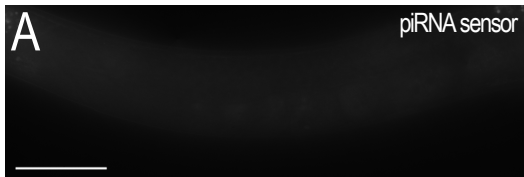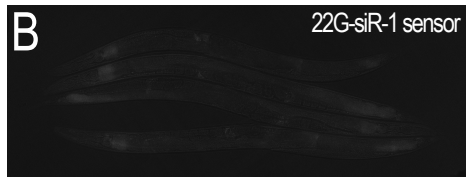

**C**

| gene          | <i>lir-1</i> | <i>hmr-1</i> | <i>dpy-13</i> |
|---------------|--------------|--------------|---------------|
| wild-type     | -            | -            | -             |
| <i>eri-7</i>  | +            | +            | +             |
| <i>simr-1</i> | -            | -            | -             |

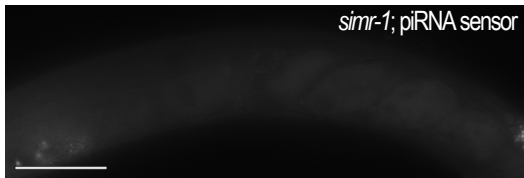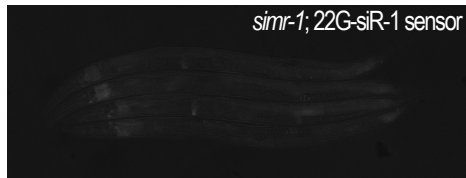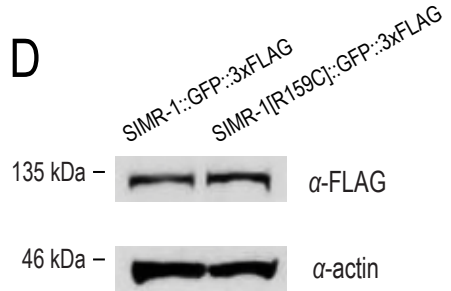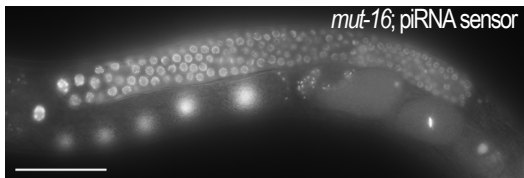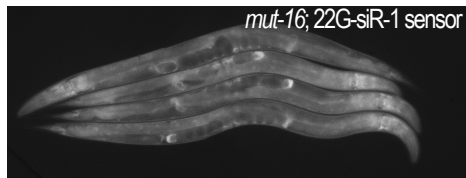

Supplement: supp [file elife_poa_e56731_Figure_4_figure_supplement_1.pdf › elife_poa_e56731_Figure_4_figure_supplement_1.pdf]

**A*****simr-1* mutants (25°C)**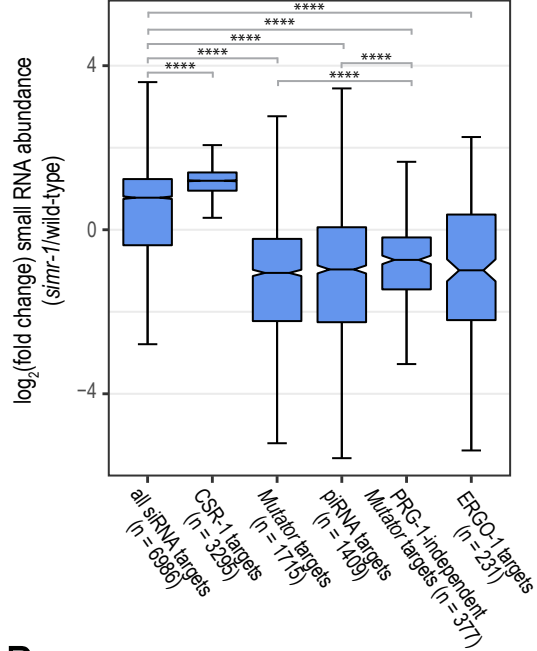**C****Genes depleted of small RNAs**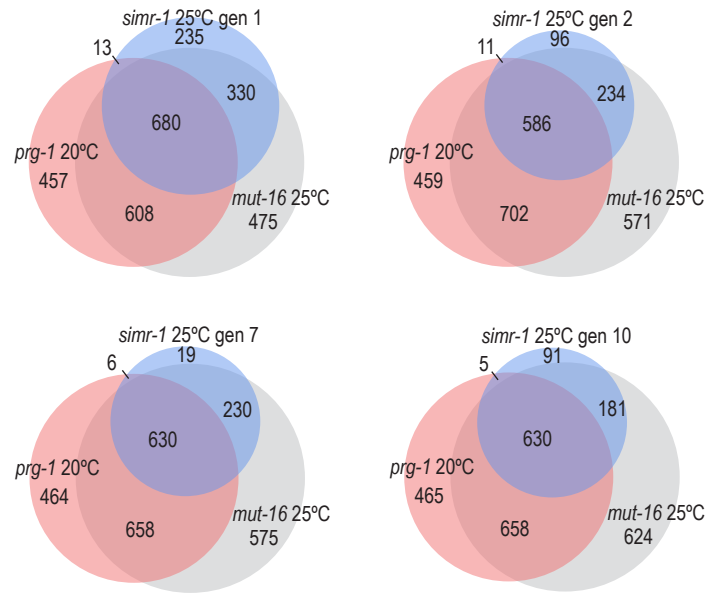**B****endogenous RDE-1 target gene**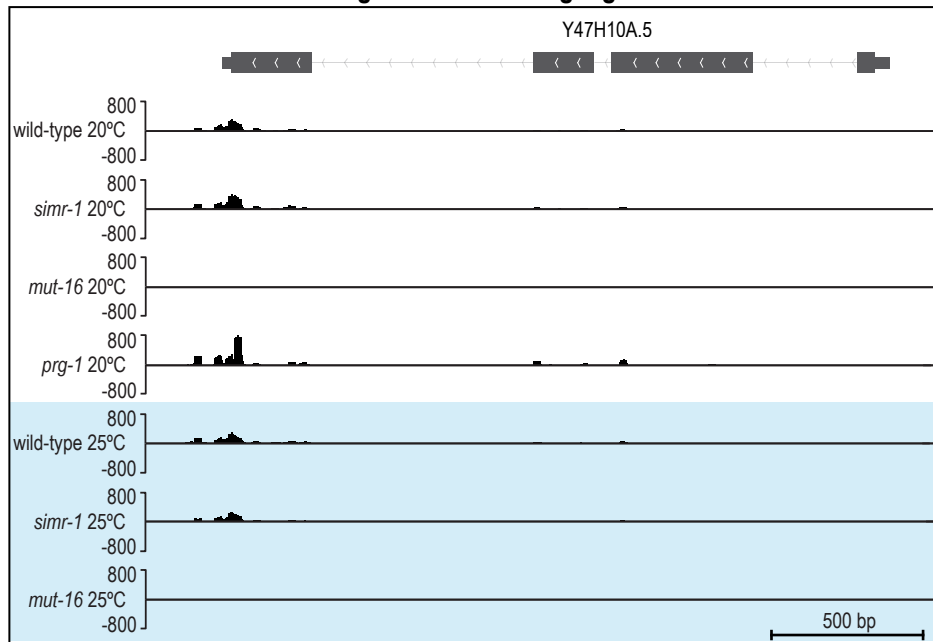**D****piRNA-target genes**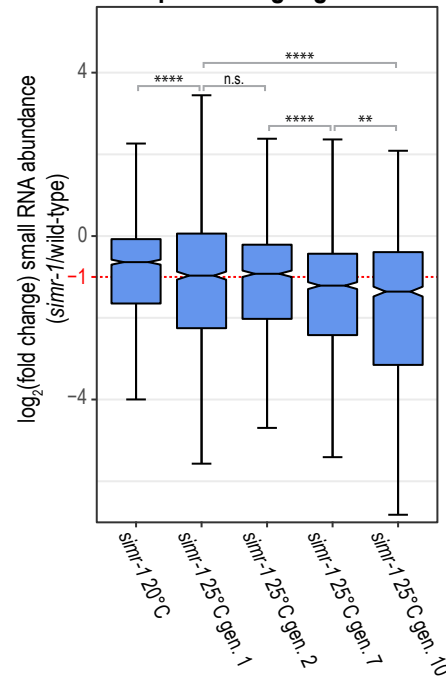

Supplement: supp [file elife_poa_e56731_Figure_5_figure_supplement_1.pdf › elife_poa_e56731_Figure_5_figure_supplement_1.pdf]

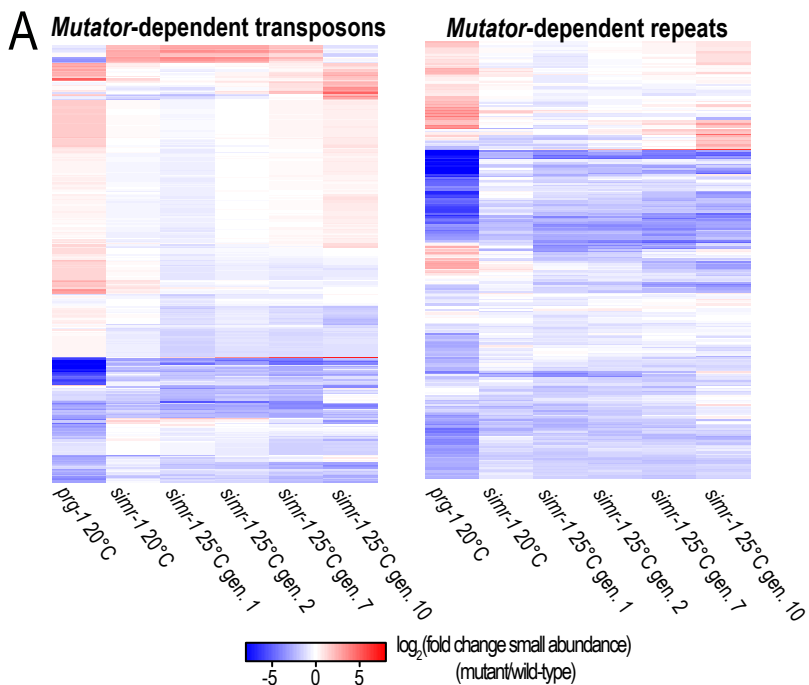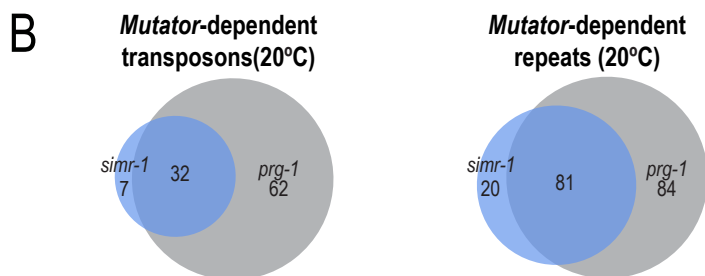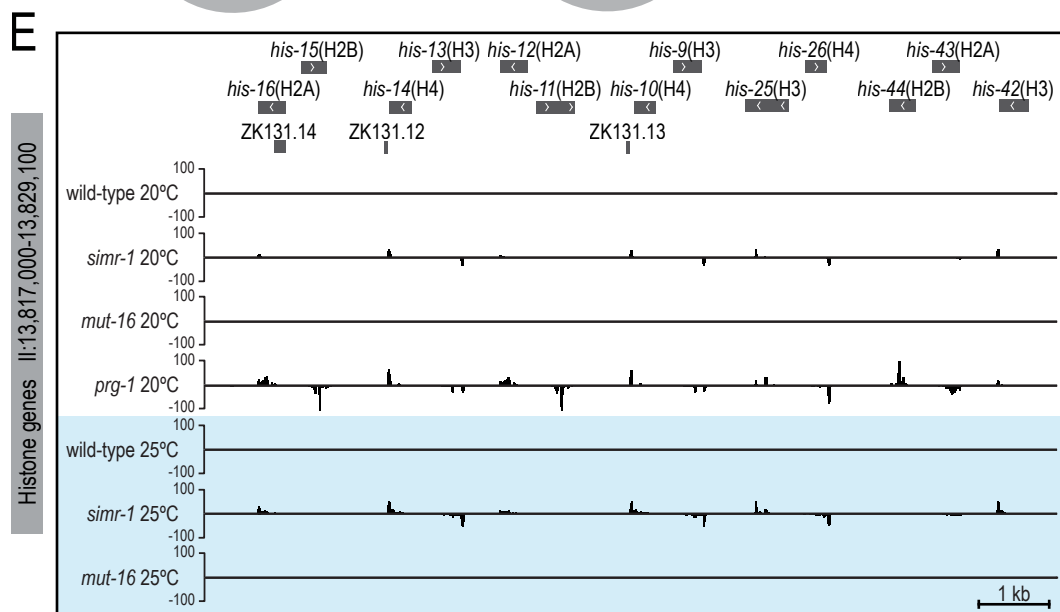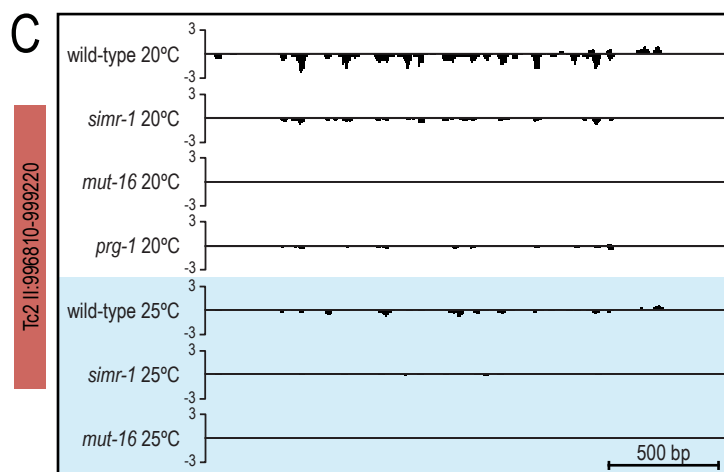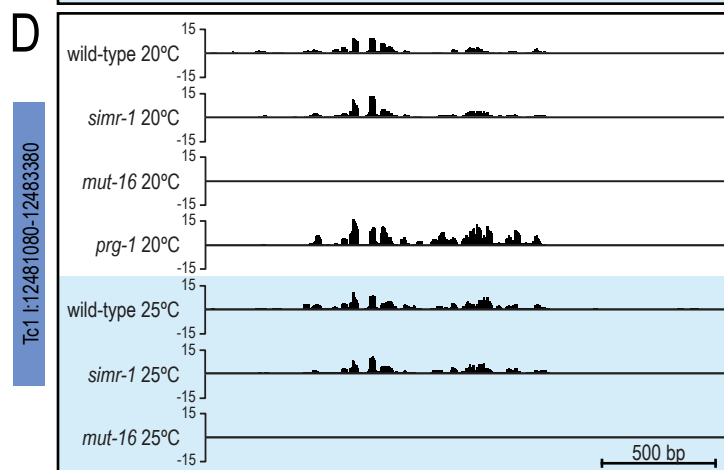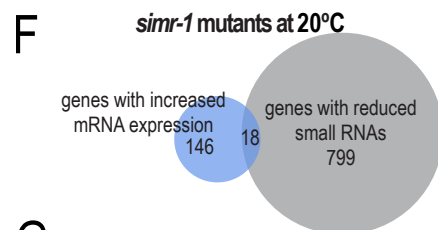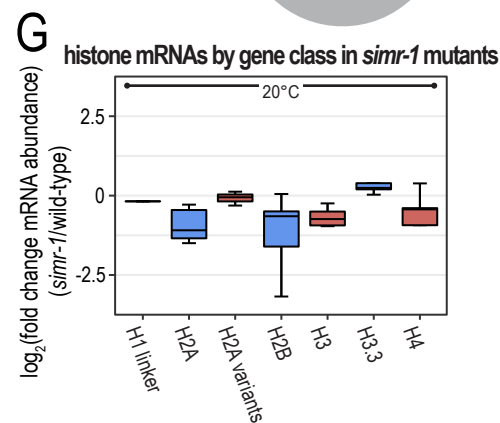

Supplement: supp [file elife_poa_e56731_Figure_6_figure_supplement_1.pdf › elife_poa_e56731_Figure_6_figure_supplement_1.pdf]

A

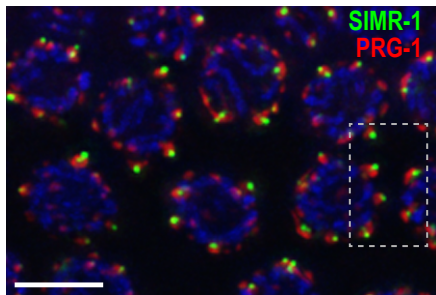

B

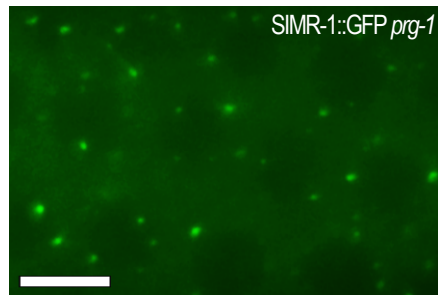

C

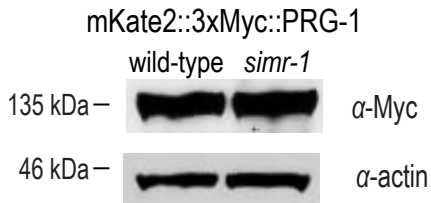

*simr-1* mKate2::PRG-1

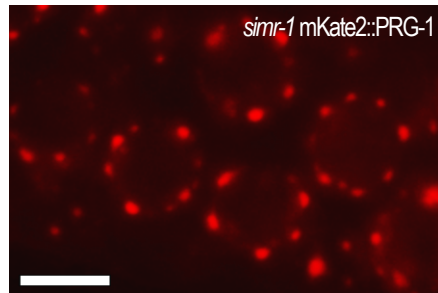

Supplement: supp [file elife_poa_e56731_Figure_7_figure_supplement_1.pdf › elife_poa_e56731_Figure_7_figure_supplement_1.pdf]
